# Supplementary material for: Microbiota in intestinal digesta of Atlantic salmon (Salmo salar), observed from late freshwater stage until one year in seawater, and effects of functional ingredients: a case study from a commercial sized research site in the Arctic region
Source: Anim Microbiome. 2021 Jan 28;3:14. doi: 10.1186/s42523-021-00075-7 (PMC7841887; doi:10.1186/s42523-021-00075-7)
Supplement: Supplementary file 2 — Additional file 2: Table S1. Relative abundance of all ASVs for each sample. [file 42523_2021_75_MOESM2_ESM.xlsx]

## Sheet: Table S1
Table S1: Relative abundance of all ASVs for each sample
Sampling ID	39	41	50	51	53	61	62	63	46	48	59	67	68	69	70	71	138	139	149	150	151	161	162	163	144	145	155	156	157	167	168	169	438	439	449	451	452	461	462	463	444	445	456	457	458	467	468	469	645
Diet	Ref	Ref	Ref	Ref	Ref	Ref	Ref	Ref	Test	Test	Test	Test	Test	Test	Test	Test	Ref	Ref	Ref	Ref	Ref	Ref	Ref	Ref	Test	Test	Test	Test	Test	Test	Test	Test	Ref	Ref	Ref	Ref	Ref	Ref	Ref	Ref	Test	Test	Test	Test	Test	Test	Test	Test	Ref
Samping time points	FW	FW	FW	FW	FW	FW	FW	FW	FW	FW	FW	FW	FW	FW	FW	FW	SW1	SW1	SW1	SW1	SW1	SW1	SW1	SW1	SW1	SW1	SW1	SW1	SW1	SW1	SW1	SW1	SW2	SW2	SW2	SW2	SW2	SW2	SW2	SW2	SW2	SW2	SW2	SW2	SW2	SW2	SW2	SW2	SW3
Treatment	FW-Ref	FW-Ref	FW-Ref	FW-Ref	FW-Ref	FW-Ref	FW-Ref	FW-Ref	FW-Test	FW-Test	FW-Test	FW-Test	FW-Test	FW-Test	FW-Test	FW-Test	SW1-Ref	SW1-Ref	SW1-Ref	SW1-Ref	SW1-Ref	SW1-Ref	SW1-Ref	SW1-Ref	SW1-Test	SW1-Test	SW1-Test	SW1-Test	SW1-Test	SW1-Test	SW1-Test	SW1-Test	SW2-Ref	SW2-Ref	SW2-Ref	SW2-Ref	SW2-Ref	SW2-Ref	SW2-Ref	SW2-Ref	SW2-Test	SW2-Test	SW2-Test	SW2-Test	SW2-Test	SW2-Test	SW2-Test	SW2-Test	SW3-Ref
Phylum;Class;Order;Family;Genus;Species
Acidobacteria;Acidobacteriia;Solibacterales;Solibacteraceae (Subgroup 3);Bryobacter;uncultured prokaryote	0	0	0	0	0	0	0	0	0	0	0	0	0	0	0	0	0	0	0	0	0	0	0	0	0	0	0	0	0	0	0	0	0	0	0	0	0	0	0	0	0	0	0	0	0	0.0170262	0	0	0
Acidobacteria;Acidobacteriia;Solibacterales;Solibacteraceae (Subgroup 3);Paludibaculum;metagenome	0	0	0	0	0	0	0	0	0	0	0	0	0	0	0	0	0	0	0	0	0	0	0	0	0	0	0	0	0	0	0	0	0	0.0272068	0	0	0	0	0	0	0	0	0	0	0	0	0	0	0
Acidobacteria;Blastocatellia (Subgroup 4);11-24;uncultured bacterium;uncultured bacterium;uncultured bacterium	0	0	0	0	0	0	0	0	0	0	0	0	0	0	0	0	0	0	0	0	0	0	0	0	0	0	0	0	0	0	0.0056501	0	0	0	0	0	0	0	0	0	0	0	0	0	0	0	0	0	0
Acidobacteria;Blastocatellia (Subgroup 4);Blastocatellales;Blastocatellaceae;Blastocatella;uncultured Terriglobus sp.	0	0	0	0	0	0	0	0	0	0	0	0	0	0	0	0	0	0	0	0	0	0	0	0	0	0	0	0	0	0	0	0	0	0	0	0	0	0	0	0	0	0	0	0	0	0	0	0	0
Acidobacteria;Blastocatellia (Subgroup 4);Blastocatellales;Blastocatellaceae;Blastocatella;uncultured bacterium	0	0	0	0	0	0	0	0	0	0	0	0	0	0	0	0	0	0	0	0	0	0	0	0	0	0	0	0	0	0	0	0	0	0	0	0	0	0	0	0	0	0	0	0	0	0	0	0	0
Acidobacteria;Blastocatellia (Subgroup 4);Blastocatellales;Blastocatellaceae;Blastocatella;__	0	0	0	0	0	0	0	0	0	0	0	0	0	0	0	0	0	0	0	0	0	0	0	0	0	0	0	0	0	0	0	0	0	0	0	0	0	0	0	0	0	0	0	0	0	0	0	0	0
Acidobacteria;Blastocatellia (Subgroup 4);Blastocatellales;Blastocatellaceae;JGI 0001001-H03;__	0	0	0	0	0	0	0	0	0	0	0	0	0	0	0	0	0	0	0	0	0	0	0	0	0	0	0	0	0	0	0	0	0	0	0	0.0149317	0	0	0	0	0	0	0	0	0	0	0	0	0
Acidobacteria;Subgroup 6;__;__;__;__	0.0133008	0	0	0	0	0	0	0	0	0	0	0	0	0	0	0	0	0	0	0	0	0	0	0	0	0	0	0	0	0	0	0	0	0	0	0	0	0	0	0	0	0	0	0.00595088	0	0	0	0	0
Actinobacteria;Acidimicrobiia;Actinomarinales;Actinomarinaceae;Candidatus Actinomarina;__	0	0	0	0	0	0	0	0	0	0	0	0	0	0	0	0	0	0	0	0	0	0	0	0	0	0	0	0	0	0	0	0	0	0	0	0	0	0.0268704	0.00925869	0	0	0	0	0	0	0.033343	0	0	0
Actinobacteria;Acidimicrobiia;IMCC26256;metagenome;metagenome;metagenome	0	0	0.018229	0	0	0	0	0	0	0	0	0	0	0	0	0	0	0	0	0	0	0	0	0	0	0	0	0	0	0	0	0	0	0	0	0	0	0	0	0	0	0	0	0	0	0	0	0	0
Actinobacteria;Acidimicrobiia;IMCC26256;__;__;__	0	0	0	0	0	0	0	0	0	0	0	0	0	0	0	0	0	0	0	0	0	0	0	0	0	0	0.0503486	0	0	0	0	0	0	0	0	0	0	0	0	0	0	0	0	0	0	0	0.00761012	0	0
Actinobacteria;Acidimicrobiia;Microtrichales;Iamiaceae;Iamia;metagenome	0.164043	0	0	0	0	0	0	0	0	0	0	0	0	0	0	0	0	0	0	0	0	0	0	0	0	0	0	0	0	0	0	0	0.050408	0	0	0	0	0.00383862	0	0	0	0	0	0.0178526	0	0	0	0	0
Actinobacteria;Acidimicrobiia;Microtrichales;Iamiaceae;Iamia;__	0	0	0	0	0	0	0	0	0	0	0	0	0	0	0	0	0	0	0	0	0	0	0	0	0	0	0	0	0	0	0	0.00635607	0	0	0	0	0	0	0	0	0	0	0	0	0	0	0	0	0
Actinobacteria;Acidimicrobiia;Microtrichales;Ilumatobacteraceae;CL500-29 marine group;uncultured Acidimicrobiales bacterium	0	0	0	0	0	0	0	0.301234	0	0	0	0	0	0	0	0	0	0	0	0	0	0	0	0	0	0	0	0	0	0	0	0	0	0	0	0	0	0	0	0	0	0	0	0	0	0	0	0	0
Actinobacteria;Acidimicrobiia;Microtrichales;Ilumatobacteraceae;CL500-29 marine group;__	0	0	0	0	0	0	0	0	0	0	0	0	0	0	0	0	0	0	0	0	0	0	0	0	0	0	0	0	0	0	0	0	0	0	0	0	0	0	0	0	0	0	0	0	0	0	0	0	0
Actinobacteria;Acidimicrobiia;Microtrichales;Ilumatobacteraceae;Ilumatobacter;Ambiguous_taxa	0	0	0	0	0	0	0	0	0	0	0	0	0	0	0	0	0	0	0	0	0	0	0	0	0	0	0	0	0	0	0	0	0	0	0	0	0	0	0.0308623	0	0.161017	0	0	0	0	0	0	0	0
Actinobacteria;Acidimicrobiia;Microtrichales;Ilumatobacteraceae;Ilumatobacter;uncultured bacterium	0	0	0	0	0	0	0	0	0	0	0	0	0	0	0	0	0	0	0	0	0	0	0	0	0	0	0	0	0	0	0	0	0	0	0	0	0	0	0	0	0	0	0	0.037193	0	0	0	0	0
Actinobacteria;Acidimicrobiia;Microtrichales;Ilumatobacteraceae;Ilumatobacter;__	0	0	0	0	0	0	0	0	0	0	0	0	0	0	0	0	0	0	0	0	0	0	0	0	0	0	0	0	0	0	0	0	0	0	0	0.0149317	0	0	0	0	0	0	0	0	0	0	0	0	0
Actinobacteria;Acidimicrobiia;Microtrichales;Microtrichaceae;IMCC26207;uncultured bacterium	0	0	0	0	0	0	0	0.09168	0	0.0102372	0	0	0	0	0	0	0	0	0	0	0	0	0	0.00751004	0	0	0	0	0	0	0	0	0	0	0	0	0	0	0	0	0	0	0	0	0	0	0	0	0
Actinobacteria;Acidimicrobiia;Microtrichales;Microtrichaceae;IMCC26207;__	0	0	0	0	0	0	0	0	0	0	0	0	0	0	0	0	0	0	0	0	0	0	0	0	0	0	0	0	0	0	0	0	0	0	0	0	0	0	0	0	0	0	0	0	0	0	0	0	0
Actinobacteria;Acidimicrobiia;Microtrichales;Microtrichaceae;Sva0996 marine group;Ambiguous_taxa	0	0	0	0	0	0	0	0	0	0	0	0	0	0	0	0	0	0	0	0	0	0	0	0	0	0	0	0	0	0	0	0	0	0	0	0	0	0	0	0	0	0	0	0	0	0	0	0	0
Actinobacteria;Acidimicrobiia;Microtrichales;uncultured;__;__	0	0	0	0	0	0	0	0	0	0	0	0	0	0	0	0	0	0	0	0	0	0	0	0	0	0	0	0	0	0	0	0	0	0	0	0	0	0	0	0	0	0	0	0	0	0	0.0251134	0	0
Actinobacteria;Acidimicrobiia;uncultured;uncultured actinobacterium;uncultured actinobacterium;uncultured actinobacterium	0	0	0	0	0	0	0	0	0	0	0	0	0	0	0	0	0	0	0	0	0	0	0	0	0	0	0	0	0	0	0	0	0	0	0	0	0	0	0	0	0	0	0	0	0	0	0.00532708	0	0
Actinobacteria;Actinobacteria;Actinomycetales;Actinomycetaceae;Actinomyces;Ambiguous_taxa	0	0	0	0.0236804	0	0	0	0	0	0	0	0	0	0	0	0	0	0	0	0	0.0197895	0	0	0	0	0	0	0	0	0	0	0	0	0	0	0	0	0	0	0	0	0	0	0	0	0	0	0	0
Actinobacteria;Actinobacteria;Actinomycetales;Actinomycetaceae;Actinomyces;Actinomyces nasicola	0	0	0	0	0	0	0	0	0	0	0	0	0	0	0	0	0	0	0	0	0.0162973	0	0	0	0	0	0	0	0	0	0.00904016	0	0	0	0	0	0	0	0.0339485	0	0	0	0	0	0	0	0	0.00543463	0
Actinobacteria;Actinobacteria;Actinomycetales;Actinomycetaceae;Actinomyces;Actinomyces sp. MD1	0	0	0	0	0	0	0	0	0	0	0	0	0	0	0	0	0	0	0	0	0	0	0	0	0	0	0	0	0	0	0	0	0.031505	0	0	0	0	0	0	0	0	0	0	0	0	0	0	0	0
Actinobacteria;Actinobacteria;Actinomycetales;Actinomycetaceae;Actinomyces;uncultured Actinomyces sp.	0	0	0	0	0	0	0	0	0	0	0	0	0	0	0	0	0.0220434	0	0	0	0	0	0	0	0	0	0	0	0	0	0	0	0	0	0	0	0	0	0	0	0	0	0	0	0	0	0	0	0
Actinobacteria;Actinobacteria;Bifidobacteriales;Bifidobacteriaceae;Bifidobacterium;Ambiguous_taxa	0	0	0	0	0	0	0	0	0	0	0	0	0	0	0	0	0	0	0.0590026	0	0	0	0	0.00375502	0	0	0	0	0	0	0	0	0	0	0	0	0	0	0	0	0	0	0	0	0	0	0	0	0.00409484
Actinobacteria;Actinobacteria;Bifidobacteriales;Bifidobacteriaceae;Bifidobacterium;Bifidobacterium thermophilum	0	0	0	0	0	0	0	0	0	0	0	0	0	0	0	0	0	0	0	0	0	0	0	0	0	0	0	0	0	0	0	0	0	0	0	0	0	0.00255908	0	0	0	0	0.00306545	0.0208281	0	0	0	0	0
Actinobacteria;Actinobacteria;Corynebacteriales;Corynebacteriaceae;Ambiguous_taxa;Ambiguous_taxa	0	0	0	0	0	0	0	0	0	0	0	0	0	0	0	0	0	0.021825	0	0	0	0	0	0	0	0	0	0	0	0	0	0	0	0	0.0124227	0	0	0	0	0	0	0	0	0	0	0	0	0	0
Actinobacteria;Actinobacteria;Corynebacteriales;Corynebacteriaceae;Corynebacterium 1;Ambiguous_taxa	0.274884	0	0.0805116	0.33863	0.439984	0	0	0.219377	0	0	0	0.124541	0.0300066	0.098715	0	0	0.0183695	0.196425	0	0.00960892	0	0	0	0.0425569	0.0123661	0	0.0595029	0.00562248	0	0.0270476	0	0.0139833	0.138622	0.116247	0.0510711	0	0.067183	0.0281499	0	0.0421141	0.0839343	0.0346356	0.00306545	0.1696	0.0103239	0.00354713	0	0	0.153966
Actinobacteria;Actinobacteria;Corynebacteriales;Corynebacteriaceae;Corynebacterium 1;Corynebacterium aurimucosum ATCC 700975	0	0	0	0	0	0	0	0	0	0	0	0	0	0	0	0	0	0	0	0	0	0	0	0	0	0	0	0	0	0	0	0	0.037806	0.0098934	0.0607332	0	0.0130634	0.0294295	0.0956731	0	0	0	0	0	0	0	0	0	0
Actinobacteria;Actinobacteria;Corynebacteriales;Corynebacteriaceae;Corynebacterium 1;Corynebacterium genitalium	0	0	0	0	0	0	0	0	0	0	0	0	0	0	0	0	0	0	0	0.0260813	0	0	0	0	0	0	0.0305143	0	0	0	0	0	0	0	0.0455499	0.0373292	0	0	0	0	0	0	0	0	0	0.0148979	0	0	0
Actinobacteria;Actinobacteria;Corynebacteriales;Corynebacteriaceae;Corynebacterium 1;Corynebacterium glutamicum	0.523166	0	0	0	0	0	0	0	13.7267	1.65587	11.1892	6.66296	16.7317	11.7939	0	0	0.101032	0.00915242	0.339855	0.166097	0.176942	0.252115	0	0.23156	0	0.00682475	0.0183086	0	0	0	0	0	0.119719	0	0.0745362	0.0671926	0	0.0690952	0.0833282	0.392188	3.17237	0.365406	0.118531	1.9623	3.0662	0.473897	0	0.259504	0.134311
Actinobacteria;Actinobacteria;Corynebacteriales;Corynebacteriaceae;Corynebacterium 1;Corynebacterium xerosis	0	0	0	0	0	0	0	0	0	0	0	0	0	0	0	0	0	0	0	0	0	0	0	0	0	0	0	0	0	0	0.00791014	0	0	0	0	0	0	0.0358272	0	0	0	0	0	0	0	0	0	0	0
Actinobacteria;Actinobacteria;Corynebacteriales;Corynebacteriaceae;Corynebacterium 1;uncultured bacterium	0	0	0	0	0	0	0	0	0	0	0	0	0	0	0	0	0	0	0	0	0.0104768	0	0	0	0	0	0	0	0	0	0	0	0	0	0.0096621	0	0	0	0	0	0	0	0	0	0	0	0	0	0
Actinobacteria;Actinobacteria;Corynebacteriales;Corynebacteriaceae;Corynebacterium 1;uncultured organism	0	0	0	0	0	0	0	0	0	0	0	0	0	0	0	0	0	0	0	0	0	0	0	0	0	0	0	0	0	0	0	0	0.025204	0	0	0	0	0	0	0	0	0	0	0	0	0	0	0	0
Actinobacteria;Actinobacteria;Corynebacteriales;Corynebacteriaceae;Corynebacterium 1;__	0.401241	0	0	0.195363	0.265823	0	0	0.222652	0.149339	0.623192	1.1237	0.136773	0.628138	0.0501941	0	0	0.139608	0.0492822	0.044842	0	0.0174614	0.0304569	0	0	0.00618305	0	0	0	0.00646488	0.0295065	0	0	0.100816	0	0	0.0199089	0	0.108761	0.0617246	0.265845	0	0.0173178	0	0	0.123887	0	0.00913214	0	0.0384915
Actinobacteria;Actinobacteria;Corynebacteriales;Corynebacteriaceae;Corynebacterium;Ambiguous_taxa	0	0	0	0	0	0	0	0	0	0	0	0	0	0	0	0	0	0.022529	0	0	0	0	0	0	0	0	0	0	0	0	0	0	0	0	0	0	0	0	0	0	0	0	0	0	0	0.00709426	0	0	0
Actinobacteria;Actinobacteria;Corynebacteriales;Corynebacteriaceae;Corynebacterium;Corynebacterium sp.	0	0	0	0	0	0	0	0	0	0	0	0	0	0	0	0	0	0	0	0	0	0	0	0	0	0	0	0	0	0	0	0	0	0	0	0	0	0	0	0	0	0	0	0	0	0	0	0	0
Actinobacteria;Actinobacteria;Corynebacteriales;Corynebacteriaceae;Corynebacterium;uncultured bacterium	0	0	0	0	0	0	0	0	0	0	0	0	0	0	0	0	0	0	0	0	0	0	0	0	0	0	0	0	0	0	0	0.0546622	0	0	0	0	0	0	0	0	0	0	0	0	0	0	0	0	0
Actinobacteria;Actinobacteria;Corynebacteriales;Corynebacteriaceae;Lawsonella;Ambiguous_taxa	0	0	0	0	0	0	0	0	0.0088892	0	0.00596917	0	0	0	0	0	0	0	0	0	0	0	0	0	0	0	0	0	0.00775785	0	0.0056501	0	0.018903	0	0	0	0	0	0	0	0	0	0	0	0	0	0	0	0
Actinobacteria;Actinobacteria;Corynebacteriales;Corynebacteriaceae;__;__	0.27045	0	0	0.168131	0.829552	0	0	0	0	0	0.0746146	0	0	0	0	0	0	0	0.023601	0.0549081	0.0407432	0.0270728	0	0.0137684	0	0.0310905	0	0	0	0	0	0	0	0.0964606	0.069015	0	0	0.0179136	0	0	0	0	0	0	0	0.00851311	0	0	0
Actinobacteria;Actinobacteria;Corynebacteriales;Corynebacteriales Incertae Sedis;Tomitella;Ambiguous_taxa	0	0	0	0	0	0	0	0	0	0	0	0	0.0400088	0	0	0	0	0	0	0	0	0	0	0	0	0	0	0	0	0	0	0	0	0	0	0	0	0	0	0	0	0	0	0	0	0	0	0	0
Actinobacteria;Actinobacteria;Corynebacteriales;Dietziaceae;Dietzia;Ambiguous_taxa	0	0	0	0	0	0	0	0.0589372	0	0	0	0	0	0	0	0	0	0	0	0	0	0	0	0	0	0	0	0	0	0	0	0	0	0	0	0	0	0	0	0	0	0	0	0	0	0	0	0	0
Actinobacteria;Actinobacteria;Corynebacteriales;Mycobacteriaceae;Mycobacterium;Ambiguous_taxa	0.137442	0	0	0.0106562	0	0	0	0	0.0817807	0	0.213398	0.0366952	0	0.00501941	0	0	0.0606194	0	0	0	0	0	0	0	0	0	0	0	0	0	0	0	0	0	0	0	0	0	0	0	0	0	0	0	0	0	0	0	0
Actinobacteria;Actinobacteria;Corynebacteriales;Nocardiaceae;Gordonia;Ambiguous_taxa	0	0	0	0.0888015	0.357487	0	0	0	0	0	0	0	0	0	0	0	0	0	0.0141606	0	0	0	0	0	0	0	0	0	0	0	0	0	0	0	0	0	0	0	0	0	0	0	0	0	0	0	0	0	0
Actinobacteria;Actinobacteria;Corynebacteriales;Nocardiaceae;Rhodococcus;Ambiguous_taxa	0	0	0	0.0224964	0	0	0	0	0	0	0	0	0	0	0	0	0	0	0	0	0	0	0	0	0	0	0	0	0	0	0	0	0	0	0	0	0	0	0	0	0	0	0	0	0	0	0	0	0
Actinobacteria;Actinobacteria;Corynebacteriales;Nocardiaceae;Rhodococcus;Rhodococcus erythropolis	0	0	0	0	0	0	0	0	0	0	0	0	0	0	0	0	0	0	0	0	0	0	0	0	0	0	0	0	0	0	0	0	0	0	0	0	0	0	0	0	0	0	0	0	0	0	0	0	0
Actinobacteria;Actinobacteria;Corynebacteriales;Nocardiaceae;Rhodococcus;__	0.0487697	0	0.0425344	0.268773	0.027499	0	0	0	0	0.00895759	0	0	0	0.0451747	0	0	0.0716411	0.0401298	0	0.0150997	0.0232818	0	0	0.0312919	0.0200949	0	0.0244115	0.00632529	0.00646488	0.0418009	0.0169503	0.035594	0	0.0593604	0	0.0659483	0	0.0115159	0.0709833	0	0.0291201	0	0.00817453	0	0.141954	0	0	0.00951061	0.00409484
Actinobacteria;Actinobacteria;Corynebacteriales;Nocardiaceae;Williamsia;Ambiguous_taxa	0	0	0	0	0	0	0	0	0	0	0	0	0	0	0	0	0	0	0	0	0	0.0219966	0	0	0	0	0	0	0	0	0	0	0	0	0	0	0	0	0	0	0	0	0	0	0	0	0	0	0
Actinobacteria;Actinobacteria;Corynebacteriales;Tsukamurellaceae;Tsukamurella;Tsukamurella pulmonis	0	0	0	0	0	0	0	0.1146	0	0	0	0	0	0	0	0	0	0	0	0	0	0	0	0	0	0	0	0	0	0	0	0	0	0	0	0	0	0	0	0	0	0	0	0	0	0	0	0	0
Actinobacteria;Actinobacteria;Frankiales;Cryptosporangiaceae;Fodinicola;Ambiguous_taxa	0	0	0	0.00947216	0	0	0	0	0.0231119	0	0	0	0.102022	0	0	0	0	0	0	0	0	0	0	0	0	0	0	0.0105421	0.0129298	0	0	0.00635607	0.0094515	0.0247335	0.0483105	0	0	0	0	0.121078	0	0	0	0	0.0129049	0	0	0	0
Actinobacteria;Actinobacteria;Frankiales;Cryptosporangiaceae;Fodinicola;metagenome	0	0	0.159504	0	0	0	0	0	0	0	0	0	0	0	0	0	0	0	0	0	0	0	0	0	0	0	0	0	0	0	0	0	0	0	0	0	0	0	0	0	0	0	0	0	0	0	0.00532708	0	0
Actinobacteria;Actinobacteria;Frankiales;Sporichthyaceae;Ambiguous_taxa;Ambiguous_taxa	0	0	0	0	0	0	0	0	0	0	0	0	0	0	0	0	0	0	0	0	0	0	0	0.00876172	0	0	0	0.00913653	0	0	0	0	0	0	0	0	0	0	0	0	0	0	0	0.0193403	0	0	0	0	0
Actinobacteria;Actinobacteria;Frankiales;Sporichthyaceae;Candidatus Planktophila;__	0	0	0	0	0	0	0	0	0	0	0	0	0	0	0	0	0	0	0	0	0	0	0	0	0	0	0	0	0	0	0	0	0	0	0	0.0261305	0.0242605	0	0	0	0	0	0	0	0	0	0	0	0
Actinobacteria;Actinobacteria;Frankiales;Sporichthyaceae;Sporichthya;uncultured bacterium	0	0	0	0	0	0	0	0	0	0	0	0	0	0	0	0	0	0	0	0	0	0	0	0	0	0	0	0.0224899	0	0	0	0	0	0	0	0	0.0522534	0	0	0	0	0	0	0	0	0	0	0	0
Actinobacteria;Actinobacteria;Frankiales;Sporichthyaceae;__;__	0	0	0	0	0	0	0	0.06876	0.193785	0	0.0537225	0	0	0	0	0	0	0	0	0	0	0	0	0	0	0	0	0	0.00646488	0	0	0	0	0	0	0	0	0	0	0	0	0	0	0	0	0	0	0	0
Actinobacteria;Actinobacteria;Kineosporiales;Kineosporiaceae;Kineococcus;Ambiguous_taxa	0	0	0	0	0	0	0	0	0	0	0	0	0.0160035	0	0	0	0	0	0	0.00686351	0	0	0	0	0	0	0	0	0	0	0	0	0	0	0	0	0	0.0127954	0	0	0	0	0	0.0252912	0	0	0	0	0
Actinobacteria;Actinobacteria;Kineosporiales;Kineosporiaceae;Kineococcus;Kineococcus sp. 13-29	0	0	0	0	0	0	0	0	0	0	0	0	0	0	0	0	0	0	0	0	0	0	0	0	0	0	0	0	0	0	0	0	0	0	0	0	0	0	0	0	0	0	0	0	0	0	0	0	0
Actinobacteria;Actinobacteria;Micrococcales;Beutenbergiaceae;Serinibacter sp. K3-2;Serinibacter sp. K3-2	0	0	0	0	0	0	0	0	0	0	0	0	0	0	0	0	0	0	0	0	0	0	0	0	0	0	0	0	0	0	0	0	0	0	0	0	0	0	0	0	0	0	0	0	0	0	0	0	0
Actinobacteria;Actinobacteria;Micrococcales;Brevibacteriaceae;Brevibacterium;Ambiguous_taxa	0	0	0	0	0	0	0	0	0	0	0	0	0	0	0	0	0.0110217	0.0732193	0	0.0109816	0.0616968	0	0	0	0	0.0250241	0	0	0	0	0	0	0.06301	0	0	0.00622154	0.0615844	0	0	0	0.0513883	0	0	0	0	0	0	0	0
Actinobacteria;Actinobacteria;Micrococcales;Brevibacteriaceae;Brevibacterium;uncultured Brevibacterium sp.	0	0	0	0	0	0	0	0	0	0	0	0	0	0	0	0	0	0	0	0	0	0	0	0	0	0	0	0	0	0	0	0	0	0	0	0	0	0	0	0	0	0	0	0	0	0	0	0	0.00573277
Actinobacteria;Actinobacteria;Micrococcales;Brevibacteriaceae;Brevibacterium;__	0.0753713	0.00264788	0.0136718	0.0224964	0.0183326	0	0	0	0	0.00895759	0.0298458	0.0211275	0	0	0	0	0.0330651	0.0682911	0.0306814	0.013727	0.0372509	0	0	0	0.0355525	0	0.0381429	0	0.0116368	0	0.0271205	0	0	0.111301	0.0607332	0	0	0	0.0154311	0.0131607	0.433375	0	0	0.0461193	0	0.00425656	0.00989315	0.00543463	0
Actinobacteria;Actinobacteria;Micrococcales;Cellulomonadaceae;Actinotalea;Ambiguous_taxa	0	0	0	0	0	0	0	0	0	0	0	0	0	0	0	0	0	0	0	0	0	0	0	0	0	0	0	0	0	0	0	0	0	0	0	0	0	0	0	0	0.0291201	0	0	0	0	0	0	0	0
Actinobacteria;Actinobacteria;Micrococcales;Dermabacteraceae;Brachybacterium;Ambiguous_taxa	0	0	0	0	0	0	0	0	0	0	0	0	0	0	0	0	0	0	0	0	0	0	0	0	0.0247322	0	0	0	0	0.0098355	0	0	0	0	0	0	0	0	0	0	0	0	0	0	0	0	0	0	0
Actinobacteria;Actinobacteria;Micrococcales;Dermabacteraceae;Brachybacterium;Brachybacterium paraconglomeratum	0	0	0.0729162	0	0	0	0	0.0491143	0	0	0	0	0	0	0	0	0	0.0204169	0	0	0.0151332	0	0	0	0	0	0.00762858	0	0	0	0	0	0	0	0	0	0	0	0	0	0	0.00865891	0	0.0520702	0	0	0	0	0
Actinobacteria;Actinobacteria;Micrococcales;Dermabacteraceae;Brachybacterium;Brachybacterium sp. SS-2009-PON14	0	0	0	0	0	0	0	0	0	0	0	0	0	0	0	0	0	0	0	0	0	0	0	0	0	0	0	0	0	0	0	0	0	0	0	0	0	0	0	0	0	0	0	0	0	0	0	0	0
Actinobacteria;Actinobacteria;Micrococcales;Dermabacteraceae;Brachybacterium;uncultured bacterium	0.0642873	0	0.0881071	0	0	0	0	0	0	0	0	0	0	0	0	0	0	0	0	0	0	0	0	0	0	0	0	0	0	0	0	0	0	0	0	0	0	0	0	0	0	0	0	0	0	0	0	0	0
Actinobacteria;Actinobacteria;Micrococcales;Dermabacteraceae;Brachybacterium;unidentified	0	0	0	0	0	0	0	0	0	0	0	0.047815	0	0	0	0	0	0	0	0	0	0	0	0	0	0	0	0	0	0	0	0	0	0	0	0	0	0	0	0	0	0	0	0	0	0	0	0	0
Actinobacteria;Actinobacteria;Micrococcales;Dermacoccaceae;Dermacoccus;__	0	0	0	0	0	0	0	0	0	0	0	0	0	0.102061	0	0	0	0	0	0	0	0	0	0	0	0	0	0	0	0	0	0	0	0	0	0	0	0	0	0	0	0	0	0	0	0	0	0	0
Actinobacteria;Actinobacteria;Micrococcales;Microbacteriaceae;Ambiguous_taxa;Ambiguous_taxa	0	0	0	0	0	0	0	0	0	0	0	0	0	0	0	0	0	0	0	0	0	0.0287648	0	0	0	0	0.0259372	0	0	0	0	0	0	0	0	0	0	0	0	0	0	0	0	0	0	0	0	0	0
Actinobacteria;Actinobacteria;Micrococcales;Microbacteriaceae;Agrococcus;Ambiguous_taxa	0	0	0	0	0	0	0	0	0	0	0	0	0	0	0	0	0	0	0	0.00411811	0	0	0	0	0	0	0	0	0	0	0	0	0	0	0	0	0	0	0	0	0	0	0	0	0.0154859	0	0	0	0
Actinobacteria;Actinobacteria;Micrococcales;Microbacteriaceae;Aurantimicrobium;Ambiguous_taxa	0.170694	0	0	0	0	0	0	0	0	0.0140762	0	0	0	0	0	0	0	0.0147847	0	0	0	0	0	0.0162718	0	0	0	0.00773091	0	0	0.0169503	0	0.081913	0	0	0	0	0	0	0.078964	0	0.0173178	0	0	0	0	0	0	0.0335777
Actinobacteria;Actinobacteria;Micrococcales;Microbacteriaceae;Candidatus Aquiluna;Ambiguous_taxa	0	0.0123568	0	0.291269	0.105413	0	0	0.363446	0.89781	0	0.0223844	0	0.0140031	0.0167314	0	0	0.0459238	0.0161927	0	0.05079	0.0104768	0	0	0.0212785	0.0417356	0.0159244	0.0381429	0.0210843	0.0413752	0.0442598	0.0655412	0.0114409	0.018903	0	0.0469302	0.0348406	0.0130634	0.0447839	0.0370348	0.0579069	0	0	0	0	0	0	0	0.0108693	0.0671553
Actinobacteria;Actinobacteria;Micrococcales;Microbacteriaceae;Candidatus Planktoluna;Ambiguous_taxa	0	0	0	0	0	0	0	0	0	0	0	0	0	0	0	0	0	0	0	0	0	0	0	0	0.0170034	0	0	0	0	0	0	0	0	0	0	0	0	0	0	0	0	0	0	0	0	0	0	0	0
Actinobacteria;Actinobacteria;Micrococcales;Microbacteriaceae;Clavibacter;Ambiguous_taxa	0	0	0	0	0	0	0	0.121149	0	0	0	0	0	0	0	0	0	0.0105605	0	0	0	0	0	0	0	0	0.0091543	0	0	0	0	0	0	0	0	0	0	0	0	0	0	0	0	0	0.0129049	0	0	0	0
Actinobacteria;Actinobacteria;Micrococcales;Microbacteriaceae;Clavibacter;__	0	0	0	0	0	0	0	0	0	0.00639828	0	0	0	0	0	0	0	0	0	0	0.0488918	0	0	0	0	0	0	0	0	0	0	0	0	0	0.0220848	0	0	0.0243113	0	0	0	0	0	0	0	0	0	0	0.0319397
Actinobacteria;Actinobacteria;Micrococcales;Microbacteriaceae;Curtobacterium;Ambiguous_taxa	0.0576369	0	0.034939	0.112482	0.568312	0	0	0	0	0	0	0	0.0380084	0.0284433	0	0	0	0.00985645	0.0212409	0.0109816	0	0.0507614	0	0.0200268	0.0432813	0.0242658	0.0381429	0	0.00905083	0	0.0180803	0	0.050408	0.0222601	0.0289863	0.0696812	0.0933097	0.177856	0.0833282	0.213203	0.479625	0	0	0.172575	0	0	0.00684911	0	0.0778019
Actinobacteria;Actinobacteria;Micrococcales;Microbacteriaceae;Frigoribacterium;Ambiguous_taxa	0	0	0	0.106562	0	0	0	0	0	0.0102372	0	0	0	0	0	0	0.15063	0.00774435	0.0306814	0	0	0.0541455	0	0.0137684	0	0	0	0	0	0	0.0293805	0	0.0346555	0	0.0082818	0.0273748	0	0	0	0	0.0599531	0	0	0.0223158	0	0	0	0	0
Actinobacteria;Actinobacteria;Micrococcales;Microbacteriaceae;Frigoribacterium;uncultured bacterium	0.11084	0	0.0106336	0.0828814	0	0	0	0.140794	0.0213341	0	0.096999	0	0	0	0	0	0.00734781	0	0	0	0.0442354	0	0	0	0.0494644	0.0219909	0	0	0.0219806	0.0270476	0.0316406	0	0	0.178081	0.082818	0	0	0.0179136	0	0.213203	0	0	0	0	0	0	0	0	0
Actinobacteria;Actinobacteria;Micrococcales;Microbacteriaceae;Frondihabitans;__	0	0	0	0	0	0	0	0	0	0.0179152	0	0	0	0	0	0	0	0	0	0	0.00465636	0	0	0	0	0	0	0	0	0	0	0.0432213	0	0	0	0	0	0	0	0	0	0	0	0	0	0	0	0	0
Actinobacteria;Actinobacteria;Micrococcales;Microbacteriaceae;Galbitalea;__	0.0620705	0	0	0	0	0	0	0	0	0	0	0	0	0	0	0	0	0	0	0	0	0	0	0	0	0	0	0	0	0	0	0	0	0	0	0	0	0	0	0	0	0	0	0	0	0	0	0	0
Actinobacteria;Actinobacteria;Micrococcales;Microbacteriaceae;Labedella;Ambiguous_taxa	0	0	0	0	0	0	0	0	0	0	0	0	0	0	0	0	0	0	0	0	0	0	0	0	0	0	0	0	0	0	0	0	0	0	0	0	0	0	0	0	0	0	0	0	0	0	0	0	0
Actinobacteria;Actinobacteria;Micrococcales;Microbacteriaceae;Leifsonia;__	0	0	0	0	0	0	0	0	0	0	0	0	0	0	0	0	0	0	0	0	0.0104768	0	0	0	0	0.0128912	0	0	0	0	0	0	0	0	0	0	0	0	0	0	0	0	0	0	0	0	0	0	0
Actinobacteria;Actinobacteria;Micrococcales;Microbacteriaceae;Leucobacter;Ambiguous_taxa	0	0	0	0	0	0	0	0	0	0	0	0	0	0.0284433	0	0	0	0	0	0.0109816	0	0	0	0	0.0309152	0	0	0	0	0	0.00452008	0	0	0	0	0	0	0.0127954	0	0	0	0	0	0	0	0	0	0	0.00982761
Actinobacteria;Actinobacteria;Micrococcales;Microbacteriaceae;Leucobacter;uncultured Leucobacter sp.	0	0	0	0	0	0	0	0	0	0.11261	0	0	0	0	0	0	0	0	0	0	0	0	0	0	0	0	0	0	0	0	0	0	0	0	0	0	0	0	0	0	0	0	0	0	0	0	0	0	0
Actinobacteria;Actinobacteria;Micrococcales;Microbacteriaceae;Leucobacter;__	0	0	0	0	0	0	0	0	0	0.0332711	0	0	0.0100022	0.00669254	0	0	0	0	0	0	0	0	0	0	0	0	0	0	0	0	0	0	0	0	0	0	0	0	0	0	0	0	0	0	0	0	0	0	0.00573277
Actinobacteria;Actinobacteria;Micrococcales;Microbacteriaceae;ML602J-51;uncultured marine bacterium	0	0	0	0	0	0	0	0	0	0	0	0	0	0	0	0	0	0.0528024	0.0283213	0.0205905	0	0	0	0.0187751	0	0	0	0	0.0142227	0.059013	0.0666712	0.0266955	0	0.0939873	0	0.0522609	0	0.0409453	0.00925869	0.0421141	0	0	0	0	0.0335527	0	0	0	0
Actinobacteria;Actinobacteria;Micrococcales;Microbacteriaceae;Microbacterium;Ambiguous_taxa	0	0	0	0	0	0	0	0	0	0	0	0	0	0	0	0	0	0	0	0.0123543	0	0.0389171	0	0	0	0	0	0	0.0336174	0	0	0	0	0	0	0	0	0.078052	0.0308623	0	0.0325459	0	0	0	0	0	0	0	0.0106466
Actinobacteria;Actinobacteria;Micrococcales;Microbacteriaceae;Microbacterium;Microbacterium arborescens	0	0	0	0	0	0	0	0.0425657	0	0	0	0	0	0	0	0	0	0	0	0	0	0	0	0	0	0	0	0	0	0	0	0	0	0	0	0	0	0	0	0	0	0	0	0	0	0	0	0	0
Actinobacteria;Actinobacteria;Micrococcales;Microbacteriaceae;Microbacterium;Microbacterium sp. DVS4a2	0	0	0	0	0	0	0	0	0	0	0	0	0	0	0	0	0	0	0	0	0	0	0	0	0	0	0	0	0	0	0	0	0	0	0	0	0	0	0	0	0	0	0	0	0	0	0	0	0
Actinobacteria;Actinobacteria;Micrococcales;Microbacteriaceae;Microbacterium;Microbacterium sp. YRR08	0	0	0	0	0	0	0	0	0	0	0	0	0	0	0	0	0	0	0	0	0	0	0	0.00751004	0	0.00834136	0	0	0	0	0	0	0	0.0123667	0	0	0	0	0	0	0.0445366	0	0	0	0	0	0	0	0
Actinobacteria;Actinobacteria;Micrococcales;Microbacteriaceae;Microbacterium;metagenome	0	0	0	0	0	0	0	0	0	0	0	0	0	0	0	0	0	0	0	0	0	0	0	0	0	0	0	0	0	0	0	0	0	0	0	0	0	0	0	0	0	0	0	0	0	0	0	0	0
Actinobacteria;Actinobacteria;Micrococcales;Microbacteriaceae;Microbacterium;uncultured Microbacterium sp.	0	0	0	0	0	0	0	0	0	0	0	0	0	0	0	0	0	0	0	0	0	0	0	0	0	0	0	0	0	0	0	0	0	0	0	0	0	0	0	0	0	0	0	0	0	0	0	0	0
Actinobacteria;Actinobacteria;Micrococcales;Microbacteriaceae;Microbacterium;uncultured bacterium	0	0	0	0	0	0	0	0	0	0	0	0	0	0	0	0	0	0	0	0	0	0	0	0	0	0	0	0	0	0	0	0	0	0	0	0	0	0	0.0277761	0	0	0	0	0	0	0	0	0	0
Actinobacteria;Actinobacteria;Micrococcales;Microbacteriaceae;Microbacterium;__	0	0	0	0	0	0	0	0	0	0	0	0	0	0	0	0	0	0	0	0.0109816	0	0	0	0	0	0	0	0	0	0	0	0	0	0	0.041409	0	0	0	0	0	0	0	0	0	0	0	0.0243524	0	0.0163793
Actinobacteria;Actinobacteria;Micrococcales;Microbacteriaceae;Okibacterium;Ambiguous_taxa	0	0	0	0	0	0	0	0	0	0	0	0	0	0	0	0	0	0.0140806	0	0	0	0	0	0	0	0	0	0	0	0	0	0	0	0	0	0	0	0	0.0154311	0	0.113054	0	0	0	0	0	0	0	0
Actinobacteria;Actinobacteria;Micrococcales;Microbacteriaceae;Plantibacter;Ambiguous_taxa	0	0	0	0	0	0	0	0	0	0	0	0.116757	0	0	0	0	0	0	0	0	0.0162973	0.0186125	0	0.0150201	0	0	0.00762858	0	0.00905083	0	0.00791014	0	0.0535585	0.0272068	0	0.0535052	0.0615844	0	0.0123449	0	0	0	0	0.0148772	0	0	0	0	0.0180173
Actinobacteria;Actinobacteria;Micrococcales;Microbacteriaceae;Pseudoclavibacter;Ambiguous_taxa	0	0	0	0	0	0	0	0	0	0	0.0238767	0	0	0	0	0	0	0	0	0	0.0151332	0	0	0	0.0185491	0	0.0091543	0	0	0	0	0	0	0	0	0	0	0	0	0	0	0	0	0	0	0	0	0	0
Actinobacteria;Actinobacteria;Micrococcales;Microbacteriaceae;Pseudoclavibacter;uncultured bacterium	0	0	0	0	0	0	0	0	0	0	0	0	0	0	0	0	0	0	0	0	0	0	0	0.0137684	0	0	0	0	0	0	0	0	0	0	0	0	0	0	0	0	0	0	0	0	0	0	0.00228304	0	0
Actinobacteria;Actinobacteria;Micrococcales;Microbacteriaceae;Pseudoclavibacter;__	0	0	0	0	0	0	0	0	0	0	0	0	0	0	0	0	0	0	0	0	0	0	0	0	0	0	0	0	0	0	0	0	0	0	0	0	0	0	0	0	0	0	0	0.0193403	0	0	0	0	0
Actinobacteria;Actinobacteria;Micrococcales;Microbacteriaceae;Rathayibacter;Ambiguous_taxa	0	0	0	0	0	0	0	0.176811	0	0	0	0	0	0	0	0	0.0312282	0	0.0188808	0.0288268	0.00698454	0	0	0.0150201	0	0	0	0.014759	0	0.0319654	0	0	0.148073	0.0272068	0	0.0846129	0	0	0.0216036	0.0315856	0	0.0190496	0	0	0	0	0	0.00679329	0
Actinobacteria;Actinobacteria;Micrococcales;Microbacteriaceae;Rhodoglobus;Ambiguous_taxa	0	0	0	0.153923	0	0	0	0.02292	0	0	0	0	0	0	0	0	0	0	0	0	0	0	0	0	0	0	0	0	0	0	0	0.0101697	0	0	0	0.0111988	0	0	0	0	0	0	0	0.0833123	0	0	0	0	0
Actinobacteria;Actinobacteria;Micrococcales;Microbacteriaceae;Rhodoluna;Ambiguous_taxa	0.0975393	0.0123568	0.287108	0.0059201	0	0	0	0	0.154672	0	0	0	0.0420092	0	0	0	0.0936846	0.0281613	0	0	0.0267741	0	0	0	0	0	0	0	0	0	0	0.0699167	0	0	0.0151833	0.0535052	0	0	0	0	0.0668048	0	0	0.0937263	0	0.00709426	0	0	0
Actinobacteria;Actinobacteria;Micrococcales;Microbacteriaceae;Rhodoluna;__	0	0	0	0.056833	0	0	0	0	0	0	0.14326	0	0	0	0	0	0	0	0	0	0	0	0	0	0	0	0	0	0	0	0	0	0	0	0	0	0	0	0	0	0	0	0	0	0	0	0	0	0
Actinobacteria;Actinobacteria;Micrococcales;Microbacteriaceae;Yonghaparkia;Ambiguous_taxa	0	0	0	0	0	0	0	0	0	0	0.0567071	0	0.0480106	0	0	0	0	0	0	0	0	0	0	0	0	0.0462566	0	0	0	0	0	0	0	0	0.0234651	0	0	0	0	0	0	0	0	0	0	0	0	0	0
Actinobacteria;Actinobacteria;Micrococcales;Microbacteriaceae;__;__	0	0	0	0	0	0	0	0	0	0	0	0	0	0	0	0	0.0165326	0	0	0.00411811	0.00698454	0	0	0	0	0.0136495	0	0	0	0	0.00904016	0	0	0.0371002	0	0	0.0765139	0	0	0	0	0	0	0	0	0	0	0	0
Actinobacteria;Actinobacteria;Micrococcales;Micrococcaceae;Arthrobacter;Ambiguous_taxa	0.217247	0	0.00607635	0.0331526	0	0	0	0	0	0	0.458134	0	0	0	0	0	0	0	0	0	0	0	0	0	0	0	0	0	0	0.0319654	0	0	0	0	0	0	0	0	0	0	0	0	0	0	0	0	0	0	0
Actinobacteria;Actinobacteria;Micrococcales;Micrococcaceae;Arthrobacter;__	0	0.00176526	0	0.0142082	0.027499	0	0	0.170263	0	0.0332711	0	0	0	0	0	0	0.0275543	0	0	0.0301995	0	0	0	0	0	0	0	0	0	0	0.0101702	0	0	0	0	0	0.0130634	0	0	0	0	0	0	0	0	0	0.00989315	0	0
Actinobacteria;Actinobacteria;Micrococcales;Micrococcaceae;Enteractinococcus;Actinomycetales bacterium SSCS15	0	0	0	0	0	0	0	0	0	0	0	0	0	0	0	0	0	0	0	0	0	0.0118443	0	0	0	0	0	0	0	0	0	0	0	0.0123667	0	0	0	0	0	0	0	0	0	0	0	0	0	0	0
Actinobacteria;Actinobacteria;Micrococcales;Micrococcaceae;Enteractinococcus;uncultured bacterium	0	0	0	0	0	0	0	0	0	0	0	0	0	0	0	0	0	0	0	0	0	0	0	0	0	0	0	0	0	0	0	0	0	0	0	0	0	0	0	0	0	0	0	0	0	0	0	0	0
Actinobacteria;Actinobacteria;Micrococcales;Micrococcaceae;Glutamicibacter;Ambiguous_taxa	0	0	0	0	0	0	0	0.0327429	0.154672	0.0230338	0	0.128989	0.0600132	0.0451747	0	0	0	0	0	0.0672624	0.0162973	0	0	0	0	0.00606644	0	0	0	0	0.0146903	0	0	0	0	0	0	0	0.0216036	0.0447463	0	0	0	0	0	0.0127697	0.0593589	0	0
Actinobacteria;Actinobacteria;Micrococcales;Micrococcaceae;Glutamicibacter;__	0	0	0	0	0.206242	0	0	0	0	0	0	0	0.0740163	0	0	0	0	0	0	0	0	0	0	0	0	0	0	0.0154618	0	0	0	0.0190682	0	0	0	0	0	0	0	0	0	0	0	0	0	0	0.00228304	0	0
Actinobacteria;Actinobacteria;Micrococcales;Micrococcaceae;Kocuria;Ambiguous_taxa	0	0	0	0	0	0	0	0	0	0	0	0	0	0	0	0	0	0.0478742	0	0	0	0	0	0	0	0	0	0	0	0	0	0	0	0	0.0179439	0	0	0.0690952	0	0	0	0	0	0	0	0	0	0	0
Actinobacteria;Actinobacteria;Micrococcales;Micrococcaceae;Kocuria;uncultured bacterium	0	0	0	0	0	0	0	0	0	0	0	0	0	0	0	0	0	0	0	0	0	0	0	0.00751004	0	0	0	0	0	0.0319654	0	0	0	0	0	0	0	0	0	0	0	0	0	0	0	0	0	0	0
Actinobacteria;Actinobacteria;Micrococcales;Micrococcaceae;Kocuria;uncultured marine bacterium	0	0	0	0	0	0	0	0	0	0	0	0	0	0	0	0	0	0	0	0	0	0	0	0	0	0	0	0	0	0	0	0	0	0	0	0	0	0	0	0	0	0	0	0	0	0	0	0	0
Actinobacteria;Actinobacteria;Micrococcales;Micrococcaceae;Kocuria;__	0	0	0	0	0	0	0	0	0	0	0	0	0	0	0	0	0	0	0	0	0.0151332	0	0	0	0	0	0	0	0	0	0	0	0	0	0	0	0	0	0	0	0.286062	0	0	0	0	0	0	0	0.0335777
Actinobacteria;Actinobacteria;Micrococcales;Micrococcaceae;Micrococcus;Ambiguous_taxa	0	0	0	0	0	0	0	0	0	0	0	0	0	0	0	0	0	0	0	0	0	0	0	0	0	0	0	0.011245	0	0	0	0	0	0	0	0	0	0	0	0	0	0	0	0	0	0	0	0	0
Actinobacteria;Actinobacteria;Micrococcales;Micrococcaceae;Micrococcus;__	0	0	0	0	0	0	0	0	0	0	0	0	0.254056	0	0	0	0	0	0	0	0.0139691	0	0	0	0	0	0	0	0	0	0	0.0559334	0.050408	0	0	0	0	0	0	0	0	0	0	0	0	0	0	0	0
Actinobacteria;Actinobacteria;Micrococcales;Micrococcaceae;Paenarthrobacter;__	0	0	0	0	0	0	0	0	0	0	0	0	0	0	0	0	0	0	0	0	0	0	0	0	0	0	0.02136	0	0	0	0	0	0	0	0	0	0	0	0	0	0	0	0	0	0	0	0	0	0
Actinobacteria;Actinobacteria;Micrococcales;Micrococcaceae;Paeniglutamicibacter;Ambiguous_taxa	0	0	0	0	0	0	0	0	0.0497795	0	0	0	0	0	0	0	0.0146956	0.0344976	0	0.0150997	0.0186254	0	0	0	0	0.0128912	0	0	0	0	0	0	0	0	0	0	0	0	0	0	0	0	0	0	0	0	0	0	0.0147414
Actinobacteria;Actinobacteria;Micrococcales;Micrococcaceae;Pseudoglutamicibacter;Ambiguous_taxa	0	0	0	0	0	0	0	0	0	0	0	0	0	0	0	0	0	0	0	0	0	0	0	0	0	0	0	0	0	0	0	0	0	0	0	0	0	0	0	0	0	0	0	0	0	0	0	0	0
Actinobacteria;Actinobacteria;Micrococcales;Micrococcaceae;Renibacterium;Ambiguous_taxa	0	0	0	0	0	0	0	0	0	0	0	0	0	0	0	0	0	0	0	0	0	0	0	0	0	0	0	0	0	0	0	0.00762728	0	0	0	0	0	0	0	0	0	0	0	0	0	0	0	0	0
Actinobacteria;Actinobacteria;Micrococcales;Micrococcaceae;Rothia;bacterium RUSp03-3	0	0	0	0	0	0	0	0	0	0	0.0164152	0	0.0940207	0	0	0	0	0	0	0	0	0	0	0	0	0	0	0	0	0	0	0	0	0	0	0	0	0	0	0	0.503606	0.0311721	0.0183927	0.127944	0.227126	0.048241	0	0.0421184	0
Actinobacteria;Actinobacteria;Micrococcales;Micrococcaceae;Yaniella;Ambiguous_taxa	0	0	0	0	0.183326	0	0	0.16044	0.200896	0	0.061184	0	0	0	0	0	0	0	0	0	0	0	0	0	0	0	0	0	0	0	0	0	0	0	0	0	0	0	0	0	0	0	0	0	0	0	0	0	0
Actinobacteria;Actinobacteria;Micrococcales;Micrococcaceae;__;__	0.0465529	0	0	0	0	0	0	0	0	0	0	0	0	0	0	0	0	0	0	0	0	0	0	0	0	0	0	0	0	0	0	0	0.025204	0	0	0	0	0	0	0	0.0531013	0	0	0.0431438	0	0	0	0	0
Actinobacteria;Actinobacteria;Micrococcales;Sanguibacteraceae;Sanguibacter;Ambiguous_taxa	0.10419	0	0	0	0.0412485	0	0	0	0	0	0	0.0211275	0	0.011712	0	0	0	0	0	0	0	0	0	0	0.0231864	0.00379153	0	0	0	0	0	0	0	0	0	0.0174203	0	0	0	0	0.0171294	0	0	0.00743859	0	0	0	0	0
Actinobacteria;Actinobacteria;Micrococcales;Sanguibacteraceae;Sanguibacter;uncultured bacterium	0	0	0	0	0	0	0	0	0	0	0	0.0289114	0	0	0	0	0	0	0	0	0	0	0	0	0	0	0	0	0.0051719	0	0	0	0	0	0	0	0	0	0	0	0	0	0	0	0	0	0	0	0
Actinobacteria;Actinobacteria;PeM15;Ambiguous_taxa;Ambiguous_taxa;Ambiguous_taxa	0	0	0	0	0	0	0	0	0	0	0	0	0	0	0	0	0.0422499	0.0865959	0	0.0356903	0.0360868	0	0	0	0.0355525	0	0.0335658	0.00913653	0.0232736	0.039342	0.0124302	0	0	0	0	0	0	0	0	0	0	0.0225132	0	0	0	0	0	0	0
Actinobacteria;Actinobacteria;PeM15;metagenome;metagenome;metagenome	0.00665041	0	0	0	0	0	0	0	0	0	0	0	0	0	0	0	0	0	0	0	0	0	0	0	0	0.00303322	0	0	0	0	0	0	0	0	0	0	0	0	0	0	0	0	0	0	0	0	0	0	0
Actinobacteria;Actinobacteria;PeM15;uncultured bacterium;uncultured bacterium;uncultured bacterium	0	0	0	0	0	0	0	0	0	0	0	0	0	0	0	0	0	0	0	0	0	0	0	0	0	0	0	0	0	0	0	0	0	0	0	0	0	0	0	0	0	0	0	0	0	0	0	0	0
Actinobacteria;Actinobacteria;PeM15;__;__;__	0	0	0	0	0	0	0	0.0360172	0	0	0	0	0	0	0	0	0	0	0	0	0	0	0	0	0	0	0	0	0	0	0	0	0.0409565	0	0	0	0.0354577	0	0	0	0	0	0	0	0	0	0	0	0
Actinobacteria;Actinobacteria;Propionibacteriales;Nocardioidaceae;Aeromicrobium;Nocardioides sp.	0	0	0	0	0	0	0	0	0	0	0	0	0	0	0	0	0	0	0	0	0	0	0	0	0	0	0	0	0	0	0	0	0	0	0	0	0	0	0	0	0	0	0	0	0	0	0	0	0
Actinobacteria;Actinobacteria;Propionibacteriales;Nocardioidaceae;Aeromicrobium;__	0	0	0	0.161027	0	0	0	0	0	0	0	0	0	0	0	0	0	0	0	0	0.0116409	0.00846024	0	0	0	0	0	0	0	0	0	0	0	0.0915139	0	0	0	0	0	0	0	0	0	0	0	0	0	0	0
Actinobacteria;Actinobacteria;Propionibacteriales;Nocardioidaceae;Nocardioides;Ambiguous_taxa	0	0	0	0	0	0	0	0	0	0	0	0	0	0	0	0	0.0220434	0	0	0	0	0	0	0	0	0	0	0	0	0	0	0	0	0	0	0	0	0	0	0	0	0	0	0	0	0	0	0	0
Actinobacteria;Actinobacteria;Propionibacteriales;Propionibacteriaceae;Acidipropionibacterium;Ambiguous_taxa	0	0	0	0	0	0	0	0	0	0	0	0	0	0	0	0	0	0.0352016	0.141606	0.0356903	0	0.0101523	0	0.0625837	0	0	0	0	0	0	0	0	0.0787625	0	0.0069015	0	0	0.0230317	0.0246898	0	0	0	0	0	0	0	0	0	0.0171983
Actinobacteria;Actinobacteria;Propionibacteriales;Propionibacteriaceae;Cutibacterium;Ambiguous_taxa	0	0	0	0	0	0	0	0	0	0	0	0	0	0	0	0	0	0.0197129	0	0	0	0.0203046	0	0	0	0	0	0	0	0	0	0.0483061	0.075612	0	0	0	0.0223943	0.00895679	0	0	0	0	0	0.0595088	0	0	0	0	0.0131035
Actinobacteria;Actinobacteria;Propionibacteriales;Propionibacteriaceae;Cutibacterium;uncultured Propionibacterium sp.	0	0	0.120008	0	0.105413	0	0	0	0	0.0473473	0	0	0	0	0	0	0	0	0.0283213	0.00686351	0	0	0	0	0	0	0	0	0	0.0147533	0.0124302	0	0	0	0.0358878	0	0	0	0	0	0	0	0	0	0	0	0	0	0.0171983
Actinobacteria;Actinobacteria;Propionibacteriales;Propionibacteriaceae;Cutibacterium;__	0	0	0	0	0	0	0	0	0	0	0	0	0	0	0	0	0	0	0	0	0	0	0	0	0	0	0	0	0	0	0	0	0	0	0	0	0	0	0	0	0	0	0	0	0	0	0	0	0
Actinobacteria;Actinobacteria;Propionibacteriales;Propionibacteriaceae;Friedmanniella;Ambiguous_taxa	0	0	0	0	0	0	0	0	0	0	0	0	0	0	0	0	0	0	0	0	0	0.0118443	0	0	0	0	0	0	0	0	0	0	0	0	0	0	0	0	0	0	0	0	0	0	0	0	0	0	0
Actinobacteria;Actinobacteria;Propionibacteriales;Propionibacteriaceae;Luteococcus;Ambiguous_taxa	0	0	0	0	0	0	0	0.203006	0	0	0	0	0	0	0	0	0	0	0	0	0	0	0	0	0	0	0.0183086	0	0	0	0	0	0	0	0	0	0	0	0	0	0	0	0	0	0	0	0	0	0
Actinobacteria;Actinobacteria;Propionibacteriales;Propionibacteriaceae;Propionibacterium;Ambiguous_taxa	0	0	0	0	0	0	0	0	0	0	0	0	0	0	0	0	0	0	0.0472021	0	0	0.0186125	0	0	0.0200949	0	0	0	0	0	0	0	0	0	0	0	0	0	0	0	0	0	0	0	0	0	0	0	0.0204742
Actinobacteria;Actinobacteria;Propionibacteriales;Propionibacteriaceae;Propionibacterium;Propionibacterium cyclohexanicum	0	0	0	0	0	0	0	0	0	0	0	0	0	0	0	0	0	0	0	0.0027454	0	0	0	0	0	0	0	0	0	0	0	0	0	0	0	0	0	0	0	0	0	0	0	0	0	0	0	0	0
Actinobacteria;Actinobacteria;Propionibacteriales;Propionibacteriaceae;Propionibacterium;uncultured bacterium	0	0	0	0	0	0	0	0	0	0	0	0	0	0	0	0	0	0	0	0	0	0	0	0	0	0	0	0	0	0	0	0	0	0	0	0	0	0	0	0	0	0	0	0	0	0	0	0	0
Actinobacteria;Actinobacteria;Propionibacteriales;Propionibacteriaceae;Propionibacterium;__	0	0	0	0	0	0	0	0	0	0	0	0	0	0	0	0	0.0238804	0.0464661	0.21949	0.05079	0.0873068	0.169205	0	0.205275	0	0	0.0091543	0	0	0	0	0	0	0.0148401	0.0869589	0	0.0279929	0.00767725	0	0	0	0	0	0	0	0	0	0	0.0384915
Actinobacteria;Actinobacteria;Propionibacteriales;Propionibacteriaceae;Propioniciclava;metagenome	0	0	0	0	0	0	0	0	0	0	0	0	0	0	0	0	0	0	0	0	0	0	0	0	0	0	0	0	0	0	0	0	0	0	0	0	0	0	0	0	0	0	0	0	0	0	0	0	0
Actinobacteria;Actinobacteria;Propionibacteriales;Propionibacteriaceae;Propioniciclava;uncultured bacterium	0	0	0	0	0	0	0	0	0	0	0	0	0	0	0	0	0	0	0	0	0	0.00846024	0	0	0	0	0	0	0	0	0	0	0	0	0	0	0	0	0	0	0	0	0	0	0	0	0	0	0
Actinobacteria;Actinobacteria;Propionibacteriales;Propionibacteriaceae;Pseudopropionibacterium;uncultured bacterium	0	0	0	0	0	0	0	0	0	0	0	0	0	0	0	0	0	0	0	0	0	0	0	0	0	0	0	0	0	0	0	0	0	0	0	0	0	0	0	0	0	0	0	0	0	0	0	0	0.026207
Actinobacteria;Actinobacteria;Propionibacteriales;Propionibacteriaceae;Tessaracoccus;Ambiguous_taxa	0	0	0	0	0	0	0	0.0622115	0	0.0870166	0.0164152	0	0	0	0	0	0	0	0	0.0164724	0	0	0	0	0	0	0	0	0	0	0	0	0	0	0	0.0298634	0	0	0	0	0	0	0	0	0	0	0.00304405	0	0
Actinobacteria;Actinobacteria;Propionibacteriales;Propionibacteriaceae;uncultured;unidentified marine bacterioplankton	0	0	0	0	0	0	0	0	0	0	0	0	0	0	0	0	0	0	0	0	0	0	0	0	0	0	0	0	0	0	0	0	0	0	0	0	0	0	0	0	0	0	0	0	0	0	0	0	0
Actinobacteria;Actinobacteria;Propionibacteriales;Propionibacteriaceae;__;__	0.113057	0	0	0	0	0	0	0	0	0	0	0.00555988	0	0	0	0	0	0	0	0	0	0	0	0	0	0	0	0	0	0	0	0	0	0	0	0	0	0	0	0	0	0	0	0	0	0	0	0	0
Actinobacteria;Actinobacteria;Pseudonocardiales;Pseudonocardiaceae;Ambiguous_taxa;Ambiguous_taxa	0.0354689	0	0	0	0	0	0	0	0	0	0	0	0	0	0	0	0	0	0	0	0	0	0	0	0	0	0	0	0	0	0	0	0	0	0	0	0	0	0	0	0	0	0	0.010414	0	0	0.00989315	0	0
Actinobacteria;Actinobacteria;Pseudonocardiales;Pseudonocardiaceae;Saccharopolyspora;Ambiguous_taxa	0	0	0	0.105378	0	0	0	0.0327429	0	0	0	0	0.166037	0.00836568	0	0	0	0	0	0	0	0	0	0	0	0	0	0	0	0	0	0	0	0.0791472	0	0.0385735	0	0.0345476	0	0.121078	0	0	0	0	0	0.00496598	0	0	0.0114655
Actinobacteria;Actinobacteria;Pseudonocardiales;Pseudonocardiaceae;Saccharopolyspora;Saccharopolyspora rectivirgula	0.0332521	0.00529577	0	0.00828814	0	0	0	0	0	0	0	0	0	0	0	0	0.0587825	0	0	0	0	0	0	0	0	0.00682475	0	0.00632529	0	0	0	0.00508485	0.031505	0.0420469	0	0	0.0223943	0	0.0123449	0	0	0	0	0.0357053	0	0	0	0	0
Actinobacteria;Actinobacteria;Pseudonocardiales;Pseudonocardiaceae;Saccharopolyspora;uncultured bacterium	0	0	0	0	0	0	0	0	0	0	0	0	0	0	0	0	0	0	0	0	0	0	0	0	0	0	0	0	0	0	0	0	0	0	0	0	0	0	0	0	0	0	0	0	0	0	0	0	0
Actinobacteria;Actinobacteria;Pseudonocardiales;Pseudonocardiaceae;Saccharopolyspora;__	0	0	0	0.0319686	0	0	0	0	0	0	0	0	0	0	0	0	0	0.0133766	0	0	0	0	0	0	0	0	0	0.0119478	0	0	0.0135602	0	0	0.0469936	0.0248454	0.016176	0	0.0435044	0.0370348	0	0	0	0	0	0	0.0198639	0	0	0
Actinobacteria;Actinobacteria;Streptomycetales;Streptomycetaceae;Streptomyces;__	0	0	0	0	0	0	0	0.147343	0	0	0.122368	0	0	0	0	0	0	0	0	0	0.0593686	0	0	0	0	0	0	0	0	0	0	0	0	0.0222601	0	0	0	0	0	0	0.0119906	0	0	0	0	0	0	0	0
Actinobacteria;Actinobacteria;Streptosporangiales;Nocardiopsaceae;Nocardiopsis;Ambiguous_taxa	0	0	0	0	0	0	0	0	0	0	0	0	0	0	0	0	0	0	0	0	0	0	0	0	0	0	0	0	0	0	0	0	0	0	0	0	0	0	0	0	0	0	0	0	0	0	0	0	0
Actinobacteria;Actinobacteria;Streptosporangiales;__;__;__	0	0	0	0	0	0	0	0	0	0	0	0	0	0	0	0	0	0	0	0	0	0	0	0	0	0	0	0	0	0	0	0	0	0	0	0	0	0	0	0	0	0	0	0	0	0	0	0	0
Actinobacteria;Coriobacteriia;Coriobacteriales;Atopobiaceae;Atopobium;__	0	0	0	0	0	0	0	0.00982286	0	0	0	0.00778383	0	0	0	0	0	0.0556185	0	0	0	0	0	0	0	0.00909966	0.01068	0.00281124	0	0.0098355	0	0	0	0	0	0	0	0	0	0	0	0	0	0	0	0	0	0	0
Actinobacteria;Coriobacteriia;Coriobacteriales;Atopobiaceae;Olsenella;Ambiguous_taxa	0	0.00264788	0	0.0201283	0	0	0	0	0	0	0	0	0	0	0	0	0	0.0105605	0	0	0	0	0	0.0050067	0	0	0	0	0	0	0.00791014	0	0.037806	0	0.0041409	0	0	0	0	0	0	0	0	0	0	0	0.00380506	0	0.00573277
Actinobacteria;Coriobacteriia;Coriobacteriales;Atopobiaceae;Olsenella;uncultured bacterium	0	0	0	0	0	0	0	0	0	0	0	0	0	0	0	0	0	0	0	0	0	0	0	0	0	0	0	0	0	0	0	0	0	0	0	0	0	0.00255908	0	0.0447463	0.063379	0	0	0	0	0	0	0	0
Actinobacteria;Coriobacteriia;Coriobacteriales;Atopobiaceae;__;__	0.0243848	0	0	0	0	0	0	0.0491143	0.078225	0.0153559	0.164152	0.0300234	0.0640141	0.0485209	0	0	0.0624564	0.0865959	0.0613627	0.0713805	0.00582045	0.0135364	0	0.0250335	0.0788339	0.12967	0.19224	0.0105421	0	0	0.055371	0.116952	0	0	0	0	0	0	0	0	0	0	0	0	0	0	0.00456607	0	0.00982761
Actinobacteria;Coriobacteriia;Coriobacteriales;Coriobacteriales Incertae Sedis;Raoultibacter;Raoultibacter massiliensis	0	0	0	0	0	0	0	0	0	0	0	0	0	0	0	0	0	0	0	0	0	0	0	0	0	0	0	0	0	0.00737663	0	0	0	0	0	0	0	0	0	0	0	0	0	0	0	0	0	0	0
Actinobacteria;Coriobacteriia;Coriobacteriales;Coriobacteriales Incertae Sedis;Raoultibacter;uncultured bacterium	0.310352	0	0	0	0	0	0	0.06876	0	0	0	0.00667186	0	0	0	0	0	0	0	0.0027454	0	0	0	0	0	0	0	0	0	0	0	0	0	0	0	0	0	0	0	0	0	0	0	0	0	0	0	0	0
Actinobacteria;Coriobacteriia;Coriobacteriales;Eggerthellaceae;Denitrobacterium;Eggerthellaceae bacterium AT8	0	0	0	0	0	0	0	0	0	0	0	0	0	0	0	0	0	0.00281613	0	0	0	0	0	0	0	0	0	0	0	0	0	0	0.025204	0	0	0	0	0.0179136	0	0.0210571	0	0	0	0	0	0	0	0	0
Actinobacteria;Coriobacteriia;Coriobacteriales;Eggerthellaceae;Enterorhabdus;uncultured bacterium	0	0	0	0	0	0	0	0	0	0	0	0	0	0	0	0	0	0	0	0	0	0	0	0	0	0	0	0	0	0	0	0	0	0	0	0	0	0	0	0	0	0	0	0	0	0	0	0	0
Actinobacteria;Coriobacteriia;Coriobacteriales;Eggerthellaceae;uncultured;metagenome	0.0576369	0.00970891	0.0820307	0.0876175	0	0	0	0	0.188451	0.0383897	0.26712	0.0177916	0.120026	0.103734	0	0	0.152467	0.366801	0.103845	0.126289	0.0849786	0.0389171	0	0.0813588	0.129844	0.0796221	0.0976458	0.0133534	0.0129298	0.0295065	0.057631	0.0826289	0	0	0	0.0199089	0.00373239	0	0	0	0	0	0	0	0	0	0	0	0.0270259
Actinobacteria;Coriobacteriia;OPB41;__;__;__	0	0	0	0	0	0	0	0	0	0	0	0	0	0	0	0	0	0	0	0	0	0	0	0	0	0	0	0	0	0	0	0	0	0	0	0	0	0	0	0.0421141	0	0	0	0	0	0	0	0	0
Actinobacteria;Coriobacteriia;__;__;__;__	0	0	0	0	0	0	0	0	0	0	0	0	0	0	0	0	0	0	0	0	0	0	0	0.00625837	0	0	0	0	0	0	0	0.0127121	0	0	0	0	0	0	0	0	0	0	0.00204363	0	0	0	0.00532708	0	0
Actinobacteria;Thermoleophilia;Solirubrobacterales;67-14;Ambiguous_taxa;Ambiguous_taxa	0	0	0	0	0	0	0	0	0	0	0	0	0	0	0	0	0	0	0	0	0	0	0	0	0	0	0	0	0	0	0	0	0	0	0	0	0	0	0	0	0	0	0	0	0	0	0	0	0
Armatimonadetes;Armatimonadia;Armatimonadales;Armatimonadaceae;Armatimonas;uncultured bacterium	0	0	0	0	0	0	0	0	0.243564	0	0	0	0	0	0	0	0	0	0	0	0	0	0	0	0	0	0	0	0.0129298	0	0	0	0	0	0	0	0	0	0	0.0263213	0	0	0	0	0.0103239	0	0	0	0
Bacteroidetes;Bacteroidia;Bacteroidales;Bacteroidaceae;Bacteroides;Ambiguous_taxa	0	0	0	0	0	0	0	0.0720343	0.325345	0.0998132	0.311889	0.0867341	0.236052	0.0234239	0	0	0	0.0112645	0	0.0219632	0.0116409	0	0	0	0	0.0128912	0	0	0	0	0.0316406	0	0	0	0	0.0335963	0	0	0	0.0263213	0	0	0	0.0119018	0	0	0	0	0.0343966
Bacteroidetes;Bacteroidia;Bacteroidales;Bacteroidaceae;Bacteroides;uncultured bacterium	0	0	0	0	0	0	0	0.0589372	0	0	0	0	0	0.0301165	0	0	0.0110217	0.022529	0	0	0	0	0	0	0	0	0.105274	0.011245	0	0	0.0203404	0	0	0	0	0	0	0	0	0	0.0753696	0	0	0	0	0	0	0	0
Bacteroidetes;Bacteroidia;Bacteroidales;Bacteroidaceae;Bacteroides;uncultured marine bacterium	0.0199512	0	0.0531681	0	0	0	0	0	0	0.0652625	0.0298458	0.0222395	0.0460101	0.011712	0	0	0.0973585	0.276685	0.129806	0.13727	0.150168	0.0507614	0	0.0413052	0.148393	0.147111	0.198343	0.0288152	0.0193946	0.0639308	0.229394	0.0661031	0	0.0840939	0	0	0	0	0	0	0	0	0	0	0	0	0	0	0.024569
Bacteroidetes;Bacteroidia;Bacteroidales;Bacteroidaceae;Bacteroides;__	0	0	0	0.0367046	0	0	0	0	0.19734	0.174033	0.11043	0.269098	0.0660145	0.123812	0	0	0.113891	0.317518	0.118005	0.126289	0.0593686	0.118443	0	0.0475636	0.13139	0.332896	0.238012	0.00773091	0.0142227	0.100814	0.220354	0.142376	0	0.103881	0	0	0	0	0.0246898	0	0	0	0.0102182	0.0267789	0	0.0113508	0.00684911	0	0.050776
Bacteroidetes;Bacteroidia;Bacteroidales;Dysgonomonadaceae;Dysgonomonas;__	0	0	0	0	0	0	0	0	0	0	0	0	0	0	0	0	0	0	0	0	0	0	0	0	0	0	0	0	0	0	0	0	0	0	0	0	0	0	0	0	0	0	0	0	0	0	0	0	0
Bacteroidetes;Bacteroidia;Bacteroidales;Marinifilaceae;Marinifilum;Marinifilum sp. 4SWWS2-6	0	0	0	0	0	0	0	0	0	0	0	0	0	0	0	0	0.0183695	0.0239371	0.0259612	0.0123543	0.00465636	0.00676819	0	0	0.00927457	0.0796221	0.0518743	0.0196787	0	0.019671	0.0282505	0.0127121	0	0	0	0	0	0	0	0	0	0	0	0	0	0	0	0	0.0131035
Bacteroidetes;Bacteroidia;Bacteroidales;Marinifilaceae;Marinifilum;uncultured bacterium	0	0	0	0	0	0	0	0	0	0	0	0	0	0.00334627	0	0	0	0	0	0	0	0	0	0.0112651	0	0	0	0	0	0	0	0.0114409	0	0	0	0	0	0	0	0	0	0	0	0	0	0	0	0	0
Bacteroidetes;Bacteroidia;Bacteroidales;Marinifilaceae;Odoribacter;Ambiguous_taxa	0	0	0	0	0	0	0	0	0	0	0	0	0	0	0	0	0	0	0	0	0	0	0	0	0	0	0	0	0	0	0	0	0	0	0	0	0	0	0	0	0	0	0	0	0	0	0	0	0
Bacteroidetes;Bacteroidia;Bacteroidales;Marinifilaceae;Odoribacter;__	0	0	0	0	0	0	0	0.340526	0.0266676	0	0.126845	0.00889581	0	0	0	0	0	0	0	0.013727	0.02561	0	0	0	0.00927457	0	0.00457715	0	0	0	0.0248604	0.00762728	0	0	0	0	0	0	0	0	0	0	0	0	0	0	0	0	0
Bacteroidetes;Bacteroidia;Bacteroidales;Marinifilaceae;uncultured;Ambiguous_taxa	0	0	0	0	0	0	0	0	0	0	0	0	0	0	0	0	0	0	0	0	0.00349227	0	0	0	0	0	0	0	0	0	0	0	0	0	0	0	0	0	0	0	0	0	0	0	0	0	0	0	0
Bacteroidetes;Bacteroidia;Bacteroidales;Marinifilaceae;uncultured;uncultured bacterium	0	0	0	0	0	0	0	0	0	0	0	0	0	0	0	0	0	0	0	0	0	0	0	0	0	0	0	0	0	0	0	0	0	0	0	0	0	0	0	0	0	0	0	0	0	0	0	0	0.0335777
Bacteroidetes;Bacteroidia;Bacteroidales;Marinifilaceae;__;__	0	0	0	0	0	0	0	0	0	0	0	0	0	0	0	0	0	0	0	0	0	0	0	0	0	0	0	0	0	0	0	0	0	0	0	0	0	0	0	0	0	0	0	0	0	0	0	0	0
Bacteroidetes;Bacteroidia;Bacteroidales;Paludibacteraceae;Paludibacter;uncultured Bacteroidetes bacterium	0	0	0	0	0	0	0	0	0	0	0	0	0	0	0	0	0	0	0	0	0	0	0	0	0	0	0	0	0	0	0	0	0	0	0	0	0	0	0	0	0	0	0	0	0	0	0	0	0
Bacteroidetes;Bacteroidia;Bacteroidales;Paludibacteraceae;uncultured;uncultured Bacteroidetes bacterium	0	0	0	0	0	0	0	0	0	0	0	0	0	0	0	0	0	0	0.0708031	0	0	0	0	0	0.0386441	0.00834136	0.0335658	0	0	0	0.0169503	0.00762728	0	0	0	0	0	0	0	0	0	0	0	0	0	0	0	0	0
Bacteroidetes;Bacteroidia;Bacteroidales;Paludibacteraceae;uncultured;__	0	0	0	0	0	0	0	0	0	0	0	0	0	0	0	0	0	0	0	0	0	0	0	0	0	0	0	0	0	0	0	0	0	0	0	0	0	0	0	0	0	0	0	0	0	0	0	0	0
Bacteroidetes;Bacteroidia;Bacteroidales;Porphyromonadaceae;Porphyromonas;uncultured bacterium	0	0	0	0	0	0	0	0	0	0	0	0	0	0	0	0	0	0	0	0	0	0	0	0	0	0	0	0	0	0	0	0	0	0	0	0	0	0	0	0	0	0	0	0	0	0	0	0	0
Bacteroidetes;Bacteroidia;Bacteroidales;Prevotellaceae;Prevotella 7;Ambiguous_taxa	0	0	0	0	0	0	0	0	0	0.0307117	0.30592	0	0	0.148909	0	0	0	0.0415379	0	0.0027454	0	0.0219966	0	0	0	0.0439817	0	0	0.0129298	0	0.0113002	0	0	0	0.0814377	0.164249	0	0.0409453	0.0216036	0.0526427	0	0	0	0	0	0	0	0	0
Bacteroidetes;Bacteroidia;Bacteroidales;Prevotellaceae;Prevotella 7;uncultured bacterium	0	0	0	0	0	0	0	0	0	0.0716607	0.0164152	0.165684	0.082018	0.0401553	0	0	0	0	0.0141606	0	0.00698454	0	0	0.0175234	0	0	0	0	0	0	0	0	0	0	0	0	0	0	0.0740695	0	0	0	0	0	0	0	0	0	0.0982761
Bacteroidetes;Bacteroidia;Bacteroidales;Prevotellaceae;Prevotella 7;uncultured rumen bacterium	0	0	0	0	0	0	0	0	0	0	0	0	0	0	0	0	0	0	0	0	0	0	0	0	0.00927457	0.0204742	0.100697	0	0.0426682	0	0	0	0.119719	0.534244	0.36992	0.370804	0.0429225	0.133072	0.305537	0.344809	0.0137036	0	0	0.0565333	0	0	0	0	0
Bacteroidetes;Bacteroidia;Bacteroidales;Prevotellaceae;Prevotella 7;__	0	0	0	0	0	0	0	0	0	0	0	0	0	0	0	0	0	0	0	0	0	0.0186125	0	0	0	0	0	0	0	0	0	0.0673743	0.132321	0.163241	0	0.236418	0.0111972	0	0.0648108	0.0289535	0	0	0	0.0490947	0	0	0	0	0
Bacteroidetes;Bacteroidia;Bacteroidales;Prevotellaceae;Prevotella 9;Ambiguous_taxa	0	0	0	0	0	0	0	0	0	0	0	0	0.0220048	0	0	0	0	0	0.023601	0	0.012805	0	0	0	0.0463729	0.00758305	0.0335658	0	0	0	0	0.0292379	0.037806	0	0	0.0211532	0	0.0294295	0	0.144767	0	0	0	0.0252912	0	0	0	0	0.0966381
Bacteroidetes;Bacteroidia;Bacteroidales;Prevotellaceae;Prevotella 9;wallaby gut metagenome	0	0	0	0	0	0	0	0	0	0	0	0	0	0	0	0	0	0	0	0	0	0.00676819	0	0	0	0	0	0	0	0	0	0	0	0	0	0	0	0	0	0	0	0	0	0	0	0	0	0	0
Bacteroidetes;Bacteroidia;Bacteroidales;Prevotellaceae;Prevotella 9;__	0	0	0	0	0	0	0	0	0	0.101093	0.0149229	0.157901	0	0	0	0	0	0	0	0	0.00814863	0	0	0	0	0	0	0.00351405	0	0.00491775	0	0	0.179578	0.098934	0.222228	0.209044	0.181021	0.0626975	0.182088	0.118446	0	0	0	0.0342175	0	0	0	0	0.0646984
Bacteroidetes;Bacteroidia;Bacteroidales;Prevotellaceae;Prevotella;__	0	0	0	0	0	0	0	0	0	0	0	0	0	0	0	0	0	0	0	0	0	0	0	0	0	0	0	0	0	0	0	0	0	0	0	0	0	0	0	0	0	0	0	0	0	0	0	0	0.104009
Bacteroidetes;Bacteroidia;Bacteroidales;Prevotellaceae;Prevotellaceae UCG-001;uncultured bacterium	0	0	0	0	0	0	0	0	0	0	0	0	0	0	0	0	0	0	0	0	0	0	0	0	0	0	0	0	0	0	0	0	0	0	0	0	0	0	0	0	0	0	0	0	0	0	0	0	0
Bacteroidetes;Bacteroidia;Bacteroidales;Prevotellaceae;__;__	0	0	0	0	0	0	0	0	0	0	0	0	0	0	0	0	0	0	0	0	0	0	0	0	0.00618305	0	0	0	0	0	0	0	0	0	0	0.0149317	0	0	0	0	0	0	0	0	0	0	0	0	0
Bacteroidetes;Bacteroidia;Bacteroidales;Prolixibacteraceae;BSV13;uncultured bacterium	0	0	0	0	0	0	0	0	0	0	0	0	0	0	0	0	0	0	0	0	0	0	0	0	0	0	0	0	0	0	0	0	0	0	0	0	0	0	0	0	0	0	0	0	0	0	0	0	0
Bacteroidetes;Bacteroidia;Bacteroidales;Prolixibacteraceae;Roseimarinus;Ambiguous_taxa	0	0	0	0	0	0	0	0	0	0	0	0	0	0	0	0	0	0	0	0	0	0	0	0	0	0	0	0	0	0	0	0	0	0	0	0	0	0	0	0	0	0	0	0	0	0	0	0	0
Bacteroidetes;Bacteroidia;Bacteroidales;Rikenellaceae;Rikenella;uncultured bacterium	0	0	0	0	0	0	0	0	0	0.0115169	0	0.0266874	0	0	0	0	0	0	0	0	0	0	0	0	0.00772881	0	0	0	0	0	0.0339006	0	0	0	0	0	0	0	0	0	0	0	0	0	0	0	0	0	0
Bacteroidetes;Bacteroidia;Bacteroidales;Rikenellaceae;Rikenellaceae RC9 gut group;uncultured bacterium	0	0	0	0	0	0	0	0	0	0	0	0	0	0	0	0	0.0110217	0	0	0	0	0	0	0	0	0	0	0	0	0	0	0	0	0	0	0	0	0	0	0	0	0	0	0	0	0	0	0	0
Bacteroidetes;Bacteroidia;Bacteroidales;uncultured;Ambiguous_taxa;Ambiguous_taxa	0	0	0	0	0	0	0	0	0	0	0	0	0	0	0	0	0	0	0	0	0	0	0	0	0	0	0	0	0	0	0	0	0	0	0	0	0	0	0	0	0	0	0	0	0	0	0	0	0.0704312
Bacteroidetes;Bacteroidia;Bacteroidales;__;__;__	0	0	0	0	0	0	0	0	0	0	0	0	0	0	0	0	0	0	0	0.0109816	0	0	0	0	0.0432813	0	0.0091543	0	0	0	0.057631	0	0	0	0	0	0	0	0	0	0	0	0	0	0	0	0	0	0
Bacteroidetes;Bacteroidia;Chitinophagales;37-13;metagenome;metagenome	0	0	0	0	0	0	0	0.0884057	0.122671	0	0	0	0	0	0	0	0	0	0	0	0	0	0	0	0	0.0288156	0	0	0	0	0	0	0	0	0	0	0	0	0	0	0	0	0	0	0	0.00425656	0	0	0
Bacteroidetes;Bacteroidia;Chitinophagales;Chitinophagaceae;Ferruginibacter;__	0	0	0	0	0	0	0	0.0622115	0	0	0.12386	0	0	0	0	0	0	0	0	0	0	0.00676819	0	0	0	0	0	0	0	0	0	0	0	0	0	0	0	0	0	0	0	0	0	0	0	0.00567541	0	0	0
Bacteroidetes;Bacteroidia;Chitinophagales;Chitinophagaceae;Sediminibacterium;Ambiguous_taxa	0	0	0	0	0	0	0	0	0	0	0	0	0	0	0	0	0	0	0	0	0	0	0	0	0	0	0	0	0	0	0	0	0	0	0	0	0	0	0	0	0	0	0	0	0	0	0	0	0
Bacteroidetes;Bacteroidia;Chitinophagales;Chitinophagaceae;Sediminibacterium;uncultured bacterium	0	0	0	0.195363	0	0	0	0	0	0	0	0	0	0	0	0	0	0	0	0	0	0	0	0.0100134	0	0	0	0	0	0	0	0	0	0	0	0.0136874	0	0	0	0	0	0	0	0	0	0	0	0	0
Bacteroidetes;Bacteroidia;Chitinophagales;Chitinophagaceae;Segetibacter;__	0.0620705	0.00264788	0	0	0	0	0	0	0	0	0	0	0	0	0	0	0	0	0	0	0	0	0	0	0	0	0	0	0	0	0	0	0	0	0	0	0	0	0	0	0	0	0	0	0	0	0	0	0
Bacteroidetes;Bacteroidia;Chitinophagales;Chitinophagaceae;Terrimonas;uncultured bacterium	0	0	0	0.0343366	0	0	0	0	0	0	0	0	0	0	0	0	0	0	0	0	0	0	0	0	0	0	0	0	0	0	0	0	0	0	0	0	0	0	0	0	0	0	0	0	0.0206478	0	0	0	0
Bacteroidetes;Bacteroidia;Chitinophagales;Chitinophagaceae;Terrimonas;__	0	0	0	0	0	0	0	0	0	0	0	0	0	0	0	0	0	0	0.00708031	0	0	0	0	0	0	0	0	0	0	0	0	0	0	0	0	0	0	0	0	0	0	0	0	0	0	0	0	0	0
Bacteroidetes;Bacteroidia;Chitinophagales;Chitinophagaceae;uncultured;metagenome	0.0399025	0.00264788	0	0.117218	0.0870801	0	0	0.0261943	0.220452	0.0204745	0.096999	0	0	0	0	0	0.0110217	0.123206	0	0	0.0279382	0	0	0.0112651	0.0247322	0.00379153	0.0167829	0	0.00905083	0.00491775	0	0	0.12917	0.056887	0.027606	0	0.00746478	0	0.00925869	0	0.0376848	0	0	0	0.405214	0.0170262	0.00456607	0	0.0974571
Bacteroidetes;Bacteroidia;Chitinophagales;Chitinophagaceae;uncultured;uncultured bacterium	0.011084	0	0	0.166947	0	0	0	0.0622115	0	0	0	0	0	0.0602329	0	0	0	0	0	0	0	0	0	0	0	0.00682475	0	0	0	0.0122944	0	0	0	0	0.0593529	0.0186646	0	0	0	0	0	0	0	0	0	0.0134791	0	0	0
Bacteroidetes;Bacteroidia;Chitinophagales;Chitinophagaceae;uncultured;wastewater metagenome	0	0	0	0	0.233741	0	0	0	0	0.0166355	0.0149229	0	0	0.011712	0	0	0	0	0	0	0	0	0	0	0	0	0	0	0	0	0	0	0	0	0	0	0	0	0	0	0	0	0	0	0.0180668	0	0	0	0.0024569
Bacteroidetes;Bacteroidia;Chitinophagales;Chitinophagaceae;uncultured;__	0	0	0	0	0	0	0	0	0	0	0	0	0	0	0	0	0	0	0	0	0	0	0	0	0	0	0	0	0	0	0	0	0	0	0	0	0	0	0	0.0105285	0	0	0	0	0	0	0	0	0
Bacteroidetes;Bacteroidia;Chitinophagales;Chitinophagaceae;__;__	0	0.0114742	0	0	0	0	0	0	0	0	0	0	0	0	0	0	0	0	0	0	0	0	0	0	0	0	0	0	0	0	0	0	0	0	0	0	0	0	0	0	0	0	0	0	0	0	0	0	0
Bacteroidetes;Bacteroidia;Chitinophagales;Saprospiraceae;Aureispira;uncultured Bacteroidetes bacterium	0	0	0	0	0	0	0	0	0	0	0	0	0	0	0	0	0	0	0	0	0	0	0	0	0	0	0	0	0	0	0	0.035594	0	0	0	0	0	0	0	0	0	0	0	0	0	0	0	0	0
Bacteroidetes;Bacteroidia;Chitinophagales;Saprospiraceae;Aureispira;__	0	0	0	0	0	0	0	0	0	0	0	0	0	0	0	0	0	0	0	0	0	0	0	0	0	0	0	0	0	0	0	0	0	0	0	0	0	0	0	0	0	0	0	0	0	0	0	0	0.0393104
Bacteroidetes;Bacteroidia;Chitinophagales;Saprospiraceae;Phaeodactylibacter;metagenome	0	0	0	0	0	0	0	0	0	0.0115169	0	0	0	0	0	0	0	0	0	0	0	0	0	0	0	0	0	0	0	0	0	0	0	0	0	0	0	0	0	0	0	0	0	0	0	0	0	0	0
Bacteroidetes;Bacteroidia;Chitinophagales;Saprospiraceae;uncultured;Ambiguous_taxa	0	0	0	0	0	0	0	0	0	0	0	0	0	0	0	0	0	0	0	0	0	0	0	0	0	0	0	0	0	0	0	0	0	0	0	0	0	0	0	0	0	0	0	0	0	0	0	0	0
Bacteroidetes;Bacteroidia;Chitinophagales;Saprospiraceae;uncultured;metagenome	0	0	0	0	0	0	0	0	0	0	0	0	0	0	0	0	0	0	0	0	0	0	0	0	0	0	0	0	0	0.019671	0	0	0	0	0	0	0	0	0	0	0	0	0	0	0	0	0	0	0
Bacteroidetes;Bacteroidia;Chitinophagales;Saprospiraceae;uncultured;uncultured Sphingobacteriia bacterium	0	0	0	0	0	0	0	0	0	0	0	0	0	0	0	0	0	0	0	0	0	0	0	0	0	0	0	0	0	0	0	0	0	0.0346269	0	0	0	0	0	0	0	0	0	0	0	0	0	0	0
Bacteroidetes;Bacteroidia;Chitinophagales;Saprospiraceae;uncultured;uncultured bacterium	0	0	0.0136718	0	0	0	0	0.0654857	0.135116	0	0.0193998	0.0689425	0	0.0435015	0	0	0.0165326	0.0021121	0	0.00960892	0.0279382	0	0	0.0225301	0	0.00151661	0	0.0133534	0	0	0	0.00508485	0.018903	0.380896	0	0.104522	0	0.0435044	0	0.0842283	0.152452	0	0	0.0223158	0	0	0.0129372	0	0.0221121
Bacteroidetes;Bacteroidia;Chitinophagales;Saprospiraceae;uncultured;__	0	0	0	0.24154	0	0	0	0	0	0	0	0	0.106023	0	0	0	0	0	0	0	0.00349227	0	0	0	0	0	0	0	0	0	0	0.0127121	0	0	0	0	0	0	0	0	0	0	0	0	0.0696864	0	0	0	0
Bacteroidetes;Bacteroidia;Chitinophagales;Saprospiraceae;__;__	0	0	0	0.0189443	0	0	0	0	0	0	0	0	0	0	0	0	0	0	0	0	0	0	0	0	0	0	0	0	0	0	0	0.017797	0	0	0	0	0	0	0	0.0605391	0	0	0	0	0	0	0	0	0
Bacteroidetes;Bacteroidia;Chitinophagales;uncultured;metagenome;metagenome	0.0642873	0.0158873	0	0	0	0	0	0	0.0177784	0.0140762	0	0	0	0	0	0	0.0330651	0	0	0	0.0116409	0	0	0.0250335	0.0231864	0	0	0	0	0.0368831	0	0	0	0.126141	0	0	0.00746478	0	0	0.0368499	0.0137036	0	0	0	0	0.0163168	0	0.00679329	0
Bacteroidetes;Bacteroidia;Chitinophagales;uncultured;uncultured bacterium;uncultured bacterium	0	0	0	0.0367046	0	0	0	0.0196457	0	0	0.0522302	0	0	0	0	0	0	0	0	0	0	0	0	0	0	0	0	0	0	0	0	0.0203394	0	0	0.0041409	0.00373292	0	0	0	0.0263213	0	0	0	0.0163649	0	0.0113508	0	0	0.0049138
Bacteroidetes;Bacteroidia;Chitinophagales;uncultured;__;__	0	0	0	0	0	0	0	0	0	0	0	0	0.0900198	0	0	0	0	0	0	0	0.012805	0	0	0	0	0	0	0	0	0	0	0	0	0	0	0	0	0	0	0	0	0	0	0	0	0	0.00304405	0	0
Bacteroidetes;Bacteroidia;Chitinophagales;__;__;__	0	0	0	0	0	0	0	0	0	0	0	0	0	0	0	0	0	0	0	0	0	0	0	0	0.0309152	0	0	0	0	0	0	0	0	0	0	0	0.0205281	0	0	0	0	0	0	0	0	0	0	0	0
Bacteroidetes;Bacteroidia;Cytophagales;Cyclobacteriaceae;Marinoscillum;uncultured marine bacterium	0	0	0	0	0	0	0	0	0	0	0	0	0	0	0	0	0	0	0	0	0	0	0	0	0	0	0	0	0	0	0	0	0	0	0	0	0	0	0	0	0	0	0	0	0	0	0	0	0
Bacteroidetes;Bacteroidia;Cytophagales;Cyclobacteriaceae;uncultured;uncultured bacterium	0	0	0	0	0	0	0	0	0	0	0	0	0	0	0	0	0	0	0	0	0	0	0	0.0112651	0	0	0	0	0	0	0	0	0	0	0	0	0	0	0	0	0	0	0	0	0	0	0	0	0
Bacteroidetes;Bacteroidia;Cytophagales;Cyclobacteriaceae;__;__	0	0	0	0	0	0	0	0	0	0	0	0	0	0	0	0	0	0	0	0.0192178	0	0	0	0	0	0	0	0	0	0	0	0	0	0	0	0	0	0	0	0	0	0	0	0	0.0619435	0	0	0	0
Bacteroidetes;Bacteroidia;Cytophagales;Cytophagaceae;Cytophaga;Ambiguous_taxa	0	0	0	0.0165763	0	0	0	0	0	0	0	0	0	0	0	0	0	0	0	0	0	0	0	0	0	0	0	0	0	0	0	0	0	0	0	0	0	0	0	0	0	0	0	0	0	0	0	0	0
Bacteroidetes;Bacteroidia;Cytophagales;Cytophagaceae;Cytophaga;__	0	0	0	0	0	0	0	0	0	0	0	0	0	0	0	0	0	0	0	0	0	0	0	0	0	0	0	0	0	0	0	0	0	0	0	0	0	0	0	0	0	0	0	0	0	0	0	0	0
Bacteroidetes;Bacteroidia;Cytophagales;Hymenobacteraceae;Hymenobacter;Hymenobacter sp. DK6-66	0	0	0	0	0	0	0	0	0	0	0	0	0	0	0	0	0	0	0	0.013727	0	0	0	0	0	0	0	0	0	0	0	0	0	0	0	0	0	0	0	0	0	0	0	0	0	0	0	0	0
Bacteroidetes;Bacteroidia;Cytophagales;Hymenobacteraceae;Hymenobacter;uncultured bacterium	0	0	0	0	0	0	0	0	0	0	0	0	0	0	0	0	0	0.0359056	0	0.0219632	0	0	0	0	0	0.00758305	0.0183086	0	0	0	0.0124302	0	0	0	0	0	0	0.131793	0	0	0.00856472	0	0	0	0	0	0	0	0.00163793
Bacteroidetes;Bacteroidia;Cytophagales;Hymenobacteraceae;Hymenobacter;__	0	0	0	0	0	0	0	0	0	0	0	0	0	0	0	0	0	0	0	0	0	0	0	0	0	0	0	0	0	0	0	0	0	0.0643071	0	0.0373292	0	0	0	0	0	0	0	0	0	0	0	0	0
Bacteroidetes;Bacteroidia;Cytophagales;MWH-CFBk5;uncultured compost bacterium;uncultured compost bacterium	0	0	0	0	0	0	0	0	0	0	0	0	0	0	0	0	0	0	0	0	0	0	0	0	0	0	0	0	0	0	0	0	0	0.0098934	0.0027606	0	0	0	0	0	0	0	0	0	0	0	0	0	0
Bacteroidetes;Bacteroidia;Cytophagales;Microscillaceae;uncultured;metagenome	0	0	0	0	0	0	0	0	0	0	0.010446	0	0	0	0	0	0	0	0	0	0	0	0	0	0	0	0	0	0	0	0	0	0	0	0	0	0	0	0	0	0	0	0	0	0	0	0	0	0
Bacteroidetes;Bacteroidia;Cytophagales;Microscillaceae;uncultured;uncultured Flexibacter sp.	0	0	0	0.0307845	0	0	0	0	0	0	0	0	0	0	0	0	0	0	0	0	0	0	0	0	0	0	0	0	0	0	0	0	0	0	0	0	0	0	0	0.0342177	0	0	0	0	0	0	0	0	0
Bacteroidetes;Bacteroidia;Cytophagales;Microscillaceae;uncultured;uncultured bacterium	0	0	0	0	0	0	0	0	0	0	0	0	0	0	0	0	0	0	0	0	0	0	0	0	0	0	0	0	0	0	0	0	0	0	0	0	0	0	0	0	0.0565272	0	0	0	0	0	0	0	0
Bacteroidetes;Bacteroidia;Cytophagales;Microscillaceae;uncultured;__	0	0	0	0	0	0	0	0	0	0	0	0	0	0	0	0	0	0	0	0	0	0	0	0	0	0	0	0	0	0	0	0	0	0	0	0	0	0	0	0	0	0	0	0	0	0	0	0	0
Bacteroidetes;Bacteroidia;Cytophagales;Spirosomaceae;Arcicella;uncultured bacterium	0	0	0	0	0	0	0	0	0	0	0	0	0	0	0	0	0	0	0	0	0	0	0	0	0	0	0	0	0	0	0	0	0	0	0	0	0	0	0	0	0	0	0	0	0	0	0	0	0
Bacteroidetes;Bacteroidia;Cytophagales;Spirosomaceae;Dyadobacter;Ambiguous_taxa	0	0	0	0	0	0	0	0	0	0	0	0	0	0	0	0	0	0	0	0	0.02561	0	0	0	0	0	0	0	0.00775785	0.00737663	0	0	0	0	0	0.00622154	0	0	0	0.0342177	0	0	0	0	0	0	0	0	0
Bacteroidetes;Bacteroidia;Cytophagales;Spirosomaceae;Dyadobacter;__	0	0	0	0	0	0	0	0	0	0	0	0	0	0	0	0	0	0	0	0.0192178	0	0.00507614	0	0	0	0	0	0	0	0	0	0	0.025204	0	0	0	0	0	0	0	0	0	0	0	0	0	0	0	0
Bacteroidetes;Bacteroidia;Cytophagales;Spirosomaceae;Emticicia;uncultured bacterium	0	0	0	0	0	0	0	0	0.00711136	0	0	0	0	0	0	0	0	0	0	0	0	0	0	0	0	0	0	0	0	0	0	0	0	0	0	0	0	0	0	0	0	0	0	0	0	0	0	0	0
Bacteroidetes;Bacteroidia;Cytophagales;Spirosomaceae;Flectobacillus;Ambiguous_taxa	0	0	0	0	0	0	0	0	0	0	0	0	0	0	0	0	0	0	0	0	0	0	0	0	0	0	0	0	0	0	0	0	0	0	0	0	0	0	0	0	0	0	0	0	0	0	0	0	0
Bacteroidetes;Bacteroidia;Cytophagales;Spirosomaceae;Lacihabitans;uncultured bacterium	0	0	0	0	0	0	0	0	0.0835585	0	0	0	0	0	0	0	0	0.00774435	0	0	0	0	0	0.0187751	0	0	0	0	0	0	0	0	0.012602	0	0.0082818	0	0	0.108761	0	0	0	0	0	0.0178526	0	0	0.00608809	0	0
Bacteroidetes;Bacteroidia;Cytophagales;Spirosomaceae;Pseudarcicella;Ambiguous_taxa	0.243848	0	0.0653208	0	0	0	0	0.163714	0	0.00767794	0	0.0978539	0.032007	0	0	0	0	0.26542	0	0.00960892	0.0186254	0	0	0	0.0293695	0.00985797	0	0	0.0323244	0.019671	0	0.0305091	0.044107	0	0.0041409	0.102033	0	0	0	0.0368499	0	0	0	0.0357053	0.0748484	0	0.0129372	0	0.121207
Bacteroidetes;Bacteroidia;Cytophagales;Spirosomaceae;Rudanella;Ambiguous_taxa	0	0	0	0	0	0	0	0	0	0	0	0	0	0.0284433	0	0	0	0	0	0	0	0	0	0	0	0	0	0	0	0	0	0	0	0	0	0	0	0	0	0	0	0	0	0	0	0	0	0	0
Bacteroidetes;Bacteroidia;Cytophagales;Spirosomaceae;uncultured;Ephemera danica	0	0	0	0	0	0	0	0	0	0	0	0	0	0	0	0	0.0128587	0	0	0	0	0	0	0.0337952	0	0	0.00610286	0	0	0	0	0	0	0	0	0	0	0	0	0	0	0	0	0.0223158	0	0	0	0	0
Bacteroidetes;Bacteroidia;Cytophagales;Spirosomaceae;__;__	0	0	0	0	0	0	0	0	0	0	0	0	0	0	0	0	0	0	0	0	0	0	0	0	0	0	0	0	0	0	0	0.0101697	0	0	0	0	0	0.0537407	0	0	0	0	0	0	0	0	0	0	0
Bacteroidetes;Bacteroidia;Cytophagales;__;__;__	0	0	0	0	0	0	0	0	0	0	0	0	0	0	0	0	0	0	0	0	0	0	0	0	0	0	0	0	0	0	0	0	0	0	0	0	0	0	0	0.0289535	0	0	0	0	0	0	0	0	0
Bacteroidetes;Bacteroidia;Flavobacteriales;Crocinitomicaceae;Fluviicola;Ambiguous_taxa	0.0155176	0	0	0	0	0	0	0	0.0533352	0	0	0	0.0660145	0	0	0	0	0	0	0.013727	0	0	0	0	0	0	0	0	0	0	0	0	0	0	0	0	0	0	0	0	0.0222683	0	0	0	0	0	0	0	0
Bacteroidetes;Bacteroidia;Flavobacteriales;Crocinitomicaceae;Fluviicola;Flavobacteriia bacterium 40-80	0	0	0	0	0	0	0	0	0	0	0	0	0	0	0	0	0	0	0	0	0	0	0	0	0	0	0	0	0	0	0	0	0	0	0	0	0	0	0	0	0	0	0	0	0	0	0	0	0
Bacteroidetes;Bacteroidia;Flavobacteriales;Crocinitomicaceae;Fluviicola;uncultured Bacteroidetes/Chlorobi group bacterium	0	0	0	0	0	0	0	0	0	0	0	0	0	0	0	0	0	0.021825	0.0330415	0	0	0	0	0	0	0	0.0091543	0	0	0.00737663	0	0	0	0	0	0	0	0	0	0	0	0	0	0	0	0	0	0	0
Bacteroidetes;Bacteroidia;Flavobacteriales;Crocinitomicaceae;Fluviicola;uncultured Cryomorphaceae bacterium	0	0	0	0	0	0	0	0	0.0480017	0	0	0	0	0	0	0	0	0	0	0	0	0	0	0	0	0	0	0	0	0	0	0	0	0	0	0	0	0	0	0	0	0	0	0	0.0103239	0	0	0	0
Bacteroidetes;Bacteroidia;Flavobacteriales;Crocinitomicaceae;Fluviicola;uncultured bacterium	0	0	0	0	0.114579	0	0	0.0261943	0	0	0	0	0	0	0	0	0.0330651	0	0	0	0.00814863	0	0	0	0	0.0250241	0	0	0.00646488	0	0	0.017797	0	0	0	0	0	0	0	0.0368499	0	0	0	0	0	0	0	0	0.0122845
Bacteroidetes;Bacteroidia;Flavobacteriales;Crocinitomicaceae;Fluviicola;uncultured marine bacterium	0	0	0	0	0	0	0	0	0	0	0	0	0	0	0	0	0	0	0	0	0	0	0	0	0	0	0	0	0	0	0	0	0	0	0	0	0	0	0	0	0	0	0	0	0	0	0	0	0
Bacteroidetes;Bacteroidia;Flavobacteriales;Crocinitomicaceae;Fluviicola;__	0.343605	0	0.0546871	0	0	0	0	0.212829	0.568909	0	0	0	0	0.0334627	0	0	0	0	0	0.0301995	0.038415	0	0	0	0	0.00758305	0.102223	0	0.0129298	0	0	0	0.160675	0.0445203	0.041409	0.00871015	0	0	0	0	0.106203	0.0346356	0	0.00595088	0	0.00496598	0.0167423	0	0.00818967
Bacteroidetes;Bacteroidia;Flavobacteriales;Cryomorphaceae;uncultured;Ambiguous_taxa	0	0	0	0	0	0	0	0	0	0	0	0	0	0	0	0	0	0	0	0	0	0	0	0	0.00463729	0	0	0	0	0	0	0	0	0	0	0	0	0	0	0	0	0	0	0	0	0	0	0	0
Bacteroidetes;Bacteroidia;Flavobacteriales;Cryomorphaceae;uncultured;uncultured Bacteroidetes bacterium	0	0	0	0	0	0	0	0	0	0	0	0	0	0	0	0	0	0	0	0	0	0	0	0.0050067	0	0	0	0	0	0	0	0	0	0	0	0	0	0	0	0	0	0	0	0	0	0	0	0	0
Bacteroidetes;Bacteroidia;Flavobacteriales;Cryomorphaceae;uncultured;uncultured Flavobacteriia bacterium	0	0	0	0	0	0	0	0	0	0	0	0	0	0	0	0	0	0	0.00472021	0	0	0	0	0	0	0	0	0	0	0	0	0	0	0	0	0	0	0	0	0.0631712	0	0	0	0	0	0	0	0	0
Bacteroidetes;Bacteroidia;Flavobacteriales;Cryomorphaceae;uncultured;uncultured marine bacterium	0	0	0	0	0	0	0	0	0	0	0	0	0	0	0	0	0	0	0	0	0.0221177	0	0	0.0175234	0	0.0166827	0.01068	0	0	0.0245888	0	0	0	0	0	0	0	0	0	0	0	0	0	0	0	0	0	0	0.00900864
Bacteroidetes;Bacteroidia;Flavobacteriales;Cryomorphaceae;uncultured;__	0	0	0	0	0	0	0	0	0	0	0	0	0	0	0	0	0	0	0.0590026	0	0	0	0	0	0	0	0	0	0	0.00491775	0	0	0	0	0	0	0	0	0	0	0	0	0	0	0	0	0	0	0
Bacteroidetes;Bacteroidia;Flavobacteriales;Flavobacteriaceae;Algibacter;Ambiguous_taxa	0	0	0	0	0	0	0	0	0	0	0	0	0	0	0	0	0	0	0	0	0	0	0	0.0100134	0	0	0	0	0	0	0	0	0	0	0	0	0	0	0	0	0	0	0	0	0	0	0	0	0
Bacteroidetes;Bacteroidia;Flavobacteriales;Flavobacteriaceae;Aurantivirga;Ambiguous_taxa	0	0	0	0	0	0	0	0	0	0	0	0	0	0	0	0	0	0	0	0	0	0	0	0	0	0	0	0	0	0	0	0	0	0	0	0	0	0	0	0	0	0	0	0	0	0	0	0	0.0270259
Bacteroidetes;Bacteroidia;Flavobacteriales;Flavobacteriaceae;Capnocytophaga;Capnocytophaga sp. oral clone ASCH04	0	0	0	0	0	0	0	0	0	0	0	0	0	0	0	0	0	0	0	0	0	0	0	0	0	0	0	0	0	0	0	0	0	0	0	0	0	0	0	0	0	0	0	0	0	0	0	0	0
Bacteroidetes;Bacteroidia;Flavobacteriales;Flavobacteriaceae;Dokdonia;Ambiguous_taxa	0	0	0	0	0	0	0	0	0	0	0	0	0	0	0	0	0	0	0	0	0	0	0	0	0	0	0.0137314	0	0	0.0270476	0.0056501	0	0	0	0	0	0	0	0	0	0	0	0	0	0	0	0	0	0
Bacteroidetes;Bacteroidia;Flavobacteriales;Flavobacteriaceae;Flavobacterium;Ambiguous_taxa	0	0	0	0	0	0	0	0	0	0	0	0	0	0	0	0	0	0	0	0	0	0	0	0	0	0	0	0	0	0	0	0	0	0	0	0	0	0	0	0	0	0	0	0	0	0	0	0	0
Bacteroidetes;Bacteroidia;Flavobacteriales;Flavobacteriaceae;Flavobacterium;Bacteroidetes bacterium SCGC AAA027-N21	0	0	0	0	0	0	0	0	0	0	0	0	0	0	0	0	0	0	0	0	0	0	0	0	0	0	0	0	0	0	0	0	0	0	0	0	0	0	0	0	0	0	0	0	0	0	0	0	0
Bacteroidetes;Bacteroidia;Flavobacteriales;Flavobacteriaceae;Flavobacterium;Flavobacterium sp. wh15	0	0	0	0	0	0	0	0	0	0	0	0.00889581	0	0	0	0	0	0	0	0	0	0	0	0	0	0	0	0	0	0	0	0	0	0.049467	0	0	0	0.102363	0	0	0	0	0	0	0	0	0	0	0
Bacteroidetes;Bacteroidia;Flavobacteriales;Flavobacteriaceae;Flavobacterium;uncultured Bacteroidetes bacterium	0	0	0	0	0	0	0	0	0	0	0	0	0	0	0	0	0	0	0	0	0	0	0	0	0	0	0	0	0	0	0	0	0.148073	0	0	0.0360849	0	0	0	0.128975	0	0	0	0	0	0	0	0	0.00982761
Bacteroidetes;Bacteroidia;Flavobacteriales;Flavobacteriaceae;Flavobacterium;uncultured Cytophagales bacterium	0	0	0	0	0	0	0	0	0	0.00895759	0	0	0	0	0	0	0.0551086	0	0	0	0	0	0	0	0	0	0	0	0	0	0	0.0127121	0	0	0	0	0	0	0	0	0	0.00692713	0	0.0208281	0	0.00709426	0	0	0
Bacteroidetes;Bacteroidia;Flavobacteriales;Flavobacteriaceae;Flavobacterium;uncultured bacterium	0	0	0	0	0	0	0	0	0	0	0.0402919	0	0	0	0	0	0	0	0	0.0164724	0	0	0	0	0	0	0	0	0	0	0	0	0	0	0	0	0	0	0	0	0	0	0	0	0	0	0	0	0
Bacteroidetes;Bacteroidia;Flavobacteriales;Flavobacteriaceae;Flavobacterium;__	0.873421	0.0255962	0.0835498	0.532809	0.224575	16.0932	56.3933	0.422383	0.574243	0	0.0164152	0.00333593	0.0720158	0	9.9704	0.719424	0.189206	0.158407	0.0920441	0	0.0477277	0	0.00261172	0	0.0278237	0.0235075	0	0.040763	0.0116368	0.0344243	0	0.130935	0.261491	0	0.109044	0.00746584	0	0	0.0524659	0.0447463	0.0376848	0.0242449	0	0.0223158	0.144535	0	0	0.0230972	0.0606036
Bacteroidetes;Bacteroidia;Flavobacteriales;Flavobacteriaceae;Formosa;Ambiguous_taxa	0	0	0	0	0	0	0	0	0	0	0	0	0	0	0	0	0	0	0	0	0	0	0	0	0.0123661	0	0	0	0	0	0	0.0228818	0	0	0	0	0	0	0	0	0	0	0	0	0	0	0	0	0
Bacteroidetes;Bacteroidia;Flavobacteriales;Flavobacteriaceae;Formosa;__	0	0	0	0	0	0	0	0	0	0	0	0	0	0	0	0	0.0404129	0.0718113	0	0	0	0	0	0.0050067	0	0	0	0	0	0	0.00791014	0	0	0	0	0	0	0	0.00925869	0	0	0	0	0	0	0	0	0	0
Bacteroidetes;Bacteroidia;Flavobacteriales;Flavobacteriaceae;Gelidibacter;Ambiguous_taxa	0	0	0	0	0	0	0	0	0	0	0	0	0	0	0	0	0	0	0	0	0	0	0	0	0.026278	0	0	0	0	0.00491775	0	0	0	0	0	0	0	0	0	0	0	0	0	0	0	0	0	0	0
Bacteroidetes;Bacteroidia;Flavobacteriales;Flavobacteriaceae;Lacinutrix;Ambiguous_taxa	0	0	0	0	0	0	0	0	0	0	0	0	0	0	0	0	0	0	0	0	0	0	0	0	0	0	0	0	0	0	0	0	0	0	0	0	0	0	0	0	0	0	0	0	0	0	0	0	0
Bacteroidetes;Bacteroidia;Flavobacteriales;Flavobacteriaceae;Myroides;Ambiguous_taxa	0.0133008	0	0	0	0	0	0	0	0	0.0191948	0.0223844	0.0222395	0	0	0	0	0	0	0	0	0	0	0	0	0.0309152	0.0166827	0.0274629	0.00632529	0	0	0	0.0203394	0	0	0	0.0298634	0	0.00639771	0	0	0	0	0	0	0	0	0	0	0.0024569
Bacteroidetes;Bacteroidia;Flavobacteriales;Flavobacteriaceae;Myroides;Myroides phaeus	0	0	0	0	0	0	0	0	0	0.00639828	0	0.0144557	0	0	0	0	0	0	0	0	0	0	0	0.0200268	0	0.0212325	0	0	0	0	0	0.00635607	0	0	0	0	0	0	0	0	0	0	0	0	0	0	0	0	0
Bacteroidetes;Bacteroidia;Flavobacteriales;Flavobacteriaceae;Myroides;__	0	0	0	0	0	0	0	0	0	0	0.102968	0.00889581	0.0380084	0	0	0	0	0	0	0	0	0	0	0	0	0	0	0	0	0	0	0	0	0	0	0	0	0	0	0	0	0	0	0	0	0	0	0	0
Bacteroidetes;Bacteroidia;Flavobacteriales;Flavobacteriaceae;NS2b marine group;Ambiguous_taxa	0	0	0	0	0	0	0	0	0	0	0	0	0	0	0	0	0	0	0	0	0	0	0	0	0	0	0	0	0	0	0	0	0	0	0	0	0	0	0	0	0	0	0	0	0	0	0	0	0
Bacteroidetes;Bacteroidia;Flavobacteriales;Flavobacteriaceae;NS3a marine group;Ambiguous_taxa	0	0	0	0	0	0	0	0	0	0	0	0	0	0	0	0	0	0.0176008	0	0	0.00931272	0.0389171	0	0	0	0.00530814	0.0366172	0	0.0129298	0.0122944	0	0	0	0	0	0	0	0	0	0	0	0	0	0	0	0	0	0	0
Bacteroidetes;Bacteroidia;Flavobacteriales;Flavobacteriaceae;NS4 marine group;__	0	0	0	0	0	0	0	0	0	0	0	0	0	0	0	0	0.0110217	0	0	0	0	0	0	0	0	0	0	0	0	0	0.0113002	0	0	0	0	0	0	0	0	0.0631712	0	0	0	0	0	0	0	0	0
Bacteroidetes;Bacteroidia;Flavobacteriales;Flavobacteriaceae;NS5 marine group;Ambiguous_taxa	0	0	0	0	0	0	0	0	0	0	0	0	0	0	0	0	0	0.0267532	0.00708031	0.0123543	0	0	0	0.00250335	0.00309152	0	0	0.0070281	0.0155157	0	0.00452008	0	0	0	0.0427893	0.00746584	0	0	0	0.0921247	0	0	0	0	0	0	0	0	0
Bacteroidetes;Bacteroidia;Flavobacteriales;Flavobacteriaceae;NS5 marine group;__	0	0	0	0	0	0	0	0	0	0	0	0	0	0	0	0	0	0	0	0	0	0	0	0	0	0.0113746	0	0	0	0	0	0	0	0	0	0	0	0	0	0.0552748	0	0	0	0	0	0	0	0	0
Bacteroidetes;Bacteroidia;Flavobacteriales;Flavobacteriaceae;Polaribacter 1;__	0	0	0	0	0	0	0	0	0	0	0	0	0	0	0	0	0	0	0	0	0	0	0	0	0	0	0	0	0	0	0	0	0	0	0	0	0	0	0	0	0	0	0	0	0	0	0	0	0
Bacteroidetes;Bacteroidia;Flavobacteriales;Flavobacteriaceae;Polaribacter 2;Ambiguous_taxa	0	0	0	0	0	0	0	0	0	0	0	0	0	0	0	0	0	0	0	0	0	0	0	0	0	0	0	0	0	0	0	0	0	0	0	0	0	0	0	0	0	0	0	0	0	0	0	0	0
Bacteroidetes;Bacteroidia;Flavobacteriales;Flavobacteriaceae;Polaribacter 2;uncultured marine bacterium	0	0	0	0	0	0	0	0	0	0	0	0	0	0	0	0	0	0	0	0	0	0	0	0	0	0	0	0	0	0	0	0	0	0	0	0	0	0	0	0	0	0	0	0	0	0	0	0	0
Bacteroidetes;Bacteroidia;Flavobacteriales;Flavobacteriaceae;Polaribacter 3;Ambiguous_taxa	0	0	0	0	0	0	0	0	0	0	0	0	0	0	0	0	0	0	0	0	0	0	0	0	0	0	0	0	0	0	0	0	0	0	0	0	0	0	0	0	0	0	0	0	0	0	0	0	0.00737071
Bacteroidetes;Bacteroidia;Flavobacteriales;Flavobacteriaceae;Tenacibaculum;Ambiguous_taxa	0	0	0	0	0	0	0	0	0	0	0	0	0	0	0	0	0	0	0	0	0	0	0	0	0.00927457	0	0	0	0	0.0245888	0	0	0	0	0	0	0.00746478	0	0	0	0	0	0	0	0	0	0	0	0
Bacteroidetes;Bacteroidia;Flavobacteriales;Flavobacteriaceae;Tenacibaculum;Tenacibaculum maritimum	0	0	0	0	0	0	0	0	0	0	0	0	0	0	0	0	0	0	0	0	0	0	0	0	0	0	0	0	0.00775785	0	0	0	0	0	0	0	0.0149296	0	0	0	0	0	0	0	0	0	0	0	0.0131035
Bacteroidetes;Bacteroidia;Flavobacteriales;Flavobacteriaceae;Tenacibaculum;__	0	0	0	0	0	0	0	0	0	0	0	0	0	0	0	0	0	0	0	0	0	0	0	0	0	0	0	0	0	0	0.0158203	0	0	0	0	0	0	0	0	0	0	0	0	0	0	0	0	0	0
Bacteroidetes;Bacteroidia;Flavobacteriales;Flavobacteriaceae;Ulvibacter;uncultured Flavobacteriia bacterium	0	0	0	0	0	0	0	0	0	0	0	0	0	0	0	0	0.106543	0	0	0	0	0	0	0.00751004	0	0	0.0091543	0	0.00775785	0	0	0	0	0	0	0	0	0	0	0	0	0	0	0	0	0	0	0	0
Bacteroidetes;Bacteroidia;Flavobacteriales;Flavobacteriaceae;Ulvibacter;uncultured bacterium	0	0	0	0	0	0	0	0	0	0	0	0	0	0	0	0	0.0128587	0	0	0	0.0151332	0	0	0	0	0	0	0	0	0	0	0	0	0	0	0	0	0	0	0	0	0	0	0	0	0	0	0	0
Bacteroidetes;Bacteroidia;Flavobacteriales;Flavobacteriaceae;__;__	0	0	0	0	0	0	0	0	0	0	0	0	0	0	0	0	0	0	0	0	0	0	0	0	0	0	0	0	0	0	0.0101702	0.077544	0	0	0	0	0	0	0	0.115814	0.0668048	0	0	0	0	0.00567541	0	0	0.0270259
Bacteroidetes;Bacteroidia;Flavobacteriales;NS7 marine group;Ambiguous_taxa;Ambiguous_taxa	0	0	0	0	0	0	0	0	0	0	0	0	0	0	0	0	0	0	0	0	0	0	0	0	0	0	0.0137314	0	0	0	0	0	0	0	0	0	0	0	0	0	0	0	0	0	0	0	0	0	0
Bacteroidetes;Bacteroidia;Flavobacteriales;NS9 marine group;Ambiguous_taxa;Ambiguous_taxa	0	0	0	0	0	0	0	0	0	0	0	0	0	0	0	0	0	0	0	0	0	0	0	0	0	0	0	0	0	0	0	0	0	0	0	0	0	0	0	0	0	0	0	0	0	0	0	0	0
Bacteroidetes;Bacteroidia;Flavobacteriales;NS9 marine group;hydrothermal vent metagenome;hydrothermal vent metagenome	0	0	0	0	0	0	0	0	0	0	0	0	0	0	0	0	0	0	0	0	0	0	0	0	0	0	0	0	0	0	0	0	0	0	0	0	0	0	0	0	0	0	0	0	0	0	0	0	0
Bacteroidetes;Bacteroidia;Flavobacteriales;NS9 marine group;metagenome;metagenome	0	0	0	0	0	0	0	0	0	0	0	0.00778383	0	0	0	0	0	0	0	0	0	0	0	0	0	0	0	0	0	0	0.00226004	0	0	0	0	0.00373292	0	0	0	0	0	0	0	0	0	0	0	0	0
Bacteroidetes;Bacteroidia;Flavobacteriales;NS9 marine group;uncultured Bacteroidetes bacterium;uncultured Bacteroidetes bacterium	0	0	0	0	0	0	0	0	0	0	0	0	0	0	0	0	0	0.0802596	0	0	0	0	0	0	0	0	0	0	0	0	0	0	0	0	0	0	0	0	0	0	0	0	0	0	0	0	0	0	0
Bacteroidetes;Bacteroidia;Flavobacteriales;NS9 marine group;uncultured bacterium;uncultured bacterium	0	0	0	0	0	0	0	0	0	0	0	0	0	0	0	0	0	0	0	0	0	0	0	0	0	0	0	0	0	0	0	0.0152546	0	0	0	0	0	0	0	0	0	0	0	0.00892631	0	0	0	0	0
Bacteroidetes;Bacteroidia;Flavobacteriales;NS9 marine group;uncultured marine bacterium;uncultured marine bacterium	0	0	0	0	0	0	0	0	0	0	0	0	0	0	0	0	0	0	0	0	0	0	0	0	0	0	0	0	0	0	0	0	0	0	0	0	0	0	0	0.0078964	0	0	0	0	0	0	0	0	0
Bacteroidetes;Bacteroidia;Flavobacteriales;NS9 marine group;__;__	0	0	0	0	0	0	0	0	0	0	0	0	0	0	0	0	0	0	0	0	0	0	0	0	0	0	0	0	0	0	0	0	0	0	0	0	0	0	0	0	0	0	0	0	0	0	0	0	0
Bacteroidetes;Bacteroidia;Flavobacteriales;Weeksellaceae;Chryseobacterium;Ambiguous_taxa	0	0	0	0	0	0	0	0.117874	0	0.0140762	0	0	0	0	0	0	0	0.0281613	0	0	0	0.0152284	0	0	0	0	0	0	0.00646488	0	0.00452008	0.0190682	0	0.0272068	0	0	0	0.102363	0.0864144	0	0	0	0	0	0.0154859	0.0028377	0	0	0.114655
Bacteroidetes;Bacteroidia;Flavobacteriales;Weeksellaceae;Chryseobacterium;Chryseobacterium indologenes	0	0	0	0	0	0	0	0	0	0	0	0	0	0	0	0	0	0	0	0	0	0	0	0	0	0	0	0	0	0	0	0	0	0	0	0.0124431	0	0	0	0	0	0	0	0	0	0	0	0	0
Bacteroidetes;Bacteroidia;Flavobacteriales;Weeksellaceae;Chryseobacterium;uncultured Bacteroidetes bacterium	0	0	0	0	0	0	0	0	0	0	0	0	0	0	0	0	0	0	0	0	0	0	0	0	0	0	0	0	0	0	0	0	0	0	0	0	0	0	0	0	0	0	0	0	0	0	0	0	0
Bacteroidetes;Bacteroidia;Flavobacteriales;Weeksellaceae;Chryseobacterium;__	0	0.0167699	0	0	0	0	0	0	0	0	0	0	0	0	0	0	0	0.0267532	0.0118005	0.00686351	0	0	0	0.00375502	0.0139119	0	0	0	0	0	0	0	0	0	0	0	0	0	0	0.0894925	0	0	0	0.0133895	0	0	0	0	0.0196552
Bacteroidetes;Bacteroidia;Flavobacteriales;Weeksellaceae;Cloacibacterium;Ambiguous_taxa	0	0	0	0	0	0	0	0	0	0	0	0	0	0.0418284	0	0	0	0	0	0	0	0	0	0	0	0	0	0	0	0	0	0	0	0	0	0	0	0.0678157	0	0	0	0	0	0	0	0	0	0	0.00982761
Bacteroidetes;Bacteroidia;Flavobacteriales;Weeksellaceae;Cloacibacterium;uncultured Cloacibacterium sp.	0	0	0	0	0	0	0	0	0	0	0	0	0	0	0	0	0	0.0408339	0	0.00960892	0	0	0	0	0	0	0	0	0	0	0	0	0	0	0	0	0	0	0	0	0	0	0	0	0	0	0	0	0
Bacteroidetes;Bacteroidia;Flavobacteriales;Weeksellaceae;Cloacibacterium;__	0	0	0	0	0	0	0	0	0	0	0	0	0	0	0	0	0.0128587	0	0	0	0	0	0	0	0	0	0	0.0070281	0	0	0	0	0	0	0	0	0	0	0	0	0	0	0	0	0	0	0	0	0
Bacteroidetes;Bacteroidia;Flavobacteriales;Weeksellaceae;Elizabethkingia;__	0.0376857	0	0	0	0	0	0	0	0	0	0	0	0	0	0	0	0	0	0	0	0	0	0	0	0	0	0	0	0	0	0	0	0	0	0	0	0	0	0	0	0	0	0	0	0	0	0	0	0
Bacteroidetes;Bacteroidia;Flavobacteriales;Weeksellaceae;Empedobacter;uncultured bacterium	0	0	0	0	0	0	0	0	0	0	0	0	0	0	0	0	0	0	0	0.00549081	0	0	0	0	0	0	0	0	0	0	0	0.0152546	0	0	0	0	0	0	0	0	0	0	0	0.0119018	0	0	0	0.00271732	0.0384915
Bacteroidetes;Bacteroidia;Flavobacteriales;Weeksellaceae;Empedobacter;__	0	0	0	0.117218	0	0	0	0	0	0	0	0	0	0	0	0	0	0	0	0	0	0	0	0	0	0.00682475	0	0	0	0	0.0056501	0	0	0.0816205	0	0	0	0	0	0	0	0	0	0	0	0	0	0	0
Bacteroidetes;Bacteroidia;Flavobacteriales;Weeksellaceae;Moheibacter;uncultured bacterium	0	0	0	0	0	0	0	0	0	0.0204745	0	0	0	0	0	0	0	0	0	0	0	0	0	0	0	0	0	0	0	0	0	0	0	0	0	0	0	0	0	0	0	0	0	0	0	0	0	0	0
Bacteroidetes;Bacteroidia;Flavobacteriales;Weeksellaceae;Weeksella;Weeksella sp. FF8	0	0	0	0	0	0	0	0	0	0	0	0	0	0	0	0	0	0	0	0	0	0	0	0	0	0.00379153	0	0	0	0	0	0	0	0	0	0	0	0	0	0	0	0	0	0	0	0	0	0	0
Bacteroidetes;Bacteroidia;Flavobacteriales;__;__;__	0	0	0	0	0	0	0	0	0	0	0	0	0	0	0	0	0	0	0	0	0	0	0	0	0	0	0.0244115	0	0	0	0	0	0	0	0	0	0	0	0	0	0	0	0	0	0	0	0	0	0
Bacteroidetes;Bacteroidia;Sphingobacteriales;AKYH767;Ambiguous_taxa;Ambiguous_taxa	0.00886721	0	0	0	0	0	0	0	0	0	0	0	0	0	0	0	0	0	0	0	0	0	0	0	0	0	0	0	0	0	0	0	0	0	0	0	0	0	0	0	0	0	0	0	0	0	0	0	0
Bacteroidetes;Bacteroidia;Sphingobacteriales;KD3-93;uncultured bacterium;uncultured bacterium	0	0	0	0	0	0	0	0	0	0	0	0	0	0	0	0	0	0	0	0	0	0	0	0	0	0	0	0	0	0	0	0	0	0	0	0	0	0	0	0	0	0	0	0	0	0	0	0	0
Bacteroidetes;Bacteroidia;Sphingobacteriales;LiUU-11-161;metagenome;metagenome	0.0820217	0	0	0	0	0	0	0	0	0	0	0	0	0	0	0	0	0	0	0	0	0	0	0	0	0	0	0.00351405	0	0	0	0	0	0	0	0	0	0	0	0	0	0	0	0	0	0	0	0	0
Bacteroidetes;Bacteroidia;Sphingobacteriales;NS11-12 marine group;Ambiguous_taxa;Ambiguous_taxa	0	0.00970891	0	0	0	0	0	0.0556629	0.0977813	0	0	0	0.018004	0	0	0	0	0.0105605	0	0	0	0	0	0.0112651	0.0231864	0	0	0	0	0	0.0113002	0.0266955	0	0	0.0151833	0	0.0970421	0	0	0.0605391	0	0	0	0.0297544	0	0	0	0.00543463	0.0024569
Bacteroidetes;Bacteroidia;Sphingobacteriales;NS11-12 marine group;metagenome;metagenome	0	0	0	0	0	0	0	0	0.0497795	0	0	0	0	0	0	0	0	0	0	0	0	0	0	0	0	0	0	0	0	0	0	0	0	0	0	0	0	0	0	0	0	0	0	0	0	0	0	0	0
Bacteroidetes;Bacteroidia;Sphingobacteriales;NS11-12 marine group;uncultured Cytophagales bacterium;uncultured Cytophagales bacterium	0.0709377	0	0	0	0	0	0	0	0.0657801	0	0	0	0	0	0	0	0	0	0	0	0	0	0	0	0	0	0	0	0	0	0	0	0	0	0	0	0	0	0	0	0	0	0	0	0	0	0	0	0
Bacteroidetes;Bacteroidia;Sphingobacteriales;NS11-12 marine group;uncultured bacterium;uncultured bacterium	0	0	0	0.0319686	0.169577	0	0	0	0.147561	0.0217542	0.0119383	0	0	0	0	0	0.00734781	0	0	0.00549081	0	0	0	0	0	0	0.00762858	0	0	0	0	0	0.0535585	0	0	0.00497723	0	0.00639771	0	0	0	0	0	0	0	0.0113508	0.00837113	0	0
Bacteroidetes;Bacteroidia;Sphingobacteriales;NS11-12 marine group;__;__	0	0	0	0	0.210825	0	0	0	0.0746693	0	0.0193998	0	0	0	0	0	0	0.0767395	0	0	0.00232818	0.0287648	0	0.00375502	0	0.0265407	0	0	0	0	0.0271205	0	0.018903	0	0.0980013	0.0298634	0	0	0	0	0	0	0	0.0446316	0.0103239	0.0120602	0	0	0
Bacteroidetes;Bacteroidia;Sphingobacteriales;Sphingobacteriaceae;Parapedobacter;__	0	0	0	0	0	0	0	0	0	0	0	0	0	0	0	0	0	0	0	0	0	0	0	0	0	0.0204742	0	0	0	0	0.0180803	0	0	0	0	0	0	0	0	0	0	0	0	0	0	0	0	0	0
Bacteroidetes;Bacteroidia;Sphingobacteriales;Sphingobacteriaceae;Pedobacter;Ambiguous_taxa	0	0	0.0638017	0	0	0	0	0	0	0	0	0	0	0	0	0	0	0.0288653	0	0	0.00814863	0.0118443	0	0.0112651	0	0.0250241	0.0350915	0.00281124	0	0	0.0214704	0.0139833	0	0.0717271	0.0345075	0	0	0.0153545	0.0308623	0	0	0	0	0	0	0	0	0	0
Bacteroidetes;Bacteroidia;Sphingobacteriales;Sphingobacteriaceae;Pedobacter;uncultured bacterium	0	0	0	0	0	0	0	0	0	0	0	0	0	0	0	0	0	0	0	0	0	0	0	0	0	0	0	0	0	0	0	0	0	0	0	0	0	0	0	0	0	0	0	0	0	0	0	0	0
Bacteroidetes;Bacteroidia;Sphingobacteriales;Sphingobacteriaceae;Pedobacter;__	0	0	0	0	0	0	0	0	0	0	0	0	0	0	0	0	0	0	0	0.013727	0	0	0	0	0	0	0	0	0	0	0	0	0	0	0	0	0	0.0268704	0.0216036	0	0	0	0	0	0	0	0	0	0
Bacteroidetes;Bacteroidia;Sphingobacteriales;Sphingobacteriaceae;Sphingobacterium;uncultured bacterium	0	0	0	0	0	0	0	0	0	0.0921352	0.0298458	0	0	0.0585598	0	0	0.0716411	0.0267532	0.0212409	0.100207	0.0186254	0.0592217	0	0	0.23341	0.0417068	0.187663	0.0231927	0.126712	0.280312	0.149163	0.0800864	0.037806	0.180555	0.502429	0.265037	0.216478	0.162502	0.558607	0	0	0	0	0.0743859	0	0	0	0	0
Bacteroidetes;Bacteroidia;Sphingobacteriales;Sphingobacteriaceae;Sphingobacterium;__	0	0	0	0	0	0	0	0	0	0.0550252	0	0	0	0	0	0	0	0	0	0	0	0.0203046	0	0	0	0	0	0	0	0	0	0	0	0	0	0	0	0	0	0	0	0	0	0	0	0	0	0	0
Bacteroidetes;Bacteroidia;Sphingobacteriales;Sphingobacteriaceae;__;__	0	0	0	0	0	0	0	0	0	0	0	0	0	0	0	0	0	0	0	0	0.00814863	0	0	0	0	0	0	0	0	0	0	0	0	0	0	0.0136874	0	0	0	0	0	0	0	0.0193403	0	0	0	0	0
Bacteroidetes;Bacteroidia;Sphingobacteriales;env.OPS 17;metagenome;metagenome	0	0	0	0	0	0	0	0	0	0	0	0	0	0	0	0	0	0	0	0	0.00814863	0	0	0	0	0	0	0	0	0	0.0237304	0.00889849	0	0	0	0	0	0	0	0	0	0	0	0	0	0	0	0	0
Bacteroidetes;Bacteroidia;Sphingobacteriales;env.OPS 17;uncultured Bacteroidetes bacterium;uncultured Bacteroidetes bacterium	0	0	0	0	0	0	0	0	0	0	0.010446	0	0	0	0	0	0	0	0.0165207	0	0	0	0	0	0	0	0	0.00281124	0	0	0	0	0	0	0	0	0	0	0	0	0	0	0	0	0	0	0.00532708	0.00407598	0
Bacteroidetes;Bacteroidia;Sphingobacteriales;env.OPS 17;uncultured bacterium;uncultured bacterium	0	0	0	0	0.0595811	0	0	0	0	0	0	0.00778383	0	0.0485209	0	0	0.0165326	0.00915242	0.0118005	0.00960892	0.0116409	0.00676819	0	0	0	0	0	0	0	0	0	0.00381364	0	0.0222601	0	0	0	0.00511817	0	0	0	0	0	0	0	0	0	0.00951061	0
Bacteroidetes;Bacteroidia;Sphingobacteriales;env.OPS 17;__;__	0	0	0	0	0.0183326	0	0	0	0.0373347	0	0	0	0	0	0	0	0	0	0	0	0	0	0	0	0.00927457	0	0	0	0	0	0	0	0	0	0	0	0	0	0	0	0	0	0	0.00892631	0	0.0028377	0	0.00951061	0
Bacteroidetes;Bacteroidia;__;__;__;__	0.0155176	0	0	0	0.00916632	0	0	0.02292	0	0.0243135	0	0	0.0200044	0	0	0	0.112054	0.0922282	0	0.0205905	0.00931272	0	0	0	0.0139119	0.00834136	0.0244115	0	0	0	0.0056501	0	0	0	0	0.0858572	0	0	0	0.0368499	0.0342589	0	0	0	0	0.00567541	0	0.0149452	0.0024569
Bacteroidetes;Ignavibacteria;OPB56;Ambiguous_taxa;Ambiguous_taxa;Ambiguous_taxa	0	0	0	0	0	0	0	0	0.152894	0	0	0	0	0	0	0	0	0	0	0	0	0	0	0	0	0	0	0	0	0	0	0	0	0	0	0	0	0	0	0	0	0	0	0	0	0	0	0	0
Bacteroidetes;Ignavibacteria;OPB56;Candidatus Kapabacteria sp. 59-99;Candidatus Kapabacteria sp. 59-99;Candidatus Kapabacteria sp. 59-99	0	0	0	0	0	0	0	0	0	0	0	0	0	0	0	0	0	0	0	0	0	0	0	0	0	0	0	0	0	0	0	0	0	0	0	0	0	0	0.0432072	0	0	0	0	0	0	0	0	0	0
Bacteroidetes;Ignavibacteria;OPB56;metagenome;metagenome;metagenome	0	0	0	0	0	0	0	0	0	0.0102372	0	0	0	0	0	0	0.0698042	0	0	0	0	0	0	0	0	0	0	0	0	0.0098355	0	0	0	0	0	0	0	0	0	0	0	0	0	0	0	0	0	0	0
Bacteroidetes;Ignavibacteria;OPB56;uncultured Chlorobi bacterium;uncultured Chlorobi bacterium;uncultured Chlorobi bacterium	0	0	0	0	0	0	0	0	0	0	0	0	0	0	0	0	0	0	0	0	0	0	0	0	0	0	0	0	0	0	0	0	0	0	0	0	0	0	0	0	0	0	0	0	0	0.00354713	0	0	0
Bacteroidetes;Ignavibacteria;OPB56;uncultured bacterium;uncultured bacterium;uncultured bacterium	0	0	0	0	0	0	0	0	0	0	0	0	0	0	0	0	0	0	0	0	0	0	0	0	0	0	0	0	0	0	0	0	0	0	0	0	0	0	0	0	0	0	0	0	0	0	0	0	0
Bacteroidetes;Ignavibacteria;OPB56;__;__;__	0	0	0.0455726	0	0	0	0	0	0	0	0	0	0	0	0	0	0	0	0	0	0	0	0	0	0	0	0	0	0	0	0	0	0	0	0	0	0	0	0	0	0	0	0	0	0	0	0	0	0
Bacteroidetes;__;__;__;__;__	0	0	0	0	0	0	0	0	0.0142227	0	0	0	0	0	0	0	0	0.0506903	0	0.013727	0.00465636	0	0	0	0	0	0	0	0	0	0.0113002	0	0.0976655	0	0.0151833	0	0.0989083	0	0	0	0	0	0	0	0	0	0	0.0163039	0
Chloroflexi;Anaerolineae;1-20;Ambiguous_taxa;Ambiguous_taxa;Ambiguous_taxa	0	0	0	0	0	0	0	0	0	0	0	0	0	0	0	0	0	0	0	0	0	0	0	0	0	0	0	0	0	0	0	0	0	0	0	0	0	0	0	0	0	0.00865891	0	0	0	0	0	0	0
Chloroflexi;Anaerolineae;Anaerolineales;Anaerolineaceae;uncultured;__	0	0	0	0	0	0	0	0	0	0	0	0	0	0	0	0	0	0	0	0	0	0	0	0	0	0	0	0	0	0	0	0	0	0	0	0	0.158626	0	0	0	0	0	0	0	0	0	0	0	0
Chloroflexi;Anaerolineae;RBG-13-54-9;Ambiguous_taxa;Ambiguous_taxa;Ambiguous_taxa	0	0	0	0	0	0	0	0	0	0	0	0	0	0	0	0	0	0	0	0	0	0	0	0	0	0	0	0	0	0	0	0	0	0	0	0	0	0	0	0	0	0	0	0	0	0	0	0	0
Chloroflexi;Anaerolineae;RBG-13-54-9;uncultured bacterium;uncultured bacterium;uncultured bacterium	0	0	0	0	0	0	0	0	0	0	0	0	0	0	0	0	0	0	0	0	0	0	0	0	0	0	0	0	0	0	0	0	0	0	0	0	0	0	0	0	0	0	0	0	0	0	0	0	0
Chloroflexi;Anaerolineae;SBR1031;A4b;uncultured sludge bacterium S9;uncultured sludge bacterium S9	0	0	0	0	0	0	0	0	0	0	0	0	0	0	0	0	0	0	0	0	0	0	0	0	0	0	0	0	0	0	0	0	0	0	0	0	0	0	0	0	0	0	0	0.0223158	0	0	0	0	0.00573277
Chloroflexi;Chloroflexia;Chloroflexales;Roseiflexaceae;uncultured;uncultured bacterium	0	0	0	0	0	0	0	0	0	0	0	0	0	0	0	0	0	0	0	0	0	0	0	0.0125167	0	0	0	0	0	0	0	0	0	0	0	0	0.0261267	0	0	0	0	0	0	0	0	0	0	0	0
Chloroflexi;Dehalococcoidia;SAR202 clade;hydrothermal vent metagenome;hydrothermal vent metagenome;hydrothermal vent metagenome	0	0	0	0	0	0	0	0	0	0	0	0	0	0	0	0	0	0	0	0	0	0	0	0	0	0	0	0	0	0	0	0	0	0	0	0.0298634	0	0	0	0	0	0	0	0	0	0	0	0	0
Cyanobacteria;Melainabacteria;Obscuribacterales;Ambiguous_taxa;Ambiguous_taxa;Ambiguous_taxa	0	0	0.0653208	0	0	0	0	0	0	0	0.0805838	0	0	0	0	0	0	0	0	0	0	0	0	0	0	0	0	0	0	0	0	0	0	0	0	0	0	0	0	0	0	0	0	0	0	0	0	0.0217385	0
Cyanobacteria;Melainabacteria;Vampirovibrionales;uncultured bacterium;uncultured bacterium;uncultured bacterium	0	0	0.01671	0	0	0	0	0	0	0	0	0	0	0	0	0	0	0	0	0	0	0	0	0	0	0	0	0	0	0	0	0	0	0	0	0	0	0	0	0	0	0	0	0	0	0	0	0.00815195	0
Cyanobacteria;Oxyphotobacteria;Leptolyngbyales;Leptolyngbyaceae;uncultured;Ambiguous_taxa	0	0	0	0	0	0	0	0	0	0	0	0	0	0	0	0	0	0	0	0	0	0	0	0	0	0	0	0	0	0	0	0	0	0	0	0	0.00746478	0	0	0	0	0	0	0	0	0	0	0	0
Cyanobacteria;Oxyphotobacteria;Nostocales;Chamaesiphonaceae;Chamaesiphon PCC-6605;uncultured cyanobacterium	0	0	0	0	0	0	0	0	0.00533352	0	0	0	0	0	0	0	0	0	0	0	0	0	0	0.0125167	0	0	0	0	0	0	0	0	0	0	0	0	0	0	0	0	0.102777	0	0	0	0	0	0	0	0
Cyanobacteria;Oxyphotobacteria;Nostocales;Cyanobacteriaceae;__;__	0	0	0	0	0	0	0	0	0	0	0	0	0	0	0	0	0	0	0	0	0	0	0	0.00375502	0	0	0	0	0	0	0	0	0	0	0	0	0	0	0	0	0	0	0	0	0	0	0	0	0
Cyanobacteria;Oxyphotobacteria;Nostocales;Xenococcaceae;Pleurocapsa PCC-7319;Ambiguous_taxa	0	0	0	0	0	0	0	0	0	0	0	0	0	0	0	0	0	0	0	0	0	0	0	0	0	0	0	0	0	0	0	0	0	0	0	0	0	0	0	0	0	0	0	0	0	0	0	0	0
Cyanobacteria;Oxyphotobacteria;Synechococcales;Cyanobiaceae;Cyanobium PCC-6307;__	0	0	0	0	0	0	0	0	0	0	0	0	0	0	0	0	0	0	0	0	0	0	0	0	0	0	0	0	0	0	0	0	0	0	0	0	0	0	0	0	0	0	0	0	0	0	0.00228304	0	0
Cyanobacteria;Oxyphotobacteria;Synechococcales;Cyanobiaceae;Synechococcus CC9902;__	0	0	0	0	0	0	0	0	0	0	0	0	0	0	0	0	0	0	0	0	0	0	0	0	0	0	0	0	0	0	0	0	0.06301	0	0.0248454	0.0423064	0.182887	0.0230317	0.0586384	0.0710676	0.64578	0.0606124	0.00613089	0.0937263	0.312298	0.0510787	0	0	0
Cyanobacteria;Oxyphotobacteria;Synechococcales;Cyanobiaceae;__;__	0	0	0	0	0	0	0	0	0	0	0	0	0	0	0	0	0.0973585	0.149959	0.0566425	0.0329449	0.0162973	0.072758	0	0.0976306	0.0664678	0.0424651	0	0.0463854	0.0659417	0.0442598	0.0203404	0.250429	0.103966	0.0544137	0.173918	0.102033	0.365774	0.129234	0.243812	0.213203	1.01578	0.0294403	0.0163491	0.322835	0.699445	0.144723	0	0.0108693	0
Dadabacteria;Dadabacteriia;Dadabacteriales;uncultured marine bacterium;uncultured marine bacterium;uncultured marine bacterium	0	0	0	0	0	0	0	0	0	0	0	0	0	0	0	0	0	0	0	0	0	0	0	0	0	0	0	0	0	0	0	0	0	0	0	0	0	0	0	0	0	0	0	0	0	0	0	0	0
Deinococcus-Thermus;Deinococci;Deinococcales;Deinococcaceae;Deinococcus;Ambiguous_taxa	0	0	0	0	0	0	0	0	0	0	0	0	0	0	0	0	0	0	0	0	0	0	0	0	0	0	0	0	0	0	0	0	0	0	0	0	0	0	0	0	0	0	0	0	0	0.00709426	0	0	0.0278449
Deinococcus-Thermus;Deinococci;Deinococcales;Deinococcaceae;Deinococcus;bacterium ODP-193-43	0	0	0	0	0	0	0	0	0	0	0	0	0	0	0	0	0	0	0	0	0	0	0	0	0	0	0	0	0	0	0	0	0	0	0.0096621	0	0	0.00383862	0	0	0	0	0	0	0	0	0	0	0
Deinococcus-Thermus;Deinococci;Deinococcales;Deinococcaceae;uncultured;uncultured bacterium	0	0	0	0	0	0	0	0	0	0	0	0	0	0	0	0	0	0	0	0	0	0	0	0	0	0	0	0	0	0	0	0	0	0	0	0	0	0	0	0	0	0	0	0	0	0	0	0	0
Deinococcus-Thermus;Deinococci;Thermales;Thermaceae;Meiothermus;Ambiguous_taxa	0	0	0	0	0	0	0	0	0	0	0	0	0	0	0	0	0	0	0	0	0	0	0	0	0	0.00530814	0	0	0	0	0.00904016	0	0	0.0197868	0	0	0	0	0.00925869	0	0	0	0	0	0	0	0	0	0
Deinococcus-Thermus;Deinococci;Thermales;Thermaceae;Thermus;Thermus scotoductus	0	0	0	0	0.00916632	0	0	0	0	0	0	0	0	0	0	0	0	0	0	0	0	0	0	0	0	0	0	0.00632529	0	0	0	0	0	0	0	0	0	0	0	0	0	0	0	0	0.0593625	0	0	0	0
Deinococcus-Thermus;Deinococci;Thermales;Thermaceae;Thermus;Thermus thermophilus	0	0	0	0	0	0	0	0	0	0	0	0	0	0	0	0	0	0	0	0	0	0	0	0	0	0	0	0	0	0	0	0	0.0157525	0	0	0	0.0634506	0.030709	0.0462934	0.0894925	0	0	0	0	0	0	0	0	0
Deinococcus-Thermus;Deinococci;Thermales;Thermaceae;Thermus;uncultured bacterium	0	0	0	0	0	0	0	0	0	0	0	0	0	0	0	0	0	0	0	0	0	0	0	0	0	0	0	0	0	0	0	0	0	0	0	0	0	0.0345476	0	0	0	0	0	0	0	0	0	0	0
Dependentiae;Babeliae;Babeliales;Babeliaceae;uncultured bacterium;uncultured bacterium	0	0.0273615	0.0136718	0	0	0	0	0	0	0	0	0	0	0	0	0	0	0.00281613	0	0	0	0	0	0	0	0	0	0	0	0	0	0	0	0	0	0	0	0	0	0	0	0	0	0	0	0	0	0	0
Dependentiae;Babeliae;Babeliales;Vermiphilaceae;uncultured bacterium;uncultured bacterium	0	0	0	0	0	0	0	0	0	0	0	0	0	0	0	0	0	0	0	0	0	0	0	0	0	0	0	0	0	0	0	0	0	0	0	0	0	0	0	0	0	0	0	0	0	0	0	0	0
Dependentiae;Babeliae;Babeliales;uncultured bacterium;uncultured bacterium;uncultured bacterium	0	0	0	0	0	0	0	0	0	0	0.00895375	0.0044479	0	0	0	0	0.0110217	0	0	0	0	0	0	0	0	0	0	0	0	0	0	0	0	0	0	0	0	0	0	0.0131607	0	0	0	0	0	0	0	0	0
Dependentiae;Babeliae;Babeliales;__;__;__	0	0	0	0	0	0	0	0	0	0	0	0	0	0	0	0	0	0	0	0	0.0291023	0	0	0	0	0	0	0	0	0	0.00226004	0	0	0	0	0	0	0	0	0.0736997	0	0	0	0	0	0	0	0	0
Epsilonbacteraeota;Campylobacteria;Campylobacterales;Arcobacteraceae;Arcobacter;Ambiguous_taxa	0	0	0	0	0	0	0	0	0	0.00639828	0.0223844	0.0533748	0	0.0167314	0	0	0	0	0	0	0.0162973	0	0	0.0050067	0	0.0978214	0.0976458	0	0.0051719	0	0.00678012	0	0.0283545	0	0	0	0	0.0102363	0	0	0	0	0	0	0	0	0	0	0
Epsilonbacteraeota;Campylobacteria;Campylobacterales;Arcobacteraceae;Arcobacter;Arcobacter cryaerophilus	0	0	0	0	0	0	0	0	0	0.00767794	0	0	0	0	0	0	0	0	0	0	0	0	0	0	0	0	0	0	0	0	0	0	0.116568	0	0	0.00995446	0	0	0	0	0	0	0	0	0	0	0	0	0
Epsilonbacteraeota;Campylobacteria;Campylobacterales;Arcobacteraceae;Arcobacter;metagenome	0	0	0	0	0	0	0	0	0	0.0204745	0	0	0	0	0	0	0.0165326	0.0309774	0	0.0466719	0	0.0152284	0	0	0.0618305	0.0591478	0.0137314	0	0	0	0.0226004	0	0	0	0	0	0	0	0	0	0	0	0	0	0	0	0	0	0
Epsilonbacteraeota;Campylobacteria;Campylobacterales;Arcobacteraceae;Arcobacter;uncultured bacterium	0	0	0	0	0	0	0	0	0	0	0	0	0	0	0	0	0	0	0.0165207	0	0	0	0	0	0	0.0288156	0	0	0	0	0	0	0	0	0	0	0	0	0	0	0	0	0	0	0	0	0	0	0
Epsilonbacteraeota;Campylobacteria;Campylobacterales;Arcobacteraceae;Arcobacter;uncultured marine bacterium	0	0	0	0	0	0	0	0	0	0	0	0	0	0	0	0	0	0.0605468	0	0	0.0349227	0	0	0	0	0	0	0	0	0	0	0	0	0	0	0	0	0	0	0	0	0	0	0	0	0	0	0	0
Epsilonbacteraeota;Campylobacteria;Campylobacterales;Arcobacteraceae;Arcobacter;__	0.0775881	0	0	0	0	0	0	0	0	0	0	0	0.0120026	0	0	0	0	0	0	0	0.012805	0	0	0.00876172	0	0	0.04272	0	0	0	0.00339006	0.0203394	0	0	0	0	0	0	0	0	0	0	0	0	0	0	0	0	0
Epsilonbacteraeota;Campylobacteria;Campylobacterales;Sulfurospirillaceae;Sulfurospirillum;uncultured Sulfurospirillum sp.	0	0	0	0	0	0	0	0	0	0	0	0	0	0	0	0	0	0	0	0	0	0	0	0	0	0	0	0	0	0	0	0	0	0	0	0	0	0	0	0	0	0	0	0	0	0	0	0	0.0049138
Epsilonbacteraeota;Campylobacteria;Campylobacterales;Thiovulaceae;Sulfurimonas;uncultured bacterium	0	0	0	0	0	0	0	0	0	0	0	0	0	0	0	0	0	0	0	0.037063	0	0	0	0	0	0	0	0	0	0	0	0	0	0	0	0	0	0	0	0	0	0	0	0	0	0	0	0	0
Firmicutes;Bacilli;Bacillales;Alicyclobacillaceae;Tumebacillus;Ambiguous_taxa	0	0	0	0	0	0	0	0	0	0	0	0	0	0	0	0	0	0	0	0	0	0	0	0	0	0	0	0	0	0	0	0	0	0	0	0	0	0	0	0	0	0	0	0	0	0	0	0	0
Firmicutes;Bacilli;Bacillales;Alicyclobacillaceae;Tumebacillus;uncultured bacterium	0	0	0	0	0	0	0	0	0	0	0	0	0	0	0	0	0	0	0	0	0	0	0	0	0	0	0	0	0	0	0	0	0	0	0	0	0	0	0	0	0	0	0	0	0	0	0	0	0
Firmicutes;Bacilli;Bacillales;Bacillaceae;Aeribacillus;Aeribacillus pallidus	0.101973	0.0150047	0	0.155107	0	0	0	0.261943	0	0	0.035815	0	0	0	0	0	0	0	0	0.0301995	0.0221177	0	0	0	0.058739	0	0	0	0.0155157	0.0442598	0	0.0444925	0.037806	0.0296802	0	0.0335963	0	0.0754929	0	0	0	0	0	0.23506	0.121306	0.00709426	0.0152202	0	0.0180173
Firmicutes;Bacilli;Bacillales;Bacillaceae;Aeribacillus;Bacillus sp. mixed culture J2-73	0	0	0	0	0	0	0	0	0	0	0	0	0	0	0	0	0	0	0	0	0	0	0	0	0	0	0	0	0	0	0	0	0	0	0	0	0	0	0	0	0	0	0	0	0	0	0	0	0
Firmicutes;Bacilli;Bacillales;Bacillaceae;Amphibacillus;Amphibacillus sp. M4-8	0	0	0	0	0	0	0	0	0	0	0	0	0	0	0	0	0	0	0	0	0	0	0	0	0	0	0	0	0	0	0	0	0	0	0	0	0	0	0	0	0	0	0	0	0	0	0	0	0
Firmicutes;Bacilli;Bacillales;Bacillaceae;Anoxybacillus;Ambiguous_taxa	0	0	0	0.146819	0	0	0	0.239023	0.104893	0.136923	0	0.0800623	0.0340075	0	0	0	0.00918476	0	0	0	0	0	0	0	0.0278237	0	0	0	0	0	0	0	0	0	0.013803	0	0	0	0	0	0	0	0	0	0	0	0	0	0
Firmicutes;Bacilli;Bacillales;Bacillaceae;Bacillus;Ambiguous_taxa	0	0	0	0.0296005	0.119162	0	0	0.196457	0.088892	0	0.0283536	0	0	0	0	0	0	0.0352016	0	0.0411811	0.0628609	0.0389171	0	0.00751004	0	0.00758305	0.03204	0	0	0	0.0124302	0.472891	0	0	0.0993816	0.0348406	0.0223943	0.214963	0.0462934	0.0500105	0	0.0311721	0	0.0386807	0	0.0177357	0.0121762	0	0.00900864
Firmicutes;Bacilli;Bacillales;Bacillaceae;Bacillus;Bacillus acidicola	0	0	0.199	0	0	0	0	0	0.0195563	0	0	0	0	0	0	0	0	0	0	0	0	0	0	0	0	0	0	0	0	0	0	0	0	0	0	0	0	0	0	0	0	0	0	0	0	0	0.00837113	0	0
Firmicutes;Bacilli;Bacillales;Bacillaceae;Bacillus;Bacillus andreraoultii	0	0	0	0	0	0	0	0	0	0	0	0	0	0	0	0	0	0	0	0	0	0	0	0	0	0	0	0	0	0	0	0	0	0	0	0	0	0	0	0	0	0	0	0	0	0.0028377	0	0	0
Firmicutes;Bacilli;Bacillales;Bacillaceae;Bacillus;Bacillus badius	0.137442	0	0	0	0	0	0	0	0	0	0	0	0	0	0	0	0	0	0	0	0.0360868	0	0	0.0100134	0.0912	0.0310905	0.0518743	0	0.054305	0	0.0180803	0.0546622	0	0	0	0.0447951	0	0	0	0	0	0	0	0	0	0	0	0	0
Firmicutes;Bacilli;Bacillales;Bacillaceae;Bacillus;Bacillus clausii	0	0	0	0	0	0	0	0	0	0	0	0	0	0	0	0	0	0	0	0	0	0	0	0	0	0	0	0	0	0	0	0	0	0	0	0	0	0	0	0	0	0.00865891	0	0	0	0	0	0	0
Firmicutes;Bacilli;Bacillales;Bacillaceae;Bacillus;Bacillus coagulans	0.164043	0	0.170138	0.176419	0.142078	0	0	0.157166	0.0408903	0.108771	0.0999836	0.0289114	0.0600132	0	0	0	0.0422499	0.0478742	0.118005	0.109816	0.240967	0.351946	0	0.0200268	0.505464	0.344271	0.24564	0.0203815	0.0749926	0.103273	0.129952	0.0788152	0.0535585	0.375949	0.480345	0.206555	0.0223943	0.22264	0.182088	0.226363	0.0325459	0	0.0153272	0.132407	0.113563	0.0574635	0.00913214	0.00951061	0.18263
Firmicutes;Bacilli;Bacillales;Bacillaceae;Bacillus;Bacillus licheniformis	0.148526	0	0.206596	0.200099	0.27499	0	0	0.0294686	0	0.0204745	0.201459	0.045591	0.0240053	0	0	0	0	0	0.044842	0.0233359	0	0	0	0	0	0	0.0091543	0	0	0	0	0	0.0220535	0.0791472	0	0	0.048521	0	0	0	0.0531013	0	0	0	0	0	0.0159812	0.0217385	0.0442242
Firmicutes;Bacilli;Bacillales;Bacillaceae;Bacillus;Bacillus megaterium	0	0	0	0	0	0	0	0	0	0	0	0	0	0	0	0	0	0	0	0	0	0	0	0	0	0	0	0	0	0	0	0	0	0	0	0	0	0	0	0	0	0	0	0	0	0	0.0175033	0	0
Firmicutes;Bacilli;Bacillales;Bacillaceae;Bacillus;Bacillus mycoides	0	0	0.21571	0	0	0	0	0	0.0604466	0	0	0	0.032007	0	0	0	0	0	0	0	0	0	0	0	0	0.0128912	0	0	0	0	0	0	0	0	0	0	0	0	0	0	0	0	0	0	0	0	0	0	0
Firmicutes;Bacilli;Bacillales;Bacillaceae;Bacillus;Bacillus pumilus	0.0288184	0.00882628	0.0227863	0.369414	1.35203	0	0	0.491143	0	0.0255931	0.295474	0	0.13603	0.0485209	0	0	0.0349021	0	0	0	0	0.0169205	0	0	0	0.0181993	0	0	0	0.0122944	0	0	0	0	0	0.0547495	0	0	0.0185174	0.0210571	0.0839343	0	0.00919634	0.0238035	0	0	0.0159812	0	0.0106466
Firmicutes;Bacilli;Bacillales;Bacillaceae;Bacillus;Bacillus sp. MH101	0	0	0.0379772	0	0	0	0	0	0	0	0	0.0389192	0	0	0	0	0	0	0	0	0	0	0	0	0	0.0288156	0	0	0	0	0	0	0	0.0865672	0	0	0	0	0	0	0	0	0	0	0	0	0	0	0
Firmicutes;Bacilli;Bacillales;Bacillaceae;Bacillus;Bacillus sp. SNN-LL-10	0	0	0	0	0	0	0	0	0	0	0	0	0	0	0	0	0	0	0	0	0	0	0	0	0	0	0	0	0	0	0	0	0	0	0	0	0	0	0	0	0	0	0	0	0	0	0	0	0
Firmicutes;Bacilli;Bacillales;Bacillaceae;Bacillus;Bacillus sp. mixed culture X7-21	0	0	0	0	0	0	0	0.101503	0	0	0	0	0	0.0351359	0	0	0	0	0	0	0	0	0	0.00751004	0	0.0265407	0	0	0	0	0	0	0	0	0	0	0	0	0	0	0	0	0	0	0	0	0	0	0
Firmicutes;Bacilli;Bacillales;Bacillaceae;Bacillus;Bacillus thermoamylovorans	0.450011	0.0511924	0.628902	0.361126	0.0458316	0	0	0.0818572	0.558242	0.0524659	0.0507379	0.132325	0.178039	0.162294	0	0	0.143282	0.0746274	0.0637228	0.0549081	0.2561	0.179357	0	0.0525703	1.1686	0.837169	0.643852	0.0639557	0.633558	0.816347	0.679142	0.878408	0.198481	0.296802	1.49348	0.266282	0.1325	0.285338	0.271588	0.273742	0.455643	0.187032	0.0531344	0.548968	0.412957	0.114927	0.0175033	0.0190212	0.24569
Firmicutes;Bacilli;Bacillales;Bacillaceae;Bacillus;Massilibacterium senegalense	0	0	0.185329	0	0	0	0	0.0360172	0	0	0	0	0	0.0167314	0	0	0	0	0	0	0	0	0	0	0.0200949	0	0.0183086	0	0	0	0	0	0	0.0395736	0	0	0	0	0	0.0131607	0	0	0	0	0	0	0	0	0
Firmicutes;Bacilli;Bacillales;Bacillaceae;Bacillus;uncultured Firmicutes bacterium	0	0	0	0	0	0	0	0	0	0	0	0	0	0	0	0	0	0	0	0	0	0	0	0	0	0	0	0	0	0	0	0	0	0	0	0	0	0	0	0	0	0	0	0	0	0	0	0	0
Firmicutes;Bacilli;Bacillales;Bacillaceae;Bacillus;uncultured Virgibacillus sp.	0	0	0	0	0	0	0	0	0	0	0	0	0	0	0	0	0	0	0	0	0	0	0	0	0	0	0	0	0	0	0	0	0.0157525	0	0	0	0	0	0	0	0	0	0	0.0386807	0	0	0	0	0.00900864
Firmicutes;Bacilli;Bacillales;Bacillaceae;Bacillus;uncultured bacterium	0.693859	0.0255962	0.218749	0.399015	0.0366653	0	0	0.271766	0	0.117728	0.319351	0.135661	0.0940207	0.17066	0	0	0.284728	0.042946	0.0141606	0.0398084	0	0.0659898	0	0.0438086	0.0757424	0.180477	0	0.0168674	0.0323244	0.137697	0.0282505	0.0864425	0.0535585	0	0.133889	0.0833686	0.0989083	0.177856	0.0740695	0.121078	0.154165	0.152397	0.0204363	0.71113	0.203897	0.0510787	0.0722961	0	0.180173
Firmicutes;Bacilli;Bacillales;Bacillaceae;Bacillus;uncultured compost bacterium	0.738196	0.0273615	0.358505	0.663051	0.802053	0	0	0.438754	0.359124	0.165076	0.288012	0.244635	0.368081	0.339647	0	0	0.178184	0.0901161	0.0991244	0.0823621	0.119901	0.0761421	0	0.0112651	0.196312	0.102371	0.157149	0	0.0426682	0.149991	0.175153	0.3356	0.384361	0.111301	0.176678	0.255083	0.0373239	0.440162	0.21295	0.181617	0.700594	0.413896	0.0848107	1.46392	1.92025	0.096482	0.00837113	0.0489117	0.0778019
Firmicutes;Bacilli;Bacillales;Bacillaceae;Bacillus;uncultured soil bacterium	0.0354689	0	0	0	0	0	0	0.101503	0	0	0	0	0	0	0	0	0	0	0	0	0.0186254	0	0	0.0187751	0	0	0	0	0	0	0	0	0	0	0	0	0	0.0435044	0	0	0	0	0	0	0	0	0	0	0
Firmicutes;Bacilli;Bacillales;Bacillaceae;Bacillus;__	0.86012	0.0635492	0.650169	1.98797	0.701224	0	0.14081	1.77794	0.723581	0.346787	0.244736	0.523741	1.84241	0.393187	0.0407814	0	0.176347	0.221066	0.259612	0.208651	0.295679	0.382403	0	0.103889	0.471457	0.583895	0.454663	0.0913653	0.424096	0.304901	0.159333	0.903833	0.585993	0.50951	0.502429	0.262549	0.0597182	0.410733	0.447503	0.392188	0.751983	0.147201	0.0490472	0.302007	0.665892	0.12415	0.0745792	0.0339665	0.315302
Firmicutes;Bacilli;Bacillales;Bacillaceae;Caldibacillus;Geobacillus sp. ARB04	0	0	0	0	0.18791	0	0	0	0	0	0	0	0	0	0	0	0	0.0147847	0	0.0356903	0.00814863	0	0	0.00876172	0.0108203	0	0	0	0	0	0.0214704	0.00762728	0.018903	0.0296802	0.0207045	0	0	0	0	0	0	0.0207814	0	0.121993	0.0206478	0	0	0	0
Firmicutes;Bacilli;Bacillales;Bacillaceae;Calditerricola;Ambiguous_taxa	0	0	0	0.13261	0	0	0	0.0392914	0	0	0	0	0	0.0167314	0	0	0	0	0	0	0	0	0	0.00751004	0.0247322	0	0	0	0	0	0	0	0	0	0	0	0	0	0	0	0	0	0	0	0	0	0	0	0
Firmicutes;Bacilli;Bacillales;Bacillaceae;Calditerricola;Calditerricola yamamurae	0	0	0.0850689	0	0.0916632	0	0	0	0	0	0	0	0	0	0	0	0.0349021	0.0767395	0	0.00411811	0	0.0152284	0	0	0	0.0159244	0.0167829	0	0	0	0	0	0	0.0618337	0.0469302	0.0348406	0	0.0319885	0	0.16056	0	0	0	0.0119018	0	0	0	0	0.0401294
Firmicutes;Bacilli;Bacillales;Bacillaceae;Cerasibacillus;Ambiguous_taxa	0	0	0	0	0	0	0	0	0	0	0	0	0	0	0	0	0	0	0	0.0192178	0.0372509	0	0	0	0.0556474	0.0257824	0.0472972	0	0	0.019671	0	0	0	0.0222601	0	0.0248861	0	0.0179136	0.0308623	0	0	0	0	0	0	0.00354713	0	0	0
Firmicutes;Bacilli;Bacillales;Bacillaceae;Cerasibacillus;uncultured Bacillaceae bacterium	0	0	0	0	0	0	0	0	0	0	0	0	0	0	0	0	0	0	0	0	0	0	0	0	0	0	0	0	0	0	0	0	0	0	0	0	0	0	0	0	0	0	0	0	0	0	0	0	0
Firmicutes;Bacilli;Bacillales;Bacillaceae;Cerasibacillus;uncultured bacterium	0	0	0.0319008	0.10893	0	0	0	0	0.136894	0	0	0	0	0	0	0	0	0.0140806	0.0377617	0	0.0325945	0.0253807	0	0	0	0.0310905	0	0.00491967	0	0	0.0180803	0.0406788	0	0	0.0772968	0	0	0	0	0.0447463	0	0	0	0.111579	0.0851723	0	0.00456607	0	0
Firmicutes;Bacilli;Bacillales;Bacillaceae;Cerasibacillus;__	0	0	0	0	0	0	0	0	0	0.00639828	0	0.0322473	0.0260057	0	0	0	0	0	0	0	0	0	0	0	0	0	0	0	0	0	0	0	0	0	0	0	0	0	0	0	0	0	0	0	0	0	0	0	0
Firmicutes;Bacilli;Bacillales;Bacillaceae;Geobacillus;Ambiguous_taxa	0.212813	0	0.129122	0.0935376	0	0	0	0	0	0.0179152	0	0	0.108024	0	0	0	0.101032	0	0	0	0	0.0203046	0	0	0	0	0.0244115	0	0	0	0	0	0.094515	0	0.069015	0	0	0	0.101846	0	0	0	0	0.0833123	0.0980772	0.0163168	0	0.0217385	0
Firmicutes;Bacilli;Bacillales;Bacillaceae;Geobacillus;Parageobacillus toebii	5.17845	0.146516	2.50194	7.61799	3.03864	0	0	5.90027	3.05433	0.527218	2.23844	0.966307	2.52055	1.24147	0	0	1.24913	1.46861	0.45314	0.597126	0.289858	0.199662	0.00261172	0.235315	0.596664	0.610436	0.591978	0.143373	0.215927	0.304901	0.5684	1.33732	1.72962	2.38678	1.49901	1.19454	0.628907	1.32433	4.67872	1.64772	1.02605	0.164519	0.0337199	1.01314	0.833656	0.187289	0.512922	0.0855955	0.713321
Firmicutes;Bacilli;Bacillales;Bacillaceae;Geobacillus;__	0	0	0.13368	0.234436	0.0320821	0	0	0	0	0.0243135	0	0	0	0.0351359	0	0	0	0	0	0.0260813	0	0	0	0.0175234	0.0386441	0	0	0.0070281	0	0	0	0.0292379	0.0283545	0.0247335	0	0	0	0.0294295	0	0	0	0	0	0.0728982	0.10582	0	0.00608809	0	0.0180173
Firmicutes;Bacilli;Bacillales;Bacillaceae;Hydrogenibacillus;Hydrogenibacillus schlegelii	0	0	0.139756	0.116034	0	0	0	0	0	0	0.0268613	0	0	0.0334627	0	0	0.00918476	0	0	0.0178451	0	0	0	0	0	0	0.0961201	0	0.00775785	0	0.00791014	0.077544	0.0913645	0.0519403	0	0	0	0.0204727	0	0	0	0	0	0	0	0	0	0	0
Firmicutes;Bacilli;Bacillales;Bacillaceae;Oceanobacillus;Ambiguous_taxa	0	0	0	0	0	0	0	0	0	0	0.025369	0	0	0	0	0	0	0	0	0	0.00814863	0	0	0	0	0	0	0.00210843	0	0	0	0.0114409	0	0	0	0	0	0.0460635	0	0	0	0	0	0	0	0	0	0	0
Firmicutes;Bacilli;Bacillales;Bacillaceae;Oceanobacillus;Oceanobacillus caeni	0	0	0	0	0	0	0	0	0.010667	0.00895759	0.0492456	0	0	0.0284433	0	0	0	0.00704032	0	0	0.00582045	0	0	0	0	0.00606644	0	0	0	0	0	0	0	0.0247335	0	0	0	0	0	0	0	0	0	0	0	0	0	0	0.00573277
Firmicutes;Bacilli;Bacillales;Bacillaceae;Oceanobacillus;uncultured bacterium	0	0	0	0	0	0	0	0	0	0	0	0	0	0	0	0	0	0	0	0	0	0	0	0	0	0	0	0	0	0	0	0	0	0	0	0	0	0	0	0	0	0	0	0	0	0	0	0	0
Firmicutes;Bacilli;Bacillales;Bacillaceae;Oceanobacillus;__	0	0	0	0	0	0	0	0.04584	0	0	0	0	0	0	0	0	0	0.0352016	0	0.00823621	0	0	0	0	0.0881085	0	0	0	0.0116368	0	0	0	0	0	0	0	0	0	0	0	0	0	0	0	0	0	0	0	0
Firmicutes;Bacilli;Bacillales;Bacillaceae;Pseudogracilibacillus;Ambiguous_taxa	0	0	0	0	0	0	0	0	0	0	0	0	0	0	0	0	0	0.0415379	0.0306814	0	0.0186254	0	0	0	0.239593	0	0	0	0	0	0	0	0	0	0	0	0	0	0	0	0	0	0	0	0	0	0	0	0
Firmicutes;Bacilli;Bacillales;Bacillaceae;Pseudogracilibacillus;uncultured bacterium	0	0	0	0	0	0	0	0	0	0	0	0	0	0	0	0	0	0	0	0	0	0	0	0	0	0	0	0	0	0	0	0	0	0	0	0	0	0	0	0	0	0	0	0	0	0	0	0	0.0204742
Firmicutes;Bacilli;Bacillales;Bacillaceae;Pseudogracilibacillus;__	0	0	0	0.0260485	0	0	0	0	0	0	0	0	0	0	0	0	0.0128587	0.00844838	0	0	0	0	0	0	0.0386441	0	0	0	0	0	0	0	0	0	0	0	0	0	0	0	0.0565272	0	0	0	0	0	0	0	0
Firmicutes;Bacilli;Bacillales;Bacillaceae;Sinibacillus;__	0	0	0	0	0	0	0	0	0	0	0	0.0111198	0	0	0	0	0	0.00844838	0	0	0	0	0	0	0.00618305	0	0	0	0	0	0	0.0470349	0	0	0	0	0	0	0.0154311	0	0	0	0	0	0	0	0.0167423	0	0.00818967
Firmicutes;Bacilli;Bacillales;Bacillaceae;Ureibacillus;Ambiguous_taxa	0.611838	0.201239	0.592444	1.64105	1.59494	0	0	1.70918	1.39561	0.229058	0.423811	0.474814	1.55834	0.234239	0	0	0.481281	0.344976	0.134526	0.424165	0.985984	1.15228	0	0.0751004	2.64016	2.88459	2.07345	0.448393	2.61698	4.66449	2.21597	2.12801	1.53744	2.71079	5.339	3.05602	1.49669	2.53989	3.1387	2.04517	3.28885	1.27113	0.235018	7.03245	7.63711	0.810874	0.201668	0.173908	1.09086
Firmicutes;Bacilli;Bacillales;Bacillaceae;Virgibacillus;Ambiguous_taxa	0	0	0	0	0	0	0	0	0	0	0	0	0	0	0	0	0	0	0	0	0	0	0	0	0	0	0	0	0	0	0	0	0	0	0	0	0	0	0	0	0	0	0	0	0	0	0	0	0
Firmicutes;Bacilli;Bacillales;Bacillaceae;Virgibacillus;Lentibacillus massiliensis	0.0155176	0	0	0	0	0	0	0.108051	0	0	0	0	0	0	0	0	0	0	0	0	0	0	0	0	0	0	0	0	0	0	0	0	0	0	0	0	0	0	0	0	0	0	0	0	0	0	0	0	0
Firmicutes;Bacilli;Bacillales;Bacillaceae;Virgibacillus;bacterium K2-60	0	0	0	0	0	0	0	0	0	0	0	0	0	0	0	0	0	0	0	0	0	0	0	0	0	0	0	0	0	0	0.00452008	0	0	0	0	0	0	0	0	0	0	0	0	0	0	0	0	0	0
Firmicutes;Bacilli;Bacillales;Bacillaceae;Virgibacillus;uncultured Bacillaceae bacterium	0	0	0	0	0	0	0	0	0	0	0	0	0	0	0	0	0	0	0	0	0	0	0	0	0	0	0	0.00562248	0	0	0	0	0	0	0	0	0	0	0	0	0	0	0	0	0	0	0	0	0
Firmicutes;Bacilli;Bacillales;Bacillaceae;uncultured;uncultured Bacillus sp.	0	0	0	0	0	0	0	0	0	0	0	0	0	0	0	0	0	0	0	0	0	0	0	0	0	0	0	0	0	0	0	0	0	0	0	0	0	0.0243113	0	0	0	0	0	0	0	0	0	0	0
Firmicutes;Bacilli;Bacillales;Bacillaceae;uncultured;uncultured bacterium	0.0598537	0	0	0.0710412	0	0	0	0.373269	0.0124449	0	0.0193998	0	0	0	0	0	0.0257173	0.066179	0	0.00960892	0	0	0	0	0	0.0128912	0.0793372	0.00421686	0	0	0.00339006	0.00889849	0	0.0272068	0.0427893	0	0	0	0	0	0	0	0	0	0	0	0	0	0.0049138
Firmicutes;Bacilli;Bacillales;Bacillaceae;uncultured;__	0	0	0	0	0	0	0	0	0	0	0	0	0	0	0	0	0	0	0	0	0	0	0	0	0	0	0	0	0	0	0	0	0	0	0	0	0	0	0	0	0	0	0	0	0	0	0	0	0
Firmicutes;Bacilli;Bacillales;Bacillaceae;__;__	0.230548	0	0.0957025	0.0639371	1.19162	0	0	0.27504	0.0195563	0.0217542	0	0.0500389	0.0780172	0	0	0	0	0.0190089	0	0	0.0267741	0	0	0	0.471457	0	0.0091543	0.00421686	0.0219806	0	0.0101702	0	0.103966	0.123667	0.0358878	0.0398178	0.1325	0.0934065	0.0277761	0.0184249	0.79138	0.358479	0.0653962	1.49069	0.81817	0.102867	0.0167423	0.0652156	0
Firmicutes;Bacilli;Bacillales;Family X;Thermicanus;Ambiguous_taxa	0	0	0	0	0	0	0	0	0	0	0	0	0	0	0	0	0	0	0	0.0219632	0	0	0	0	0	0	0	0	0	0	0	0	0	0	0	0	0.00746478	0	0	0	0	0	0	0	0	0	0	0	0
Firmicutes;Bacilli;Bacillales;Family XII;Exiguobacterium;Ambiguous_taxa	0	0	0	0	0	0	0	0	0	0	0	0	0	0	0	0	0	0	0	0	0	0	0	0	0	0	0	0	0	0	0	0.00381364	0	0	0	0	0	0	0	0	0	0	0	0	0	0	0	0	0
Firmicutes;Bacilli;Bacillales;Family XII;Exiguobacterium;Exiguobacterium indicum	0	0	0	0	0	0	0	0	0	0	0	0	0	0	0	0	0	0	0	0	0	0	0	0	0	0	0	0	0	0	0	0	0	0	0	0	0	0	0	0	0	0	0	0	0	0	0	0	0
Firmicutes;Bacilli;Bacillales;Listeriaceae;Brochothrix;Ambiguous_taxa	0	0	0	0.146819	0.0320821	0	0	0.130971	0.634689	0.0537456	0	0.0211275	0.0720158	0.00669254	1.60889	0.284837	0	0	0	0	0	0	0	0	0	0	0	0	0	0	0	0	0	0	0	0	0	0	0	0	0	0	0	0	0	0	0	0	0
Firmicutes;Bacilli;Bacillales;Listeriaceae;Listeria;Listeria monocytogenes	0	0	0.0410154	0.0296005	0	0	0	0	0	0	0.138783	0.00667186	0	0	0	0	0	0	0.0165207	0.0205905	0	0	0	0.0275368	0	0	0	0.0161646	0.0555979	0	0	0.0101697	0	0	0	0	0.0298591	0	0	0	0.351154	0	0	0	0.136792	0	0	0.0203799	0
Firmicutes;Bacilli;Bacillales;Paenibacillaceae;Aneurinibacillus;Ambiguous_taxa	0.234981	0.037953	0.355466	0.364678	0.701224	0	0	0.38964	0.232897	0.0179152	0.0492456	0.0333593	0.202044	0.435015	0	0	0	0.0725153	0.0141606	0	0.0151332	0.0524535	0	0.0225301	0.0633763	0.0841719	0.0381429	0.0070281	0	0.0639308	0.00904016	0.0381364	0.081913	0.118721	0.0703953	0.195356	0.108239	0.0524612	0.126535	0.200042	0.102777	0	0	0.00595088	0.139373	0.00780369	0.0745792	0	0.0294828
Firmicutes;Bacilli;Bacillales;Paenibacillaceae;Aneurinibacillus;uncultured synthetic wastewater bacterium tmbr15-12	0	0	0	0	0	0	0	0	0	0	0	0	0.0660145	0	0	0	0	0	0	0	0	0	0	0	0	0	0	0	0	0.0418009	0	0	0	0	0	0	0	0	0	0	0	0	0	0	0	0	0	0	0
Firmicutes;Bacilli;Bacillales;Paenibacillaceae;Brevibacillus;Ambiguous_taxa	0	0	0.11697	0	0	0	0	0	0	0	0	0	0.0300066	0	0	0	0	0	0	0.0260813	0	0	0	0	0	0	0	0	0	0	0	0.0495773	0	0.049467	0	0	0	0	0	0	0	0	0	0	0.0258098	0	0	0	0
Firmicutes;Bacilli;Bacillales;Paenibacillaceae;Brevibacillus;Brevibacillus agri	0.0155176	0	0.367619	0	0.114579	0	0	0	0	0	0.0193998	0.0133437	0.510112	0	0	0	0	0	0	0.00686351	0	0.0169205	0	0	0.0340068	0	0.01068	0.00843372	0	0	0	0	0.044107	0	0.013803	0	0	0	0	0.0552748	0	0	0	0	0	0.00212828	0	0	0
Firmicutes;Bacilli;Bacillales;Paenibacillaceae;Brevibacillus;Brevibacillus borstelensis	0	0	0	0.100642	0	0	0	0.0523886	0	0	0	0	0	0	0	0	0	0	0.00708031	0	0	0	0	0	0	0	0	0	0	0	0	0	0	0	0	0	0	0	0	0	0	0	0	0	0	0	0.00989315	0	0
Firmicutes;Bacilli;Bacillales;Paenibacillaceae;Brevibacillus;Brevibacillus sp.	0	0	0	0	0	0	0	0	0	0	0	0	0	0	0	0	0	0	0	0	0	0	0	0	0	0	0	0	0	0	0	0	0	0	0	0	0	0	0	0	0	0	0	0	0	0	0.0266354	0	0
Firmicutes;Bacilli;Bacillales;Paenibacillaceae;Brevibacillus;uncultured synthetic wastewater bacterium tmbr11-7	0.0864553	0	0	0.505577	0	0	0	0	0	0	0	0	0	0	0	0	0	0	0	0	0	0	0	0	0	0.00985797	0	0	0	0	0	0	0	0	0	0	0	0	0	0	0	0	0	0	0	0.0127697	0.0144592	0	0
Firmicutes;Bacilli;Bacillales;Paenibacillaceae;Brevibacillus;__	0	0	0	0	0	0	0	0	0	0	0	0	0	0	0	0	0	0	0	0	0	0	0	0	0	0	0	0	0	0	0	0	0	0	0	0.00995446	0	0	0	0	0	0	0	0	0	0	0	0	0.0122845
Firmicutes;Bacilli;Bacillales;Paenibacillaceae;Paenibacillus;Ambiguous_taxa	0	0	0	0	0	0	0	0	0	0	0	0	0	0	0	0	0	0	0	0	0	0	0	0	0	0	0	0	0	0	0	0	0	0	0	0.00995446	0	0	0.0833282	0	0	0	0	0	0.0954962	0	0	0	0.0122845
Firmicutes;Bacilli;Bacillales;Paenibacillaceae;Paenibacillus;Bacillus tipchiralis	0	0	0	0	0	0	0	0	0	0	0	0	0	0	0	0	0	0	0	0	0	0	0	0	0	0	0	0	0	0	0	0	0	0	0	0	0	0	0	0	0	0	0	0	0	0	0	0	0
Firmicutes;Bacilli;Bacillales;Paenibacillaceae;Paenibacillus;Paenibacillus camelliae	0	0	0	0	0	0	0	0	0	0.0127966	0	0	0	0	0	0	0	0	0	0	0	0	0	0	0	0	0	0	0	0	0	0	0	0.0098934	0	0	0	0	0	0	0	0	0	0	0.0387147	0	0	0	0
Firmicutes;Bacilli;Bacillales;Paenibacillaceae;Paenibacillus;Paenibacillus chinensis	0	0	0	0	0	0	0	0	0	0	0	0	0	0	0	0	0	0	0	0	0	0	0	0.0112651	0	0	0	0	0	0	0	0	0	0	0	0	0.0111972	0	0	0	0.22097	0	0	0	0	0	0	0	0
Firmicutes;Bacilli;Bacillales;Paenibacillaceae;Paenibacillus;Paenibacillus macerans	0	0	0	0	0	0	0	0	0	0	0	0	0	0	0	0	0	0	0	0	0	0	0	0	0	0	0	0	0	0	0	0	0	0	0	0	0	0	0	0	0	0	0	0	0	0	0	0	0
Firmicutes;Bacilli;Bacillales;Paenibacillaceae;Paenibacillus;Paenibacillus sp. DF 9R	0	0	0	0	0	0	0	0	0	0	0	0	0	0	0	0	0	0	0	0	0	0	0	0	0	0	0	0	0	0	0	0	0	0	0	0	0	0	0	0	0	0	0	0	0	0	0	0	0
Firmicutes;Bacilli;Bacillales;Paenibacillaceae;Paenibacillus;Paenibacillus sp. J-16	0	0	0	0	0	0	0	0.104777	0	0	0	0	0	0	0	0	0	0	0	0	0	0	0	0	0	0	0	0	0	0	0	0	0	0	0	0	0	0.0191931	0	0	0	0	0	0	0	0	0	0	0
Firmicutes;Bacilli;Bacillales;Paenibacillaceae;Paenibacillus;Paenibacillus sp. NBGD50	0	0	0	0	0	0	0	0	0	0	0	0	0	0	0	0	0	0	0	0	0	0	0	0	0	0	0	0	0	0	0	0	0	0	0	0	0	0	0	0	0	0	0	0	0	0	0	0	0
Firmicutes;Bacilli;Bacillales;Paenibacillaceae;Paenibacillus;Paenibacillus sp. SJH06	0	0	0	0	0	0	0	0	0	0	0	0	0	0	0	0	0	0	0	0	0	0	0	0	0	0	0	0	0	0	0	0	0	0	0	0	0	0	0	0	0	0	0	0	0	0	0	0	0
Firmicutes;Bacilli;Bacillales;Paenibacillaceae;Paenibacillus;uncultured synthetic wastewater bacterium tmbr15-20	0	0	0	0	0.233741	0	0	0.0425657	0	0	0	0	0	0	0	0	0	0	0	0	0	0	0	0	0	0	0	0.00421686	0	0	0	0	0	0	0	0	0	0	0	0	0	0	0	0	0	0	0	0	0
Firmicutes;Bacilli;Bacillales;Paenibacillaceae;Paenibacillus;__	0.152959	0	0.361543	0.14445	0.242908	0	0	0.373269	0.42846	0.0473473	0	0.117869	0.068015	0.127158	0	0	0.17451	0	0	0	0.0570404	0	0	0	0.0618305	0.081897	0.0167829	0	0.00775785	0.0467186	0.0429408	0	0	0.0692538	0.027606	0.176692	0	0.0486226	0.0462934	0	0.0205553	0	0	0.0342175	0.0851723	0	0	0	0.0540518
Firmicutes;Bacilli;Bacillales;Paenibacillaceae;Saccharibacillus;__	0	0	0	0	0	0	0	0	0	0	0	0	0.0160035	0	0	0	0	0	0	0	0	0	0	0	0	0	0	0	0	0	0	0	0	0	0	0	0	0	0	0	0	0	0	0	0	0	0	0	0
Firmicutes;Bacilli;Bacillales;Paenibacillaceae;Thermobacillus;Ambiguous_taxa	0	0	0	0	0	0	0	0	0	0	0	0	0	0	0	0	0	0	0	0	0	0	0	0	0	0	0	0	0	0	0	0	0	0	0	0	0	0	0	0	0	0	0	0	0	0	0.00304405	0	0
Firmicutes;Bacilli;Bacillales;Paenibacillaceae;Thermobacillus;__	0.195079	0	0	0.131426	0	0	0	0.140794	0	0	0	0	0	0	0	0	0	0	0	0	0	0	0	0	0.0139119	0	0.00457715	0	0	0	0	0	0	0	0.0193242	0	0	0	0	0	0	0	0	0	0	0	0	0	0
Firmicutes;Bacilli;Bacillales;Paenibacillaceae;__;__	0	0	0	0	0	0	0	0	0	0	0	0	0	0	0	0	0	0	0	0	0	0	0	0	0	0	0	0	0	0	0	0	0.113418	0	0	0	0	0	0	0	0	0	0	0	0	0	0	0	0.0204742
Firmicutes;Bacilli;Bacillales;Planococcaceae;Bhargavaea;Ambiguous_taxa	0	0	0	0	0	0	0	0	0	0	0	0	0	0	0	0	0	0	0	0	0	0	0	0	0	0	0	0	0	0	0	0	0.025204	0	0	0	0	0	0	0	0	0	0	0	0	0	0	0	0
Firmicutes;Bacilli;Bacillales;Planococcaceae;Kurthia;Ambiguous_taxa	0.261583	0	0	0	0	0	0	0	0	0.157398	0	0	0	0	0	0	0	0	0	0	0	0	0	0	0	0	0	0	0	0	0	0	0	0	0.0151833	0.0174203	0	0	0	0	0	0	0	0	0.0851723	0	0	0	0.0663363
Firmicutes;Bacilli;Bacillales;Planococcaceae;Kurthia;Kurthia sp. PAOGL173	0.0975393	0.0105915	0.153428	0.251012	0.0870801	0	0	0.635212	0.759138	0.188109	0.0775992	0	0	0	0	0	0	0	0.365816	0.109816	0.119901	0.037225	0	0.153956	0.0618305	0.0227492	0.0717086	0.0119478	0.0465471	0.132779	0.0372907	0	0.0346555	0	0.0993816	0	0	0	0	0	0.0513883	0.00692713	0	0.0238035	0	0.0347619	0	0	0.00655174
Firmicutes;Bacilli;Bacillales;Planococcaceae;Kurthia;uncultured bacterium	0.0443361	0	0.195962	0	0.0916632	0	0	0.307783	0	0.18427	0	0.0144557	0.236052	0.0234239	0	0	0.0716411	0	0	0	0.0221177	0	0	0	0	0	0	0	0	0	0.0384207	0	0	0	0.0151833	0	0	0.0383862	0.0555521	0	0	0	0	0	0	0	0.00913214	0	0.0122845
Firmicutes;Bacilli;Bacillales;Planococcaceae;Kurthia;__	0	0.00529577	0	0	0	0	0	0	0	0	0	0	0	0	0	0	0	0	0	0	0	0	0	0	0	0	0	0	0	0	0	0	0	0	0	0	0	0	0	0	0	0	0	0	0	0	0	0	0
Firmicutes;Bacilli;Bacillales;Planococcaceae;Lysinibacillus;Ambiguous_taxa	0	0	0	0.0509129	0.114579	0	0	0.0491143	0	0.0550252	0	0	0.0360079	0.0284433	0	0	0.0606194	0.0302734	0	0.0233359	0.0151332	0	0	0.0112651	0	0.0204742	0	0	0	0	0.0146903	0.0190682	0	0.0395736	0	0.097056	0	0.0332681	0	0	0	0	0	0	0.0438766	0	0	0	0.0229311
Firmicutes;Bacilli;Bacillales;Planococcaceae;Lysinibacillus;Bacillus ndiopicus	0	0	0	0	0	0	0	0	0	0	0	0.044479	0	0	0	0	0	0	0	0	0	0	0	0	0	0	0	0	0	0	0	0	0	0	0	0	0	0	0	0	0	0	0	0	0	0	0	0	0
Firmicutes;Bacilli;Bacillales;Planococcaceae;Lysinibacillus;Lysinibacillus sphaericus	0	0	0	0	0	0	0	0	0	0	0	0	0	0	0	0	0	0	0	0	0	0	0	0	0	0	0	0	0	0	0	0	0	0	0	0	0	0	0	0	0	0	0	0	0	0	0	0	0
Firmicutes;Bacilli;Bacillales;Planococcaceae;Lysinibacillus;__	0	0	0	0.0331526	0.288739	0	0	0.0753086	0	0.0204745	0	0	0	0.0769643	0	0	0	0	0.0212409	0.0288268	0.0407432	0	0	0	0	0.00606644	0.02136	0.00913653	0	0	0.00678012	0.13602	0.0346555	0.133561	0	0	0.130634	0	0	0	0.0205553	0	0	0	0	0	0.00761012	0	0.0139224
Firmicutes;Bacilli;Bacillales;Planococcaceae;Rummeliibacillus;Ambiguous_taxa	0	0	0	0	0	0	0	0	0	0	0	0	0	0	0	0	0	0	0	0	0	0	0	0	0	0	0	0	0	0	0.0113002	0	0	0	0	0	0	0	0	0	0	0	0	0	0	0	0	0	0
Firmicutes;Bacilli;Bacillales;Planococcaceae;Rummeliibacillus;__	0	0	0	0	0	0	0	0	0	0	0	0	0	0	0	0	0	0	0	0	0	0	0	0	0	0	0	0	0	0	0	0	0	0	0	0	0	0	0	0	0	0	0	0	0	0	0	0	0
Firmicutes;Bacilli;Bacillales;Planococcaceae;Savagea;Ambiguous_taxa	0.523166	0.0114742	0.145832	0.278245	0.219992	0	0	0.163714	0.0426682	0.120288	0.102968	0.289114	0.232051	0.428323	0	0	0.255336	0.0380177	0.068443	0.123543	0.0919631	0.0118443	0	0.0237818	0.0772881	0.160761	0.0717086	0.0274096	0.0775785	0.0860606	0.0339006	0.0889849	0.037806	0.128614	0.404428	0.124431	0.28926	0.0115159	0.154311	0.178985	0.207266	0	0.00715271	0.0282667	0.232288	0	0.0547929	0	0.0327587
Firmicutes;Bacilli;Bacillales;Planococcaceae;Sporosarcina;Ambiguous_taxa	0	0	0	0	0	0	0	0	0.0284455	0.0140762	0	0.0689425	0	0	0	0	0	0.0260492	0	0.00960892	0	0	0	0	0.032461	0	0.0472972	0	0	0.0221299	0	0.0228818	0	0	0	0	0	0	0	0	0	0	0	0	0	0	0	0	0.0122845
Firmicutes;Bacilli;Bacillales;Planococcaceae;Sporosarcina;uncultured Firmicutes bacterium	0.0509865	0.00706102	0	0.0485448	0.109996	0	0	0.189909	0	0.0255931	0.0208921	0.0789503	0.154034	0.0635792	0	0	0	0	0	0	0	0	0	0	0	0	0.0152572	0	0	0	0	0	0	0	0	0	0	0	0	0	0	0	0	0	0	0	0.00380506	0	0
Firmicutes;Bacilli;Bacillales;Planococcaceae;Sporosarcina;uncultured bacterium	0	0	0	0	0	0	0	0	0	0	0	0	0	0	0	0	0.0128587	0.0105605	0	0	0	0.0135364	0	0	0.0123661	0.0288156	0	0.00562248	0	0	0.0203404	0.110596	0	0	0	0	0	0	0	0	0	0	0	0.0505824	0	0	0	0	0
Firmicutes;Bacilli;Bacillales;Planococcaceae;Sporosarcina;__	0	0	0	0.0722252	0.302489	0	0	0	0.033779	0	0	0	0.186041	0.174006	0	0	0	0	0	0	0	0.00846024	0	0.0237818	0.111295	0.0189576	0.0472972	0	0.0103438	0	0.0135602	0.0686455	0.0157525	0.0272068	0.0193242	0	0.0391901	0	0	0	0	0	0	0.0119018	0	0	0	0	0
Firmicutes;Bacilli;Bacillales;Planococcaceae;__;__	0.168477	0	0	0	0	0	0	0.0261943	0.661357	0	0	0	0.018004	0	0	0	0.0973585	0.0337935	0	0.0356903	0	0.0219966	0	0	0	0	0	0	0.0142227	0	0	0.0114409	0	0	0	0	0	0	0.0493797	0	0.0445366	0	0	0.0669473	0	0	0.0182643	0	0.0303018
Firmicutes;Bacilli;Bacillales;Staphylococcaceae;Aliicoccus;Ambiguous_taxa	0	0	0	0	0	0	0	0	0	0	0	0	0	0	0	0	0	0	0	0	0	0	0	0	0	0	0	0	0	0	0	0	0	0	0	0	0	0	0	0	0	0	0	0	0	0	0	0	0
Firmicutes;Bacilli;Bacillales;Staphylococcaceae;Jeotgalicoccus;Ambiguous_taxa	0	0.00264788	0.0151909	0.0236804	0.453733	0	0	0	0	0	0	0.102302	0	0	0	0	0	0	0	0.0123543	0	0	0	0	0	0	0	0.00913653	0	0.0098355	0	0	0	0	0	0	0	0	0	0	0	0	0	0	0	0	0.00761012	0	0
Firmicutes;Bacilli;Bacillales;Staphylococcaceae;Jeotgalicoccus;uncultured bacterium	0	0	0	0	0	0	0	0	0	0	0	0	0	0	0	0	0	0	0	0	0	0	0	0	0	0.00606644	0	0	0	0	0	0	0	0	0	0	0	0	0	0	0	0	0	0	0	0	0	0	0
Firmicutes;Bacilli;Bacillales;Staphylococcaceae;Jeotgalicoccus;__	0	0	0	0	0	0	0	0	0	0	0	0	0	0	0	0	0	0.00985645	0	0	0	0	0	0	0	0	0	0	0	0	0	0	0	0	0	0	0	0	0	0	0	0	0	0	0	0	0	0	0
Firmicutes;Bacilli;Bacillales;Staphylococcaceae;Macrococcus;Ambiguous_taxa	0.219464	0.00882628	0	0.152739	0.0595811	0	0	0.02292	0.195563	0.0294321	0	0.093406	0.0620136	0.0401553	0	0	0	0.0168968	0.0283213	0.0411811	0	0	0	0.00876172	0.00463729	0	0	0.00632529	0	0.0172121	0.0146903	0	0	0.0544137	0	0	0	0	0.0833282	0.0131607	0	0.0294403	0	0	0	0.00496598	0	0	0.00573277
Firmicutes;Bacilli;Bacillales;Staphylococcaceae;Macrococcus;Macrococcus caseolyticus	0	0	0	0	0	0	0	0	0.0835585	0.0396693	0.0268613	0	0.0760167	0	0	0	0	0	0	0	0	0.00846024	0	0	0	0	0	0	0	0	0	0	0	0	0	0	0	0	0	0	0	0	0	0	0	0	0	0	0
Firmicutes;Bacilli;Bacillales;Staphylococcaceae;Nosocomiicoccus;uncultured bacterium	0	0	0	0	0	0	0	0	0.108448	0.0294321	0	0	0.0780172	0	0	0	0	0	0	0.0301995	0.00349227	0.0186125	0	0	0	0	0.0091543	0	0	0	0	0.0292379	0	0	0.0262257	0	0	0.113879	0	0	0	0	0	0	0	0	0	0	0
Firmicutes;Bacilli;Bacillales;Staphylococcaceae;Staphylococcus;Ambiguous_taxa	0.0133008	0.0255962	0	0.143266	0.339154	0	0	0	0.0231119	0.0652625	0.0343227	0.0400311	0	0	0	0	0	0	0.0377617	0	0.0325945	0.0152284	0	0	0	0	0.0411943	0.00632529	0	0.019671	0.0124302	0	0.0535585	0.356162	0.0579726	0.0510166	0	0.136911	0.13888	0.155296	0.0890731	0	0	0.0267789	0.0954962	0	0.00532708	0	0.0450432
Firmicutes;Bacilli;Bacillales;Staphylococcaceae;Staphylococcus;Staphylococcus aureus	0	0	0.448131	0.478344	0	0	0	0	0	0	0	0	0	0	0	0	0	0	0.0330415	0	0.0442354	0.0203046	0	0.0400536	0	0	0	0	0.0982661	0.0663896	0.00904016	0.0584758	0	0	0	0.0871015	0.0186619	0	0.040121	0	0.27921	0	0	0	0.0851723	0	0	0	0.0270259
Firmicutes;Bacilli;Bacillales;Staphylococcaceae;Staphylococcus;Staphylococcus kloosii	0	0	0	0	0	0	0	0	0	0	0	0	0	0	0	0	0	0	0	0	0	0	0	0	0	0	0	0	0	0	0	0	0.0535585	0	0.0165636	0	0	0	0	0	0	0	0	0	0	0	0	0	0
Firmicutes;Bacilli;Bacillales;Staphylococcaceae;Staphylococcus;Staphylococcus sciuri	0	0	0	0.298373	1.25579	0	0	0	0	0	0	0	0	0	0	0	0	0	0.0141606	0	0	0	0	0	0	0	0	0.00491967	0	0	0	0	0.018903	0	0	0.0174203	0	0.0435044	0	0	0	0	0	0	0	0	0	0	0
Firmicutes;Bacilli;Bacillales;Staphylococcaceae;Staphylococcus;Staphylococcus sp.	0	0	0	0	0	0	0	0	0.0320011	0	0	0	0	0	0	0	0	0	0	0	0	0	0	0	0	0	0	0	0	0	0	0	0	0	0	0	0	0	0	0	0	0	0	0	0	0	0	0	0
Firmicutes;Bacilli;Bacillales;Staphylococcaceae;Staphylococcus;Staphylococcus sp. MRC5-3-1	0	0.00529577	0.101779	0	0	0	0	0	0	0.11005	0	0.0767263	0	0.0669254	0	0	0	0.0119685	0.0377617	0.0823621	0.0570404	0.0135364	0	0.110147	0	0	0	0	0	0	0.0124302	0.0114409	0.0220535	0	0	0	0	0	0	0	0	0	0	0	0.0154859	0	0.102737	0	0
Firmicutes;Bacilli;Bacillales;Staphylococcaceae;Staphylococcus;uncultured Firmicutes bacterium	0.43006	0	0.0501299	0.539913	0	0	0	0.199732	0	0	0	0	0	0.0552135	0	0	0.119402	0.133062	0.125086	0.11668	0.0558763	0	0	0.0488153	0	0.104646	0.0839144	0.0070281	0	0	0.0463308	0.0368652	0	0	0	0	0	0.0281499	0	0	0.0154165	0	0	0	0	0	0.0296795	0	0
Firmicutes;Bacilli;Bacillales;Staphylococcaceae;Staphylococcus;uncultured Staphylococcus sp.	0	0	0	0.0615691	0	0	0	0	0	0	0	0	0	0	0	0	0	0	0	0	0	0	0	0	0	0	0	0	0	0.0295065	0	0	0	0	0	0	0	0	0	0	0	0	0	0	0	0	0	0	0
Firmicutes;Bacilli;Bacillales;Staphylococcaceae;Staphylococcus;uncultured bacterium	0	0	0.110893	0.169315	0	0	0	0	0	0.0115169	0	0	0	0.0133851	0	0	0	0	0	0	0.0395791	0.0490694	0	0.0413052	0.0432813	0	0.0122057	0	0.0349103	0	0.0124302	0	0	0.0420469	0	0.0223975	0	0.0115159	0	0.039482	0	0	0	0	0	0.0113508	0	0	0.0180173
Firmicutes;Bacilli;Bacillales;Staphylococcaceae;Staphylococcus;__	0.246065	0	0.912971	0.298373	0.334571	0	0	0.586097	0.563576	0.179152	0.135799	0.131213	0.208046	0.0920225	0	0	0.262684	0.182344	0.0660829	0.160606	0.0547122	0.0169205	0	0.0300402	0.064922	0.064456	0.109852	0.00773091	0	0.0811429	0.0395507	0.39789	0.135471	0.0939873	0.23051	0.185402	0.0391901	0.0665362	0.080242	0.236892	0.585827	0.0311721	0.0183927	0.0461193	0.714931	0	0.0426167	0.0122279	0.470087
Firmicutes;Bacilli;Bacillales;Thermoactinomycetaceae;Kroppenstedtia;uncultured Kroppenstedtia sp.	0	0	0	0	0	0	0	0	0	0	0	0	0	0	0	0	0	0	0	0	0	0	0	0	0	0	0	0	0	0	0	0	0	0	0	0	0	0	0	0	0	0	0	0	0	0	0	0	0
Firmicutes;Bacilli;Bacillales;Thermoactinomycetaceae;Thermoactinomyces;Ambiguous_taxa	0	0	0	0.0805134	0	0	0	0.140794	0	0	0	0	0	0	0	0	0	0.0183048	0	0	0	0	0	0	0	0	0	0	0	0	0	0	0	0	0	0	0	0	0	0	0	0	0	0	0	0.00425656	0	0	0
Firmicutes;Bacilli;Bacillales;__;__;__	0.0399025	0.0114742	0.104817	0.0414407	0	0	0	0.268492	0	0.0358304	0.105953	0.123429	0.0300066	0.0518672	0	0	0.0973585	0	0	0.0205905	0	0.0169205	0	0.0137684	0.0185491	0.0106163	0	0.0175702	0	0	0.0361606	0.0699167	0.050408	0	0.0151833	0.0236418	0	0	0.0987593	0	0.16273	0.0692713	0.0194145	0.243986	0.34327	0.0312148	0.00989315	0	0
Firmicutes;Bacilli;Lactobacillales;Aerococcaceae;Aerococcus;uncultured bacterium	0	0	0	0.0509129	0	0	0	0	0	0	0.035815	0	0	0	0	0	0	0	0	0	0	0	0	0	0	0	0	0	0	0	0	0	0	0	0.0179439	0	0	0	0	0.0605391	0	0	0	0	0	0	0	0	0
Firmicutes;Bacilli;Lactobacillales;Aerococcaceae;Facklamia;uncultured bacterium	0	0	0	0.11485	0	0	0	0	0	0	0	0	0	0	0	0	0	0	0	0	0	0	0	0	0	0	0	0	0	0	0	0	0	0	0	0	0	0	0	0	0	0	0	0	0	0	0	0	0
Firmicutes;Bacilli;Lactobacillales;Aerococcaceae;Globicatella;Ambiguous_taxa	0.0509865	0.023831	0	0	0	0	0	0	0.152894	0.0895759	0	0	0.282062	0.157275	0	0	0	0.0485782	0	0.0109816	0	0	0	0	0.0247322	0.0424651	0.0686572	0	0	0	0	0.0444925	0.0346555	0.0544137	0.175298	0.108255	0.121303	0.0626975	0.0493797	0.0552748	0.215831	0.00692713	0	0.0133895	0	0	0.00304405	0	0.0630605
Firmicutes;Bacilli;Lactobacillales;Aerococcaceae;Globicatella;__	0	0	0	0	0	0	0	0.311057	0	0	0	0	0	0	0	0	0	0	0	0	0	0	0	0	0	0	0.0183086	0	0	0	0	0	0	0	0	0	0	0	0	0	0	0	0	0	0	0	0	0	0
Firmicutes;Bacilli;Lactobacillales;Aerococcaceae;uncultured;uncultured Aerosphaera sp.	0	0	0	0	0	0	0	0	0	0	0	0	0	0	0	0	0	0	0	0	0	0	0	0	0	0	0	0	0	0	0	0	0	0	0	0	0	0	0	0	0	0	0	0	0	0	0	0	0
Firmicutes;Bacilli;Lactobacillales;Aerococcaceae;uncultured;uncultured bacterium	0.00886721	0	0	0	0	0	0	0	0	0.0140762	0	0	0	0	0	0	0	0	0	0	0	0	0	0	0	0	0	0	0	0	0	0	0	0	0	0	0	0	0	0	0	0	0	0	0	0	0	0	0
Firmicutes;Bacilli;Lactobacillales;Carnobacteriaceae;Allofustis;Ambiguous_taxa	0	0	0	0	0	0	0	0	0	0	0	0	0	0	0	0	0	0	0	0	0	0	0	0	0	0	0	0	0	0	0	0	0	0	0.013803	0	0	0.0422249	0	0	0	0	0	0	0	0	0	0	0
Firmicutes;Bacilli;Lactobacillales;Carnobacteriaceae;Atopococcus;uncultured bacterium	0	0	0	0	0	0	0	0	0	0	0	0	0	0	0	0	0	0	0	0	0	0	0	0	0	0.0212325	0	0	0	0	0	0	0	0	0	0	0	0	0	0	0	0	0	0	0	0	0	0	0
Firmicutes;Bacilli;Lactobacillales;Carnobacteriaceae;Atopostipes;Ambiguous_taxa	0	0	0	0	0	0	0	0	0	0	0	0	0	0	0	0	0.077152	0	0	0	0	0.0169205	0	0	0	0.00454983	0	0.00983934	0	0	0	0	0	0	0	0	0	0	0.0308623	0	0	0	0	0	0	0	0	0	0
Firmicutes;Bacilli;Lactobacillales;Carnobacteriaceae;Atopostipes;uncultured bacterium	0	0	0	0	0	0	0	0	0	0	0	0	0	0	0	0	0	0	0	0	0	0	0	0	0	0	0	0	0	0	0	0	0	0	0	0	0	0	0	0	0	0	0	0	0	0	0	0	0
Firmicutes;Bacilli;Lactobacillales;Carnobacteriaceae;Carnobacterium;Ambiguous_taxa	0.254932	0.0211831	0.23242	0.719884	0.0870801	0	0	0.245572	0.128005	0.0332711	0.0134306	0.047815	0.0620136	0.204123	0	0	0	0.107717	0.0542824	0.027454	0.0360868	0.037225	0	0.0212785	0.117478	0.0136495	0.103749	0.0323293	0	0.0147533	0.0293805	0.0610182	0	0	0.013803	0	0	0	0	0	0.0102777	0	0	0.00892631	0	0	0.0235914	0	0
Firmicutes;Bacilli;Lactobacillales;Carnobacteriaceae;Carnobacterium;Carnobacterium sp. 7196	0	0	0	0	0	0	0	0	0	0	0	0	0	0	0	0	0	0	0	0	0	0	0	0	0	0	0	0	0	0	0	0	0	0	0	0	0	0	0	0	0	0	0	0	0	0	0	0	0
Firmicutes;Bacilli;Lactobacillales;Carnobacteriaceae;Carnobacterium;uncultured bacterium	1.13057	0	7.92052	0.0378887	0.792887	0.00723397	3.60695	0.93972	0	0.0524659	0.0492456	0.0689425	0.0840185	0.199103	0.453858	0.60055	0	0.0267532	0.023601	0	0	0	0	0	0.0123661	0.00303322	0	0.0133534	0.0491331	0	0.102832	0.04195	0.075612	0	0	0	0	0	0	0	0	0	0	0	0	0	0.0129372	0	0
Firmicutes;Bacilli;Lactobacillales;Carnobacteriaceae;Carnobacterium;__	0	0	0	0	0	0	0	0	0	0	0	0	0	0	0	0	0	0	0	0	0	0	0	0	0	0	0	0	0	0	0	0	0	0	0	0	0	0	0	0	0	0	0	0	0	0	0	0	0
Firmicutes;Bacilli;Lactobacillales;Carnobacteriaceae;Granulicatella;Ambiguous_taxa	0	0	0	0	0	0	0	0	0	0	0	0	0	0	0	0	0	0	0	0	0	0	0	0	0	0	0	0	0	0	0	0.0279667	0	0	0	0	0	0	0	0	0	0	0	0	0	0	0	0	0
Firmicutes;Bacilli;Lactobacillales;Carnobacteriaceae;Granulicatella;Granulicatella balaenopterae	0	0	0	0	0	0	0	0	0	0	0	0	0	0	0	0	0	0.0528024	0.068443	0.0439265	0.0244459	0.0152284	0	0	0.0247322	0.0470149	0.0152572	0.00913653	0.0155157	0.0688485	0.0271205	0.118223	0	0	0	0	0	0	0	0	0	0	0	0	0	0	0	0	0
Firmicutes;Bacilli;Lactobacillales;Carnobacteriaceae;Jeotgalibaca;Ambiguous_taxa	0.150743	0	0	0	0	0	0	0	0	0	0	0.00778383	0	0	0	0	0	0	0	0	0	0	0	0	0	0.027299	0	0	0	0	0	0	0	0	0	0	0	0	0	0	0	0	0	0	0	0	0	0	0
Firmicutes;Bacilli;Lactobacillales;Carnobacteriaceae;Jeotgalibaca;uncultured bacterium	0	0	0	0	0	0	0	0	0	0	0	0	0	0	0	0	0	0	0	0	0	0	0	0	0	0	0	0.00281124	0	0	0	0	0	0	0	0	0	0	0	0	0	0	0	0	0	0	0	0	0
Firmicutes;Bacilli;Lactobacillales;Carnobacteriaceae;Pisciglobus;Ambiguous_taxa	0	0	0	0	0	0	0	0	0	0	0	0	0	0	0	0	0	0	0	0	0	0	0	0	0	0	0	0	0	0	0	0	0	0	0	0	0	0	0	0	0	0	0	0	0	0	0	0	0
Firmicutes;Bacilli;Lactobacillales;Carnobacteriaceae;Trichococcus;Trichococcus sp. 16SWWE-7	0	0	0	0	0	0	0	0	0	0	0	0	0	0.0284433	0	0	0	0	0	0	0	0.00338409	0	0.0200268	0.00927457	0	0	0.00562248	0	0	0	0.0152546	0	0	0	0	0	0	0	0	0	0	0	0	0	0	0	0	0
Firmicutes;Bacilli;Lactobacillales;Enterococcaceae;Ambiguous_taxa;Ambiguous_taxa	0.128575	0	0	0	0	0	0	0	0.142227	0	0.0402919	0.0411431	0.0260057	0.0167314	0	0	0	0	0	0.0315722	0	0	0	0	0	0	0.0350915	0	0	0	0.0135602	0.100426	0	0	0	0	0	0	0	0	0	0	0	0	0	0	0	0	0
Firmicutes;Bacilli;Lactobacillales;Enterococcaceae;Enterococcus;Ambiguous_taxa	0	0	0.0410154	0	0	0	0	0	0	0	0	0	0	0.0401553	0	0	0	0	0	0	0	0	0	0	0	0	0	0.0126506	0	0	0	0.0190682	0.031505	0.106354	0.0262257	0	0	0.0204727	0	0	0.128471	0.00865891	0	0	0.0696864	0.00709426	0	0	0
Firmicutes;Bacilli;Lactobacillales;Enterococcaceae;Enterococcus;Enterococcus cecorum	0.0665041	0.00441314	0	0.201283	0	0	0	0.324154	0	0.0281524	0.0701377	0.120093	0.00800176	0	0	0	0	0	0	0.0466719	0	0.0186125	0	0.0700938	0.0247322	0.0599061	0.0442458	0.0386545	0.0452541	1.12125	0.0237304	0	0.0976655	0.131088	3.40934	0.138118	0.259401	0.176577	0.0339485	0.534323	0.030833	0	0	0	0	0	0	0	0.0532329
Firmicutes;Bacilli;Lactobacillales;Enterococcaceae;Enterococcus;Enterococcus faecalis	0	0.00353051	0.0562062	0.151555	0	0	0	0.232474	0	0	0	0	0	0	0	0	0.0495977	0	0	0.0205905	0	0	0	0.0350469	0	0	0	0	0.0930942	0.0122944	0	0	0	0	0	0	0	0.0115159	0	0	0	0	0	0	0.0258098	0	0	0	0
Firmicutes;Bacilli;Lactobacillales;Enterococcaceae;Enterococcus;Enterococcus faecium	0	0	0	0	0.256657	0	0	0	0	0	0.0134306	0	0	0	0	0	0.0459238	0.0133766	0	0.0343176	0.0151332	0.0101523	0	0.0137684	0.0139119	0.0136495	0.0183086	0.0070281	0	0.0122944	0.0146903	0	0	0	0	0	0.0186619	0	0.00925869	0	0	0	0	0	0	0	0	0	0.0171983
Firmicutes;Bacilli;Lactobacillales;Enterococcaceae;Enterococcus;Enterococcus gallinarum	0	0	0.130642	0	0	0	0	0.219377	0	0	0	0	0	0	0	0	0.0679672	0	0	0.0576535	0.00814863	0	0	0.0125167	0	0	0	0	0	0	0.0113002	0	0	0	0	0	0	0.0511817	0	0	0.0428236	0	0	0.047607	0	0.00638484	0.00608809	0	0.0024569
Firmicutes;Bacilli;Lactobacillales;Enterococcaceae;Enterococcus;Enterococcus mundtii	0	0	0	0.10301	0	0	0	0.0196457	0	0	0	0	0	0	0	0	0	0	0	0	0	0	0	0	0	0	0	0	0	0	0	0	0	0	0	0	0	0	0	0	0	0	0	0	0	0	0	0	0
Firmicutes;Bacilli;Lactobacillales;Enterococcaceae;Enterococcus;uncultured anaerobic bacterium	0	0	0	0	0	0	0	0	0	0	0	0	0	0	0	0	0	0	0	0	0	0	0	0	0	0	0	0	0	0	0	0	0	0	0	0	0	0	0	0	0	0	0	0	0	0	0	0	0
Firmicutes;Bacilli;Lactobacillales;Enterococcaceae;Enterococcus;uncultured bacterium	0	0	0	0	0	0	0	0	0	0	0.035815	0	0.018004	0.120466	0	0	0	0	0	0	0	0	0	0	0	0	0	0	0	0	0.00678012	0	0	0	0	0	0	0	0	0	0	0	0	0	0	0	0	0	0
Firmicutes;Bacilli;Lactobacillales;Enterococcaceae;Enterococcus;__	0	0	0	0	0	0	0	0	0	0	0	0.0211275	0.0520114	0	0	0	0	0	0	0.0219632	0.0186254	0.0118443	0	0	0.0216407	0	0	0	0.0736996	0.666355	0.0372907	0	0.069311	0	0.357498	0.211532	0.110105	0	0.268502	0	0	0	0	0	0	0	0	0	0
Firmicutes;Bacilli;Lactobacillales;Enterococcaceae;Tetragenococcus;bacterium Te18A	0	0	0	0	0	0	0	0	0	0	0	0	0	0	0	0	0	0	0	0	0	0	0	0	0	0	0	0	0	0	0	0	0	0	0	0	0	0	0	0	0	0	0	0	0	0	0	0	0
Firmicutes;Bacilli;Lactobacillales;Enterococcaceae;Vagococcus;Ambiguous_taxa	0.895589	0.0185352	1.10741	0.454664	0.582062	0	0	0.615566	1.45961	0.275126	0.819268	0.375848	0.496109	0.707737	0	0	0.169	0.152071	0	0.0178451	0.0151332	0.0253807	0	0.0375502	0.0355525	0.114504	0.0183086	0	0.0284455	0.039342	0.0463308	0.12585	0	0	0.0069015	0	0	0.0626975	0	0	0.0548142	0	0	0.0193403	0	0	0.0213083	0.00679329	0.0475001
Firmicutes;Bacilli;Lactobacillales;Enterococcaceae;Vagococcus;uncultured bacterium	0.605187	0.0485445	0.394963	0.222596	0.398735	0	0	0.386366	0.385791	0.207304	0.57304	0.38252	1.03223	0.617387	0.0118398	0	0.12675	0.00985645	0.0283213	0	0	0.0406091	0	0.0438086	0.0185491	0.0113746	0.0396686	0.0175702	0	0	0.0271205	0.0546622	0.0787625	0	0	0	0	0	0.0246898	0	0	0	0	0	0	0	0	0	0
Firmicutes;Bacilli;Lactobacillales;Enterococcaceae;Vagococcus;__	0.747063	0.0158873	0.443574	1.08101	0.815803	0	0	1.31299	0.0408903	0	0.0552148	0	0	0.145563	0	0	0.0642933	0.106309	0	0.0837348	0	0	0	0	0.0896542	0.0477732	0.0457715	0	0.0168087	0	0.0361606	0	0	0	0	0	0	0	0	0	0	0	0	0	0	0	0.00456607	0	0
Firmicutes;Bacilli;Lactobacillales;Enterococcaceae;__;__	0	0	0	0	0	0	0	0	0.117338	0.0588642	0.152214	0.343601	0.18004	0.289453	0	0	0.0844998	0	0.0259612	0.0425538	0	0	0	0.050067	0.0463729	0.0788638	0.0595029	0	0	0.115567	0.0429408	0.0508485	0	0	0	0	0	0	0	0	0	0	0	0	0	0	0	0	0.0171983
Firmicutes;Bacilli;Lactobacillales;Lactobacillaceae;Lactobacillus;Ambiguous_taxa	0.0908889	0.00970891	0.086588	0.110114	0.875384	0	0.00208093	0.121149	0.549353	0.0882963	0.241751	0.0733904	0.196043	0.150582	0	0	0.857857	0.996909	0.486182	0.790677	0.570404	0.79357	0	0.48565	0.553383	1.21253	0.840669	0.260742	0.301263	1.02289	1.19895	1.56105	5.41886	7.30627	5.70202	6.72175	2.73211	6.0164	5.03673	5.7091	5.3461	0.562829	0.348439	4.08676	3.26494	0.720777	0.00152202	0.360045	0.371811
Firmicutes;Bacilli;Lactobacillales;Lactobacillaceae;Lactobacillus;Heliconius cydno chioneus	0	0	0	0	0	0	0	0	0	0.0140762	0	0	0	0	0	0	0	0.0281613	0	0.0233359	0	0	0	0.00375502	0	0	0	0.00632529	0	0	0.0226004	0	0	0.0123667	0	0.0360849	0	0.0422249	0.0123449	0	0	0	0	0	0	0	0	0	0.0270259
Firmicutes;Bacilli;Lactobacillales;Lactobacillaceae;Lactobacillus;Lactobacillus brevis	0	0	0	0	0	0	0	0	0	0	0.0223844	0	0.032007	0.0351359	0	0	0	0	0	0	0.0803222	0.0473773	0	0.0738488	0	0.0136495	0	0.0126506	0	0	0	0	0	0.0618337	0	0.0584824	0.0130634	0.0115159	0.0277761	0	0	0	0	0	0.0335527	0	0	0	0.0171983
Firmicutes;Bacilli;Lactobacillales;Lactobacillaceae;Lactobacillus;Lactobacillus buchneri	0	0	0	0.0307845	0.0320821	0	0	0	0	0	0	0	0.122027	0	0	0	0	0	0.0731632	0.0398084	0.064025	0.162437	0	0.0450603	0	0	0.0549258	0	0	0	0.054241	0.00508485	0.103966	0	0	0.0248861	0	0	0	0	0	0	0	0	0	0	0	0	0.0327587
Firmicutes;Bacilli;Lactobacillales;Lactobacillaceae;Lactobacillus;Lactobacillus casei	0	0	0	0	0	0	0	0	0	0	0	0	0	0	0	0	0	0	0	0	0	0	0	0	0	0	0	0	0	0	0	0	0	0	0	0	0	0.00255908	0	0	0	0	0	0	0	0.00354713	0	0	0
Firmicutes;Bacilli;Lactobacillales;Lactobacillaceae;Lactobacillus;Lactobacillus crispatus	0	0	0	0	0	0	0	0	0	0.0754997	0	0	0	0	0	0	0.146956	0.0837798	0.212409	0.337685	0.352719	0.252115	0	0.136432	0.1824	0.288914	0.317349	0.0456826	0.0711136	0.191792	0.363866	0.134749	0.592294	1.32324	0.654262	1.53796	0.225809	0.922549	1.28696	1.37134	1.06545	0.0917844	0.0807234	1.46094	0.562653	0.175938	0	0.055705	0.0868105
Firmicutes;Bacilli;Lactobacillales;Lactobacillaceae;Lactobacillus;Lactobacillus crustorum	0	0	0	0	0	0	0	0	0	0	0	0	0	0	0	0	0	0	0.068443	0.0247086	0	0.0287648	0	0	0	0	0	0	0	0	0	0	0	0	0	0	0	0	0	0	0	0	0	0	0	0	0	0	0.026207
Firmicutes;Bacilli;Lactobacillales;Lactobacillaceae;Lactobacillus;Lactobacillus delbrueckii	0	0	0	0.129058	0	0	0	0	0	0.0767794	0.0492456	0.0422551	0	0	0	0	0.944193	0.60758	5.22763	2.49969	3.65524	3.67513	0	4.53607	0.355525	0.629393	0.222755	0.0878512	0.134469	0.346701	0.337876	0.437297	1.14363	1.32324	2.60739	1.32021	1.12718	1.95386	1.54311	1.94515	0.157591	0.0900526	0	0.15621	0.611692	0.126987	0	0	2.1113
Firmicutes;Bacilli;Lactobacillales;Lactobacillaceae;Lactobacillus;Lactobacillus delbrueckii subsp. lactis	0	0	0	0	0	0	0	0	0	0	0	0	0	0	0	0	0.0808259	0	0	0	0.0547122	0.0744501	0	0.061332	0.0541017	0.0659726	0	0	0.0349103	0	0.0847515	0	0.560789	0.259702	0.585247	0.42182	0.399365	0.681996	0.814765	0.550116	0	0	0.0204363	0	0	0.0461127	0	0	0.0294828
Firmicutes;Bacilli;Lactobacillales;Lactobacillaceae;Lactobacillus;Lactobacillus faeni	0	0	0	0	0	0	0	0	0	0	0	0	0	0	0	0	0	0.0528024	0	0	0	0	0	0	0	0	0.0152572	0	0	0	0	0	0	0	0	0	0	0	0	0	0	0	0	0	0	0	0	0	0
Firmicutes;Bacilli;Lactobacillales;Lactobacillaceae;Lactobacillus;Lactobacillus fermentum	0.758147	0.133277	0.991964	1.93943	0.71039	0	0	1.72555	2.37342	0.978937	1.48334	0.678305	2.10446	1.56606	0	0	2.40273	2.07197	7.229	3.41391	5.83908	6.26396	0	7.95689	1.76217	1.74941	1.17328	0.201706	0.76932	1.42369	1.46677	1.62334	2.52985	1.18721	2.08563	1.7271	2.14239	2.57444	2.16036	2.42946	2.91372	0.294403	0.25341	1.95635	4.09085	0.659766	0	0.235048	10.3141
Firmicutes;Bacilli;Lactobacillales;Lactobacillaceae;Lactobacillus;Lactobacillus gasseri	0	0	0	0	0	0	0	0	0	0	0	0	0	0	0	0	0	0	0	0	0	0	0	0	0	0	0	0	0	0	0.0621511	0	0	0	0.169777	0	0	0.0908474	0	0	0	0	0	0	0	0	0	0	0
Firmicutes;Bacilli;Lactobacillales;Lactobacillaceae;Lactobacillus;Lactobacillus ginsenosidimutans	0	0	0	0	0	0	0	0	0	0	0	0.0322473	0.0400088	0	0	0	0	0	0	0	0	0	0	0	0	0	0	0.011245	0	0	0	0	0	0.0667804	0.0055212	0.0634597	0	0.0972451	0	0	0	0	0	0	0	0	0	0	0
Firmicutes;Bacilli;Lactobacillales;Lactobacillaceae;Lactobacillus;Lactobacillus helveticus	0	0	0	0	0	0	0	0	0.0586688	0.0601438	0	0	0	0.113773	0	0	1.10401	0.93073	4.99162	2.1977	3.29321	3.59391	0	5.03048	0.248868	0.2328	0.186137	0.0224899	0.0478401	0.248346	0.298325	0.410602	0.986106	0.746952	0.989675	0.594779	0.694224	0.91999	0.910438	0.794904	0	0	0	0	0	0	0	0	3.10634
Firmicutes;Bacilli;Lactobacillales;Lactobacillaceae;Lactobacillus;Lactobacillus insicii	0	0	0	0	0	0	0	0	0	0	0	0	0	0	0	0	0	0	0	0	0	0	0	0	0	0	0	0	0	0	0	0	0	0	0	0	0	0	0	0	0	0	0	0	0	0	0	0	0
Firmicutes;Bacilli;Lactobacillales;Lactobacillaceae;Lactobacillus;Lactobacillus johnsonii	0	0	0	0	0	0	0	0	0	0	0	0	0	0	0	0	0	0	0	0	0	0	0	0	0	0	0	0	0	0	0	0	0	0	0	0	0	0	0	0.178985	0	0	0	0	0	0	0	0	0
Firmicutes;Bacilli;Lactobacillales;Lactobacillaceae;Lactobacillus;Lactobacillus manihotivorans	0	0	0	0	0	0	0	0	0.176006	0	0.177583	0.0155677	0.132029	0.292799	0	0	0.159815	0.156295	0.384697	0.179824	0.124558	0.296108	0	0.241573	0.00618305	0.00303322	0.01068	0.00843372	0	0	0.00339006	0	0.031505	0	0.133889	0.0597268	0.048521	0.0499021	0.0586384	0.0894925	0	0	0	0	0	0	0	0	0.932804
Firmicutes;Bacilli;Lactobacillales;Lactobacillaceae;Lactobacillus;Lactobacillus mucosae	0	0	0	0	0	0	0	0	0.328901	0.0486269	0	0	0	0	0	0	0	0.0183048	0	0	0.0570404	0.0913706	0	0.0675904	0.0494644	0.12512	0.303617	0.0344377	0.0439612	0.0319654	0.132212	0.102968	0.286695	0.183028	0.325751	0.391957	0	0.39026	0.475279	0.102653	0.710872	0	0	0	0.438766	0.0120602	0	0	0
Firmicutes;Bacilli;Lactobacillales;Lactobacillaceae;Lactobacillus;Lactobacillus nantensis	0	0	0	0	0	0	0	0	0	0	0	0	0	0	0	0	0	0	0	0	0	0	0	0	0	0	0	0	0	0	0	0	0	0	0	0	0	0	0	0	0	0	0	0	0	0	0	0	0
Firmicutes;Bacilli;Lactobacillales;Lactobacillaceae;Lactobacillus;Lactobacillus paracasei	0	0	0	0	0	0	0	0	0	0.0204745	0	0	0.050011	0.0317896	0	0	0	0	0.0424819	0.0315722	0.0791581	0.165821	0	0.155208	0.0231864	0.0166827	0	0	0	0	0	0	0	0	0	0	0	0	0	0.144767	0	0	0	0	0	0	0	0	0.0221121
Firmicutes;Bacilli;Lactobacillales;Lactobacillaceae;Lactobacillus;Lactobacillus reuteri	0	0.0370704	0.0273436	0.143266	0.123745	0	0	0	0.0462239	0.0268728	0.0641686	0.0100078	0	0.0217508	0	0	1.04339	0.860327	0.285573	0.459855	0.321289	0.213198	0	0.222798	0.248868	0.794704	0.198343	0.0836344	0.0581839	0.255723	0.55936	0.296193	1.15938	1.48896	1.36236	1.27541	0.599048	1.86173	1.61718	1.44767	2.44266	0.277085	0.194145	2.23753	1.33178	0.449776	0.0799062	0.0991821	0.0425863
Firmicutes;Bacilli;Lactobacillales;Lactobacillaceae;Lactobacillus;Lactobacillus rhamnosus	0.022168	0	0	0	0	0	0	0	0	0.00767794	0.00895375	0.201268	0.00800176	0	0	0	0.0551086	0	0	0.0150997	0	0.00169205	0	0	0	0.0212325	0.0564515	0.0126506	0	0.0122944	0.0180803	0.00762728	0.069311	0.180555	0.110424	0.111988	0	0.158663	0.0462934	0.0947568	0.0685178	0.00865891	0.00510908	0.0193403	0	0.0276676	0	0	0.0204742
Firmicutes;Bacilli;Lactobacillales;Lactobacillaceae;Lactobacillus;Lactobacillus sakei	0.458878	0.0229483	0.885628	0.905776	0.206242	0	0	0.782555	1.71206	0.197067	1.13265	0.882909	1.67837	1.45228	0	0	0.0698042	0	0	0	0.00931272	0	0	0	0	0	0	0	0	0	0	0.0165258	0	0	0	0.00871015	0	0	0	0	0	0	0	0	0	0	0	0	0.0327587
Firmicutes;Bacilli;Lactobacillales;Lactobacillaceae;Lactobacillus;Lactobacillus salivarius	0.0155176	0.0714929	0.352428	0.442824	0.0779137	0	0	0.406012	1.32627	0.206025	0.307412	0.266874	0.0800176	0.102061	0	0	6.13542	4.64098	2.3365	4.44069	2.788	1.82234	0	1.9063	8.82167	9.68963	9.24889	1.69377	2.16444	8.36018	9.53059	7.37431	22.3181	22.1439	19.3449	22.624	9.69674	24.8589	20.9956	18.8276	19.0154	2.19763	1.4193	22.8261	14.6961	4.49492	0.0114152	1.23094	0.362803
Firmicutes;Bacilli;Lactobacillales;Lactobacillaceae;Lactobacillus;Lactobacillus sharpeae JCM 1186 = DSM 20505	0	0	0	0	0	0	0	0	0	0	0	0	0	0	0	0	0	0	0	0	0	0	0	0	0	0	0	0	0	0	0	0	0.0850635	0.0766738	0.0248454	0.0846129	0.0298591	0.122836	0.0462934	0.0579069	0	0	0	0.00595088	0	0	0	0	0
Firmicutes;Bacilli;Lactobacillales;Lactobacillaceae;Lactobacillus;Lactobacillus siliginis	0	0	0	0	0	0	0	0	0	0	0	0	0	0	0	0	0.0734781	0.00915242	0.089684	0.0700078	0.02561	0.0812183	0	0.0851138	0	0	0.0137314	0	0	0	0	0	0.0472575	0	0	0	0	0.0486226	0	0.0500105	0	0	0	0	0	0	0	0	0.00327587
Firmicutes;Bacilli;Lactobacillales;Lactobacillaceae;Lactobacillus;Lactobacillus sp.	1.24806	0.0750234	0.358505	0.654763	0.921215	0	0	1.59785	0.0142227	0	0.0537225	0	0	0	0	0	0.038576	0.197833	0.528663	0.196296	0.0675172	0.338409	0	0.260348	0.0494644	0.00303322	0.0534001	0.00983934	0	0	0.0203404	0.0546622	0	0.0222601	0.0345075	0.00871015	0	0	0	0	0	0	0	0	0	0	0	0	0.0188362
Firmicutes;Bacilli;Lactobacillales;Lactobacillaceae;Lactobacillus;Lactobacillus sp. 123B	0.206163	0	0	0.00473608	0	0	0	0	0	0	0	0	0	0	0	0	0	0	0	0	0	0	0	0	0	0	0	0	0	0	0	0	0	0	0.0634938	0	0	0	0	0	0	0	0	0	0	0	0	0	0
Firmicutes;Bacilli;Lactobacillales;Lactobacillaceae;Lactobacillus;Lactobacillus sp. DJF_WC57	0.0332521	0.00529577	0	0.0816974	0	0	0	0	1.50761	0.580964	1.35948	0.818414	0.902198	1.19295	0	0	0.738455	0.849063	0.346935	0.509273	0.31314	0.370558	0	0.270362	0.924366	0.928924	1.28923	0.222791	0.23015	0.799134	1.069	0.511028	1.28225	1.53348	1.40653	2.17007	0.25007	1.46635	1.26844	1.54769	2.71159	0.270158	0.109334	2.50978	1.2621	0.581729	0	0.0951061	0.470087
Firmicutes;Bacilli;Lactobacillales;Lactobacillaceae;Lactobacillus;Lactobacillus sp. HM20	0	0	0	0	0	0	0	0.0294686	0	0.0793387	0	0	0	0	0	0	0.229619	0.291469	0.514503	0.247086	0.324781	0.35533	0	0.603307	0	0.0697641	0.0762858	0	0	0	0.0293805	0	0	0	0.041409	0.0684369	0	0	0	0.165824	0.126758	0	0	0	0	0	0.00456607	0	0.0155604
Firmicutes;Bacilli;Lactobacillales;Lactobacillaceae;Lactobacillus;Lactobacillus sp. LA-6	0	0	0	0	0.270407	0	0	0	0	0	0	0	0	0	0	0	0.0991954	0.0788516	0.420099	0.0535354	0.23049	0.340102	0	0.310415	0	0.0515648	0.0671315	0.00140562	0.0142227	0.019671	0.0135602	0.00762728	0.176428	0	0.0731559	0.032352	0.0541196	0.00767725	0.101846	0.0131607	0	0	0	0	0	0	0	0	1.9172
Firmicutes;Bacilli;Lactobacillales;Lactobacillaceae;Lactobacillus;Lactobacillus sp. LB12	0	0	0	0.202467	0	0	0	0	0	0	0	0	0.0660145	0	0	0	0	0.0795556	0.106205	0	0.188583	0.0913706	0	0.29164	0	0	0	0	0	0	0	0	0	0.0420469	0.106283	0.0136874	0	0	0	0.279006	0	0	0	0	0	0	0	0	2.61496
Firmicutes;Bacilli;Lactobacillales;Lactobacillaceae;Lactobacillus;Lactobacillus sp. oral clone HT070	0	0	0	0	0	0	0	0	0	0.161237	0	0	0	0	0	0	0.159815	0.0957484	0	0	0	0.0676819	0	0.0675904	0.199403	0.242658	0.167829	0.0154618	0.0685277	0.209004	0.275725	0.0584758	0.516682	0.0766738	0.394766	0.434263	0.19595	0.0422249	0.262329	0.526427	0.0496754	0.0225132	0.0224799	0.181502	0.0619435	0	0	0	0.0941812
Firmicutes;Bacilli;Lactobacillales;Lactobacillaceae;Lactobacillus;Lactobacillus thailandensis	0	0	0	0.0355206	0.247491	0	0	0.153891	0	0.0998132	0	0	0	0	0	0	0	0.042946	0.0141606	0.0439265	0.064025	0.0304569	0	0.0425569	0.0293695	0.00682475	0.0442458	0	0.00775785	0	0.00452008	0.00508485	0	0	0	0	0	0	0	0	0	0	0	0	0	0	0	0	0.0515949
Firmicutes;Bacilli;Lactobacillales;Lactobacillaceae;Lactobacillus;Lactobacillus vaccinostercus	0	0	0	0	0	0	0	0	0	0.00639828	0	0.0344713	0	0	0	0	0	0	0.0731632	0.0535354	0.0500559	0.0321489	0	0.115154	0	0	0	0	0	0.0368831	0	0	0	0.0519403	0.013803	0.0385735	0.00933097	0.0179136	0	0	0	0	0	0	0	0	0	0.0149452	0.376725
Firmicutes;Bacilli;Lactobacillales;Lactobacillaceae;Lactobacillus;Lactobacillus vermiforme	0	0	0	0	0	0	0	0	0.0426682	0	0	0	0.0380084	0	0	0	0	0	0	0	0	0	0	0	0	0	0	0	0	0	0	0	0	0	0	0	0	0	0	0	0	0	0	0	0	0	0	0	0
Firmicutes;Bacilli;Lactobacillales;Lactobacillaceae;Lactobacillus;bacterium Te52A	7.81202	0.289502	4.26408	7.42381	6.31101	0	0	7.42281	0.704025	0.477312	0.614824	0.484822	1.08424	1.24816	0	0	0.668651	0.622364	0.516863	0.610853	0.431877	0.357022	0	0.615824	0.295241	0.373845	0.295989	0.0723894	0.122833	0.2631	0.271205	0.559334	0.135471	0.113774	0.0924801	0.10701	0.0298591	0.22392	0.0895006	0.131607	0	0	0	0	0	0	0.0547929	0	0.861554
Firmicutes;Bacilli;Lactobacillales;Lactobacillaceae;Lactobacillus;uncultured Lactobacillaceae bacterium	0	0	0	0	0	0	0	0	0	0	0	0	0	0	0	0	0.231456	0.147143	1.18949	0.455737	0.928944	1.08799	0	1.13527	0	0.0379153	0	0	0	0	0	0	0	0	0	0	0	0	0	0	0	0	0	0	0	0	0	0	0.185087
Firmicutes;Bacilli;Lactobacillales;Lactobacillaceae;Lactobacillus;uncultured Lactobacillus sp.	0	0	0	0	0	0	0	0	0	0	0.00746146	0	0.286063	0.0284433	0	0	0.139608	0.321743	0.115645	0.372002	0.186254	0.235195	0	0.272865	0.238047	0.175169	0.576721	0.0969878	0.20429	0.344243	0.447488	0.425856	0.541886	0.603497	0.314708	0.541274	1.06933	0.364669	0.77773	0.544852	0.125045	0.0329039	0.0418944	0.233572	0.58072	0.0411467	0.0159812	0.00679329	0.833709
Firmicutes;Bacilli;Lactobacillales;Lactobacillaceae;Lactobacillus;uncultured bacterium	0	0	0	0	0	0	0	0	0	0	0	0	0	0	0	0	0.198391	0.0542105	0.0778835	0.107071	0	0	0	0	0	0.00909966	0	0.0175702	0	0	0.0531109	0.0915274	0.176428	0	0.117326	0.0273748	0.0466548	0.078052	0.277761	0.0947568	0.0565272	0	0.0245236	0.22167	0.110982	0.00425656	0	0.0339665	0.0868105
Firmicutes;Bacilli;Lactobacillales;Lactobacillaceae;Lactobacillus;uncultured rumen bacterium 3C3d-12	0	0	0.0425344	0	0.0595811	0	0	0	0	0.117728	0.134306	0.0189036	0	0.160621	0	0	0.19288	0.144327	0.313894	0.234732	0.152496	0.255499	0	0.21654	0.366346	0.328346	0.204446	0.0470883	0.0439612	0.331948	0.456528	0.362296	0.532434	0.405629	0.890294	0.711744	0.38257	0.58475	0.49071	0.584334	0.371709	0.0658077	0.0449599	0.519214	0.221964	0.0695238	0.0197863	0	0.425044
Firmicutes;Bacilli;Lactobacillales;Lactobacillaceae;Lactobacillus;__	0.281534	0.0467793	1.52668	0.79803	0.417068	0	0	0.805475	0.769805	0.671819	0.655116	0.580451	1.13025	0.675947	0	0.00385957	7.24494	6.05468	21.484	11.8574	13.6629	17.3723	0	18.1117	3.01733	3.35702	3.03923	0.546786	0.941286	2.33593	3.58329	3.09159	12.0192	14.0437	12.9251	13.4435	4.83531	12.3041	11.5271	12.8948	7.98061	0.883209	0.498646	11.5268	4.86772	1.23369	0.0235914	0.389935	34.1927
Firmicutes;Bacilli;Lactobacillales;Lactobacillaceae;Pediococcus;Pediococcus acidilactici	0	0	0	0.0142082	0.0366653	0	0	0	0	0	0	0	0.0240053	0	0	0	0	0.00915242	0.0495622	0.0150997	0.0104768	0.0287648	0	0	0.0231864	0	0	0	0	0	0	0	0	0	0	0	0	0	0	0	0	0	0	0	0	0	0	0	0
Firmicutes;Bacilli;Lactobacillales;Lactobacillaceae;Pediococcus;Pediococcus argentinicus	0	0	0	0	0	0	0	0	0	0	0	0	0	0	0	0	0.170837	0.124614	0.835477	0.382984	0.330602	0.541455	0	0.34421	0	0.0288156	0.0137314	0.00491967	0	0	0.0531109	0.0228818	0.195331	0.108827	0.296765	0.319787	0.0690492	0.601384	0.111104	0.521162	0	0	0	0	0	0	0.00532708	0	0.818967
Firmicutes;Bacilli;Lactobacillales;Lactobacillaceae;Pediococcus;Pediococcus pentosaceus	0.0332521	0	0	0	0	0	0	0	0	0	0	0	0	0	0	0	0	0	0	0	0	0	0	0	0	0	0	0	0	0	0	0	0	0	0	0	0	0	0	0	0	0	0	0	0	0	0	0	0
Firmicutes;Bacilli;Lactobacillales;Lactobacillaceae;Pediococcus;uncultured bacterium	0	0	0	0	0	0	0	0	0	0	0.0164152	0	0	0	0	0	0.157978	0.115461	0.151047	0.201787	0.115245	0.236887	0	0.142691	0	0.0250241	0	0	0	0	0	0	0	0	0.0372681	0	0	0	0.0185174	0	0	0.00519534	0	0	0.0774293	0	0	0	0.0049138
Firmicutes;Bacilli;Lactobacillales;Lactobacillaceae;__;__	0	0	0	0	0	0	0	0	0	0	0	0	0	0.0167314	0	0	0	0	0	0	0	0	0	0	0	0	0	0	0	0	0	0	0	0	0	0	0	0	0	0	0	0	0	0	0	0	0	0	0
Firmicutes;Bacilli;Lactobacillales;Leuconostocaceae;Leuconostoc;Ambiguous_taxa	1.78231	0.0317746	1.97633	0.766061	3.35946	0	0	1.05759	0.382236	0.220101	0.535733	0.406983	0.368081	0.429996	0	0	0.23513	0.334415	0.67735	0.385729	0.437698	0.397631	0	0.869914	0.238047	0.365503	0.569092	0.0449798	0.155157	0.317195	0.263295	0.35594	0.321351	0.316589	0.59629	0.175447	0.418027	0.203447	0.222209	0.279006	1.57762	0.178374	0.0367854	0.23506	1.12531	0.0666861	0.0220693	0.0366838	0.401294
Firmicutes;Bacilli;Lactobacillales;Leuconostocaceae;Leuconostoc;Leuconostoc citreum	0	0	0	0	0	0	0	0	0	0	0	0	0	0	0	0	0.220434	0.0964524	0.656109	0.502409	0.802058	0.751269	0	0.932497	0.0881085	0	0	0	0	0	0	0.0546622	0.44422	0.294329	0.434795	0.230197	0.350844	0.349315	0.645022	0.442198	0	0	0	0	0	0	0	0	1.28332
Firmicutes;Bacilli;Lactobacillales;Leuconostocaceae;Leuconostoc;Leuconostoc pseudomesenteroides	0	0	0	0	0	0	0	0	0	0	0	0	0	0	0	0	0	0.199241	0.488542	0.334939	0.472621	0.499154	0	0.864907	0	0.00909966	0	0	0.0400822	0	0	0	0.103966	0.212708	0.338174	0.0771471	0.259401	0.0870088	0	0.11055	0	0	0	0	0.536843	0	0	0	0.170345
Firmicutes;Bacilli;Lactobacillales;Leuconostocaceae;Leuconostoc;uncultured bacterium	0	0	0	0	0	0	0	0	0	0	0	0	0	0	0	0	0.141445	0.0584347	0	0	0	0	0	0	0	0	0.0411943	0.0906625	0	0.0368831	0	0	0	0	0	0	0	0	0	0	0	0	0	0	0	0	0	0	0
Firmicutes;Bacilli;Lactobacillales;Leuconostocaceae;Leuconostoc;__	0.587453	0.0150047	0.331161	0.224964	0.834135	0	0	0.592646	0	0.246974	0.0462611	0.283554	0.68015	0.127158	0	0	1.27668	1.21375	5.59581	2.63971	4.3991	4.40778	0	6.61009	0.403444	0.166827	0.154097	0.0358433	0	0.331948	0.126562	0.350855	2.34712	1.44938	1.87859	1.46331	1.827	1.81055	1.07401	2.29522	1.09628	0	0.0357636	0.177039	1.32404	0.102867	0.0799062	0.0149452	6.43626
Firmicutes;Bacilli;Lactobacillales;Leuconostocaceae;Oenococcus;Ambiguous_taxa	0	0	0	0	0	0	0	0	0	0	0	0	0	0	0	0	0	0	0	0	0	0.0642978	0	0	0.0170034	0	0	0	0	0	0	0	0	0	0	0	0	0	0	0	0	0	0	0	0	0	0	0	0
Firmicutes;Bacilli;Lactobacillales;Leuconostocaceae;Weissella;Ambiguous_taxa	0	0	0	0.0130242	0	0	0	0	0	0	0.0596917	0	0	0	0	0	0.112054	0.0140806	0.0472021	0.0150997	0.00931272	0.0118443	0	0.0300402	0.0494644	0	0	0.011245	0	0	0.0248604	0.0190682	0	0	0.096621	0	0	0.0959656	0	0	0	0	0	0	0	0	0.0136982	0	0.180992
Firmicutes;Bacilli;Lactobacillales;Leuconostocaceae;Weissella;Weissella ceti	0	0	0	0	0	0	0	0	0	0	0	0	0	0	0	0	0	0	0	0	0	0	0	0	0	0	0	0	0	0	0	0	0	0	0	0	0	0	0	0	0	0	0	0	0	0	0	0	0
Firmicutes;Bacilli;Lactobacillales;Leuconostocaceae;Weissella;Weissella cibaria	0	0	0	0	0	0	0	0	0	0	0	0	0.0140031	0	0	0	0	0	0	0	0	0	0	0.00876172	0	0	0	0	0	0	0	0	0	0.126141	0.082818	0.0124431	0	0.0319885	0	0	0	0	0	0	0.149697	0	0	0	0
Firmicutes;Bacilli;Lactobacillales;Leuconostocaceae;Weissella;Weissella paramesenteroides	0	0	0	0	0	0	0	0	0	0	0	0	0	0	0	0	0	0	0.0401218	0	0	0	0	0	0	0	0	0	0	0	0	0.0584758	0.0346555	0	0	0	0	0	0	0.163192	0	0	0	0	0	0	0	0	0
Firmicutes;Bacilli;Lactobacillales;Leuconostocaceae;Weissella;uncultured Lactobacillus sp.	0	0	0.0258245	0.0189443	0	0	0	0	0	0	0	0	0	0	0	0	0.0698042	0.0140806	0.469661	0.242968	0.224669	0.483926	0	0.536968	0	0	0.0167829	0.0105421	0	0	0	0.0127121	0.0661605	0.0148401	0	0.032352	0.0615844	0.0127954	0.0462934	0.0500105	0	0	0	0	0	0	0.0106542	0	0.80914
Firmicutes;Bacilli;Lactobacillales;Leuconostocaceae;Weissella;uncultured bacterium	4.91022	0.143868	2.89842	4.50046	6.45767	0	0	5.28797	2.7361	1.28349	2.51302	1.62793	2.68659	1.76516	0	0	1.0985	1.31091	1.27682	1.15032	1.01276	1.13198	0	0.86741	1.00011	1.47187	1.37467	0.223494	0.224978	0.855689	1.22833	0.865696	0.954601	1.66951	1.34993	0.767738	0.664365	1.98841	1.41349	1.58981	0.657771	0.152397	0.0510908	0.666498	0.320041	0.33343	0.106542	0.0679329	0.75345
Firmicutes;Bacilli;Lactobacillales;Leuconostocaceae;Weissella;unidentified	0	0	0	0.0296005	0	0	0	0	0	0.0153559	0.00746146	0	0.152033	0.0284433	0	0	0	0	0	0	0	0	0	0	0	0	0	0	0	0	0	0	0	0	0	0	0	0	0	0	0	0	0	0	0	0	0	0	0
Firmicutes;Bacilli;Lactobacillales;Leuconostocaceae;Weissella;__	0	0	0	0	0	0	0	0	0.10667	0.0473473	0.456641	0.0400311	0.108024	0.254317	0	0	0.115728	0.0492822	0.0165207	0.064517	0.0162973	0.0490694	0	0.0175234	0.0170034	0.0409485	0.01068	0.0210843	0.00646488	0.0172121	0.0452008	0.059747	0	0	0	0	0	0	0	0	0	0	0	0	0	0	0	0	0
Firmicutes;Bacilli;Lactobacillales;Streptococcaceae;Lactococcus;Ambiguous_taxa	0.425626	0.0123568	0.253688	0.179971	0.769971	0	0	0.703972	0.140449	0.212423	0.0850607	0.435895	0.0800176	0.311203	0	0	0	0	0.0377617	0.127661	0	0.071066	0	0.00625837	0	0.0136495	0	0.00562248	0	0	0	0	0.0598595	0.0890406	0	0.0510166	0.285528	0.00895679	0.0740695	0.128975	0.0822213	0	0	0.22167	0.0464576	0.00638484	0.340933	0	0.571639
Firmicutes;Bacilli;Lactobacillales;Streptococcaceae;Lactococcus;Lactococcus garvieae subsp. garvieae	0	0	0	0	0	0	0	0	0	0	0.0283536	0	0	0	0	0	0	0	0	0	0	0	0	0	0	0	0	0	0	0	0	0	0	0	0	0	0	0	0.0123449	0	0.0102777	0	0	0	0	0	0	0	0
Firmicutes;Bacilli;Lactobacillales;Streptococcaceae;Lactococcus;Lactococcus hircilactis	0	0	0	0	0.444567	0	0	0.307783	0	0	0.126845	0	0	0	0	0	0	0.0901161	0.200609	0.0672624	0.147839	0.142132	0	0.25409	0	0	0.0122057	0	0	0	0	0	0.069311	0.0791472	0.0952407	0.0659483	0	0	0.0895006	0.0526427	0	0	0	0.0327298	0	0.00851311	0	0	1.03354
Firmicutes;Bacilli;Lactobacillales;Streptococcaceae;Lactococcus;Lactococcus lactis	0.152959	0.00441314	0	0.0414407	0	0	0	0.150617	0	0.107491	0.0343227	0.0845102	0	0	0	0	0.64477	0.973676	3.95082	1.84491	2.79498	2.22843	0	3.73625	0.185491	0.152419	0.238012	0.0393574	0.0219806	0.169662	0.164983	0.255514	2.07933	1.06601	1.7447	0.824976	0.714752	1.34096	1.07092	1.66614	1.34295	0.136811	0.0766362	0.574259	1.22855	0.187289	0.0532708	0	4.44945
Firmicutes;Bacilli;Lactobacillales;Streptococcaceae;Lactococcus;Lactococcus sp. F9	0	0	0	0	0	0	0	0	0	0	0	0	0	0	0	0	0	0	0	0	0	0	0	0	0	0	0	0	0	0	0	0	0	0	0	0	0	0	0	0	0	0	0	0	0	0	0	0	0
Firmicutes;Bacilli;Lactobacillales;Streptococcaceae;Lactococcus;uncultured Lactococcus sp.	0	0	0	0	0	0	0	0	0	0	0	0	0	0	0	0	0	0	0	0	0	0	0	0.0125167	0	0	0	0	0	0	0	0	0	0	0	0	0	0	0	0	0	0	0	0	0	0	0	0	0.00327587
Firmicutes;Bacilli;Lactobacillales;Streptococcaceae;Lactococcus;__	0	0	0	0	0.0962464	0	0	0	0.0284455	0.0473473	0.0134306	1.26988	0	0.192411	0	0	0.143282	0.122502	0.814236	0.57379	0.667024	0.407783	0	0.929994	0	0.0394319	0	0	0	0	0.0508509	0	0	0.373476	0.491387	0.0634597	0.233274	0.368508	0.169743	0.247421	1.52452	0.244181	0.139989	1.11281	2.26094	0.373158	0	0.157604	0.549527
Firmicutes;Bacilli;Lactobacillales;Streptococcaceae;Lactovum;uncultured Firmicutes bacterium	0	0	0	0	0	0	0	0	0	0	0	0	0	0	0	0	0	0	0.0377617	0.0178451	0	0	0	0.0137684	0	0	0	0	0	0	0	0	0	0	0	0.0410621	0	0	0	0	0	0	0	0	0	0	0	0	0
Firmicutes;Bacilli;Lactobacillales;Streptococcaceae;Lactovum;uncultured bacterium	0	0	0	0	0	0	0	0	0	0	0	0	0	0	0	0	0	0	0	0.00411811	0.0116409	0	0	0.0275368	0	0	0	0	0	0	0	0	0	0	0.121466	0	0	0	0	0	0	0	0	0	0	0	0	0	0.00737071
Firmicutes;Bacilli;Lactobacillales;Streptococcaceae;Streptococcus;Ambiguous_taxa	0	0	0	0	0	0	0	0.199732	0	0	0	0.315801	0	0	0	0	0.0165326	0.0373137	0	0.200415	0.0849786	0.0135364	0	0.0325435	0.0989288	0.159244	0.0656058	0.0231927	0.0478401	0.059013	0.177413	0.227547	0.601745	0.417996	0.604572	0.431775	0.184753	0.813788	0.567866	0.565909	0.217544	0.0207814	0.0449599	0.184477	0.322622	0.0936443	0.00837113	0.0190212	0.0884485
Firmicutes;Bacilli;Lactobacillales;Streptococcaceae;Streptococcus;Streptococcus agalactiae	0	0	0	0	0	0	0	0	0	0	0	0	0	0	0	0	0	0	0	0	0	0	0	0	0	0	0	0	0	0	0	0	0	0	0	0	0	0	0	0	0	0	0	0	0	0	0.00684911	0	0
Firmicutes;Bacilli;Lactobacillales;Streptococcaceae;Streptococcus;Streptococcus equinus	0	0	0	0	0	0	0	0	0	0	0	0	0	0	0	0	0	0	0	0	0	0	0	0	0	0	0	0	0	0	0	0	0	0	0	0	0	0	0	0	0.539578	0	0	0.185965	0.384566	0.0681049	0	0	0
Firmicutes;Bacilli;Lactobacillales;Streptococcaceae;Streptococcus;Streptococcus iniae	0	0	0	0	0	0	0	0	0	0	0	0	0	0	0	0	0	0.0239371	0	0.013727	0.0151332	0	0	0	0	0.0629393	0.01068	0	0	0	0.0135602	0	0	0	0	0	0	0	0	0	0	0	0	0	0	0	0	0	0
Firmicutes;Bacilli;Lactobacillales;Streptococcaceae;Streptococcus;Streptococcus orisuis	0	0	0	0	0	0	0	0	0	0	0	0	0	0	0	0	0.0202065	0.00774435	0	0.0343176	0.00931272	0	0	0.057577	0	0.00985797	0	0	0.00387893	0	0.0508509	0	0.050408	0.207761	0.233271	0.120698	0	0.113879	0.120363	0.128975	0.774251	0.0121225	0.0122618	0.360028	1.05046	0.0248299	0	0.059781	0
Firmicutes;Bacilli;Lactobacillales;Streptococcaceae;Streptococcus;Streptococcus pneumoniae	0	0	0	0	0	0	0	0	0	0	0	0	0	0	0	0	0	0	0	0	0	0	0	0.0212785	0	0	0	0	0	0	0	0	0	0	0	0	0	0	0	0	0.0291201	0	0	0	0	0	0	0	0
Firmicutes;Bacilli;Lactobacillales;Streptococcaceae;Streptococcus;Streptococcus salivarius subsp. thermophilus	0	0	0	0	0	0	0	0.386366	0	0	0	0	0	0	0	0	0	0	0	0	0	0	0	0	0	0	0	0	0	0	0	0.0839001	0	0	0	0	0.0149296	0	0	0	0	0	0	0	0	0	0	0	0.135949
Firmicutes;Bacilli;Lactobacillales;Streptococcaceae;Streptococcus;Streptococcus sobrinus	1.16382	0.0150047	0.83246	0.737645	0.783721	0	0	0.96264	0.368013	0.165076	0.32532	0.093406	0.32007	0.0451747	0	0	0.308608	0.0232331	0.0188808	0.037063	0	0	0	0.0212785	0.0200949	0.105404	0.1068	0.0520079	0.0206876	0.0614719	0.0598911	0.0813577	0	0.0667804	0.0262257	0.0211532	0	0.0934065	0.0617246	0.265845	0.0719437	0	0	0	0	0	0	0	0.0286639
Firmicutes;Bacilli;Lactobacillales;Streptococcaceae;Streptococcus;Streptococcus sp. oral clone ASCF07	0	0	0	0	0	0	0	0	0	0	0	0	0	0	0	0	0	0	0	0.013727	0.00931272	0	0	0	0	0	0	0	0	0	0	0.0114409	0	0	0	0	0	0	0	0	0	0	0	0	0	0	0	0	0
Firmicutes;Bacilli;Lactobacillales;Streptococcaceae;Streptococcus;Streptococcus sp. oral clone FN042	0.0908889	0	0	0	0	0	0	0	0	0	0	0	0	0	0	0	0	0	0	0	0	0.0118443	0	0	0	0	0	0	0	0	0	0	0	0	0	0	0	0	0	0	0	0	0	0	0	0	0	0	0
Firmicutes;Bacilli;Lactobacillales;Streptococcaceae;Streptococcus;uncultured Firmicutes bacterium	0	0	0	0	0	0	0	0	0	0	0	0	0	0	0	0	0	0	0	0	0	0	0	0	0	0	0	0	0	0	0	0	0	0.0469936	0	0	0	0	0	0	0	0	0	0	0	0	0	0	0
Firmicutes;Bacilli;Lactobacillales;Streptococcaceae;Streptococcus;uncultured Streptococcus sp.	0	0	0	0	0.164994	0	0	0	0	0	0	0	0	0	0	0	0	0	0	0	0	0	0	0	0	0	0	0	0	0	0	0	0	0	0	0	0	0	0	0	0	0	0	0	0	0	0	0	0.00409484
Firmicutes;Bacilli;Lactobacillales;Streptococcaceae;Streptococcus;uncultured bacterium	0	0	0	0	0	0	0	0	0	0	0	0	0	0	0	0	0	0	0	0	0	0	0	0	0	0	0	0	0	0	0	0	0	0	0	0	0	0	0	0	0	0	0	0	0	0	0	0	0
Firmicutes;Bacilli;Lactobacillales;Streptococcaceae;Streptococcus;__	1.13279	0.0167699	1.01779	1.32492	0.398735	0	0	0.6876	0.554686	0.280245	0.467087	0.125653	0.472104	0.445054	0	0	0.580477	0.512535	1.55295	0.864803	1.06863	1.13029	0	1.4557	0.340068	0.333654	0.44856	0.1251	0.14352	0.425385	0.487039	0.279667	3.63568	4.34815	3.81101	4.26549	1.60679	5.0785	4.64169	4.90366	6.17688	0.491826	0.323916	4.29951	5.40715	0.957016	0.0289184	0.494552	0.24569
Firmicutes;Bacilli;Lactobacillales;__;__;__	0.330304	0.0203004	1.09222	0.278245	1.3337	0	0	0.697423	0	0.00511862	0	0.0900701	0	0	0	0	0.0202065	0.0288653	0.0708031	0.11668	0.038415	0.071066	0	0.0600804	0	0	0	0	0	0.0245888	0.0101702	0	0.0724615	0.336376	0.0427893	0.0111988	0.0839787	0	0.0339485	0.0579069	0	0	0	0	0	0	0	0	0.160518
Firmicutes;Clostridia;Clostridiales;Caldicoprobacteraceae;Caldicoprobacter;uncultured bacterium	0	0	0	0.314949	0.0595811	0	0	0	0	0.0102372	0	0.108974	0	0.0702717	0	0	0	0.0232331	0	0	0	0	0	0	0.0185491	0	0.01068	0	0	0	0	0	0.012602	0.098934	0	0.0124431	0.0205281	0	0.0740695	0	0.243238	0	0	0	0	0	0.00304405	0.00815195	0
Firmicutes;Clostridia;Clostridiales;Caldicoprobacteraceae;Caldicoprobacter;__	0	0	0.00911452	0	0	0	0	0	0	0	0	0	0	0	0	0	0	0	0	0	0	0	0	0	0	0	0	0	0	0	0	0	0	0	0	0	0	0	0.0339485	0	0	0	0.00306545	0.00892631	0	0	0	0	0
Firmicutes;Clostridia;Clostridiales;Clostridiaceae 1;Ambiguous_taxa;Ambiguous_taxa	0	0	0	0	0	0	0	0	0	0	0	0	0	0.00836568	0	0	0	0	0	0	0	0	0	0	0.0247322	0	0	0	0	0	0	0	0	0	0	0	0	0	0	0	0	0	0	0	0	0	0	0	0
Firmicutes;Clostridia;Clostridiales;Clostridiaceae 1;Caloramator;Ambiguous_taxa	0	0	0	0	0	0	0	0	0	0.0102372	0	0	0	0	0	0	0	0	0	0	0	0	0	0	0	0	0	0	0	0	0	0	0	0	0	0	0	0	0	0	0	0	0	0	0	0	0	0	0
Firmicutes;Clostridia;Clostridiales;Clostridiaceae 1;Clostridium sensu stricto 10;uncultured bacterium	0	0	0	0	0	0	0	0	0	0	0	0	0	0	0	0	0	0	0	0	0	0	0	0	0	0	0	0	0	0	0	0	0	0	0	0	0	0	0	0	0	0	0	0	0	0	0	0	0
Firmicutes;Clostridia;Clostridiales;Clostridiaceae 1;Clostridium sensu stricto 11;Ambiguous_taxa	0	0	0	0	0	0	0	0	0	0	0	0	0	0	0	0	0	0	0	0.0343176	0	0	0	0	0	0.0265407	0	0	0	0.0147533	0	0	0	0	0	0	0	0	0	0	0	0	0	0	0	0	0	0	0
Firmicutes;Clostridia;Clostridiales;Clostridiaceae 1;Clostridium sensu stricto 11;Clostridium sp. DY2632	0	0	0	0	0	0	0	0	0	0	0	0	0	0	0	0	0	0	0	0	0	0	0	0	0	0	0	0	0	0	0	0	0	0	0	0	0	0	0	0	0	0	0	0	0	0	0	0	0
Firmicutes;Clostridia;Clostridiales;Clostridiaceae 1;Clostridium sensu stricto 12;Ambiguous_taxa	0	0	0	0	0	0	0	0	0	0	0	0	0	0	0	0	0	0	0	0	0	0	0	0	0	0	0	0	0	0	0	0	0	0	0	0	0	0	0	0	0	0	0	0	0	0	0	0	0
Firmicutes;Clostridia;Clostridiales;Clostridiaceae 1;Clostridium sensu stricto 12;Clostridium algifaecis	0	0	0	0	0	0	0	0	0	0	0	0	0	0	0	0	0	0	0	0	0	0	0	0	0	0	0	0	0	0	0	0	0	0	0	0	0	0	0	0	0	0	0	0	0	0	0	0	0
Firmicutes;Clostridia;Clostridiales;Clostridiaceae 1;Clostridium sensu stricto 12;Clostridium tyrobutyricum	0	0	0	0.0745933	0	0	0	0	0.186673	0	0	0	0	0.0234239	0	0	0	0	0	0	0	0	0	0	0	0	0	0	0	0	0	0	0	0	0	0	0	0	0	0	0	0	0	0	0	0	0	0	0
Firmicutes;Clostridia;Clostridiales;Clostridiaceae 1;Clostridium sensu stricto 12;uncultured Clostridium sp.	0	0	0	0	0	0	0	0	0	0	0	0	0	0	0	0	0	0	0	0	0	0	0	0	0	0	0	0	0	0	0	0	0	0	0	0	0	0	0	0	0	0	0	0	0	0	0	0	0
Firmicutes;Clostridia;Clostridiales;Clostridiaceae 1;Clostridium sensu stricto 12;uncultured bacterium	0	0	0	0	0	0	0	0	0	0	0	0	0	0	0	0	0	0	0	0	0	0	0	0	0	0	0	0	0	0	0	0	0	0	0	0	0	0	0	0	0	0	0	0	0	0	0	0	0.00900864
Firmicutes;Clostridia;Clostridiales;Clostridiaceae 1;Clostridium sensu stricto 13;Ambiguous_taxa	0	0	0	0	0.137495	0	0	0	0	0	0	0	0	0	0	0	0	0	0	0	0	0	0	0	0	0	0	0	0	0	0	0	0	0.0272068	0	0	0	0	0	0	0	0	0	0	0	0	0	0	0.00573277
Firmicutes;Clostridia;Clostridiales;Clostridiaceae 1;Clostridium sensu stricto 13;__	0	0	0	0	0	0	0	0	0	0	0	0	0	0	0	0	0	0	0	0	0	0	0	0	0	0	0	0	0	0	0	0	0	0	0	0	0	0	0	0	0	0	0	0	0	0	0	0	0
Firmicutes;Clostridia;Clostridiales;Clostridiaceae 1;Clostridium sensu stricto 14;uncultured soil bacterium	0	0	0	0	0	0	0	0	0	0	0	0	0	0	0	0	0	0	0	0	0	0	0	0	0	0	0	0	0	0	0	0	0	0	0	0	0	0	0	0	0	0	0	0	0	0	0	0	0
Firmicutes;Clostridia;Clostridiales;Clostridiaceae 1;Clostridium sensu stricto 15;Ambiguous_taxa	0.587453	0.0476619	0	0.633451	0.34832	0	0	0.255394	1.48628	0.167635	0.405904	0.0989659	0.298066	0.234239	0	0	0.10838	0.0161927	0.023601	0	0.00814863	0.0135364	0	0.0050067	0	0.0257824	0.154097	0.00773091	0.054305	0.100814	0.0305105	0.0241531	0	0	0.0483105	0	0	0	0.0154311	0	0	0	0	0	0	0.00212828	0.0251134	0	0.0933623
Firmicutes;Clostridia;Clostridiales;Clostridiaceae 1;Clostridium sensu stricto 15;__	0.0421193	0	0	0	0	0	0	0	0	0	0.0208921	0.093406	0.0160035	0	0	0	0	0	0	0	0	0	0	0	0	0	0	0	0	0	0	0	0	0	0	0	0	0	0	0	0	0	0	0	0	0	0	0	0
Firmicutes;Clostridia;Clostridiales;Clostridiaceae 1;Clostridium sensu stricto 16;Ambiguous_taxa	0	0	0	0	0	0	0	0	0	0	0	0	0	0	0	0	0	0	0	0	0	0	0	0	0	0	0	0	0	0	0	0	0	0	0	0	0	0	0	0	0	0	0	0	0	0	0	0	0
Firmicutes;Clostridia;Clostridiales;Clostridiaceae 1;Clostridium sensu stricto 18;Ambiguous_taxa	0.543117	0.0282441	0.414711	1.12719	1.19621	0	0	0.314332	1.47205	0.0934149	0.243244	0.20238	0.108024	0.0451747	0	0	0.236967	0.104197	0.0991244	0.135898	0.0826504	0.0321489	0	0.107644	0.0618305	0.0417068	0.132737	0.0281124	0	0.0319654	0.0327706	0.184326	0	0	0.186341	0.0174203	0	0	0.0154311	0.0473784	0	0	0	0	0.0490386	0	0.0563149	0	0
Firmicutes;Clostridia;Clostridiales;Clostridiaceae 1;Clostridium sensu stricto 18;Clostridium botulinum	0	0	0	0	0	0	0	0	0	0	0	0	0	0	0	0	0	0	0	0	0	0	0	0	0	0	0	0	0	0	0	0	0	0	0	0	0	0	0	0	0	0	0	0	0	0	0.00608809	0	0
Firmicutes;Clostridia;Clostridiales;Clostridiaceae 1;Clostridium sensu stricto 18;Clostridium sp. mt5	0	0	0	0	0	0	0	0	0.0266676	0	0	0	0	0	0	0	0	0	0	0	0.0162973	0	0	0	0	0	0	0	0	0	0	0	0	0	0	0	0	0	0	0	0	0	0	0	0	0	0	0	0
Firmicutes;Clostridia;Clostridiales;Clostridiaceae 1;Clostridium sensu stricto 18;__	0	0	0	0.0272325	0	0	0	0	0	0	0	0.0144557	0	0.00836568	0	0	0	0	0	0	0	0	0	0	0	0	0	0	0	0	0	0	0	0	0	0	0	0	0	0	0	0	0	0	0	0	0	0	0
Firmicutes;Clostridia;Clostridiales;Clostridiaceae 1;Clostridium sensu stricto 1;Ambiguous_taxa	0	0	0	0.0722252	0	0	0	0	0	0	0	0.108974	0.00800176	0	0	0	0	0	0	0	0.0372509	0.0338409	0	0	0	0.037157	0	0	0	0.0098355	0	0	0	0	0	0	0	0	0	0	0	0	0	0	0	0	0	0	0
Firmicutes;Clostridia;Clostridiales;Clostridiaceae 1;Clostridium sensu stricto 1;Clostridium beijerinckii	0	0	0	0	0	0	0	0	0	0	0	0	0	0	0	0	0	0	0	0	0	0	0	0	0	0	0	0	0	0	0	0	0	0	0	0	0	0	0	0	0	0	0	0	0	0	0	0	0
Firmicutes;Clostridia;Clostridiales;Clostridiaceae 1;Clostridium sensu stricto 1;Clostridium perfringens	0.684992	0.045014	0.504337	1.171	0.160411	0	0	0.96264	0.618689	1.37051	1.7997	2.21394	2.00644	1.66979	0	0	0.167163	0.0753314	0.0778835	0.0851076	0	0.0744501	0	0.0675904	0.0247322	0.0690058	0.12816	0.0330321	0.0620628	0.122944	0.0610211	0.0457637	0	0	0	0	0	0	0	0	0	0	0	0	0	0	0	0	0
Firmicutes;Clostridia;Clostridiales;Clostridiaceae 1;Clostridium sensu stricto 1;uncultured Clostridiales bacterium	0	0	0	0	0	0	0	0	0	0	0	0	0	0.0401553	0	0	0	0.0119685	0	0.00960892	0	0	0	0	0	0	0.0167829	0	0	0	0	0	0	0	0	0	0	0	0	0	0	0	0	0	0	0	0	0	0
Firmicutes;Clostridia;Clostridiales;Clostridiaceae 1;Clostridium sensu stricto 1;uncultured bacterium	0	0	0	0	0	0	0	0.0949543	0	0	0.113414	0	0	0	0	0	0	0	0	0	0	0	0	0	0.00618305	0	0	0	0	0	0	0	0.0157525	0	0	0	0	0	0	0	0	0	0	0	0	0	0	0	0
Firmicutes;Clostridia;Clostridiales;Clostridiaceae 1;Clostridium sensu stricto 1;__	0.0310352	0	0	0.0710412	0	0	0	0.173537	0.168895	0.350626	0.302935	0.0811742	0.378083	0.073618	0	0	0	0	0.0354016	0	0.0314304	0.00676819	0	0	0	0.0606644	0.154097	0.00913653	0	0.0958961	0.0745813	0	0.12917	0.0173134	0.200144	0.0796357	0.121303	0.0959656	0	0.0315856	0	0	0	0.00297544	0	0	0.00913214	0	0.0106466
Firmicutes;Clostridia;Clostridiales;Clostridiaceae 1;Clostridium sensu stricto 2;Ambiguous_taxa	0	0	0	0	0	0	0	0	0	0	0	0.0144557	0	0	0	0	0	0	0	0	0	0	0	0	0	0	0	0	0	0	0	0	0	0	0	0	0	0	0	0	0	0	0	0	0	0	0	0	0
Firmicutes;Clostridia;Clostridiales;Clostridiaceae 1;Clostridium sensu stricto 5;Ambiguous_taxa	0	0	0	0	0	0	0	0	0	0	0	0	0	0	0	0	0	0	0	0	0	0	0	0	0	0	0	0	0	0	0	0	0	0	0	0	0	0	0	0	0	0	0	0	0	0	0	0	0
Firmicutes;Clostridia;Clostridiales;Clostridiaceae 1;Clostridium sensu stricto 5;Clostridium algidicarnis	0.179561	0	0.13368	0.484264	0.366653	0	0	0.48132	0.202674	0.0383897	0.219367	0.0333593	0.332073	0.0819837	0	0	0	0.00492822	0	0	0	0	0	0	0	0.0121329	0	0.00351405	0	0	0.0124302	0	0	0	0.0165636	0	0	0	0	0	0.0359718	0	0	0	0	0.00780369	0	0	0.00900864
Firmicutes;Clostridia;Clostridiales;Clostridiaceae 1;Clostridium sensu stricto 5;__	0	0.0255962	0	0.143266	0	0	0	0.117874	0	0.0230338	0	0	0	0	0	0	0	0	0	0	0	0	0	0	0	0	0	0	0	0	0	0	0	0	0	0	0	0	0	0	0	0	0	0	0	0	0	0	0
Firmicutes;Clostridia;Clostridiales;Clostridiaceae 1;Clostridium sensu stricto 7;Clostridium sp. SN-1	0	0	0	0	0	0	0	0	0	0	0	0	0	0	0	0	0	0	0	0	0	0	0	0	0	0	0	0	0	0	0	0	0	0	0	0	0	0	0	0	0	0	0	0	0	0	0	0	0
Firmicutes;Clostridia;Clostridiales;Clostridiaceae 1;Clostridium sensu stricto 7;uncultured Clostridium sp.	0.696076	0.0432488	0.507375	1.27874	0.270407	0	0	0.419109	1.13248	0.0793387	0.202952	0.544868	1.15625	0.535404	0	0	0	0.104901	0.0495622	0.267677	0.0849786	0.0744501	0	0	0.159214	0.0417068	0.141892	0	0.053012	0	0	0.18814	0	0	0	0	0	0	0	0	0.0513883	0	0	0.058021	0	0	0.0433777	0	0.0475001
Firmicutes;Clostridia;Clostridiales;Clostridiaceae 1;Clostridium sensu stricto 7;uncultured bacterium	0	0	0	0.24746	0.0962464	0	0	0.268492	0.693358	1.80432	1.35799	3.25698	0.644142	1.37532	0	0	0.0275543	0.0570266	0.0259612	0	0.0430713	0	0	0.0475636	0	0.0326071	0.114429	0.0182731	0.0051719	0.0295065	0	0.134749	0.0535585	0	0	0.0236418	0	0	0	0	0	0.0207814	0	0	0	0	0.00532708	0	0
Firmicutes;Clostridia;Clostridiales;Clostridiaceae 1;Clostridium sensu stricto 7;__	2.56706	0.0776713	1.01019	2.73035	1.19621	0	0	1.98749	3.63924	1.58421	2.79656	2.19282	2.2825	2.92799	0	0	0.0275543	0.456917	0.172288	0.420047	0.114081	0.0761421	0	0.28413	0.0958373	0.149386	0	0.0513051	0.0219806	0.135238	0.132212	0.0228818	0.0283545	0	0.0124227	0	0	0	0.067897	0.0710676	0	0	0	0	0.0800103	0.00354713	0.0996926	0	0.104009
Firmicutes;Clostridia;Clostridiales;Clostridiaceae 1;Clostridium sensu stricto 8;Ambiguous_taxa	0	0	0	0	0	0	0	0	0	0	0	0	0	0	0	0	0	0	0	0.0247086	0.0966195	0.19797	0	0	0.255051	0.229767	0.2136	0.148996	0.559858	0.491775	0.444098	0.156359	0.107117	0.0544137	0.64184	0.227708	0.380704	0.144588	0.54009	0.0684355	0.894157	0.0623441	0.01124	0.318372	0.467157	0.0390184	0	0	0.151509
Firmicutes;Clostridia;Clostridiales;Clostridiaceae 1;Clostridium sensu stricto 8;uncultured Bacillus sp.	0	0	0	0	0	0	0	0	0	0	0	0	0	0	0	0	0	0	0	0	0	0	0	0	0	0	0	0	0	0	0	0	0	0	0.146312	0	0	0.0435044	0.0277761	0.0631712	0	0	0	0	0	0	0	0	0
Firmicutes;Clostridia;Clostridiales;Clostridiaceae 1;Clostridium sensu stricto 8;uncultured bacterium	0	0	0	0	0	0	0	0	0	0	0	0	0	0	0	0	0	0	0	0	0	0	0	0	0	0	0	0	0	0	0	0	0	0	0	0	0	0	0	0	0	0	0	0	0	0	0	0	0
Firmicutes;Clostridia;Clostridiales;Clostridiaceae 1;Clostridium sensu stricto 8;__	0	0	0	0	0	0	0	0	0	0	0	0	0	0	0	0	0	0	0	0	0	0	0	0	0	0	0	0	0	0	0	0	0	0.0098934	0	0.08088	0	0	0.0339485	0	0	0	0	0	0	0	0	0	0
Firmicutes;Clostridia;Clostridiales;Clostridiaceae 1;Haloimpatiens;Ambiguous_taxa	0	0.00353051	0	0.0236804	0	0	0	0	0	0	0	0	0	0	0	0	0	0	0	0	0	0	0	0	0	0	0	0	0	0	0	0	0	0	0	0	0	0	0	0	0	0	0	0	0	0	0	0	0
Firmicutes;Clostridia;Clostridiales;Clostridiaceae 1;Hathewaya;Ambiguous_taxa	0.74928	0.00706102	0.41623	1.04667	0.265823	0	0	0.64176	1.32094	0.0895759	0.393965	0.302457	0.822181	0.62408	0	0	0.0642933	0.232331	0.0731632	0.10158	0.0442354	0.0152284	0	0.0325435	0.0170034	0.0318488	0.102223	0.0217871	0	0	0.0293805	0.0292379	0	0	0	0	0	0	0	0	0	0	0	0.0505824	0	0	0.0220693	0	0.0376725
Firmicutes;Clostridia;Clostridiales;Clostridiaceae 1;Proteiniclasticum;uncultured bacterium	0	0	0	0	0	0	0	0	0	0	0	0	0	0	0	0	0	0	0.0165207	0	0	0	0	0	0	0	0	0	0	0	0	0	0	0	0	0	0	0	0	0	0	0	0	0	0	0	0	0	0
Firmicutes;Clostridia;Clostridiales;Clostridiaceae 1;Sarcina;Ambiguous_taxa	0	0	0	0	0	0	0	0	0	0	0	0	0	0	0	0	0	0	0	0	0	0	0	0	0	0	0	0	0	0	0	0	0	0	0	0	0	0	0	0	0	0	0	0	0	0	0	0	0
Firmicutes;Clostridia;Clostridiales;Clostridiaceae 1;uncultured bacterium;uncultured bacterium	0	0	0.0972216	0.140898	0	0	0	0.02292	0	0.0486269	0	0	0.0160035	0.0133851	0	0	0	0	0	0.00549081	0	0	0	0	0.0139119	0	0	0	0	0	0	0	0	0.00742005	0	0	0	0	0	0	0	0	0	0	0	0	0	0	0.00573277
Firmicutes;Clostridia;Clostridiales;Clostridiaceae 1;uncultured;__	0	0	0	0	0	0	0	0	0	0.0422286	0	0	0	0	0	0	0	0	0	0	0	0	0	0	0	0	0	0	0	0	0	0	0	0	0	0	0	0	0	0	0	0	0	0	0	0	0	0	0
Firmicutes;Clostridia;Clostridiales;Clostridiaceae 1;__;__	0.551984	0.00970891	0.13368	0.422695	0.352903	0	0	0.111326	0.336012	0.278965	0.180567	0.501501	0.262058	0.4484	0	0	0	0.0161927	0	0.0219632	0	0.0778342	0	0.0150201	0.211769	0.0576312	0.0610286	0.0175702	0.0956802	0.172121	0.164983	0.165258	0	0.108827	0.197383	0.0572381	0.0447887	0.212404	0	0.218467	0	0	0	0.0282667	0	0.0113508	0.00228304	0	0.100733
Firmicutes;Clostridia;Clostridiales;Clostridiaceae 2;Alkaliphilus;Ambiguous_taxa	0	0	0	0	0	0	0	0	0	0	0	0	0	0	0	0	0	0	0	0	0	0	0	0	0	0	0	0	0	0	0	0	0	0	0	0	0	0	0	0	0	0	0	0	0	0	0	0	0
Firmicutes;Clostridia;Clostridiales;Clostridiaceae 2;__;__	0	0	0	0	0	0	0	0	0	0	0	0	0	0	0	0	0	0	0	0	0	0	0	0	0	0	0	0	0	0	0	0	0	0.0371002	0	0	0	0	0	0.0157928	0	0	0	0	0	0.0113508	0	0	0
Firmicutes;Clostridia;Clostridiales;Defluviitaleaceae;Defluviitalea;uncultured bacterium	0	0	0	0	0	0	0	0	0	0	0	0	0	0	0	0	0	0	0	0	0	0	0	0	0	0	0	0	0	0	0	0	0	0	0.0165636	0	0	0	0	0	0	0	0	0	0	0	0	0	0
Firmicutes;Clostridia;Clostridiales;Defluviitaleaceae;Defluviitalea;__	0	0	0	0	0	0	0	0	0	0	0	0	0	0	0	0	0	0	0	0	0	0	0	0	0	0	0	0	0	0	0	0	0.031505	0	0.0317469	0.0734141	0.0933097	0.0332681	0	0.0157928	0	0.00519534	0.00715271	0.0565333	0.0180668	0.00993197	0	0	0
Firmicutes;Clostridia;Clostridiales;Defluviitaleaceae;Defluviitaleaceae UCG-011;__	0	0	0	0	0	0	0	0	0	0.0127966	0	0.0389192	0.0140031	0	0	0	0	0	0	0	0	0	0	0	0	0	0	0	0	0	0	0	0	0	0	0	0	0	0	0	0	0	0	0	0	0	0	0	0
Firmicutes;Clostridia;Clostridiales;Eubacteriaceae;Garciella;Ambiguous_taxa	0	0	0	0	0	0	0	0.147343	0	0	0	0	0.0520114	0	0	0	0	0	0	0	0	0	0	0	0	0	0	0	0	0	0	0.0152546	0	0	0	0	0	0	0	0	0	0	0	0	0	0	0	0	0
Firmicutes;Clostridia;Clostridiales;Family XI;Anaerococcus;Ambiguous_taxa	0	0	0	0	0	0	0	0.00654857	0	0	0	0	0	0.00501941	0	0	0	0.0471701	0.0188808	0	0	0.0270728	0	0	0	0.0242658	0.0259372	0	0	0.0516364	0.0316406	0	0	0	0	0	0	0.0153545	0.0493797	0.0552748	0	0	0	0.0550456	0	0	0	0	0.026207
Firmicutes;Clostridia;Clostridiales;Family XI;Anaerococcus;__	0.0864553	0	0	0	0	0	0	0	0	0	0.0223844	0	0	0	0	0	0	0	0	0	0	0	0	0	0	0	0	0	0	0	0	0	0	0	0	0	0	0	0	0	0	0	0	0	0	0	0	0	0
Firmicutes;Clostridia;Clostridiales;Family XI;Anaerosalibacter;Ambiguous_taxa	0.192862	0.0229483	0.138237	0.602666	0.132912	0	0	0.09168	0.533352	0.00383897	0.126845	0.104526	0.206045	0.073618	0	0	0.0532716	0.0781476	0.0542824	0.00960892	0.00582045	0.00507614	0	0.0112651	0.0154576	0.034882	0.0549258	0.00351405	0.0362033	0.00737663	0.0169503	0.0673743	0.0283545	0.0791472	0	0.016176	0	0.0447839	0	0.0473784	0.0119906	0	0	0.058021	0	0.00354713	0.0334845	0	0.0401294
Firmicutes;Clostridia;Clostridiales;Family XI;Finegoldia;Ambiguous_taxa	0	0	0	0	0	0	0	0	0	0	0	0	0	0	0	0	0	0	0	0	0	0	0	0	0	0	0	0	0	0.00491775	0	0	0	0	0	0	0	0	0	0	0	0	0	0	0	0	0	0	0
Firmicutes;Clostridia;Clostridiales;Family XI;Gallicola;uncultured bacterium	1.26358	0.0273615	1.05273	0.602666	0.563729	0	0	0.579549	0.615133	0.214982	0.66407	0.800623	1.99644	0.931937	0	0	0.271869	0.379473	0.0660829	0.252577	0.101276	0.0609137	0	0.0826105	0.200949	0.04474	0.126634	0.0520079	0.0568909	0.0442598	0.0881416	0.143647	0	0	0.0538317	0	0	0.0537407	0	0.0736997	0	0	0.00306545	0	0.0929152	0	0.0106542	0	0.0131035
Firmicutes;Clostridia;Clostridiales;Family XI;Gottschalkia;[Clostridium] purinilyticum	0	0	0.00607635	0	0	0	0	0	0	0	0	0	0	0	0	0	0	0	0	0	0	0	0	0	0	0	0	0	0	0	0	0	0	0	0	0	0	0	0	0	0	0	0	0	0	0	0	0	0
Firmicutes;Clostridia;Clostridiales;Family XI;Gottschalkia;uncultured bacterium	0	0	0	0	0	0	0	0	0	0	0	0	0	0	0	0	0	0	0	0	0	0.0152284	0	0	0	0	0	0	0	0	0	0	0	0	0	0	0	0	0	0	0	0	0	0	0	0	0	0	0
Firmicutes;Clostridia;Clostridiales;Family XI;Keratinibaculum;Ambiguous_taxa	0	0	0	0	0.114579	0	0	0	0	0	0	0	0	0	0	0	0	0	0	0	0	0	0	0	0	0	0	0	0	0	0	0	0	0	0	0	0	0	0	0	0	0	0	0	0	0	0	0	0
Firmicutes;Clostridia;Clostridiales;Family XI;Peptoniphilus;Ambiguous_taxa	0	0	0	0	0	0	0	0	0	0	0	0.0111198	0	0	0	0	0.00918476	0.0478742	0.0708031	0.0919711	0	0.0338409	0	0.0337952	0.0216407	0.0401902	0.0488229	0	0	0	0.0429408	0.0851713	0	0	0	0.0696812	0	0	0	0	0	0	0	0	0	0	0	0	0
Firmicutes;Clostridia;Clostridiales;Family XI;Peptoniphilus;swine effluent bacterium CHNDP1	0.361339	0.0203004	0.48307	0.487816	0	0	0	0.500966	0.101337	0.0882963	0.798376	0.36028	1.61235	0.443381	0	0	0	0.00281613	0	0.0123543	0	0	0	0	0	0	0.0091543	0	0	0	0	0	0	0	0	0	0	0	0	0.0842283	0.0685178	0	0	0	0	0	0.0144592	0	0.0818967
Firmicutes;Clostridia;Clostridiales;Family XI;Peptoniphilus;swine manure bacterium 37-5	0	0	0.0455726	0.0485448	0.0962464	0	0	0	0	0	0	0.0422551	0	0	0	0	0	0.126726	0.0826037	0.175706	0.124558	0.0270728	0	0.0550737	0.114386	0.0576312	0.109852	0.0245983	0.0232736	0.0565541	0.0429408	0	0	0	0	0	0	0.0358272	0	0	0	0	0	0	0	0	0.00380506	0	0
Firmicutes;Clostridia;Clostridiales;Family XI;Peptoniphilus;uncultured bacterium	0	0	0	0	0	0	0	0	0	0	0	0	0	0	0	0	0	0	0	0	0	0	0	0	0	0	0	0	0	0	0.0158203	0	0	0	0.0179439	0	0	0	0.0216036	0	0	0	0	0	0	0	0	0	0
Firmicutes;Clostridia;Clostridiales;Family XI;Peptoniphilus;__	0	0	0	0	0	0	0	0.0491143	0.0373347	0.00767794	0	0	0.0440097	0.0970419	0	0	0	0	0	0	0	0	0	0	0	0	0	0	0	0	0	0	0	0	0	0	0	0	0	0	0.0102777	0	0	0	0	0.0638484	0	0	0.0229311
Firmicutes;Clostridia;Clostridiales;Family XI;Sedimentibacter;uncultured bacterium	0	0	0	0	0	0	0	0	0	0	0	0	0	0	0	0	0	0	0	0	0	0	0	0	0	0	0	0	0	0	0	0	0	0	0	0	0	0	0	0	0	0	0	0	0	0	0	0	0.0212931
Firmicutes;Clostridia;Clostridiales;Family XI;Sporanaerobacter;Ambiguous_taxa	0	0	0	0.0367046	0	0	0	0.0130971	0	0.0166355	0.141768	0.0400311	0	0	0	0	0	0.0675871	0	0.0123543	0.012805	0.0270728	0	0.00250335	0.0602847	0.0432234	0.0701829	0.0224899	0	0.0172121	0.0339006	0.0330515	0	0.133561	0.238792	0.0510166	0.0335915	0.120277	0.0617246	0.039482	0	0	0	0.0490947	0	0	0.00989315	0	0.0311208
Firmicutes;Clostridia;Clostridiales;Family XI;Sporanaerobacter;Sporanaerobacter sp. SN28	0	0	0	0	0	0	0	0	0	0	0	0.0100078	0	0	0	0	0	0	0	0	0	0	0	0	0	0	0	0	0	0	0	0	0	0	0	0	0	0	0	0	0	0	0	0	0	0	0	0	0
Firmicutes;Clostridia;Clostridiales;Family XI;Sporanaerobacter;uncultured bacterium	0.146309	0	0	0	0.0870801	0	0	0.124423	0.0533352	0	0.0596917	0.0756144	0	0.0334627	0	0	0	0	0	0	0	0	0	0	0	0	0	0	0	0	0	0	0	0	0	0	0	0	0	0	0	0	0	0	0	0	0	0	0
Firmicutes;Clostridia;Clostridiales;Family XI;Sporanaerobacter;__	0	0	0	0	0	0	0	0	0	0	0	0	0	0	0	0	0	0	0	0	0	0	0	0	0	0	0	0	0	0	0	0.0317803	0	0	0	0	0	0	0	0	0	0	0	0	0	0	0	0	0
Firmicutes;Clostridia;Clostridiales;Family XI;Tepidimicrobium;Ambiguous_taxa	0	0	0	0	0	0	0	0	0	0	0	0	0	0	0	0	0	0	0	0.0123543	0.00814863	0.0135364	0	0	0	0.00303322	0.0305143	0	0	0	0	0	0	0	0.0096621	0	0	0	0	0	0.0325459	0	0	0	0.0129049	0	0	0	0.0139224
Firmicutes;Clostridia;Clostridiales;Family XI;Tepidimicrobium;Clostridiaceae bacterium Aso2-CS323	0	0	0	0	0	0	0	0	0	0	0	0	0	0	0	0	0	0	0	0	0	0	0	0	0.0123661	0	0	0	0	0.0221299	0	0.0228818	0.06301	0	0	0	0	0	0	0	0.0393977	0.0502217	0	0	0	0	0	0	0
Firmicutes;Clostridia;Clostridiales;Family XI;Tepidimicrobium;Clostridiaceae bacterium Aso3-CS325	0	0.0229483	0	0.221412	0.160411	0	0	0.0753086	0	0.0499066	0.0656609	0.0800623	0	0	0	0	0	0	0	0	0	0	0	0	0	0	0.01068	0	0	0.0147533	0	0	0	0.136034	0	0.0510166	0	0	0	0	0	0.0121225	0	0.0773614	0.0542005	0	0	0	0
Firmicutes;Clostridia;Clostridiales;Family XI;Tepidimicrobium;Tepidimicrobium sp. GRC1	1.09288	0.0167699	0.7322	0.485448	1.13204	0	0	0.582823	0.504907	0.554091	0.537225	0.800623	0.434096	0.287779	0	0	0.0220434	0.0373137	0.0519223	0.0631443	0.0977836	0.0439932	0	0.0162718	0.097383	0.0727973	0.0625544	0.0140562	0.0103438	0.0491775	0.0339006	0.0572046	0	0	0.0524514	0.140607	0	0.0294295	0.0493797	0.178985	0.226109	0.0813937	0.0163491	0.40466	0.10582	0.0198639	0.0547929	0.0122279	0.0958192
Firmicutes;Clostridia;Clostridiales;Family XI;Tepidimicrobium;uncultured Tepidimicrobium sp.	0.0354689	0	0	0	0	0	0	0	0.0177784	0	0	0	0	0	0	0	0	0	0	0	0	0	0	0	0	0	0	0	0	0	0	0	0	0	0	0	0	0	0	0	0	0	0	0	0	0	0	0	0
Firmicutes;Clostridia;Clostridiales;Family XI;Tepidimicrobium;uncultured bacterium	0.146309	0	0	0.0911696	0.219992	0	0	0	0.0248898	0	0	0.0622707	0	0	0	0	0	0.0154887	0	0.0109816	0.00931272	0	0	0	0	0.00379153	0	0	0.0168087	0	0.0146903	0.04195	0.081913	0.0519403	0	0	0	0	0	0	0	0	0	0.0490947	0	0	0.0114152	0.00679329	0.00737071
Firmicutes;Clostridia;Clostridiales;Family XI;Tepidimicrobium;uncultured bacterium tbr1-1	0	0	0	0	0	0	0	0	0	0	0	0.0177916	0	0	0	0	0	0	0	0	0	0.0135364	0	0	0	0.0204742	0.0793372	0	0.0155157	0.0368831	0.0237304	0.0114409	0	0	0	0.105766	0	0.0511817	0.0277761	0.0815961	0.00685178	0.0883209	0.0194145	0.261839	0.255517	0.028377	0	0.00951061	0
Firmicutes;Clostridia;Clostridiales;Family XI;Tepidimicrobium;__	0	0	0	0	0	0	0	0.02292	0	0	0	0	0	0	0	0	0	0	0	0	0	0	0	0	0	0.0121329	0	0	0	0	0.0135602	0	0	0.0148401	0	0	0	0	0	0	0	0	0	0.0803368	0	0	0	0	0.026207
Firmicutes;Clostridia;Clostridiales;Family XI;Tissierella;Ambiguous_taxa	0	0	0	0	0	0	0	0	0	0	0	0	0	0	0	0	0	0	0	0	0	0	0	0.0137684	0	0	0	0	0	0	0	0	0	0	0	0	0	0.0127954	0	0	0	0	0	0	0	0	0	0	0
Firmicutes;Clostridia;Clostridiales;Family XI;Tissierella;Tissierella praeacuta	0	0	0	0	0	0	0	0	0	0	0	0	0	0	0	0	0	0	0	0	0	0	0	0	0	0	0	0	0	0	0	0	0	0	0	0	0	0	0	0	0	0.00692713	0	0	0	0	0	0	0
Firmicutes;Clostridia;Clostridiales;Family XI;Tissierella;uncultured Firmicutes bacterium	0	0	0	0.0307845	0	0	0	0	0	0	0	0.00555988	0	0	0	0	0	0	0	0	0	0	0	0	0	0	0.00610286	0	0	0	0	0	0	0	0.0096621	0	0	0	0	0	0	0	0	0	0	0	0	0	0
Firmicutes;Clostridia;Clostridiales;Family XI;Tissierella;uncultured bacterium	0.0487697	0	0.0121527	0	0	0	0	0.00982286	0	0	0.025369	0.0789503	0.0120026	0.0267702	0	0	0	0	0	0	0	0	0	0	0	0.00530814	0	0	0.00258595	0	0	0	0	0	0	0	0	0	0	0	0	0	0	0	0	0	0	0	0
Firmicutes;Clostridia;Clostridiales;Family XI;Tissierella;__	0	0	0	0	0.0504148	0	0	0	0	0	0	0	0	0	0	0	0.0220434	0	0	0	0.00698454	0	0	0	0.00463729	0.00454983	0	0	0	0	0	0	0.0283545	0.0148401	0	0	0	0	0	0	0	0	0	0	0	0	0	0	0
Firmicutes;Clostridia;Clostridiales;Family XI;W5053;Ambiguous_taxa	0	0	0	0.0106562	0	0	0	0	0.0977813	0	0	0	0.0200044	0.0200776	0	0	0	0.0154887	0	0	0	0	0	0	0	0	0	0	0	0	0	0	0	0	0	0	0	0	0	0	0	0	0	0	0	0	0.00380506	0	0
Firmicutes;Clostridia;Clostridiales;Family XI;uncultured;Ambiguous_taxa	0	0	0	0	0	0	0	0	0	0	0	0	0	0	0	0	0	0	0	0	0	0	0	0	0	0	0	0	0	0	0.00904016	0	0	0	0	0	0	0.00895679	0	0	0	0	0	0	0	0	0	0	0
Firmicutes;Clostridia;Clostridiales;Family XI;uncultured;uncultured bacterium	0	0	0	0	0	0	0	0	0	0	0.0313381	0	0.0980216	0	0	0	0	0	0	0	0	0	0	0	0	0	0	0	0	0	0	0.053391	0	0	0	0	0	0	0	0	0.0342589	0.0883209	0.00510908	0.0208281	0.129049	0.0127697	0.0175033	0	0
Firmicutes;Clostridia;Clostridiales;Family XI;__;__	0	0	0	0	0	0	0	0	0	0	0	0.00667186	0	0	0	0	0	0.022529	0	0	0	0	0	0.0050067	0	0	0	0	0	0	0	0	0	0	0	0.0385735	0	0	0	0	0	0	0	0	0	0	0	0	0
Firmicutes;Clostridia;Clostridiales;Family XIII;[Eubacterium] nodatum group;Ambiguous_taxa	0	0	0	0	0	0	0	0	0	0	0	0	0	0	0	0	0	0	0	0.0603989	0	0	0	0.0100134	0	0.0128912	0.00610286	0	0.00258595	0	0.00678012	0	0.179578	0.0544137	0.041409	0.0248861	0	0.0985247	0.0771557	0.0473784	0	0	0	0	0	0	0	0	0.0180173
Firmicutes;Clostridia;Clostridiales;Family XIII;[Eubacterium] nodatum group;uncultured bacterium	0	0	0	0	0	0	0	0	0.215119	0.00767794	0	0	0	0	0	0	0	0.0844838	0	0	0.0197895	0.0101523	0	0	0	0	0.04272	0	0	0	0.0327706	0.04195	0	0	0	0	0	0	0	0	0	0	0	0	0	0	0	0	0
Firmicutes;Clostridia;Clostridiales;Family XIII;uncultured;Ambiguous_taxa	0	0	0	0	0	0	0	0	0	0	0	0	0	0	0	0	0	0	0	0	0	0	0	0	0	0	0	0	0	0	0	0	0	0	0	0	0	0	0	0	0	0	0	0	0	0	0	0	0
Firmicutes;Clostridia;Clostridiales;Family XIII;uncultured;uncultured bacterium	0	0	0.0151909	0	0.027499	0	0	0.0327429	0	0	0	0	0	0	0	0	0	0	0	0	0	0	0	0	0	0	0.00762858	0	0	0	0	0	0	0	0	0	0	0	0	0	0	0	0	0	0	0	0.00456607	0	0
Firmicutes;Clostridia;Clostridiales;Family XIII;__;__	0	0	0	0	0	0	0	0	0	0	0	0	0	0.00669254	0	0	0	0	0.0165207	0	0	0	0	0	0	0	0	0	0	0	0	0	0	0	0	0	0	0	0	0	0	0	0	0	0	0	0.00456607	0	0
Firmicutes;Clostridia;Clostridiales;Family XVIII;Symbiobacterium;Ambiguous_taxa	0	0	0	0	0	0	0	0	0	0	0	0	0	0	0	0	0	0	0	0	0	0	0	0	0	0	0	0	0	0	0	0	0.031505	0	0	0	0	0.0127954	0.441331	0	0.00513883	0	0	0.0699228	0.113563	0	0	0	0
Firmicutes;Clostridia;Clostridiales;Family XVIII;uncultured;__	0	0	0	0	0	0	0	0	0	0	0	0	0	0	0	0	0	0	0	0	0	0	0	0	0	0	0	0	0	0	0	0	0.204782	0.665331	0.334033	0.815021	0.00933097	0.41969	0.203691	0.0658033	0	0	0	0	0	0	0	0	0
Firmicutes;Clostridia;Clostridiales;Family XVIII;__;__	0	0	0	0	0	0	0	0	0	0	0	0	0	0	0	0	0	0	0	0	0	0	0	0	0	0	0	0	0	0	0	0	0.0598595	0	0.0855786	0.0821243	0	0.103643	0	0.173721	0	0	0	0	0	0	0	0	0
Firmicutes;Clostridia;Clostridiales;Heliobacteriaceae;Hydrogenispora;Ambiguous_taxa	0	0	0	0	0	0	0	0	0	0	0	0	0	0	0	0	0	0	0	0	0	0	0	0	0	0	0	0	0	0	0	0	0	0	0	0	0	0	0	0	0	0	0	0	0	0	0	0	0
Firmicutes;Clostridia;Clostridiales;Heliobacteriaceae;Hydrogenispora;__	0	0	0	0	0	0	0	0	0	0	0	0	0	0	0	0	0	0	0	0	0	0	0	0	0	0	0	0	0	0	0	0	0	0	0.0179439	0	0	0	0	0	0	0	0	0	0	0	0	0	0
Firmicutes;Clostridia;Clostridiales;Lachnospiraceae;Anaerocolumna;uncultured bacterium	0	0	0	0	0	0	0	0	0	0	0	0	0	0	0	0	0	0	0	0	0	0	0	0	0	0	0	0	0	0	0	0	0	0.0766738	0	0.0771471	0.00933097	0.0524612	0.0123449	0.0157928	0	0	0	0	0	0	0	0	0
Firmicutes;Clostridia;Clostridiales;Lachnospiraceae;Anaerocolumna;__	0	0	0	0	0	0	0	0	0	0	0	0	0	0	0	0	0	0	0	0	0	0	0	0	0	0	0	0	0	0	0	0	0	0	0.0386484	0	0	0	0	0	0	0	0	0	0	0	0	0	0
Firmicutes;Clostridia;Clostridiales;Lachnospiraceae;Fusicatenibacter;Ambiguous_taxa	0	0	0	0	0	0	0	0	0	0	0	0	0	0	0	0	0	0	0	0	0	0	0	0	0	0	0	0	0	0	0	0	0	0	0	0	0	0	0	0	0	0	0	0	0	0	0	0	0.0171983
Firmicutes;Clostridia;Clostridiales;Lachnospiraceae;Herbinix;Ambiguous_taxa	0	0	0	0	0	0	0	0	0	0	0	0	0	0	0	0	0.0642933	0	0	0	0	0	0	0	0	0	0	0	0	0	0	0	0	0	0	0.0547495	0	0	0	0	0	0	0	0	0	0	0.00456607	0	0
Firmicutes;Clostridia;Clostridiales;Lachnospiraceae;Herbinix;Herbinix hemicellulosilytica	0	0	0	0	0	0	0	0	0	0	0	0	0	0	0	0	0	0	0	0	0	0	0	0	0	0	0	0	0	0	0	0	0	0	0	0	0	0	0	0	0	0	0.00204363	0	0.167764	0.00709426	0	0.00815195	0
Firmicutes;Clostridia;Clostridiales;Lachnospiraceae;Lachnoclostridium 5;Ambiguous_taxa	0	0	0	0	0	0	0	0	0	0	0	0	0	0	0	0	0	0	0	0	0	0	0	0	0	0	0	0	0	0	0	0	0	0	0	0	0	0	0	0	0	0	0	0	0	0	0	0	0
Firmicutes;Clostridia;Clostridiales;Lachnospiraceae;Lachnoclostridium 5;__	0	0	0	0	0	0	0	0	0	0	0	0	0	0	0	0	0	0	0	0	0	0	0	0	0	0	0	0	0	0	0	0	0	0	0	0	0	0	0	0	0	0	0	0	0	0	0	0	0
Firmicutes;Clostridia;Clostridiales;Lachnospiraceae;Shuttleworthia;Ambiguous_taxa	0	0	0	0	0	0	0	0	0	0	0	0	0	0	0	0	0	0	0	0	0	0	0	0	0	0	0	0	0	0	0	0	0	0	0	0	0	0	0	0	0	0	0	0	0	0	0	0	0
Firmicutes;Clostridia;Clostridiales;Lachnospiraceae;Syntrophococcus;__	0	0	0	0	0	0	0	0	0	0	0	0	0	0	0	0	0	0	0	0.00411811	0	0	0	0	0	0	0	0	0	0	0	0	0	0	0	0	0	0	0	0	0	0	0	0	0	0	0	0	0
Firmicutes;Clostridia;Clostridiales;Lachnospiraceae;[Eubacterium] hallii group;Ambiguous_taxa	0	0	0.0106336	0	0	0	0	0	0	0	0	0	0	0	0	0	0	0	0	0	0	0	0	0	0	0	0	0	0	0	0	0	0	0	0	0	0	0	0	0	0	0	0	0	0	0	0	0	0
Firmicutes;Clostridia;Clostridiales;Lachnospiraceae;__;__	0	0	0	0	0.160411	0	0	0	0.0977813	0.07422	0.114907	0.094518	0.400088	0.0936956	0	0	0.991954	1.04267	0.339855	0.634189	0.336422	0.225042	0	0.25409	0.530196	0.57707	0.628595	0.141968	0.165501	0.799134	0.406807	0.363567	0.0157525	0	0	0	0	0	0	0	0.152452	0	0	0	0	0	0	0	0.00818967
Firmicutes;Clostridia;Clostridiales;Peptococcaceae;Peptococcus;uncultured bacterium	0.175127	0.0176526	0.325085	0.0544649	0	0	0	0.242297	0.0906699	0.102372	0.434257	0.0400311	0.374082	0.0719449	0	0	0	0	0.0165207	0	0.0267741	0.0456853	0	0	0.0401898	0.00909966	0	0.00843372	0	0.0565541	0.0203404	0	0	0	0	0	0	0	0	0.00526427	0	0	0	0	0	0	0.00684911	0	0
Firmicutes;Clostridia;Clostridiales;Peptostreptococcaceae;Ambiguous_taxa;Ambiguous_taxa	0	0	0	0	0	0	0	0	0	0	0	0	0	0	0	0	0	0	0	0	0	0	0	0	0	0	0	0	0	0	0	0	0	0	0	0	0	0	0	0	0	0	0	0	0	0	0	0	0
Firmicutes;Clostridia;Clostridiales;Peptostreptococcaceae;Ambiguous_taxa;uncultured bacterium	0	0	0	0	0	0	0	0	0	0	0	0	0	0	0	0	0	0	0	0	0.00931272	0	0	0	0	0	0	0	0	0	0	0	0	0	0	0	0	0	0	0	0	0	0	0	0	0	0	0	0
Firmicutes;Clostridia;Clostridiales;Peptostreptococcaceae;Paraclostridium;uncultured Clostridium sp.	0	0.0194178	0.15039	0.0686732	0.0779137	0	0	0	0.497795	0	0.246228	0	0.406089	0.326262	0	0	0.135934	0.160519	0	0.0919711	0.0244459	0.0304569	0	0.0913722	0.0510102	0.0454983	0.0579772	0.014759	0	0.0221299	0	0	0	0	0	0	0	0	0	0	0	0	0	0	0	0	0.0289184	0	0.0237501
Firmicutes;Clostridia;Clostridiales;Peptostreptococcaceae;Paraclostridium;__	0.472179	0	0.606116	0.316133	0.288739	0	0	0.108051	0.368013	0.0179152	0.308905	0.173468	0.484107	0.45342	0	0	0.0642933	0.0359056	0.155767	0.0713805	0.0593686	0.037225	0	0.0638354	0.0850169	0.0454983	0.115954	0.0513051	0.0271525	0.0319654	0.0350306	0.0241531	0	0	0	0	0	0	0	0	0	0	0	0	0	0	0.0585979	0	0.0573277
Firmicutes;Clostridia;Clostridiales;Peptostreptococcaceae;Peptostreptococcus;Ambiguous_taxa	0	0	0	0	0	0	0	0	0	0	0	0	0	0	0	0	0	0	0	0	0.012805	0	0	0	0.0541017	0	0	0	0	0	0	0	0	0	0	0	0	0	0	0	0	0	0	0	0	0	0	0	0
Firmicutes;Clostridia;Clostridiales;Peptostreptococcaceae;Peptostreptococcus;uncultured bacterium	6.35114	0.394535	4.0666	4.76687	7.4843	0.00241132	0	5.94283	10.3293	1.99754	7.37192	5.88013	6.76949	8.64677	0	0	2.92443	2.68095	1.39482	1.84354	0.622788	0.597293	0	0.729726	1.23043	0.973664	1.60963	0.477208	0.316779	1.13108	0.958257	1.52037	0.229986	0.217655	0.311948	0.0360849	0	0	0.101846	0.0868604	0.19185	0.0173178	0.00613089	0.0684351	0.108401	0.0212828	0.152202	0.0176626	0.541337
Firmicutes;Clostridia;Clostridiales;Peptostreptococcaceae;Peptostreptococcus;__	0	0	0	0	0	0	0	0	0.234675	0	0	0	0	0	0	0	0.415151	0.0999725	0.0495622	0.0796167	0	0.0507614	0	0.0325435	0.137573	0.0849302	0.292937	0.0154618	0.0284455	0.17458	0.0994418	0.118223	0	0	0	0	0	0	0	0.0184249	0	0	0	0	0	0	0	0	0
Firmicutes;Clostridia;Clostridiales;Peptostreptococcaceae;Proteocatella;uncultured Clostridiales bacterium	0	0	0	0	0	0	0	0	0	0	0	0	0	0	0	0	0	0	0	0	0	0	0	0	0	0	0	0	0	0	0	0	0	0	0	0	0	0	0	0	0	0	0	0	0	0	0	0	0
Firmicutes;Clostridia;Clostridiales;Peptostreptococcaceae;Proteocatella;__	0	0	0	0	0	0	0	0	0	0	0	0	0	0	0	0	0	0	0	0	0	0	0	0	0	0	0	0	0	0	0	0	0	0	0	0	0	0	0	0	0	0	0	0	0	0	0	0	0
Firmicutes;Clostridia;Clostridiales;Peptostreptococcaceae;Romboutsia;Ambiguous_taxa	0	0	0	0	0	0	0	0	0	0	0.0134306	0	0.0660145	0.0953688	0	0	0	0	0	0	0	0	0	0	0	0	0	0	0	0	0	0	0	0	0	0	0	0	0	0	0	0	0	0	0	0	0	0	0
Firmicutes;Clostridia;Clostridiales;Peptostreptococcaceae;Romboutsia;uncultured bacterium	0	0	0	0	0	0	0	0	0	0	0	0	0	0	0	0	0	0	0	0	0	0	0	0	0	0	0	0	0	0	0	0	0	0	0	0	0	0	0	0	0	0	0	0	0	0	0	0	0
Firmicutes;Clostridia;Clostridiales;Peptostreptococcaceae;Romboutsia;__	0.15961	0.0414835	0.347871	0.6891	0.843302	0	0	0.347074	0.373347	0.246974	0.519318	0.608251	0.768169	0.481863	0	0	0.159815	0.171784	0	0.0988346	0.12805	0	0	0	0.139119	0.0492898	0	0.040763	0	0	0	0	0	0	0	0	0	0	0	0	0	0	0	0.0669473	0.10582	0	0.5563	0	0.0548708
Firmicutes;Clostridia;Clostridiales;Peptostreptococcaceae;__;__	5.66837	0.555173	4.84437	10.771	6.5585	0	0	7.55051	6.6509	4.5543	7.18688	8.78461	7.02355	6.61056	0	0	2.33844	2.42328	0.932241	1.42898	1.12102	0.502538	0	0.634599	1.51639	1.16627	1.40366	0.27761	0.486159	0.850771	0.857685	1.52418	0.664755	0.46499	0.525894	0.311077	0.057852	0.450399	0.219122	0.186881	0.560133	0.0103907	0.0173709	0.203817	0.0645245	0.0354713	9.22955	0.0122279	1.41272
Firmicutes;Clostridia;Clostridiales;Ruminococcaceae;CAG-352;uncultured rumen bacterium	0	0	0	0	0	0	0	0	0	0	0	0	0	0	0	0	0	0	0	0	0	0	0	0	0	0	0	0	0	0	0	0	0	0	0	0	0	0	0	0	0	0	0	0	0	0	0	0	0
Firmicutes;Clostridia;Clostridiales;Ruminococcaceae;Caproiciproducens;Ambiguous_taxa	0	0	0	0	0	0	0	0	0	0	0	0	0	0	0	0	0	0	0	0	0	0	0	0	0	0	0	0	0	0	0	0	0	0	0	0	0	0	0	0	0	0	0	0	0	0	0	0	0.0122845
Firmicutes;Clostridia;Clostridiales;Ruminococcaceae;Caproiciproducens;uncultured Ruminococcus sp.	0	0	0	0	0	0	0	0	0	0	0	0	0	0	0	0	0	0	0	0	0	0	0	0	0	0	0	0	0	0	0	0	0	0.0222601	0	0	0	0	0	0.0473784	0	0	0	0	0	0	0	0	0
Firmicutes;Clostridia;Clostridiales;Ruminococcaceae;Caproiciproducens;uncultured bacterium	0	0	0	0	0	0	0	0	0	0	0	0	0	0	0	0	0.0238804	0.0908201	0	0	0	0	0	0.0112651	0	0.00379153	0	0	0	0.0245888	0.0158203	0	0.860086	0.299275	0.507951	0.552472	0.472147	0.589869	0.407382	0.210571	0	0	0	0	0	0	0	0	0
Firmicutes;Clostridia;Clostridiales;Ruminococcaceae;Caproiciproducens;__	0	0	0	0	0	0	0	0	0	0	0	0	0.0120026	0	0	0	0	0	0	0	0	0	0	0	0	0	0	0	0	0	0	0	0	0	0	0	0.0802463	0	0	0	0.253516	0	0	0	0	0	0	0	0
Firmicutes;Clostridia;Clostridiales;Ruminococcaceae;Ethanoligenens;uncultured bacterium	0	0	0	0	0	0	0	0	0	0	0	0	0	0	0	0	0	0	0	0	0	0	0	0	0	0	0	0	0	0	0	0	0	0	0	0	0	0	0	0	0	0	0	0	0	0	0	0	0.0360346
Firmicutes;Clostridia;Clostridiales;Ruminococcaceae;Ethanoligenens;__	0	0	0	0	0	0	0	0	0	0	0	0	0	0	0	0	0	0	0	0.00686351	0	0	0	0.0112651	0	0	0	0	0	0	0	0	0	0	0	0	0	0	0	0	0	0	0	0	0	0	0	0	0
Firmicutes;Clostridia;Clostridiales;Ruminococcaceae;Negativibacillus;Ambiguous_taxa	0	0	0	0	0	0	0	0	0	0	0	0	0	0	0	0	0	0	0	0	0	0	0	0	0	0	0	0	0	0	0	0	0	0	0	0	0	0	0	0	0	0	0	0	0	0	0	0	0
Firmicutes;Clostridia;Clostridiales;Ruminococcaceae;Oscillibacter;Ambiguous_taxa	0	0	0	0	0	0	0	0	0	0	0	0	0	0	0	0	0	0	0	0	0	0	0	0	0	0	0	0	0	0	0	0	0	0	0	0	0	0	0	0	0	0	0	0	0	0.00922254	0	0	0
Firmicutes;Clostridia;Clostridiales;Ruminococcaceae;Ruminiclostridium;Clostridium merdae	0	0	0	0	0	0	0	0	0	0	0	0	0	0	0	0	0	0	0	0	0	0	0	0	0.00618305	0	0	0	0	0	0.0056501	0	0	0	0	0	0	0	0	0	0	0	0	0	0	0	0	0	0
Firmicutes;Clostridia;Clostridiales;Ruminococcaceae;Ruminiclostridium;uncultured Ruminiclostridium sp.	0	0	0	0	0	0	0	0	0	0	0	0	0	0.0334627	0	0	0	0	0	0	0	0	0	0	0	0	0	0	0	0	0	0	0	0	0	0	0.00746478	0	0	0	0	0	0	0	0	0	0	0	0
Firmicutes;Clostridia;Clostridiales;Ruminococcaceae;Ruminococcaceae UCG-008;uncultured bacterium	0	0	0	0	0	0	0	0	0	0	0	0	0	0	0	0	0	0	0	0	0	0	0	0	0	0	0	0	0	0	0	0	0	0	0	0	0	0	0	0	0	0	0	0	0	0	0	0	0
Firmicutes;Clostridia;Clostridiales;Ruminococcaceae;Ruminococcaceae UCG-012;uncultured bacterium	0	0	0	0	0	0	0	0.0196457	0	0	0	0	0	0	0	0	0	0	0.0165207	0	0	0	0	0	0	0	0	0	0	0	0	0	0	0	0	0	0	0	0	0	0	0	0	0	0	0	0	0	0
Firmicutes;Clostridia;Clostridiales;Ruminococcaceae;Ruminococcus 1;Ambiguous_taxa	0	0	0	0	0	0	0	0	0	0	0	0	0	0	0	0	0	0	0	0	0	0	0	0	0	0	0	0	0	0	0	0	0	0	0	0	0	0	0	0	0	0	0	0	0	0	0	0	0
Firmicutes;Clostridia;Clostridiales;Ruminococcaceae;Ruminococcus 1;Clostridium islandicum	0	0	0	0	0	0	0	0	0	0	0	0	0	0	0	0	0	0	0	0	0	0	0	0	0	0	0	0	0	0	0	0	0	0	0.0427893	0	0	0.0230317	0	0	0	0	0	0	0	0	0	0	0
Firmicutes;Clostridia;Clostridiales;Ruminococcaceae;[Eubacterium] coprostanoligenes group;uncultured bacterium	0.106407	0	0	0.0840655	0	0	0	0	0	0.0115169	0	0.0544868	0.0580128	0.0451747	0	0	0	0	0	0	0	0	0	0	0.0139119	0	0	0.00351405	0	0	0	0	0	0	0	0	0	0	0	0	0	0	0	0.00892631	0	0	0	0	0
Firmicutes;Clostridia;Clostridiales;Ruminococcaceae;uncultured;__	0	0	0	0	0	0	0	0	0	0	0	0	0	0	0	0	0	0	0	0	0	0	0	0	0	0	0	0	0	0	0	0	0	0	0	0	0	0	0.0277761	0	0	0	0	0	0	0	0	0	0
Firmicutes;Clostridia;Clostridiales;Ruminococcaceae;__;__	0.0332521	94.7086	0	0.0248644	0.0504148	0	0.0124856	0.0196457	0	0.154838	0.0731223	0	0.0200044	0.00501941	0	0.0131225	0.0404129	0.00844838	0	0.0576535	0	0.0101523	0	0.061332	0	0.0872051	0	0.00351405	0.0051719	0.0098355	0.0113002	0.183055	0.0409565	0.947293	0.0648741	0.0373292	0.00746478	0.014075	0.111104	0.0263213	0.287775	0.510876	0.0122618	0	2.23513	0.00922254	85.5309	0.0421184	0
Firmicutes;Clostridia;Clostridiales;__;__;__	0	0	0	0	0	0	0	0	0	0.0127966	0.0193998	0	0	0.0752911	0	0	0	0.0133766	0.023601	0	0	0.0152284	0	0.0187751	0.0340068	0.00758305	0	0	0.0142227	0.0319654	0.00452008	0	0	0	0	0	0	0	0	0	0	0	0	0	0	0	0.00380506	0	0
Firmicutes;Clostridia;M55-D21;uncultured Firmicutes bacterium;uncultured Firmicutes bacterium;uncultured Firmicutes bacterium	0.0399025	0	0	0	0	0	0	0	0	0	0	0	0	0	0	0	0	0	0	0	0	0	0	0	0	0	0	0	0	0	0	0	0	0	0	0	0	0	0	0	0	0	0	0	0	0	0	0	0.025388
Firmicutes;Clostridia;Thermoanaerobacterales;Family III;Tepidanaerobacter;Ambiguous_taxa	0	0	0	0	0	0	0	0	0	0	0	0	0	0	0	0	0	0	0	0	0	0	0	0	0	0	0	0	0	0	0	0	0	0	0	0	0	0	0.0123449	0	0	0	0	0	0	0	0	0	0
Firmicutes;Clostridia;Thermoanaerobacterales;Family III;Tepidanaerobacter;uncultured bacterium	0	0	0	0	0.0916632	0	0	0	0	0.0179152	0	0	0	0	0	0	0	0.0274572	0.00944042	0	0.0139691	0	0	0	0.0170034	0.0128912	0	0	0	0	0	0	0	0	0	0	0	0	0	0	0	0	0	0	0	0	0	0	0
Firmicutes;Clostridia;Thermoanaerobacterales;Family III;Thermoanaerobacterium;Ambiguous_taxa	0	0	0	0	0	0	0	0	0	0	0	0	0	0	0	0	0	0	0	0	0	0	0	0	0	0	0	0	0	0	0	0	0	0	0	0.08088	0.0130634	0.0422249	0.265416	0.136871	0	0	0	0	0	0	0	0	0
Firmicutes;Clostridia;Thermoanaerobacterales;Family III;Thermoanaerobacterium;uncultured bacterium	0	0	0	0	0	0	0	0	0	0	0	0	0	0	0	0	0	0	0	0	0	0	0	0	0	0	0	0	0	0	0	0.0127121	0.31505	0.368529	0.205665	0.3061	0.423626	0.342917	0.5154	0.210571	0	0	0	0	0	0	0	0	0
Firmicutes;Clostridia;Thermoanaerobacterales;Family III;Thermoanaerobacterium;__	0	0	0	0	0	0	0	0	0	0	0	0	0	0	0	0	0	0.0366097	0	0	0	0	0	0	0	0	0	0	0	0	0	0	0.217384	0.368529	0.223609	0.312321	0.28926	0.325004	0.4259	0.102653	0	0	0	0	0	0	0	0	0.0106466
Firmicutes;Clostridia;Thermoanaerobacterales;SRB2;uncultured bacterium;uncultured bacterium	0	0	0	0	0	0	0	0	0	0	0	0	0	0	0	0	0	0	0	0	0.0209536	0	0	0	0.00772881	0	0	0	0	0	0	0	0	0	0	0	0	0	0	0	0	0	0	0	0	0	0	0	0
Firmicutes;Clostridia;Thermoanaerobacterales;Thermoanaerobacteraceae;Caldanaerobacter;Ambiguous_taxa	0	0	0	0	0	0	0	0	0	0	0	0	0	0	0	0	0	0	0.0118005	0	0	0	0	0	0	0	0	0	0	0	0	0	0	0	0	0	0	0	0	0	0	0	0	0	0	0	0	0	0
Firmicutes;Clostridia;Thermoanaerobacterales;Thermoanaerobacteraceae;Caldanaerobacter;Caldanaerobacter subterraneus	0	0	0	0	0	0	0	0	0	0	0	0	0	0	0	0	0	0	0	0	0	0	0	0	0	0	0	0	0	0	0	0	0	0	0	0	0	0	0	0	0	0	0	0	0	0	0	0	0
Firmicutes;Erysipelotrichia;Erysipelotrichales;Erysipelotrichaceae;Asteroleplasma;__	0	0	0	0	0	0	0	0	0	0	0	0	0	0	0	0	0	0	0	0	0	0	0	0	0	0	0	0	0	0	0	0	0	0	0	0	0	0	0	0	0	0	0	0	0	0	0	0	0.00573277
Firmicutes;Erysipelotrichia;Erysipelotrichales;Erysipelotrichaceae;Erysipelothrix;Ambiguous_taxa	0	0	0.00911452	0	0	0	0	0	0	0.00383897	0	0	0	0	0	0	0	0	0	0	0.00814863	0	0	0	0	0	0	0	0	0	0	0	0	0	0	0	0	0	0	0	0	0	0	0	0	0	0	0	0
Firmicutes;Erysipelotrichia;Erysipelotrichales;Erysipelotrichaceae;Erysipelothrix;Erysipelothrix rhusiopathiae	0	0	0	0	0	0	0	0	0	0	0	0	0	0	0	0	0	0	0	0	0	0	0	0	0	0	0	0	0	0	0	0	0	0	0	0	0	0	0	0	0	0	0	0	0	0	0	0	0
Firmicutes;Erysipelotrichia;Erysipelotrichales;Erysipelotrichaceae;Erysipelothrix;uncultured bacterium	0	0	0	0	0	0	0	0	0	0	0	0	0	0	0	0	0	0	0	0	0	0.0203046	0	0	0	0	0	0	0	0	0	0	0	0.0098934	0	0	0	0.00639771	0	0	0	0	0	0	0	0	0	0	0
Firmicutes;Erysipelotrichia;Erysipelotrichales;Erysipelotrichaceae;Erysipelotrichaceae UCG-004;uncultured bacterium	0	0	0	0	0	0	0	0	0	0	0.299951	0.0667186	0.00800176	0.0401553	0	0	0	0	0	0	0	0	0	0	0	0	0	0	0	0	0	0	0	0	0	0	0	0	0	0	0	0	0	0	0	0	0	0	0
Firmicutes;Erysipelotrichia;Erysipelotrichales;Erysipelotrichaceae;Erysipelotrichaceae UCG-009;Ambiguous_taxa	0	0	0	0	0	0	0	0	0	0.00639828	0	0	0	0	0	0	0	0	0	0	0	0	0	0	0	0	0	0	0	0	0	0	0	0	0	0	0	0	0	0	0	0	0	0	0	0	0	0	0.0131035
Firmicutes;Erysipelotrichia;Erysipelotrichales;Erysipelotrichaceae;Solobacterium;uncultured bacterium	0	0	0	0	0	0	0	0	0	0	0	0	0	0	0	0	0	0	0.0330415	0	0	0	0	0	0	0	0	0	0	0	0	0	0	0	0	0.0261305	0	0	0.0432072	0	0	0	0	0	0	0.00993197	0	0	0.0540518
Firmicutes;Erysipelotrichia;Erysipelotrichales;Erysipelotrichaceae;Turicibacter;Ambiguous_taxa	0	0	0	0	0	0	0	0	0	0	0	0	0	0	0	0	0	0	0	0	0	0	0	0	0	0	0	0	0	0	0	0	0	0	0	0	0	0	0	0	0	0	0	0	0	0	0	0	0
Firmicutes;Erysipelotrichia;Erysipelotrichales;Erysipelotrichaceae;uncultured;uncultured bacterium	0	0	0	0	0	0	0	0	0	0.325033	0.689439	0.166796	0.158035	0.160621	0	0	0.0146956	0.0288653	0.0306814	0.0219632	0.0814863	0.0490694	0	0.0362985	0.137573	0.0470149	0.131212	0.00843372	0	0.0319654	0.057631	0	0	0.0766738	0	0	0	0	0	0	0	0	0	0	0	0	0	0	0.0147414
Firmicutes;Erysipelotrichia;Erysipelotrichales;Erysipelotrichaceae;__;__	0	0	0	0	0	0	0	0	0	0	0	0	0	0	0	0	0	0.00633629	0	0.0219632	0.0395791	0.0253807	0	0.0112651	0.123661	0.0394319	0	0.011245	0.0129298	0.0491775	0.0305105	0	0	0	0.0538317	0	0.0205281	0	0.0617246	0	0	0	0	0.00892631	0	0	0	0	0
Firmicutes;Negativicutes;Selenomonadales;Acidaminococcaceae;Acidaminococcus;uncultured bacterium	0	0	0	0	0	0	0	0	0	0	0	0	0	0	0	0	0	0	0	0	0	0	0	0	0	0	0	0	0	0	0	0	0.0346555	0.168188	0.0938604	0.0696812	0	0.0678157	0.0246898	0.0315856	0	0	0	0	0	0	0	0	0
Firmicutes;Negativicutes;Selenomonadales;Acidaminococcaceae;Phascolarctobacterium;uncultured bacterium	0	0	0	0	0	0	0	0	0	0	0	0	0	0	0	0	0	0	0	0	0	0	0	0	0	0	0	0	0	0	0	0	0	0	0	0	0	0	0	0	0	0	0	0	0	0.00567541	0	0	0
Firmicutes;Negativicutes;Selenomonadales;Acidaminococcaceae;Phascolarctobacterium;__	0	0	0	0	0	0	0	0	0	0	0	0	0	0	0	0	0	0	0	0	0	0	0	0	0	0	0	0	0	0	0	0	0	0	0	0	0	0	0	0	0	0	0	0	0	0	0	0	0
Firmicutes;Negativicutes;Selenomonadales;Acidaminococcaceae;uncultured;uncultured bacterium	0.133008	0.00353051	0	0.0710412	0.027499	0	0	0	0.0231119	0.0319914	0.0462611	0.047815	0.176039	0.0485209	0	0	0.260847	0.172488	0.0991244	0.179824	0.0838145	0.115059	0	0.0312919	0.253505	0.272232	0.398212	0.00562248	0.0219806	0.127862	0.240694	0.0495773	0.0409565	0.0247335	0	0	0	0.0153545	0.040121	0	0.00685178	0	0	0.00446316	0	0	0.0144592	0	0.0401294
Firmicutes;Negativicutes;Selenomonadales;Acidaminococcaceae;__;__	0	0	0	0	0	0	0	0	0	0	0	0	0	0	0	0	0	0	0	0	0	0	0	0	0	0	0	0	0	0	0	0.0101697	0	0	0	0	0	0	0	0	0	0	0	0	0	0	0	0	0
Firmicutes;Negativicutes;Selenomonadales;Veillonellaceae;Allisonella;Ambiguous_taxa	0	0	0	0	0	0	0	0	0	0	0	0	0	0	0	0	0	0	0	0	0	0	0	0	0	0	0	0	0	0	0	0	0	0	0	0	0	0	0	0	0	0	0	0	0	0	0	0	0
Firmicutes;Negativicutes;Selenomonadales;Veillonellaceae;Dialister;Ambiguous_taxa	0	0	0	0	0	0	0	0	0	0	0	0	0	0	0	0	0	0	0	0	0	0	0	0	0	0	0	0	0	0	0	0	0.06301	0	0.0469302	0.265037	0.0242605	0	0.00925869	0.0868604	0	0.015586	0	0	0	0.0156074	0	0	0
Firmicutes;Negativicutes;Selenomonadales;Veillonellaceae;Dialister;__	0	0	0	0	0	0	0	0	0	0	0	0	0	0.0819837	0	0	0	0	0	0	0	0.0152284	0	0.00375502	0	0	0	0	0	0	0	0	0	0	0	0	0	0	0	0	0	0	0	0	0	0	0	0	0
Firmicutes;Negativicutes;Selenomonadales;Veillonellaceae;Megasphaera;Ambiguous_taxa	0	0	0	0	0	0	0	0	0	0	0.025369	0.00889581	0.108024	0.137197	0	0	0	0	0	0.0109816	0	0	0	0.0212785	0	0.00303322	0	0	0	0	0	0	0	0	0.0055212	0	0	0	0	0	0	0	0	0	0	0	0	0	0.049138
Firmicutes;Negativicutes;Selenomonadales;Veillonellaceae;Megasphaera;uncultured bacterium	0	0	0	0.00473608	0	0	0	0	0	0	0	0	0	0	0	0	0	0	0	0	0	0	0	0	0	0	0	0	0	0	0.00791014	0	0.075612	0	0	0	0	0	0	0	0	0	0	0	0	0	0	0	0
Firmicutes;Negativicutes;Selenomonadales;Veillonellaceae;Megasphaera;__	0	0	0	0	0	0	0	0	0	0	0	0	0	0	0	0	0	0	0.0188808	0.00960892	0	0.037225	0	0.0150201	0.00927457	0.00530814	0.02136	0	0	0	0.0327706	0	0.25519	0.158294	0.114565	0.262549	0	0.179136	0.080242	0.144767	0.159304	0.00519534	0	0.193403	0.0877533	0.0028377	0	0	0.0524139
Firmicutes;Negativicutes;Selenomonadales;Veillonellaceae;Mitsuokella;uncultured bacterium	0	0	0	0	0	0	0	0	0	0	0	0	0	0	0	0	0	0	0	0	0	0	0	0	0	0	0	0	0	0	0	0	0	0	0	0.00746584	0	0	0	0	0	0	0	0	0	0.0127697	0	0	0.0024569
Firmicutes;Negativicutes;Selenomonadales;Veillonellaceae;Mitsuokella;__	0	0	0	0	0	0	0	0	0	0	0	0	0	0	0	0	0	0	0	0	0	0	0	0	0	0	0	0	0	0	0	0	0	0	0	0	0	0	0.0216036	0	0	0	0	0.0208281	0	0	0	0	0
Firmicutes;Negativicutes;Selenomonadales;Veillonellaceae;Pectinatus;Pectinatus cerevisiiphilus	0	0	0	0	0	0	0	0	0	0.040949	0	0	0	0	0	0	0	0	0	0	0	0	0	0	0	0	0	0	0	0	0	0	0	0	0	0	0	0	0	0	0	0	0	0	0	0	0	0	0
Firmicutes;Negativicutes;Selenomonadales;Veillonellaceae;Selenomonas;Selenomonas sp. enrichment culture clone hao17	0	0	0	0	0	0	0	0	0	0	0	0	0	0	0	0	0	0	0	0	0	0	0	0	0	0	0	0	0	0	0.0113002	0	0	0	0	0	0	0	0	0	0	0	0	0	0	0	0	0	0
Firmicutes;Negativicutes;Selenomonadales;Veillonellaceae;Thermosinus;Ambiguous_taxa	0	0	0	0	0	0	0	0	0	0	0	0	0	0	0	0	0	0	0	0	0	0	0	0	0	0	0	0	0	0	0	0	0	0	0	0	0	0	0	0	0	0	0	0	0	0	0	0	0
Firmicutes;Negativicutes;Selenomonadales;Veillonellaceae;Thermosinus;__	0	0	0	0	0	0	0	0	0	0	0	0	0	0	0	0	0	0	0	0	0	0	0	0	0	0	0	0	0	0	0	0	0	0	0	0.00497723	0	0	0	0	0	0	0	0	0	0	0	0	0
Firmicutes;Negativicutes;Selenomonadales;Veillonellaceae;Veillonella;Ambiguous_taxa	0	0	0	0	0	0	0	0	0	0	0	0	0	0	0	0	0	0	0	0	0	0.0219966	0	0.00751004	0	0	0	0	0	0	0	0	0	0	0	0	0	0	0	0	0	0	0	0.0119018	0	0	0	0	0.102371
Firmicutes;Negativicutes;Selenomonadales;Veillonellaceae;Veillonella;__	0	0	0	0	0	0	0	0	0	0.0179152	0	0	0	0	0	0	0	0	0	0	0	0	0	0	0	0	0	0	0	0	0	0	0	0	0	0.0174203	0	0	0	0.039482	0	0	0	0	0	0	0	0	0.0122845
Firmicutes;Negativicutes;Selenomonadales;Veillonellaceae;Zymophilus;Propionispira paucivorans	0	0	0	0	0	0	0	0	0	0	0	0	0	0	0	0	0	0	0	0	0	0	0	0	0	0	0	0	0	0	0	0	0	0	0	0	0	0	0	0	0	0	0	0	0	0	0	0	0
Firmicutes;Negativicutes;Selenomonadales;Veillonellaceae;__;__	0	0	0	0	0	0	0	0	0	0	0	0	0	0	0	0	0	0	0	0	0	0	0	0	0	0	0	0	0	0	0	0	0	0	0	0	0	0	0	0	0	0	0	0	0	0	0	0	0
Firmicutes;__;__;__;__;__	0	0	0	0	0	0	0	0	0	0	0	0	0	0	0	0	0	0	0	0	0.00232818	0.0135364	0	0.00375502	0	0.017441	0	0	0	0	0.0214704	0	0	0	0	0	0	0	0	0	0	0	0	0	0	0	0	0	0
Fusobacteria;Fusobacteriia;Fusobacteriales;Fusobacteriaceae;Cetobacterium;Ambiguous_taxa	0	0	0	0	0	0	0	0	0	0	0	0	0	0	0	0	0	0.168264	0	0	0	0	0	0	0.0417356	0.00606644	0.0610286	0.0133534	0.0452541	0.059013	0.0214704	0	0	0	0	0	0	0	0	0	0	0	0	0	0	0	0	0	0
Fusobacteria;Fusobacteriia;Fusobacteriales;Fusobacteriaceae;Cetobacterium;uncultured bacterium	0.74928	0.0714929	0.13368	1.39714	0.97163	0	0	0.956092	0.316456	1.56502	1.69972	1.73691	0.620136	1.15112	0	0	2.85279	2.20292	0.844918	1.29995	1.10472	1.20474	0	0.474384	2.34647	2.68743	2.60745	0.198895	0.369791	0.769628	1.86905	1.62842	0.176428	0.148401	0.191862	0.265037	0.0410563	0.209845	0.0277761	0.115814	0.0445366	0	0	0.182989	0.0387147	0.038309	0.0585979	0	0.248147
Fusobacteria;Fusobacteriia;Fusobacteriales;Fusobacteriaceae;Cetobacterium;__	0	0	0	0	0	0	0	0	0	0	0	0	0	0	0	0	0	0.0359056	0	0	0.0139691	0	0	0	0	0	0	0	0	0	0	0	0.037806	0	0	0	0	0	0	0	0	0	0	0	0	0	0	0	0
Fusobacteria;Fusobacteriia;Fusobacteriales;Fusobacteriaceae;Fusobacterium;Fusobacterium necrogenes	0	0	0	0.101826	0	0	0	0	0	0.0473473	0.173106	0.230179	0.0120026	0.098715	0	0	1.2179	1.43834	0.429539	0.958146	1.12451	0.450085	0	0.544478	1.94302	1.8988	1.93918	0.314156	0.66071	2.42199	1.73571	1.12121	0	0	0	0	0	0.0383862	0	0	0	0	0	0.0401684	0	0.00567541	0	0	0
Fusobacteria;Fusobacteriia;Fusobacteriales;Fusobacteriaceae;Fusobacterium;gut metagenome	0	0	0	0	0	0	0	0	0	0	0	0	0	0	0	0	0.137771	0.539289	0.0542824	0.189433	0.240967	0.142132	0	0.110147	0.327702	0.399627	0.665212	0.0569276	0.134469	0.366372	0.379687	0.343228	0	0	0.0069015	0	0	0	0	0	0	0	0	0.0342175	0	0	0	0	0.00737071
Fusobacteria;Fusobacteriia;Fusobacteriales;Fusobacteriaceae;Fusobacterium;__	0.518732	0.135925	0.688147	2.1265	3.86361	0	0	1.67643	1.32627	3.30535	3.28454	4.29223	2.13647	2.95643	0	0	3.6188	3.88485	1.07857	1.96022	2.28744	1.37225	0	0.983816	3.49033	3.6156	3.81582	0.40763	0.74734	1.95726	2.72109	2.07716	0.144923	0.215181	0.251215	0.274992	0.0447887	0.300692	0.108018	0.276374	0.0479625	0.015586	0	0.196379	0.0516196	0.0156074	0.0509878	0	0.746898
Fusobacteria;Fusobacteriia;Fusobacteriales;Fusobacteriaceae;Ilyobacter;Ambiguous_taxa	0	0	0	0	0	0	0	0	0	0	0	0	0	0	0	0	0	0	0	0.0247086	0	0	0	0	0	0.017441	0	0	0	0	0.0192103	0	0	0	0	0	0	0	0	0	0	0	0	0	0	0	0	0	0
Fusobacteria;Fusobacteriia;Fusobacteriales;Fusobacteriaceae;Propionigenium;__	0	0	0	0	0	0	0	0	0	0	0	0	0	0	0	0	0	0	0	0	0	0	0	0	0	0	0	0	0	0	0	0	0	0	0	0	0	0	0	0	0	0	0	0	0	0	0	0	0
Fusobacteria;Fusobacteriia;Fusobacteriales;Fusobacteriaceae;Psychrilyobacter;Ambiguous_taxa	0.0554201	0	0.429902	0.0816974	0	0	0	0.242297	0	0.628311	0.376058	0.712777	0.330073	0.604002	0	0	0.314119	0.673055	0.306814	0.321212	0.502887	0.34687	0	0.152704	0.564203	0.956981	0.640801	0.0386545	0.15645	0.533576	0.503989	0.46145	0	0.0643071	0	0.0883458	0	0	0	0.039482	0	0	0	0.0848	0	0	0.0197863	0	0.214569
Fusobacteria;Fusobacteriia;Fusobacteriales;Fusobacteriaceae;Psychrilyobacter;uncultured bacterium	0	0	0.220268	0.390727	0	0	0	0.203006	0.108448	0.0678218	0.0955067	0.0300234	0	0	0	0	0.213086	0.507607	0.139246	0.222378	0.28171	0.179357	0	0.0963789	0.148393	0.589203	0.358543	0.0463854	0.133176	0.312277	0.280245	0.232632	0	0	0.106283	0	0	0	0	0.142135	0	0	0	0	0	0	0	0	0
Fusobacteria;Fusobacteriia;Fusobacteriales;Fusobacteriaceae;Psychrilyobacter;__	1.79118	0.246253	0.83246	2.93163	1.98451	0	0	3.66065	0.892476	2.18821	1.11922	0.99633	0.202044	1.42217	0	0	3.25692	3.14209	1.99193	2.37752	2.25601	1.55499	0	1.31301	3.4826	4.1267	4.03094	0.508132	0.955509	2.92852	3.26915	2.27293	0.352856	0.53919	0.218087	0.477814	0.199683	0.388981	0.567866	0.268478	0.407681	0.039831	0.01124	0.255888	0	0.00709426	0.10502	0	0.359527
Fusobacteria;Fusobacteriia;Fusobacteriales;Fusobacteriaceae;__;__	0	0	0	0	0	0	0	0	0	0	0	0	0	0	0	0	0	0	0	0	0	0	0	0	0	0	0	0	0	0	0	0	0	0	0	0	0	0	0	0	0	0	0	0	0	0	0	0.00407598	0
Fusobacteria;Fusobacteriia;Fusobacteriales;Leptotrichiaceae;Hypnocyclicus;__	0	0	0	0	0	0	0	0	0	0	0	0	0	0	0	0	0	0	0	0	0	0	0	0	0	0.00834136	0.0152572	0	0	0	0	0	0	0	0	0	0	0	0	0	0	0	0	0	0	0	0	0	0
Gemmatimonadetes;BD2-11 terrestrial group;Ambiguous_taxa;Ambiguous_taxa;Ambiguous_taxa;Ambiguous_taxa	0	0	0	0	0	0	0	0	0	0	0	0	0	0	0	0	0	0	0	0	0	0	0	0	0	0	0	0	0	0	0	0	0	0	0	0	0	0	0	0	0	0	0	0	0	0	0	0	0
Gemmatimonadetes;Gemmatimonadetes;Gemmatimonadales;Gemmatimonadaceae;Gemmatimonas;Gemmatimonas phototrophica	0	0	0	0	0	0	0	0	0	0	0	0.155677	0	0	0	0	0	0	0	0	0	0	0	0	0	0	0	0	0	0	0	0	0	0	0	0	0	0	0	0	0	0	0	0	0	0	0	0	0
Gemmatimonadetes;Gemmatimonadetes;Gemmatimonadales;Gemmatimonadaceae;Gemmatimonas;uncultured bacterium	0	0	0.00911452	0	0	0	0	0.104777	0	0	0	0	0	0	0	0	0	0	0	0	0	0	0	0	0	0	0	0	0	0.00491775	0	0	0	0	0	0	0	0	0	0	0.0154165	0	0	0	0	0	0	0	0
Gemmatimonadetes;Gemmatimonadetes;Gemmatimonadales;Gemmatimonadaceae;uncultured;uncultured Gemmatimonadetes bacterium	0	0	0	0	0	0	0	0	0.0124449	0	0	0	0	0	0	0	0	0	0	0	0	0	0	0	0.0108203	0	0	0	0	0	0	0	0	0	0	0	0	0	0	0	0	0	0	0	0	0	0	0	0
Gemmatimonadetes;Gemmatimonadetes;Gemmatimonadales;Gemmatimonadaceae;uncultured;uncultured bacterium	0	0	0	0	0	0	0	0	0	0	0	0	0	0	0	0	0	0	0	0	0	0	0	0	0	0	0	0	0	0	0	0	0	0	0	0	0	0	0	0	0	0	0	0	0	0	0	0	0
Gemmatimonadetes;Gemmatimonadetes;Gemmatimonadales;Gemmatimonadaceae;uncultured;__	0	0	0	0	0	0	0	0	0	0	0.0343227	0	0	0	0	0	0	0	0	0	0	0	0	0	0	0	0	0	0	0	0	0	0	0	0	0	0	0	0	0	0	0	0	0	0	0	0	0	0
Hydrogenedentes;Hydrogenedentia;Hydrogenedentiales;Hydrogenedensaceae;uncultured bacterium;uncultured bacterium	0	0	0	0	0	0	0	0.0261943	0	0	0	0	0	0	0	0	0.0661303	0	0	0	0	0	0	0	0	0	0	0	0	0	0	0	0	0	0.0041409	0	0	0	0	0	0	0	0	0	0	0	0	0	0
Margulisbacteria;uncultured bacterium;uncultured bacterium;uncultured bacterium;uncultured bacterium;uncultured bacterium	0	0	0	0	0	0	0	0	0	0	0	0	0	0	0	0	0	0	0	0	0	0	0	0	0	0	0	0	0	0	0	0	0	0	0	0	0	0	0	0	0	0	0	0	0	0	0	0	0
Marinimicrobia (SAR406 clade);Ambiguous_taxa;Ambiguous_taxa;Ambiguous_taxa;Ambiguous_taxa;Ambiguous_taxa	0	0	0	0	0	0	0	0	0	0	0	0	0	0	0	0	0	0	0	0	0	0	0	0	0	0	0	0	0	0	0	0	0	0	0	0.0261305	0	0.014075	0	0	0	0	0	0	0	0	0	0	0
Marinimicrobia (SAR406 clade);uncultured bacterium;uncultured bacterium;uncultured bacterium;uncultured bacterium;uncultured bacterium	0	0	0	0	0	0	0	0	0	0	0	0	0	0	0	0	0	0	0	0	0	0	0	0	0	0	0	0	0	0	0	0	0	0	0	0.032352	0	0.0511817	0	0	0	0	0	0	0	0.0127697	0	0	0
Marinimicrobia (SAR406 clade);uncultured eubacterium OCS146;uncultured eubacterium OCS146;uncultured eubacterium OCS146;uncultured eubacterium OCS146;uncultured eubacterium OCS146	0	0	0	0	0	0	0	0	0	0	0	0	0	0	0	0	0	0	0	0	0	0	0	0	0	0	0	0	0	0	0	0	0	0	0	0	0	0	0	0	0	0	0	0	0	0	0	0	0
Marinimicrobia (SAR406 clade);uncultured marine bacterium;uncultured marine bacterium;uncultured marine bacterium;uncultured marine bacterium;uncultured marine bacterium	0	0	0	0	0	0	0	0	0	0	0	0	0	0	0	0	0	0	0	0	0	0	0	0	0	0	0	0	0	0	0	0	0	0	0	0.0124431	0	0	0.0246898	0	0	0	0.00408726	0	0	0.00354713	0	0	0
Marinimicrobia (SAR406 clade);__;__;__;__;__	0	0	0	0	0	0	0	0	0	0	0	0	0	0	0	0	0	0	0	0	0	0	0	0	0	0	0	0	0	0	0	0	0	0	0	0	0	0	0	0	0	0	0	0	0	0	0	0	0
Nitrospinae;Nitrospinia;Nitrospinales;Nitrospinaceae;LS-NOB;Ambiguous_taxa	0	0	0	0	0	0	0	0	0	0	0	0	0	0	0	0	0	0	0	0	0	0	0	0	0	0	0	0	0	0	0	0	0	0	0	0	0	0	0	0	0	0	0	0	0	0	0	0	0
Nitrospirae;Nitrospira;Nitrospirales;Nitrospiraceae;Nitrospira;Ambiguous_taxa	0	0	0	0	0	0	0	0	0	0	0	0	0	0	0	0	0	0	0	0	0	0	0	0	0	0	0	0	0	0	0	0	0	0	0	0	0	0	0	0.0131607	0	0	0	0	0	0	0	0	0
Omnitrophicaeota;Omnitrophia;Omnitrophales;Omnitrophaceae;Candidatus Omnitrophus;bioreactor metagenome	0	0	0	0	0	0	0	0	0	0.0204745	0	0	0	0.150582	0	0	0	0	0	0	0	0	0	0	0	0	0	0	0	0	0	0	0	0	0	0	0	0	0	0	0	0	0	0	0	0	0	0	0
Patescibacteria;ABY1;Candidatus Kerfeldbacteria;uncultured bacterium;uncultured bacterium;uncultured bacterium	0	0	0	0	0	0	0	0.0327429	0	0	0	0	0	0	0	0	0	0	0	0	0	0	0	0	0	0	0	0	0	0	0	0	0	0	0	0	0	0	0	0.0210571	0.0137036	0	0	0	0	0	0	0	0
Patescibacteria;ABY1;Candidatus Magasanikbacteria;uncultured bacterium;uncultured bacterium;uncultured bacterium	0	0	0	0	0	0	0	0	0	0	0	0	0	0	0	0	0	0	0	0	0	0	0	0	0	0	0	0	0	0	0	0	0	0	0	0	0	0	0	0	0	0	0	0	0	0	0	0	0
Patescibacteria;ABY1;Candidatus Magasanikbacteria;__;__;__	0	0	0	0	0	0	0	0	0	0	0	0	0	0	0	0	0	0	0	0	0	0	0	0	0	0	0	0	0	0	0	0	0	0	0	0	0	0	0	0	0	0	0	0	0	0	0	0	0
Patescibacteria;ABY1;Candidatus Uhrbacteria;Candidatus Uhrbacteria bacterium GW2011_GWA2_53_10;Candidatus Uhrbacteria bacterium GW2011_GWA2_53_10;Candidatus Uhrbacteria bacterium GW2011_GWA2_53_10	0	0	0	0	0	0	0	0	0	0	0	0	0	0	0	0	0	0	0	0	0	0	0	0	0	0	0	0	0	0	0	0	0	0	0.0331272	0	0	0	0	0	0	0	0	0	0	0	0.00304405	0	0
Patescibacteria;ABY1;__;__;__;__	0	0	0	0	0	0	0	0	0	0	0	0	0	0	0	0	0	0	0	0	0	0	0	0	0	0	0	0	0	0	0	0	0	0	0	0	0	0	0	0	0	0	0	0	0	0	0	0	0
Patescibacteria;Berkelbacteria;uncultured soil bacterium;uncultured soil bacterium;uncultured soil bacterium;uncultured soil bacterium	0	0	0	0	0	0	0	0	0	0	0.0387996	0	0	0	0	0	0	0	0	0	0	0	0	0	0	0	0	0	0	0	0	0	0	0	0	0	0	0	0	0	0	0	0	0.00595088	0	0	0	0	0
Patescibacteria;Gracilibacteria;Ambiguous_taxa;Ambiguous_taxa;Ambiguous_taxa;Ambiguous_taxa	0.0133008	0	0	0	0	0	0	0.00654857	0	0	0	0	0	0	0	0	0.036739	0.00563226	0	0.0123543	0	0	0	0	0.00618305	0	0	0	0	0	0	0	0	0	0	0.0149317	0	0	0	0	0.00513883	0	0	0	0	0	0	0	0
Patescibacteria;Gracilibacteria;Absconditabacteriales (SR1);Ambiguous_taxa;Ambiguous_taxa;Ambiguous_taxa	0.195079	0	0	0.0059201	0	0	0	0	0	0.0460676	0.0596917	0	0.220048	0	0	0	0	0.0506903	0.0188808	0	0.00814863	0.0186125	0	0	0.0386441	0	0	0	0.0051719	0	0	0	0.0346555	0	0	0	0	0	0	0	0	0	0	0.00892631	0.0180668	0	0	0	0
Patescibacteria;Gracilibacteria;Candidatus Peribacteria;Candidatus Peribacteria bacterium GW2011_GWC2_54_8;Candidatus Peribacteria bacterium GW2011_GWC2_54_8;Candidatus Peribacteria bacterium GW2011_GWC2_54_8	0.0532033	0	0	0	0	0	0	0	0	0	0	0	0	0	0	0	0	0.066179	0.0637228	0	0	0	0	0	0	0	0	0.0379517	0	0	0	0.0216106	0	0	0.0165636	0	0	0	0	0	0	0	0	0	0.183249	0	0	0	0
Patescibacteria;Gracilibacteria;Candidatus Peribacteria;uncultured bacterium;uncultured bacterium;uncultured bacterium	0.279317	0.0291267	0.154947	0.121954	0.123745	0	0	0.219377	0.599132	0.00511862	0.210413	0.0422551	0	0.0585598	0	0.00154383	0.143282	0.126726	0.106205	0.0247086	0.0605327	0	0	0.0112651	0.0664678	0.0326071	0.091543	0.0414658	0	0	0	0.0216106	0.201632	0.0173134	0.0924801	0.0111988	0	0.0754929	0.0617246	0.152664	0.00342589	0	0	0	0	0	0	0	0.0982761
Patescibacteria;Gracilibacteria;Candidatus Peribacteria;__;__;__	0	0	0	0	0.902883	0	0	0	0	0	0	0	0	0	0	0	0	0	0	0	0	0	0	0	0	0	0	0	0	0	0	0	0	0	0.0110424	0	0	0	0	0.126342	0	0	0	0	0	0	0.0121762	0	0
Patescibacteria;Gracilibacteria;JGI 0000069-P22;uncultured Epsilonproteobacteria bacterium;uncultured Epsilonproteobacteria bacterium;uncultured Epsilonproteobacteria bacterium	0	0	0	0	0	0	0	0	0	0	0	0	0	0	0	0	0	0	0	0	0	0	0	0	0	0	0	0	0	0	0	0	0	0	0	0	0	0	0	0	0	0	0	0	0	0	0	0	0
Patescibacteria;Gracilibacteria;__;__;__;__	0	0	0	0	0	0	0	0	0	0	0	0	0	0	0	0	0	0	0	0	0	0	0	0	0	0	0	0	0	0	0	0	0	0	0	0	0	0	0	0	0	0	0	0	0	0	0	0	0
Patescibacteria;Microgenomatia;Candidatus Amesbacteria;Microgenomates bacterium SCGC AAA011-B20;Microgenomates bacterium SCGC AAA011-B20;Microgenomates bacterium SCGC AAA011-B20	0	0	0	0	0	0	0	0	0	0	0	0	0.018004	0	0	0	0	0	0	0.013727	0	0	0	0	0	0	0	0	0	0	0	0	0	0	0	0	0	0	0	0	0	0	0	0	0	0	0	0	0
Patescibacteria;Microgenomatia;Candidatus Amesbacteria;__;__;__	0	0	0	0	0	0	0	0	0	0	0	0	0	0	0	0	0	0	0	0	0	0	0	0	0	0	0	0	0	0	0	0	0	0	0	0	0	0	0	0	0	0	0	0	0	0	0	0	0
Patescibacteria;Microgenomatia;Candidatus Daviesbacteria;uncultured soil bacterium;uncultured soil bacterium;uncultured soil bacterium	0	0	0	0	0	0	0	0	0	0	0	0	0	0	0	0	0	0	0	0	0	0	0	0	0	0	0	0	0	0	0	0	0	0.0618337	0	0	0	0	0	0	0	0	0	0	0	0	0	0	0
Patescibacteria;Microgenomatia;Candidatus Pacebacteria;uncultured bacterium;uncultured bacterium;uncultured bacterium	0.21503	0	0	0	0	0	0	0	0	0	0	0	0	0	0	0	0	0	0	0	0	0	0	0	0.032461	0	0	0	0	0	0	0.0711879	0	0	0	0	0	0	0	0	0	0	0	0	0	0	0	0	0
Patescibacteria;Microgenomatia;Candidatus Roizmanbacteria;uncultured bacterium;uncultured bacterium;uncultured bacterium	0	0	0	0	0.256657	0	0	0	0	0	0	0	0	0	0	0	0	0	0	0	0	0	0	0	0	0	0	0	0	0	0	0	0	0	0	0	0	0	0	0	0	0	0	0	0	0	0	0	0
Patescibacteria;Parcubacteria;Candidatus Campbellbacteria;metagenome;metagenome;metagenome	0	0	0	0	0	0	0	0	0	0	0	0	0	0	0	0	0	0	0	0	0	0	0	0	0	0	0	0	0	0	0	0	0	0	0	0	0	0	0	0	0	0	0	0	0	0	0	0	0
Patescibacteria;Parcubacteria;Candidatus Campbellbacteria;uncultured bacterium;uncultured bacterium;uncultured bacterium	0	0	0	0	0	0	0	0	0	0	0	0	0	0	0	0	0	0	0	0	0	0	0	0	0	0	0	0	0	0	0	0	0	0	0	0	0	0	0	0	0	0	0	0	0	0	0	0	0
Patescibacteria;Parcubacteria;Candidatus Kaiserbacteria;Ambiguous_taxa;Ambiguous_taxa;Ambiguous_taxa	0	0	0	0.0343366	0.00916632	0	0	0	0.0942256	0	0	0.00778383	0.0380084	0	0	0	0.0165326	0	0	0.0452992	0	0.0135364	0	0	0	0.00151661	0	0	0	0.0221299	0	0.00635607	0	0.0098934	0	0.00497723	0.0111972	0	0	0	0	0.0103907	0	0	0.0154859	0.00425656	0.00304405	0	0
Patescibacteria;Parcubacteria;Candidatus Kaiserbacteria;groundwater metagenome;groundwater metagenome;groundwater metagenome	0	0	0	0	0	0	0	0	0	0	0	0	0	0	0	0	0	0	0	0	0	0	0	0	0	0	0	0	0	0	0	0	0	0	0	0	0	0	0	0	0	0	0	0	0	0	0	0	0
Patescibacteria;Parcubacteria;Candidatus Kaiserbacteria;metagenome;metagenome;metagenome	0	0	0	0.0106562	0	0	0	0	0	0	0	0	0	0	0	0	0	0	0	0	0	0	0	0	0	0	0	0	0	0	0	0	0	0	0	0	0	0	0	0	0	0	0	0	0	0	0	0	0
Patescibacteria;Parcubacteria;Candidatus Kaiserbacteria;uncultured bacterium;uncultured bacterium;uncultured bacterium	0	0	0	0	0	0	0	0	0	0	0	0	0	0	0	0	0	0	0	0	0	0	0	0	0	0	0	0	0	0	0	0.00381364	0	0	0	0	0	0	0	0	0	0	0	0	0	0	0	0	0
Patescibacteria;Parcubacteria;Candidatus Kaiserbacteria;__;__;__	0.0310352	0.0291267	0	0	0	0	0	0	0.0515574	0	0	0	0	0.0217508	0	0	0	0	0	0	0	0	0	0	0.0123661	0	0	0	0	0	0.00226004	0	0	0	0	0	0	0	0	0	0	0.0329039	0	0	0	0	0	0	0.0049138
Patescibacteria;Parcubacteria;Candidatus Moranbacteria;uncultured bacterium;uncultured bacterium;uncultured bacterium	0	0	0	0	0	0	0	0	0	0	0	0	0	0	0	0	0.0991954	0	0	0	0	0	0	0	0	0	0	0	0	0	0	0	0	0	0	0	0	0	0.0216036	0	0.0188424	0	0	0	0	0	0	0	0.0343966
Patescibacteria;Parcubacteria;Candidatus Nomurabacteria;Candidatus Nomurabacteria bacterium RIFCSPHIGHO2_02_FULL_38_15;Candidatus Nomurabacteria bacterium RIFCSPHIGHO2_02_FULL_38_15;Candidatus Nomurabacteria bacterium RIFCSPHIGHO2_02_FULL_38_15	0	0	0	0.0307845	0	0	0	0	0	0	0	0	0	0	0	0	0	0	0	0	0	0	0	0	0.00463729	0	0	0	0	0	0	0	0	0	0	0	0	0	0	0	0	0	0	0	0	0	0	0	0
Patescibacteria;Parcubacteria;Candidatus Nomurabacteria;Parcubacteria bacterium RAAC4_OD1_1;Parcubacteria bacterium RAAC4_OD1_1;Parcubacteria bacterium RAAC4_OD1_1	0	0	0	0	0	0	0	0	0	0	0	0	0	0	0	0	0	0	0	0	0	0	0	0	0	0	0	0	0	0	0	0	0	0	0	0	0	0	0	0	0	0	0	0	0	0	0	0	0
Patescibacteria;Parcubacteria;Candidatus Nomurabacteria;uncultured Latescibacteria bacterium;uncultured Latescibacteria bacterium;uncultured Latescibacteria bacterium	0	0	0	0	0	0	0	0	0	0	0	0	0	0	0	0	0	0	0	0	0	0	0	0	0	0	0	0	0	0	0	0	0	0	0	0	0	0	0	0	0	0	0	0	0	0	0	0	0
Patescibacteria;Parcubacteria;Candidatus Nomurabacteria;uncultured Parcubacteria group bacterium;uncultured Parcubacteria group bacterium;uncultured Parcubacteria group bacterium	0	0	0	0	0	0	0	0	0	0	0	0	0	0	0	0	0	0	0	0	0	0	0	0	0	0	0	0	0	0	0	0	0	0	0	0	0	0	0	0	0	0	0	0	0	0	0	0	0
Patescibacteria;Parcubacteria;Candidatus Nomurabacteria;uncultured bacterium;uncultured bacterium;uncultured bacterium	0	0	0.00303817	0	0	0	0	0.00654857	0.232897	0	0	0	0	0	0	0	0	0	0	0	0.00582045	0	0	0	0	0.00530814	0	0	0	0	0	0	0.0094515	0	0	0.00871015	0	0.0345476	0	0.0131607	0	0.00519534	0	0	0	0	0	0	0.0024569
Patescibacteria;Parcubacteria;Candidatus Nomurabacteria;wastewater metagenome;wastewater metagenome;wastewater metagenome	0	0	0	0.0438088	0	0	0	0	0	0	0	0	0	0	0	0	0	0	0	0	0	0	0	0.00375502	0	0	0	0	0	0	0	0	0	0	0	0	0	0	0	0	0	0	0	0	0	0	0	0	0
Patescibacteria;Parcubacteria;Candidatus Nomurabacteria;__;__;__	0	0	0	0.0106562	0	0	0	0	0	0	0	0	0	0	0	0	0.0036739	0	0	0	0	0	0	0	0.0293695	0	0	0	0	0	0	0	0	0	0.0345075	0	0	0	0	0.0131607	0.0342589	0	0	0	0.0103239	0	0	0	0
Patescibacteria;Parcubacteria;Candidatus Staskawiczbacteria;uncultured bacterium;uncultured bacterium;uncultured bacterium	0	0	0	0	0.0183326	0	0	0	0	0	0	0	0	0	0	0	0	0	0	0	0	0	0	0	0	0	0	0	0	0	0.00791014	0	0	0	0	0	0	0	0	0	0	0	0	0	0	0	0	0	0
Patescibacteria;Parcubacteria;Candidatus Vogelbacteria;uncultured bacterium;uncultured bacterium;uncultured bacterium	0	0	0	0	0	0	0	0	0.0746693	0	0	0	0	0	0	0	0	0	0	0	0	0	0	0	0	0	0	0	0	0	0	0	0	0	0	0	0	0.0153545	0	0	0	0	0	0	0	0	0	0	0
Patescibacteria;Parcubacteria;Candidatus Zambryskibacteria;Parcubacteria bacterium C7867-006;Parcubacteria bacterium C7867-006;Parcubacteria bacterium C7867-006	0	0	0	0.0544649	0	0	0	0	0	0	0	0	0	0	0	0	0	0	0	0	0	0	0	0	0	0	0	0	0	0	0	0	0	0.00742005	0	0	0	0	0	0	0	0	0	0	0	0	0	0	0
Patescibacteria;Parcubacteria;Candidatus Zambryskibacteria;metagenome;metagenome;metagenome	0	0	0	0	0	0	0	0	0	0	0	0	0	0	0	0	0	0	0	0	0	0	0	0	0	0.0386736	0	0	0.0051719	0	0	0	0	0	0	0	0	0	0	0	0	0	0	0	0	0.0156074	0	0	0
Patescibacteria;Parcubacteria;Candidatus Zambryskibacteria;__;__;__	0.0332521	0	0	0	0	0	0	0	0	0	0	0	0	0	0	0	0.00551086	0	0	0	0	0	0	0	0.00927457	0	0	0	0	0	0	0	0.050408	0	0	0.00248861	0	0	0	0.0368499	0	0	0	0	0	0	0.00228304	0	0.00163793
Patescibacteria;Parcubacteria;uncultured bacterium;uncultured bacterium;uncultured bacterium;uncultured bacterium	0	0	0	0	0	0	0	0.0163714	0	0	0.0298458	0	0	0	0	0	0	0	0	0.0301995	0	0	0	0	0	0	0	0	0	0	0.0101702	0	0	0	0	0	0	0	0	0	0	0	0	0.0342175	0	0.00354713	0	0	0.049957
Patescibacteria;Parcubacteria;__;__;__;__	0	0.00970891	0	0.0213124	0.499565	0	0	0	0.0871142	0	0	0	0	0	0	0	0.00551086	0.00422419	0	0.0109816	0	0	0	0.0100134	0	0	0	0	0	0	0	0	0	0	0	0	0.0242605	0.00767725	0.0154311	0	0	0	0	0	0	0	0	0	0.0892674
Patescibacteria;Saccharimonadia;Saccharimonadales;Ambiguous_taxa;Ambiguous_taxa;Ambiguous_taxa	0	0	0	0	0	0	0	0	0	0	0	0	0	0	0	0	0	0	0	0	0	0	0	0	0	0	0	0	0	0	0	0	0	0	0	0	0	0	0	0	0	0	0	0	0	0	0	0	0
Patescibacteria;Saccharimonadia;Saccharimonadales;Saccharimonadaceae;Candidatus Saccharimonas;Ambiguous_taxa	0	0	0	0	0	0	0	0	0	0	0	0	0	0	0	0	0	0	0	0	0	0	0	0	0	0	0	0	0	0	0	0	0	0	0	0	0	0	0	0	0	0	0	0	0	0	0	0	0
Patescibacteria;Saccharimonadia;Saccharimonadales;Saccharimonadaceae;uncultured bacterium;uncultured bacterium	0	0	0	0	0	0	0	0	0	0	0	0	0	0	0	0	0	0	0	0	0	0	0	0	0	0	0	0	0	0	0	0	0	0	0	0	0	0	0	0	0	0	0	0	0	0	0	0	0
Patescibacteria;Saccharimonadia;Saccharimonadales;metagenome;metagenome;metagenome	0	0	0	0	0.0229158	0	0	0	0	0.00895759	0	0	0	0	0	0	0	0	0.00472021	0	0	0	0	0	0.00463729	0	0	0	0	0.0098355	0	0.0317803	0.0409565	0	0	0	0	0	0	0	0	0.00865891	0.00613089	0	0	0	0	0	0.0466811
Patescibacteria;Saccharimonadia;Saccharimonadales;uncultured Candidatus Saccharibacteria bacterium;uncultured Candidatus Saccharibacteria bacterium;uncultured Candidatus Saccharibacteria bacterium	0	0	0	0	0	0	0	0	0	0	0	0	0	0	0	0	0	0	0	0	0	0	0	0	0	0	0	0	0	0	0	0	0	0	0	0	0	0	0	0	0	0	0	0	0	0	0.066969	0	0
Patescibacteria;Saccharimonadia;Saccharimonadales;uncultured bacterium;uncultured bacterium;uncultured bacterium	0	0.00529577	0	0	0	0	0	0.0392914	0	0	0	0	0	0.0217508	0	0	0	0.0330895	0	0	0.012805	0.0423012	0	0	0	0.034882	0	0	0	0	0.00678012	0.0127121	0	0	0	0.0298634	0	0	0.00925869	0	0	0	0	0	0	0.0120602	0	0	0.0131035
Patescibacteria;Saccharimonadia;Saccharimonadales;__;__;__	0	0	0	0	0	0	0	0	0	0	0	0	0	0	0	0	0	0	0	0	0	0	0	0	0	0	0	0	0	0	0	0	0	0	0	0	0	0	0	0	0	0	0	0	0	0	0	0	0
Planctomycetes;OM190;uncultured bacterium;uncultured bacterium;uncultured bacterium;uncultured bacterium	0	0	0	0	0	0	0	0	0	0	0	0	0	0	0	0	0	0	0	0	0	0	0	0	0	0	0	0	0	0	0	0	0	0	0	0	0	0	0	0	0	0	0	0	0	0	0	0	0
Planctomycetes;Phycisphaerae;Phycisphaerales;Phycisphaeraceae;CL500-3;uncultured bacterium	0	0	0	0	0	0	0	0	0	0	0	0	0	0	0	0	0	0	0	0	0	0	0	0.0112651	0	0	0	0	0	0	0	0	0	0	0	0	0	0	0	0	0	0	0	0	0	0.0113508	0	0	0
Planctomycetes;Phycisphaerae;Phycisphaerales;Phycisphaeraceae;JL-ETNP-F27;Ambiguous_taxa	0	0	0	0	0	0	0	0	0	0	0	0	0	0	0	0	0	0	0	0	0	0	0	0	0	0	0	0	0	0	0	0	0	0	0	0	0	0	0	0	0	0	0	0	0	0	0	0	0
Planctomycetes;Phycisphaerae;Phycisphaerales;Phycisphaeraceae;SM1A02;metagenome	0	0	0	0	0	0	0	0	0	0	0	0	0	0	0	0	0	0	0	0	0	0	0	0	0	0	0	0	0	0	0	0	0	0	0	0	0	0	0	0	0	0	0	0	0	0	0	0	0
Planctomycetes;Phycisphaerae;Tepidisphaerales;WD2101 soil group;uncultured bacterium;uncultured bacterium	0	0	0	0	0	0	0	0	0	0	0	0	0	0	0	0	0	0	0	0	0	0	0	0	0	0	0	0	0	0	0	0	0	0	0	0	0	0	0	0	0	0	0	0	0	0	0	0	0
Planctomycetes;Planctomycetacia;Gemmatales;Gemmataceae;Fimbriiglobus;__	0	0	0	0	0	0	0	0	0	0	0	0	0	0	0	0	0	0	0	0	0	0	0	0	0	0	0	0	0	0	0	0	0	0	0	0	0	0	0	0	0	0	0	0	0	0	0	0	0
Planctomycetes;Planctomycetacia;Gemmatales;Gemmataceae;Gemmata;__	0	0	0	0	0	0	0	0	0	0	0	0	0	0.00501941	0	0	0	0	0	0	0	0	0	0	0	0	0	0	0	0	0	0	0	0	0	0	0	0	0	0	0	0	0	0	0	0	0	0	0
Planctomycetes;Planctomycetacia;Gemmatales;Gemmataceae;Telmatocola;metagenome	0	0	0	0	0	0	0	0	0	0	0	0	0	0	0	0	0	0	0	0	0	0	0	0	0	0	0	0	0	0	0	0	0	0	0	0	0	0	0	0	0	0	0	0	0	0	0	0	0.0024569
Planctomycetes;Planctomycetacia;Gemmatales;Gemmataceae;Zavarzinella;__	0	0	0	0	0	0	0	0	0	0	0	0	0	0	0	0	0	0	0	0	0	0	0	0	0	0	0	0	0	0	0	0	0	0	0	0	0	0	0	0	0	0	0	0	0	0	0	0	0
Planctomycetes;Planctomycetacia;Isosphaerales;Isosphaeraceae;uncultured;Ambiguous_taxa	0	0	0	0.0130242	0	0	0	0	0	0	0	0	0	0	0	0	0.00734781	0	0	0	0	0	0	0	0	0	0	0	0	0	0	0	0	0	0	0	0	0	0	0	0	0	0	0	0	0	0	0	0
Planctomycetes;Planctomycetacia;Pirellulales;Pirellulaceae;Blastopirellula;uncultured bacterium	0	0	0	0	0.160411	0	0	0	0	0	0	0	0	0	0	0	0	0	0	0	0	0	0	0	0	0	0	0	0	0	0	0	0	0	0	0	0	0	0	0	0	0	0	0	0	0	0	0	0
Planctomycetes;Planctomycetacia;Pirellulales;Pirellulaceae;Blastopirellula;uncultured marine bacterium	0	0	0	0	0	0	0	0	0	0	0	0	0	0	0	0	0	0	0	0	0	0	0	0	0	0	0	0	0	0	0	0	0	0	0	0	0	0	0	0.0368499	0.0428236	0	0	0	0	0	0	0.00815195	0
Planctomycetes;Planctomycetacia;Pirellulales;Pirellulaceae;Pirellula;bacterium enrichment culture clone B176(2011)	0	0	0	0	0	0	0	0	0	0	0	0	0	0.00836568	0	0	0	0	0	0.00549081	0	0	0	0	0	0	0.00610286	0	0	0	0	0	0	0	0	0	0	0	0	0.0236892	0	0	0	0	0	0	0	0	0
Planctomycetes;Planctomycetacia;Pirellulales;Pirellulaceae;Pirellula;uncultured bacterium	0	0	0	0	0	0	0	0	0	0	0.0283536	0	0	0	0	0	0	0	0	0	0	0	0	0	0	0.00530814	0	0.0154618	0	0	0	0	0	0	0	0	0	0	0	0	0	0	0	0	0	0	0	0	0
Planctomycetes;Planctomycetacia;Pirellulales;Pirellulaceae;Rhodopirellula;uncultured organism	0	0	0	0	0	0	0	0	0	0	0	0	0	0	0	0	0	0	0	0	0	0	0	0	0	0	0	0	0	0	0	0	0	0	0	0	0	0	0	0	0	0	0	0	0	0	0	0	0
Planctomycetes;Planctomycetacia;Pirellulales;Pirellulaceae;Rubripirellula;uncultured planctomycete	0	0	0	0	0	0	0	0	0	0	0	0	0	0	0	0	0	0	0	0	0	0	0	0	0	0	0	0	0	0	0	0	0	0	0	0	0	0	0	0	0	0	0	0	0	0	0	0	0
Planctomycetes;Planctomycetacia;Pirellulales;Pirellulaceae;Rubripirellula;__	0	0	0	0	0	0	0	0	0	0	0	0	0	0	0	0	0	0	0	0	0	0	0	0	0	0	0	0	0	0	0	0	0	0	0	0	0	0	0	0	0	0	0	0	0	0	0	0	0
Planctomycetes;Planctomycetacia;Pirellulales;Pirellulaceae;uncultured;uncultured bacterium	0.0421193	0	0	0	0	0	0	0	0	0	0	0	0	0	0	0	0	0	0	0	0	0	0	0	0	0	0	0	0	0	0	0	0	0	0	0	0	0	0	0	0	0	0	0	0	0	0	0	0
Planctomycetes;Planctomycetacia;Pirellulales;Pirellulaceae;__;__	0	0	0	0	0	0	0	0	0	0	0	0	0	0	0	0	0	0	0	0	0	0	0	0	0	0	0	0	0	0	0	0	0	0	0	0	0	0	0	0	0	0	0	0	0	0	0	0	0
Planctomycetes;Planctomycetacia;Planctomycetales;Rubinisphaeraceae;Planctomicrobium;uncultured bacterium	0	0	0	0	0	0	0	0	0	0	0	0	0.0640141	0.0284433	0	0	0	0	0	0	0	0	0	0.0162718	0	0	0	0	0	0	0	0	0	0	0	0	0	0.00511817	0	0	0	0.00346356	0	0	0.0309717	0	0	0	0
Planctomycetes;Planctomycetacia;Planctomycetales;Rubinisphaeraceae;SH-PL14;Ambiguous_taxa	0.00886721	0	0	0	0	0	0	0	0	0	0	0	0	0	0	0	0	0.00281613	0	0	0	0	0	0	0	0	0	0	0	0	0	0	0	0	0.0938604	0	0	0	0	0	0.119906	0	0	0	0	0	0	0	0
Planctomycetes;Planctomycetacia;Planctomycetales;Rubinisphaeraceae;uncultured;Ambiguous_taxa	0	0	0	0	0	0	0	0	0	0	0	0	0	0	0	0	0	0	0	0	0	0	0	0	0	0	0	0	0	0	0	0	0	0	0	0	0	0	0	0	0	0	0	0	0	0	0	0.00271732	0.025388
Planctomycetes;Planctomycetacia;Planctomycetales;Rubinisphaeraceae;uncultured;metagenome	0	0	0	0	0	0	0	0.09168	0	0	0	0	0	0	0	0	0	0	0	0	0	0	0	0	0.0231864	0	0	0	0	0	0	0	0.0157525	0	0.0096621	0	0	0	0.00925869	0	0	0.00865891	0	0	0	0	0	0	0
Planctomycetes;Planctomycetacia;Planctomycetales;Rubinisphaeraceae;uncultured;__	0	0	0	0	0	0	0	0	0	0	0	0	0	0	0	0	0	0	0	0	0	0	0	0	0	0	0	0	0	0	0	0	0	0	0	0	0	0	0	0	0	0	0	0	0	0	0	0	0
Planctomycetes;Planctomycetacia;Planctomycetales;uncultured;metagenome;metagenome	0	0	0	0	0	0	0	0	0	0	0	0	0	0	0	0	0	0	0	0	0	0	0	0	0	0	0	0	0	0	0	0	0	0	0	0	0	0	0	0	0	0	0	0	0	0	0	0	0
Planctomycetes;Planctomycetacia;Planctomycetales;uncultured;uncultured bacterium;uncultured bacterium	0	0	0	0	0	0	0	0	0	0	0	0	0	0	0	0	0	0	0	0	0	0	0	0	0	0	0	0	0	0	0	0	0	0	0	0.00497723	0	0	0	0	0	0	0	0	0	0	0	0	0
Planctomycetes;Planctomycetacia;Planctomycetales;uncultured;__;__	0	0	0	0	0	0	0	0	0	0	0	0	0.0120026	0	0	0	0.0900107	0	0	0	0	0	0	0	0	0	0	0	0	0	0	0	0	0	0	0	0	0	0	0.0157928	0	0	0	0	0	0	0	0	0
Proteobacteria;Alphaproteobacteria;Acetobacterales;Acetobacteraceae;Acetobacter;Ambiguous_taxa	0	0	0	0	0	0	0	0	0	0	0	0	0	0	0	0	0	0	0	0	0	0	0	0	0	0	0	0	0	0	0	0.0228818	0	0	0	0.0423064	0.0149296	0	0	0.00526427	0	0	0	0	0	0	0	0	0.266983
Proteobacteria;Alphaproteobacteria;Acetobacterales;Acetobacteraceae;Acetobacter;Acetobacter lovaniensis	0	0	0	0	0	0	0	0	0	0	0	0	0	0	0	0	0	0	0	0	0	0	0	0	0	0	0	0	0	0	0	0	0	0	0	0	0	0	0	0	0	0	0	0	0	0	0	0	0.0114655
Proteobacteria;Alphaproteobacteria;Acetobacterales;Acetobacteraceae;Acetobacter;__	0	0	0	0	0	0	0	0	0	0	0	0	0	0.0200776	0	0	0	0	0	0	0	0	0	0	0	0	0	0	0	0.0368831	0	0	0	0	0	0	0	0	0	0	0	0	0	0	0	0	0	0	0
Proteobacteria;Alphaproteobacteria;Acetobacterales;Acetobacteraceae;Rhodovarius;__	0	0	0	0	0	0	0	0	0	0	0	0	0	0	0	0	0	0	0	0	0	0	0	0	0	0	0	0	0	0	0	0	0	0	0	0	0	0	0	0	0	0	0	0	0	0	0.0608809	0	0
Proteobacteria;Alphaproteobacteria;Acetobacterales;Acetobacteraceae;Rhodovastum;metagenome	0.0665041	0	0	0.196547	0	0	0	0	0	0.0358304	0.0283536	0	0.0940207	0	0	0	0	0.117573	0	0	0.0360868	0	0	0	0	0	0	0	0	0	0	0	0	0	0	0	0	0	0.0246898	0	0	0	0	0.0163649	0	0	0	0	0
Proteobacteria;Alphaproteobacteria;Acetobacterales;Acetobacteraceae;Roseomonas;Ambiguous_taxa	0	0	0.0683589	0	0	0	0	0	0	0	0	0	0	0	0	0	0	0	0	0	0	0	0	0	0	0	0	0	0	0	0	0	0	0	0	0	0	0	0	0	0	0	0	0	0	0	0.00228304	0	0
Proteobacteria;Alphaproteobacteria;Acetobacterales;Acetobacteraceae;Roseomonas;metagenome	0	0	0	0	0	0	0	0	0	0	0	0	0	0	0	0	0	0	0	0	0	0	0	0	0	0	0.00762858	0	0	0	0	0	0	0	0	0	0	0	0	0.0368499	0	0	0	0	0	0	0	0	0
Proteobacteria;Alphaproteobacteria;Acetobacterales;Acetobacteraceae;uncultured;uncultured Acetobacteraceae bacterium	0	0	0	0	0	0	0	0	0	0	0	0	0	0	0	0	0	0	0	0	0	0	0	0	0.00927457	0	0.0183086	0	0.0181017	0.0098355	0.0192103	0	0	0	0	0	0	0	0	0	0	0	0	0	0	0	0	0	0
Proteobacteria;Alphaproteobacteria;Acetobacterales;Acetobacteraceae;__;__	0	0	0	0	0	0	0	0	0	0	0	0	0	0	0	0	0	0	0	0	0	0	0	0	0.0386441	0	0	0	0.0116368	0	0	0	0	0	0	0	0	0	0	0	0	0	0	0	0	0	0	0	0
Proteobacteria;Alphaproteobacteria;Azospirillales;Azospirillaceae;Niveispirillum;Ambiguous_taxa	0	0	0	0	0	0	0	0	0.010667	0	0.0238767	0	0	0	0	0	0	0	0	0	0	0	0	0	0	0	0	0	0	0	0	0	0	0	0	0	0	0	0	0	0	0	0	0	0	0	0	0	0
Proteobacteria;Alphaproteobacteria;Caulobacterales;Caulobacteraceae;Brevundimonas;__	0	0	0	0	0	0	0	0	0	0	0	0	0	0.0920225	0	0	0	0.0689951	0	0	0	0	0	0	0	0	0	0	0.0323244	0	0.00791014	0	0	0.0346269	0	0	0	0	0	0	0	0	0	0.0461193	0	0	0	0	0
Proteobacteria;Alphaproteobacteria;Caulobacterales;Caulobacteraceae;Phenylobacterium;Ambiguous_taxa	0	0	0	0	0	0	0	0	0	0	0	0	0	0	0	0	0	0	0	0	0	0	0	0	0	0	0	0	0	0	0	0	0	0	0	0	0	0	0	0	0	0	0	0	0	0	0	0	0
Proteobacteria;Alphaproteobacteria;Kordiimonadales;uncultured;Ambiguous_taxa;Ambiguous_taxa	0	0	0	0	0	0	0	0	0	0	0	0	0	0	0	0	0	0	0	0	0	0	0	0.0100134	0	0	0	0	0	0.0098355	0	0	0	0	0	0	0	0	0	0	0	0	0	0	0	0	0	0	0
Proteobacteria;Alphaproteobacteria;Micavibrionales;uncultured;uncultured bacterium;uncultured bacterium	0	0	0	0	0	0	0	0	0	0	0	0	0	0	0	0	0	0	0	0	0	0	0	0	0	0	0	0	0	0	0	0	0	0	0	0	0	0	0	0	0	0	0	0	0.136792	0	0	0	0
Proteobacteria;Alphaproteobacteria;Paracaedibacterales;Paracaedibacteraceae;Candidatus Paracaedibacter;Ambiguous_taxa	0.133008	0	0	0	0	0	0	0	0.0995591	0	0.111922	0	0	0	0	0	0	0	0	0	0	0	0	0	0	0	0	0	0	0	0	0	0.0472575	0	0	0	0	0.0243113	0	0	0	0	0	0	0	0	0.00304405	0	0
Proteobacteria;Alphaproteobacteria;Paracaedibacterales;Paracaedibacteraceae;uncultured;uncultured Acetobacteraceae bacterium	0	0	0	0	0	0	0	0	0	0	0	0	0	0	0	0	0	0	0	0	0	0	0	0	0	0	0	0	0	0	0	0	0	0	0	0	0	0	0	0	0	0	0	0	0	0	0	0	0
Proteobacteria;Alphaproteobacteria;Parvibaculales;OCS116 clade;Ambiguous_taxa;Ambiguous_taxa	0	0	0	0	0	0	0	0	0	0	0	0	0	0	0	0	0	0	0	0	0	0	0	0	0	0	0	0	0	0.0295065	0	0	0	0	0	0.100789	0.0373239	0	0	0	0	0	0	0	0	0.00993197	0	0	0
Proteobacteria;Alphaproteobacteria;Puniceispirillales;SAR116 clade;Ambiguous_taxa;Ambiguous_taxa	0	0	0	0	0	0	0	0	0	0	0	0	0	0	0	0	0	0	0.00944042	0	0	0	0	0	0	0	0	0	0	0	0.0101702	0	0	0	0	0	0	0	0	0	0	0	0	0	0	0	0	0	0
Proteobacteria;Alphaproteobacteria;Puniceispirillales;SAR116 clade;uncultured marine bacterium;uncultured marine bacterium	0	0	0	0	0	0	0	0	0	0	0	0	0	0	0	0	0	0	0	0	0	0.00676819	0	0.00876172	0.0154576	0.00606644	0.03204	0	0.00646488	0	0	0	0	0	0	0	0	0	0	0	0	0	0	0	0	0	0	0	0
Proteobacteria;Alphaproteobacteria;Puniceispirillales;SAR116 clade;__;__	0	0	0	0	0	0	0	0	0	0	0	0	0	0	0	0	0	0	0	0	0.0721736	0.0118443	0	0.0112651	0	0	0	0	0	0.0221299	0.00452008	0	0	0	0	0	0	0	0	0	0.0907861	0	0	0	0	0	0	0	0
Proteobacteria;Alphaproteobacteria;Puniceispirillales;uncultured;Ambiguous_taxa;Ambiguous_taxa	0	0	0	0	0	0	0	0	0	0	0	0	0	0	0	0	0	0	0	0	0	0	0	0	0	0	0	0	0	0	0	0	0	0	0	0	0	0	0	0	0	0	0	0	0	0	0	0	0
Proteobacteria;Alphaproteobacteria;Rhizobiales;A0839;uncultured bacterium;uncultured bacterium	0	0	0	0.145635	0	0	0	0	0	0	0	0	0	0	0	0	0	0.0197129	0	0	0	0	0	0	0	0.00151661	0	0	0	0	0	0	0	0	0	0	0	0.00511817	0	0	0	0	0	0	0	0	0	0	0
Proteobacteria;Alphaproteobacteria;Rhizobiales;A0839;__;__	0	0	0	0	0	0	0	0	0	0	0	0	0	0	0	0	0	0	0	0	0	0	0	0.0287885	0	0	0	0	0	0	0	0	0	0	0	0	0.0429225	0	0	0	0	0	0	0	0	0	0	0	0
Proteobacteria;Alphaproteobacteria;Rhizobiales;Beijerinckiaceae;1174-901-12;uncultured bacterium	0	0	0	0	0	0	0	0	0	0	0	0	0	0	0	0	0	0	0	0	0.0279382	0	0	0	0	0	0	0	0	0	0	0	0	0	0	0	0	0	0	0	0	0	0	0	0	0	0	0	0
Proteobacteria;Alphaproteobacteria;Rhizobiales;Beijerinckiaceae;Bosea;Ambiguous_taxa	0	0	0	0	0	0	0	0	0	0	0	0	0	0	0	0	0	0	0	0	0	0	0	0	0	0	0	0	0	0	0	0	0	0	0	0	0	0	0	0	0	0	0	0	0	0	0.0372896	0	0
Proteobacteria;Alphaproteobacteria;Rhizobiales;Beijerinckiaceae;Bosea;__	0	0	0	0	0	0	0	0	0	0	0	0	0	0	0	0	0	0	0	0	0	0	0	0	0	0	0.0167829	0	0	0	0	0	0	0	0	0	0	0	0	0	0	0	0	0	0	0	0	0	0
Proteobacteria;Alphaproteobacteria;Rhizobiales;Beijerinckiaceae;Chelatococcus;Ambiguous_taxa	0	0	0	0	0	0	0	0	0	0	0	0	0	0	0	0	0	0	0	0	0	0	0	0	0	0	0	0	0	0	0	0	0	0	0	0	0	0	0	0	0	0	0	0	0	0	0	0	0
Proteobacteria;Alphaproteobacteria;Rhizobiales;Beijerinckiaceae;Methylobacterium;Ambiguous_taxa	0	0	0	0	0	0	0	0	0	0	0	0	0	0	0	0	0	0	0.0118005	0	0	0.037225	0	0.00375502	0.0154576	0.027299	0	0	0	0	0.0418107	0	0	0	0	0	0	0.0358272	0	0	0	0	0	0	0	0	0	0	0
Proteobacteria;Alphaproteobacteria;Rhizobiales;Beijerinckiaceae;Methylobacterium;Methylobacterium sp. LC529	0	0	0	0	0	0	0	0.02292	0	0	0	0	0	0	0	0	0.0532716	0	0	0	0	0	0	0	0	0	0	0	0	0	0	0	0	0	0	0	0	0	0	0	0	0	0	0	0	0	0	0	0
Proteobacteria;Alphaproteobacteria;Rhizobiales;Beijerinckiaceae;Methylobacterium;__	0	0	0	0	0	0	0	0	0	0	0	0	0	0	0	0	0	0	0	0	0.0104768	0	0	0	0	0.0356404	0	0	0	0	0.0124302	0.0305091	0	0.0197868	0	0	0	0	0	0	0.292914	0	0	0	0	0	0	0	0
Proteobacteria;Alphaproteobacteria;Rhizobiales;Beijerinckiaceae;Methylorosula;Ambiguous_taxa	0	0	0	0	0	0	0	0	0	0	0	0	0	0	0	0	0	0	0	0	0	0	0	0	0	0	0	0	0	0	0	0	0	0	0	0	0	0	0	0	0.0119906	0	0	0	0	0	0	0	0
Proteobacteria;Alphaproteobacteria;Rhizobiales;Beijerinckiaceae;alphaI cluster;metagenome	0	0	0	0	0	0	0	0	0	0	0	0	0	0	0	0	0	0	0	0	0	0	0	0	0	0	0	0	0	0	0	0	0	0	0	0	0	0	0	0	0	0	0	0	0	0	0	0	0
Proteobacteria;Alphaproteobacteria;Rhizobiales;Beijerinckiaceae;__;__	0	0	0	0	0	0	0	0	0	0	0	0	0	0	0	0	0	0	0	0	0	0	0	0	0	0	0	0	0	0	0	0	0	0	0	0	0.0709154	0	0	0	0	0	0	0	0	0	0	0	0
Proteobacteria;Alphaproteobacteria;Rhizobiales;Devosiaceae;Devosia;Ambiguous_taxa	0	0	0	0	0	0	0	0	0	0	0	0	0	0	0	0	0	0	0	0	0	0	0	0	0.0494644	0	0	0	0	0	0	0	0	0	0	0	0	0	0	0	0	0	0	0	0	0	0	0	0
Proteobacteria;Alphaproteobacteria;Rhizobiales;Hyphomicrobiaceae;Hyphomicrobium;Ambiguous_taxa	0	0	0	0	0	0	0	0	0	0	0	0	0	0	0	0	0	0	0	0	0	0	0	0	0	0	0	0	0	0	0	0	0	0	0	0	0	0	0	0	0	0	0	0	0	0	0	0	0.0114655
Proteobacteria;Alphaproteobacteria;Rhizobiales;Hyphomicrobiaceae;Hyphomicrobium;metagenome	0	0	0	0	0	0	0	0	0	0	0	0	0	0	0	0	0	0	0	0	0	0	0	0.00876172	0	0	0	0	0	0	0	0	0	0	0	0	0	0	0	0	0	0	0	0	0	0	0	0	0
Proteobacteria;Alphaproteobacteria;Rhizobiales;Hyphomicrobiaceae;__;__	0	0	0	0	0	0	0	0	0	0	0	0	0	0	0	0	0	0	0	0	0.0139691	0	0	0	0	0	0	0	0	0	0	0	0	0	0	0	0	0	0	0	0	0	0	0	0	0	0.0136982	0	0
Proteobacteria;Alphaproteobacteria;Rhizobiales;Rhizobiaceae;Allorhizobium-Neorhizobium-Pararhizobium-Rhizobium;Ambiguous_taxa	0	0	0	0	0	0	0	0	0	0	0	0	0	0	0	0	0.0110217	0	0	0.0535354	0	0.0135364	0	0	0	0	0	0	0	0.0368831	0.0282505	0	0	0	0	0	0	0	0.0493797	0.0315856	0	0	0	0	0	0	0	0	0
Proteobacteria;Alphaproteobacteria;Rhizobiales;Rhizobiaceae;Allorhizobium-Neorhizobium-Pararhizobium-Rhizobium;Rhizobium sp. Hue-6	0	0	0	0	0	0	0	0	0	0	0	0	0	0	0	0	0	0	0	0	0	0	0	0	0	0	0	0	0	0	0	0	0	0	0	0.00622154	0	0	0	0	0	0	0	0	0	0	0	0	0
Proteobacteria;Alphaproteobacteria;Rhizobiales;Rhizobiaceae;Allorhizobium-Neorhizobium-Pararhizobium-Rhizobium;uncultured compost bacterium	0	0	0	0	0	0	0	0	0	0	0	0	0	0	0	0	0	0	0	0	0	0	0	0.0187751	0	0	0	0	0	0	0	0	0	0	0	0	0	0	0	0.0421141	0	0	0	0	0	0	0	0	0
Proteobacteria;Alphaproteobacteria;Rhizobiales;Rhizobiaceae;Allorhizobium-Neorhizobium-Pararhizobium-Rhizobium;__	0	0	0	0	0	0	0	0	0	0	0	0	0	0	0	0	0	0.0682911	0.0259612	0	0	0	0	0	0	0	0.0152572	0	0	0.00737663	0.0101702	0.0317803	0	0	0.0082818	0.0124431	0	0	0.0185174	0	0	0	0	0.0208281	0	0	0	0	0
Proteobacteria;Alphaproteobacteria;Rhizobiales;Rhizobiaceae;Aminobacter;uncultured bacterium	0	0	0	0	0	0	0	0	0	0	0	0	0	0	0	0	0	0	0	0	0	0	0	0	0	0	0	0	0	0	0	0	0	0	0	0	0	0	0	0	0	0	0	0	0	0	0	0	0
Proteobacteria;Alphaproteobacteria;Rhizobiales;Rhizobiaceae;Mesorhizobium;__	0	0	0	0	0	0	0	0	0	0	0	0	0	0	0	0	0	0	0	0	0	0	0	0	0	0	0	0	0.0271525	0	0	0	0	0	0	0	0	0	0	0	0	0	0	0	0	0.00709426	0.0106542	0	0
Proteobacteria;Alphaproteobacteria;Rhizobiales;Rhizobiaceae;Ochrobactrum;Ochrobactrum sp. TX-100	0	0	0	0	0	0	0	0	0	0	0	0	0	0	0	0	0.0808259	0	0	0	0	0	0	0	0	0	0	0	0	0	0	0	0	0	0	0	0	0	0	0	0	0	0	0	0	0	0	0	0
Proteobacteria;Alphaproteobacteria;Rhizobiales;Rhizobiaceae;Ochrobactrum;__	0	0	0	0	0	0	0	0	0	0	0	0	0	0	0	0	0	0	0	0	0	0	0	0	0	0	0	0	0	0	0	0	0	0	0	0.0261305	0	0	0	0	0	0	0	0	0	0	0	0	0
Proteobacteria;Alphaproteobacteria;Rhizobiales;Rhizobiaceae;Paenochrobactrum;__	0	0	0	0	0	0	0	0	0	0	0	0	0	0	0	0	0	0	0	0	0	0	0	0	0	0	0	0	0	0	0	0	0	0	0	0	0	0	0	0	0.0325459	0	0	0	0	0	0	0	0
Proteobacteria;Alphaproteobacteria;Rhizobiales;Rhizobiaceae;Pseudahrensia;Ahrensia sp. R2A130	0	0	0	0	0	0	0	0	0	0	0	0	0	0	0	0	0	0	0	0	0	0	0	0	0	0	0	0	0	0	0	0	0	0	0	0	0	0	0	0	0	0	0	0	0	0	0	0	0
Proteobacteria;Alphaproteobacteria;Rhizobiales;Rhizobiaceae;Pseudahrensia;uncultured bacterium	0	0	0	0	0	0	0	0	0	0	0	0	0	0	0	0	0	0	0	0	0	0	0	0.00375502	0	0	0	0	0	0	0	0	0	0	0	0	0	0	0	0	0	0	0	0	0	0	0	0	0
Proteobacteria;Alphaproteobacteria;Rhizobiales;Rhizobiaceae;uncultured;Ambiguous_taxa	0.0554201	0	0.0653208	0.0165763	0	0	0	0	0	0.0307117	0	0	0	0	0	0	0	0	0	0	0	0	0	0	0	0	0	0	0	0	0	0	0	0	0	0	0	0	0	0	0	0	0	0	0	0	0	0	0
Proteobacteria;Alphaproteobacteria;Rhizobiales;Rhizobiaceae;__;__	0	0	0	0	0	0	0	0	0	0	0	0	0	0	0	0	0	0	0	0	0	0.0135364	0	0	0	0	0	0	0	0	0.0158203	0	0	0	0	0	0	0	0	0	0	0	0	0	0	0	0	0	0
Proteobacteria;Alphaproteobacteria;Rhizobiales;Rhizobiales Incertae Sedis;uncultured;Ambiguous_taxa	0	0	0	0	0	0	0	0	0	0	0	0	0	0	0	0	0	0.00633629	0	0	0	0	0	0	0	0.0189576	0	0	0	0	0	0	0	0	0.0372681	0	0	0	0	0	0	0	0	0	0	0	0	0	0
Proteobacteria;Alphaproteobacteria;Rhizobiales;Stappiaceae;Pannonibacter;uncultured bacterium	0	0	0	0	0	0	0	0	0	0.0102372	0	0	0	0	0	0	0	0	0	0	0	0	0	0	0	0	0	0	0	0	0	0	0	0	0	0	0	0	0	0	0	0	0	0	0	0	0	0	0
Proteobacteria;Alphaproteobacteria;Rhizobiales;Xanthobacteraceae;Bradyrhizobium;__	0	0	0	0	0	0	0	0	0	0	0	0	0	0	0	0	0	0	0	0	0	0	0	0	0	0	0	0	0	0	0	0	0	0	0	0	0	0	0	0	0.0959249	0	0	0	0	0	0	0	0
Proteobacteria;Alphaproteobacteria;Rhizobiales;Xanthobacteraceae;__;__	0	0	0	0	0	0	0	0	0	0	0	0	0	0	0	0	0	0	0	0	0	0	0	0	0	0	0	0	0	0	0	0	0	0	0	0	0	0	0	0	0.0325459	0	0	0	0	0	0	0	0.0679743
Proteobacteria;Alphaproteobacteria;Rhizobiales;__;__;__	0	0	0	0	0	0	0	0	0	0	0	0	0	0	0	0	0	0	0	0	0	0	0	0	0	0	0	0	0	0	0	0	0	0	0	0	0	0	0	0	0	0	0	0	0	0	0.00532708	0	0
Proteobacteria;Alphaproteobacteria;Rhodobacterales;Rhodobacteraceae;Ascidiaceihabitans;__	0	0	0	0	0	0	0	0	0	0	0	0	0	0	0	0	0	0	0.0401218	0	0	0	0	0.00751004	0	0	0	0	0.0129298	0	0	0.0101697	0	0	0	0	0	0	0	0	0	0	0	0	0	0	0	0	0
Proteobacteria;Alphaproteobacteria;Rhodobacterales;Rhodobacteraceae;Cereibacter;uncultured alpha proteobacterium	0	0	0	0	0	0	0	0	0	0	0	0	0	0	0	0	0	0	0	0	0	0	0	0	0	0	0	0	0	0	0	0	0	0	0	0	0	0	0	0	0	0	0	0	0	0	0	0	0
Proteobacteria;Alphaproteobacteria;Rhodobacterales;Rhodobacteraceae;Defluviimonas;Ambiguous_taxa	0	0	0	0	0	0	0	0	0	0	0	0	0	0	0	0	0	0	0	0	0	0	0	0	0	0	0	0	0	0	0	0	0	0	0	0	0	0	0	0	0	0	0	0	0	0	0.108064	0	0
Proteobacteria;Alphaproteobacteria;Rhodobacterales;Rhodobacteraceae;Falsirhodobacter;metagenome	0	0	0	0	0	0	0	0	0	0	0	0	0	0	0	0	0	0	0	0	0	0	0	0	0	0	0	0	0	0	0	0	0	0	0	0	0	0	0	0	0	0	0	0	0	0	0	0	0
Proteobacteria;Alphaproteobacteria;Rhodobacterales;Rhodobacteraceae;Lentibacter;__	0	0	0	0	0	0	0	0	0	0	0	0	0	0	0	0	0	0.0267532	0.0165207	0	0	0	0	0.0225301	0.0355525	0.0128912	0.00610286	0	0.0181017	0.0934373	0.0384207	0.0152546	0	0	0	0	0	0	0	0	0	0	0	0	0	0	0	0	0
Proteobacteria;Alphaproteobacteria;Rhodobacterales;Rhodobacteraceae;Loktanella;uncultured bacterium	0	0	0	0	0	0	0	0	0	0	0	0	0	0	0	0	0	0	0	0	0	0	0	0	0	0	0	0	0	0	0	0	0	0	0	0	0	0	0	0	0	0	0	0	0	0	0	0	0.0646984
Proteobacteria;Alphaproteobacteria;Rhodobacterales;Rhodobacteraceae;Paracoccus;__	0	0	0	0	0	0	0	0	0	0.0191948	0	0	0	0	0	0	0.0808259	0	0.0188808	0	0	0	0	0	0	0	0	0	0	0	0	0	0.88214	1.52606	0.317469	1.20822	0.188486	0.667921	0.725264	0.273742	0	0	0	0	0	0	0	0	0
Proteobacteria;Alphaproteobacteria;Rhodobacterales;Rhodobacteraceae;Planktomarina;__	0	0	0	0	0	0	0	0	0	0	0	0	0	0	0	0	0	0.0302734	0	0	0	0	0	0	0.0494644	0	0.0534001	0.00773091	0.0193946	0	0.0180803	0	0	0	0	0	0	0	0	0	0	0	0	0	0	0	0	0	0
Proteobacteria;Alphaproteobacteria;Rhodobacterales;Rhodobacteraceae;Pseudorhodobacter;metagenome	0	0	0	0	0	0	0	0	0	0	0	0	0	0	0	0	0	0	0	0	0	0	0	0	0	0	0	0	0	0	0.00791014	0	0	0	0	0	0	0	0	0	0	0.00519534	0	0	0	0	0	0	0
Proteobacteria;Alphaproteobacteria;Rhodobacterales;Rhodobacteraceae;Pseudorhodobacter;__	0	0	0	0.0118402	0	0	0	0	0	0	0	0	0	0	0	0	0	0.0542105	0	0	0	0	0	0	0	0.00682475	0	0	0	0	0	0	0	0	0	0	0	0	0	0	0	0	0	0	0	0.00638484	0	0	0
Proteobacteria;Alphaproteobacteria;Rhodobacterales;Rhodobacteraceae;Rhodobacter;Ambiguous_taxa	0	0	0	0	0	0	0	0	0	0	0	0	0	0	0	0	0	0	0	0	0	0	0	0	0	0	0	0	0	0	0	0	0	0	0	0	0	0	0	0	0	0	0	0	0	0	0	0	0
Proteobacteria;Alphaproteobacteria;Rhodobacterales;Rhodobacteraceae;Rhodobacter;__	0	0.00353051	0	0	0	0	0	0	0	0	0.0298458	0	0	0	0	0	0	0	0	0	0	0	0	0	0	0	0	0	0	0	0	0	0	0	0	0	0	0	0	0	0	0	0	0	0	0	0	0	0
Proteobacteria;Alphaproteobacteria;Rhodobacterales;Rhodobacteraceae;Sulfitobacter;uncultured Sulfitobacter sp.	0	0	0	0	0	0	0	0	0	0	0	0	0	0	0	0	0	0	0	0	0	0	0	0	0.0139119	0	0	0	0	0	0	0	0	0	0	0	0	0	0	0	0	0	0	0	0	0	0	0	0.0343966
Proteobacteria;Alphaproteobacteria;Rhodobacterales;Rhodobacteraceae;Tabrizicola;Ambiguous_taxa	0	0	0	0	0	0	0	0	0	0	0	0	0	0	0	0	0	0	0	0	0	0	0	0	0	0	0	0	0	0	0	0	0	0	0.027606	0	0	0	0	0	0	0	0	0	0	0	0	0	0
Proteobacteria;Alphaproteobacteria;Rhodobacterales;Rhodobacteraceae;Tabrizicola;uncultured bacterium	0	0	0	0	0	0	0	0	0	0.0332711	0	0	0	0	0	0	0	0	0	0.00686351	0	0	0	0	0	0	0	0	0	0	0	0	0	0	0	0	0	0	0	0	0	0.00865891	0	0	0	0	0	0	0
Proteobacteria;Alphaproteobacteria;Rhodobacterales;Rhodobacteraceae;Tabrizicola;__	0	0	0	0	0	0	0	0	0	0	0	0	0	0	0	0	0	0	0	0	0	0	0	0	0	0	0	0	0	0	0	0	0	0	0	0	0	0	0	0	0	0	0	0	0	0	0	0	0
Proteobacteria;Alphaproteobacteria;Rhodobacterales;Rhodobacteraceae;Tateyamaria;uncultured marine bacterium	0	0	0	0	0	0	0	0	0	0	0	0	0	0	0	0	0	0	0	0.00823621	0	0	0	0	0	0	0.0183086	0	0	0	0	0	0	0.0618337	0.0565923	0.0423064	0.0391901	0.0690952	0.135794	0.276374	0.0462495	0	0.00408726	0.047607	0.358756	0.13621	0	0.0149452	0
Proteobacteria;Alphaproteobacteria;Rhodobacterales;Rhodobacteraceae;__;__	0	0	0	0	0	0	0	0	0	0	0	0	0	0	0	0	0	0	0	0	0	0	0	0	0	0	0	0.00913653	0	0	0	0	0	0	0	0	0	0	0	0	0	0	0	0	0	0	0	0	0
Proteobacteria;Alphaproteobacteria;Rhodospirillales;Magnetospiraceae;Magnetospira;Ambiguous_taxa	0	0	0	0	0	0	0	0	0	0	0	0	0	0	0	0	0	0	0	0	0.0349227	0	0	0	0	0	0	0	0	0	0	0.0101697	0	0	0	0	0	0	0	0	0	0	0	0	0	0	0	0	0
Proteobacteria;Alphaproteobacteria;Rhodospirillales;Magnetospiraceae;uncultured;Ambiguous_taxa	0	0	0	0	0	0	0	0	0	0	0	0	0	0	0	0	0	0	0.00708031	0	0	0	0	0	0	0	0	0	0	0	0	0.0368652	0	0	0	0	0	0	0	0	0	0	0	0	0	0	0	0	0
Proteobacteria;Alphaproteobacteria;Rhodospirillales;Magnetospiraceae;uncultured;__	0	0	0	0	0	0	0	0	0	0	0	0	0	0	0	0	0	0	0	0	0	0	0	0	0	0	0	0	0	0	0	0	0	0	0	0	0	0	0.0370348	0	0	0	0	0	0	0	0	0	0
Proteobacteria;Alphaproteobacteria;Rhodospirillales;Magnetospirillaceae;Magnetospirillum;Ambiguous_taxa	0	0	0	0	0	0	0	0	0	0	0	0	0	0	0	0	0	0	0	0	0	0	0	0	0	0	0	0	0	0	0	0	0	0	0	0	0	0	0	0	0	0	0	0	0	0	0	0	0.0237501
Proteobacteria;Alphaproteobacteria;Rhodospirillales;Rhodospirillaceae;uncultured;Ambiguous_taxa	0	0	0	0	0	0	0	0	0	0	0	0	0	0	0	0	0	0	0	0	0	0	0	0	0	0	0	0	0	0	0	0	0	0	0	0	0	0	0	0	0	0	0	0	0	0	0	0	0
Proteobacteria;Alphaproteobacteria;Rhodospirillales;uncultured;metagenome;metagenome	0	0.0114742	0	0	0	0	0	0	0	0	0	0	0	0	0	0	0	0	0	0	0	0	0	0	0	0	0	0	0	0	0	0	0	0	0	0	0	0	0	0	0	0	0	0	0	0	0	0	0
Proteobacteria;Alphaproteobacteria;Rickettsiales;Rickettsiaceae;Candidatus Megaira;__	0	0	0	0	0	0	0	0.00982286	0.00711136	0	0	0	0	0	0	0	0	0	0	0	0.00582045	0	0	0.00625837	0	0	0	0	0	0	0	0.0368652	0	0	0	0	0	0	0	0	0	0	0	0	0	0	0	0	0
Proteobacteria;Alphaproteobacteria;Rickettsiales;Rickettsiaceae;uncultured;uncultured alpha proteobacterium	0	0	0	0	0	0	0	0	0	0	0	0	0	0	0	0	0	0	0	0	0	0	0	0	0	0	0	0.0126506	0.0284455	0	0	0	0.0346555	0	0	0	0	0	0	0	0	0	0	0	0	0	0	0	0
Proteobacteria;Alphaproteobacteria;Rickettsiales;Rickettsiaceae;uncultured;uncultured bacterium	0	0	0	0	0	0	0	0	0	0	0	0	0	0	0	0	0	0	0	0	0	0	0	0	0	0	0	0	0	0	0	0	0	0	0	0	0	0	0	0	0	0	0	0	0	0	0	0	0
Proteobacteria;Alphaproteobacteria;SAR11 clade;Ambiguous_taxa;Ambiguous_taxa;Ambiguous_taxa	0	0	0	0	0	0	0	0	0	0	0	0	0	0	0	0	0	0	0	0	0	0	0	0	0	0	0	0	0	0.0147533	0	0	0	0	0	0	0	0.00895679	0	0	0	0.0121225	0	0	0	0	0	0	0
Proteobacteria;Alphaproteobacteria;SAR11 clade;Clade I;Clade Ia;__	0	0	0	0	0	0	0	0	0	0	0	0	0	0	0	0	0.664977	2.08323	0.200609	0.189433	0.739197	0.172589	0.00914101	1.59338	0.92282	0.141803	0.472972	0.300803	1.08739	2.80066	0.509639	0.341956	0.292996	0.0173134	0.0703953	0.159271	0	0.244392	0.645022	0.302695	0.0462495	0.00865891	0.00817453	0.0996772	1.04013	0.109252	0	0.0108693	0
Proteobacteria;Alphaproteobacteria;SAR11 clade;Clade II;Ambiguous_taxa;Ambiguous_taxa	0	0	0	0	0	0	0	0	0	0	0	0	0	0	0	0	0	0	0	0	0	0	0	0.00751004	0	0	0	0	0	0	0.0146903	0	0	0	0	0	0	0	0	0	0	0	0.00204363	0	0	0	0	0	0
Proteobacteria;Alphaproteobacteria;SAR11 clade;Clade II;unidentified marine bacterioplankton;unidentified marine bacterioplankton	0	0	0	0	0	0	0	0	0	0	0	0	0	0	0	0	0	0	0	0	0	0	0	0	0	0	0	0	0	0	0	0	0	0	0	0	0	0	0	0	0	0	0	0.0178526	0	0	0	0	0
Proteobacteria;Alphaproteobacteria;SAR11 clade;Clade II;__;__	0	0	0	0	0	0	0	0	0	0	0	0	0	0	0	0	0	0.0499863	0.0566425	0	0	0	0	0.0388019	0.0819254	0.0166827	0.0289886	0.0253012	0.0284455	0.0663896	0	0.0317803	0	0	0.0510711	0.0920787	0	0.0191931	0.0956731	0	0	0	0	0.0461193	0	0.0113508	0	0.00271732	0
Proteobacteria;Alphaproteobacteria;SAR11 clade;Clade III;uncultured bacterium;uncultured bacterium	0	0	0	0	0	0	0	0	0	0	0	0	0	0	0	0	0	0	0	0	0	0	0	0	0	0	0	0	0	0	0	0	0	0	0	0	0	0	0	0	0	0	0	0	0	0	0	0	0.0024569
Proteobacteria;Alphaproteobacteria;SAR11 clade;Clade III;uncultured marine bacterium;uncultured marine bacterium	0	0	0	0	0	0	0	0	0	0	0	0	0	0	0	0	0	0.0591387	0.00472021	0	0.0756659	0	0	0	0.0355525	0	0.105274	0.029518	0.0258595	0.0860606	0	0	0	0	0	0	0	0	0	0	0	0	0	0	0	0	0	0	0
Proteobacteria;Alphaproteobacteria;SAR11 clade;Clade IV;Ambiguous_taxa;Ambiguous_taxa	0	0	0	0	0	0	0	0	0	0	0	0	0	0	0	0	0.0734781	0.0513943	0	0.00549081	0.0488918	0	0	0.0237818	0.0494644	0.0219909	0.02136	0.0274096	0	0.115567	0.0678012	0.0203394	0	0	0	0	0	0	0	0	0	0	0	0	0	0	0	0	0
Proteobacteria;Alphaproteobacteria;Sphingomonadales;Sphingomonadaceae;Altererythrobacter;__	0	0	0	0	0	0	0	0	0	0	0	0	0	0	0	0	0	0	0	0	0	0	0	0	0	0	0	0	0	0	0	0.0343228	0	0	0	0	0	0	0	0.178985	0	0	0	0	0	0	0	0	0
Proteobacteria;Alphaproteobacteria;Sphingomonadales;Sphingomonadaceae;Novosphingobium;__	0	0	0	0	0	0	0	0	0	0	0	0	0	0	0	0	0	0	0	0	0	0	0	0	0	0	0	0	0	0	0	0	0	0	0	0	0	0	0	0	0	0	0	0	0	0	0	0	0.0597846
Proteobacteria;Alphaproteobacteria;Sphingomonadales;Sphingomonadaceae;Sphingobium;alpha proteobacterium PI_GH4.1.H5	0	0	0	0	0	0	0	0	0	0	0	0	0	0	0	0	0	0	0	0	0	0	0	0	0	0	0	0	0	0	0	0	0	0	0	0	0	0	0	0	0	0	0	0	0	0	0	0	0
Proteobacteria;Alphaproteobacteria;Sphingomonadales;Sphingomonadaceae;Sphingobium;__	0	0	0	0	0	0	0	0	0	0	0	0	0	0	0	0	0	0	0	0	0	0	0	0	0	0	0.0183086	0	0	0	0	0	0	0	0	0	0	0	0	0	0	0	0	0	0	0	0	0	0
Proteobacteria;Alphaproteobacteria;Sphingomonadales;Sphingomonadaceae;Sphingomonas;Ambiguous_taxa	0	0	0	0	0	0	0	0	0	0	0	0	0	0	0	0	0.0642933	0	0	0	0	0	0	0	0	0	0	0	0	0	0	0	0	0.0321535	0	0	0.0223943	0	0	0	0	0	0	0	0	0	0	0	0
Proteobacteria;Alphaproteobacteria;Sphingomonadales;Sphingomonadaceae;Sphingomonas;Sphingomonas aurantiaca	0	0	0	0.0757773	0.472066	0	0	0	0.465794	0	0	0.0355832	0.0300066	0.0401553	0	0	0.0642933	0	0.0991244	0.0933438	0.0791581	0.0862944	0	0.138936	0	0.119054	0.0457715	0.0309236	0	0.169662	0.242954	0.111867	0	0	0.0579726	0.279969	0	0.121556	0.249985	0.0473784	0.0239812	0	0.0102182	0	0	0.0681049	0	0	0
Proteobacteria;Alphaproteobacteria;Sphingomonadales;Sphingomonadaceae;Sphingomonas;__	0.403458	0	0	0.0307845	0	0	0	0.301234	0.440905	0.0844573	0	0.167908	0.0240053	0.0719449	0	0	0.141445	0.119685	0	0.0672624	0.117573	0.035533	0	0.0400536	0.0664678	0.164552	0.115954	0	0.126712	0.098355	0.0937917	0.0139833	0.103966	0.148401	0.0455499	0.373292	0.153028	0.253349	0.228381	0.0842283	0.178146	0	0	0.37193	0.149697	0.0205734	0	0	0
Proteobacteria;Alphaproteobacteria;Sphingomonadales;Sphingomonadaceae;Sphingopyxis;Ambiguous_taxa	0	0	0	0.0639371	0	0	0	0	0	0	0	0	0	0	0	0	0	0	0	0	0	0	0	0	0	0	0	0	0	0	0	0	0	0	0	0	0	0	0	0	0	0	0	0	0	0	0	0	0.0368535
Proteobacteria;Alphaproteobacteria;Sphingomonadales;Sphingomonadaceae;Sphingorhabdus;Ambiguous_taxa	0	0	0	0	0	0	0	0	0	0	0	0	0.0360079	0	0	0	0	0	0	0	0.00582045	0	0	0	0	0	0	0	0	0	0.0169503	0	0	0	0	0	0	0	0	0	0	0	0	0	0	0	0	0	0
Proteobacteria;Alphaproteobacteria;Sphingomonadales;Sphingomonadaceae;Sphingorhabdus;uncultured bacterium	0	0	0	0	0	0	0	0	0.124449	0	0	0	0	0	0	0	0	0	0.0165207	0	0	0	0	0	0	0	0	0	0	0	0	0	0	0	0	0	0	0	0	0	0	0	0	0	0	0	0	0	0
Proteobacteria;Alphaproteobacteria;Sphingomonadales;Sphingomonadaceae;Sphingorhabdus;__	0	0	0	0	0	0	0	0	0	0	0	0	0	0	0	0	0	0	0	0	0	0	0	0	0	0	0	0	0.0155157	0	0	0	0	0	0	0	0	0	0	0	0	0	0	0	0	0	0	0	0
Proteobacteria;Alphaproteobacteria;Sphingomonadales;Sphingomonadaceae;uncultured;Ambiguous_taxa	0	0	0	0	0	0	0	0	0	0	0	0	0	0	0	0	0	0	0	0	0	0	0	0	0	0	0	0	0	0	0	0	0	0	0	0	0	0	0	0	0	0	0	0	0	0	0	0	0
Proteobacteria;Alphaproteobacteria;Sphingomonadales;Sphingomonadaceae;__;__	0	0	0	0	0.160411	0	0	0	0	0	0	0	0	0	0	0	0	0	0	0	0	0	0	0	0	0	0	0	0	0	0	0	0	0	0	0	0	0	0	0	0	0	0	0	0	0	0	0	0
Proteobacteria;Alphaproteobacteria;Thalassobaculales;Nisaeaceae;OM75 clade;Ambiguous_taxa	0	0	0	0	0	0	0	0	0	0	0	0	0	0	0	0	0	0	0	0	0	0	0	0	0	0	0	0	0	0	0	0	0	0	0	0	0	0	0	0	0	0	0	0	0	0	0	0	0
Proteobacteria;Alphaproteobacteria;__;__;__;__	0	0	0	0	0	0	0	0	0	0	0	0	0	0	0	0	0.0330651	0	0	0	0	0.00676819	0	0	0	0	0	0	0	0	0	0	0	0	0	0.0111988	0	0	0.0154311	0	0.0137036	0	0	0	0	0	0	0	0
Proteobacteria;Deltaproteobacteria;Bdellovibrionales;Bacteriovoracaceae;Bacteriovorax;uncultured bacterium	0	0	0	0	0	0	0	0	0	0	0	0	0	0	0	0	0	0	0	0	0	0	0	0	0	0	0	0	0	0	0	0	0	0	0	0	0	0	0	0	0	0	0	0	0	0	0	0	0
Proteobacteria;Deltaproteobacteria;Bdellovibrionales;Bacteriovoracaceae;Peredibacter;uncultured bacterium	0	0	0	0	0	0	0	0	0	0	0	0	0	0	0	0	0	0.00844838	0	0	0	0	0	0	0	0.00303322	0	0	0	0	0	0	0	0	0	0.00622154	0	0	0	0	0	0	0	0	0	0	0	0	0
Proteobacteria;Deltaproteobacteria;Bdellovibrionales;Bdellovibrionaceae;Bdellovibrio;Ambiguous_taxa	0	0	0	0	0	0	0	0	0	0	0	0	0	0	0	0	0	0	0	0	0	0	0	0	0	0	0	0	0.00775785	0	0	0	0	0	0	0	0	0	0	0	0	0	0	0	0	0	0	0	0
Proteobacteria;Deltaproteobacteria;Bdellovibrionales;Bdellovibrionaceae;Bdellovibrio;__	0	0	0	0	0	0	0	0	0	0	0	0	0	0	0	0	0	0	0	0	0	0	0	0	0	0	0	0	0	0	0	0	0	0	0	0	0	0	0	0	0	0	0	0	0	0	0	0	0
Proteobacteria;Deltaproteobacteria;Bdellovibrionales;Bdellovibrionaceae;OM27 clade;uncultured bacterium	0	0	0	0	0	0	0	0	0	0	0	0	0	0	0	0	0	0	0	0	0	0	0	0	0	0	0	0	0	0	0	0	0	0	0	0	0	0	0	0	0	0	0	0	0	0	0	0	0
Proteobacteria;Deltaproteobacteria;Desulfobacterales;Desulfobulbaceae;uncultured;Ambiguous_taxa	0	0	0	0	0	0	0	0	0	0	0	0	0	0	0	0	0	0	0	0	0	0	0	0	0	0	0	0	0	0	0	0	0.025204	0	0	0	0	0	0	0	0	0	0	0	0	0	0	0	0
Proteobacteria;Deltaproteobacteria;Desulfuromonadales;Desulfuromonadaceae;Pelobacter;uncultured bacterium	0	0	0	0	0	0	0	0	0	0	0	0	0	0	0	0	0	0	0	0	0	0	0	0	0	0	0	0	0	0	0	0	0	0	0	0	0	0	0	0	0	0	0	0	0	0	0	0.00407598	0
Proteobacteria;Deltaproteobacteria;MBNT15;uncultured Anaeromyxobacter sp.;uncultured Anaeromyxobacter sp.;uncultured Anaeromyxobacter sp.	0	0	0	0	0	0	0	0	0	0	0	0	0	0	0	0	0	0	0	0	0	0	0	0	0	0	0	0	0	0	0	0	0	0	0	0	0	0	0	0	0	0	0	0	0	0	0	0	0
Proteobacteria;Deltaproteobacteria;Myxococcales;Nannocystaceae;Nannocystis;uncultured Myxococcales bacterium	0	0	0	0	0	0	0	0	0	0	0	0	0	0	0	0	0	0	0	0	0	0	0	0	0	0	0	0	0	0	0	0	0	0	0	0	0	0	0	0	0	0	0	0	0	0	0	0	0
Proteobacteria;Deltaproteobacteria;Myxococcales;P3OB-42;uncultured bacterium;uncultured bacterium	0	0	0	0	0	0	0	0	0	0	0	0.0044479	0	0	0	0	0	0.022529	0	0.0123543	0	0	0	0	0.0108203	0.0106163	0	0.00632529	0	0	0	0	0	0.0197868	0	0	0	0	0	0.0157928	0	0	0	0	0	0	0	0	0
Proteobacteria;Deltaproteobacteria;Myxococcales;Polyangiaceae;Pajaroellobacter;uncultured bacterium	0	0	0	0	0	0	0	0	0	0	0	0	0	0	0	0	0	0	0	0	0	0	0	0	0	0	0	0	0	0	0	0	0	0	0	0	0	0	0	0	0	0	0	0	0	0	0	0	0
Proteobacteria;Deltaproteobacteria;Oligoflexales;0319-6G20;uncultured Bacteriovorax sp.;uncultured Bacteriovorax sp.	0	0	0	0	0	0	0	0	0	0	0	0	0	0	0	0	0	0	0	0	0	0	0	0	0	0	0	0	0	0	0	0.00635607	0	0	0	0	0	0	0	0	0	0	0	0	0	0	0	0	0
Proteobacteria;Deltaproteobacteria;Oligoflexales;0319-6G20;uncultured bacterium;uncultured bacterium	0	0	0	0	0	0	0	0	0	0	0	0	0	0	0	0	0	0	0	0	0	0	0	0	0	0	0	0	0	0	0	0	0	0	0	0	0	0	0	0	0.167869	0	0	0	0	0	0	0	0
Proteobacteria;Deltaproteobacteria;Oligoflexales;0319-6G20;__;__	0	0	0	0	0	0	0	0	0	0	0	0	0	0	0	0	0	0	0	0	0	0	0	0	0	0	0	0	0	0	0	0	0	0	0	0	0	0	0	0	0	0	0	0	0	0	0	0	0
Proteobacteria;Deltaproteobacteria;Oligoflexales;Oligoflexaceae;Oligoflexus;__	0	0	0	0	0	0	0	0	0	0	0	0	0	0	0	0	0	0	0	0	0	0.0186125	0	0	0	0	0	0	0	0	0	0	0	0	0	0	0	0	0	0	0	0	0	0	0	0	0	0	0
Proteobacteria;Deltaproteobacteria;Oligoflexales;Oligoflexaceae;Silvanigrella;Proteobacteria bacterium Nonnen-W8red	0	0	0	0	0	0	0	0	0	0	0	0	0	0	0	0	0	0	0	0	0	0	0	0	0	0	0	0	0	0	0	0	0	0	0	0	0	0	0	0	0	0	0	0	0	0	0	0	0
Proteobacteria;Deltaproteobacteria;SAR324 clade(Marine group B);Ambiguous_taxa;Ambiguous_taxa;Ambiguous_taxa	0	0	0	0	0	0	0	0	0	0	0	0	0	0	0	0	0	0	0	0	0	0	0	0	0	0	0	0	0	0	0	0	0	0	0	0	0	0	0	0	0	0	0	0	0	0	0	0	0
Proteobacteria;Deltaproteobacteria;SAR324 clade(Marine group B);uncultured bacterium;uncultured bacterium;uncultured bacterium	0	0	0	0	0	0	0	0	0.0088892	0	0	0	0.162036	0	0	0	0	0	0	0.00549081	0	0	0	0.00250335	0	0	0.00457715	0	0	0	0	0	0	0	0	0	0.186619	0	0	0	0	0	0	0.0267789	0	0	0	0	0
Proteobacteria;Deltaproteobacteria;__;__;__;__	0	0	0	0	0	0	0	0	0.0408903	0	0	0	0	0	0	0	0	0	0	0	0	0	0	0	0	0	0	0	0	0	0	0	0	0	0.0234651	0	0	0	0	0	0	0	0	0	0	0	0	0	0
Proteobacteria;Gammaproteobacteria;Aeromonadales;Aeromonadaceae;Aeromonas;Aeromonas sp. 2e	0	0	0	0	0	0	0	0	0	0	0	0	0	0	0	0	0	0	0	0	0	0	0	0.0125167	0	0	0	0	0	0	0	0	0	0	0	0	0	0	0	0	0	0	0	0	0	0	0	0	0
Proteobacteria;Gammaproteobacteria;Aeromonadales;Aeromonadaceae;Aeromonas;__	0	0	0.0288627	0.058017	0	0	0	0.0785829	0.0995591	0.0921352	0	0.0400311	0.0140031	0.0769643	2.84681	0.994226	0	0.0161927	0	0.00960892	0	0	0	0	0	0.00909966	0	0	0	0	0.00904016	0.150003	0	0	0.0248454	0	0	0	0	0	0	0	0	0	0	0	0.0121762	0	0
Proteobacteria;Gammaproteobacteria;Aeromonadales;Aeromonadaceae;Oceanisphaera;Ambiguous_taxa	0	0	0	0	0	0	0	0	0	0	0.0179075	0	0	0.0150582	0	0	0	0	0	0	0	0	0	0	0.00772881	0	0	0	0	0	0	0	0	0	0	0	0	0	0	0	0	0	0	0	0	0	0	0	0
Proteobacteria;Gammaproteobacteria;Aeromonadales;Aeromonadaceae;Tolumonas;Ambiguous_taxa	0	0	0	0	0	0	0	0	0	0	0	0	0	0	0	0	0	0	0	0	0	0	0	0	0	0	0	0	0	0	0	0	0	0	0	0	0	0	0	0	0	0	0	0	0	0	0	0	0.0540518
Proteobacteria;Gammaproteobacteria;Alteromonadales;Alteromonadaceae;Glaciecola;__	0	0	0	0	0	0	0	0	0	0	0	0	0	0	0	0	0	0	0	0	0	0.0186125	0	0.0963789	0	0	0.00610286	0.0667669	0.990419	0	0.056501	0.00635607	0	0	0	0	0	0	0	0	0	0	0	0	0.0593625	0	0	0	0
Proteobacteria;Gammaproteobacteria;Alteromonadales;Alteromonadaceae;Paraglaciecola;Ambiguous_taxa	0	0	0	0	0	0	0	0	0	0	0	0	0	0	0	0	0	0	0	0	0	0	0	0	0	0	0	0	0	0	0	0	0	0	0	0	0	0	0	0	0	0	0	0	0	0	0	0	0
Proteobacteria;Gammaproteobacteria;Alteromonadales;Alteromonadaceae;Rheinheimera;__	0	0	0	0	0	0	0	0	0	0	0	0.0366952	0	0	0	0	0	0	0	0.00686351	0	0	0	0	0	0	0	0	0	0	0	0	0	0	0	0	0	0	0	0	0	0.00692713	0	0	0	0	0	0	0
Proteobacteria;Gammaproteobacteria;Alteromonadales;Colwelliaceae;Colwellia;Ambiguous_taxa	0	0	0	0	0	0	0	0	0	0	0	0	0	0	0	0	0	0	0	0	0.00931272	0	0	0.0425569	0	0	0	0	0.0918012	0	0	0	0	0	0	0	0	0	0	0	0	0	0	0	0	0	0	0	0
Proteobacteria;Gammaproteobacteria;Alteromonadales;Colwelliaceae;Colwellia;__	0	0	0	0	0	0	0	0	0	0.0179152	0	0	0	0	0	0	0	0	0	0	0	0	0	0	0	0	0	0	0	0	0.00678012	0	0	0	0	0	0	0.0230317	0	0	0	0	0	0	0	0	0	0	0
Proteobacteria;Gammaproteobacteria;Alteromonadales;Marinobacteraceae;Marinobacter;Ambiguous_taxa	0	0	0	0	0	0	0	0	0	0	0	0	0	0	0	0	0.0918476	0	0	0	0	0	0	0	0	0.00606644	0	0	0	0	0	0	0	0	0	0	0	0	0	0	0	0	0	0	0	0	0	0	0
Proteobacteria;Gammaproteobacteria;Alteromonadales;Moritellaceae;Moritella;Ambiguous_taxa	0.130791	0	0.106336	0	0	0	0	0	0	0	0	0.0856222	0	0	0	0	0.157978	0.152775	0	0.0905984	0.0558763	0	0	0	0.219498	0.0940299	0.0854401	0	0.0452541	0.103273	0.0666712	0.0495773	0	0.101407	0	0.0696812	0	0.172738	0	0.0815961	0.152452	0	0	0	0	0	0.0144592	0	0
Proteobacteria;Gammaproteobacteria;Alteromonadales;Moritellaceae;Moritella;uncultured bacterium	0	0.00706102	0	0	0	0	0	0.0589372	0	0.14844	0.149229	0.373624	0.346076	0.358051	0	0	0.310445	0.0478742	0.0495622	0.0150997	0.02561	0.0406091	0	0.0200268	0.119024	0.122845	0.109852	0	0.0103438	0.0885195	0.0485909	0.0457637	0	0	0	0	0	0.0332681	0.0493797	0	0	0	0	0	0	0	0	0	0
Proteobacteria;Gammaproteobacteria;Alteromonadales;Moritellaceae;Moritella;__	0.520949	0.164169	0.639536	1.17928	1.62244	0	0	1.30971	0.727137	0.723006	0.70287	0.689425	0.812179	0.548789	0	0	0.810096	0.962412	0.479101	0.82774	0.675172	0.856176	0	0.580777	1.00011	1.54922	1.27092	0.245983	0.384014	1.20485	1.42044	1.13774	0.374909	0.242388	0.270539	0.377025	0.11757	0.420969	0.311709	0.218467	0.277497	0	0.0122618	0.370442	0.229707	0	0.0555539	0.00679329	0.114655
Proteobacteria;Gammaproteobacteria;Alteromonadales;Pseudoalteromonadaceae;Pseudoalteromonas;Ambiguous_taxa	0	0	0	0	0	0	0	0	0	0	0	0	0	0	0	0	0	0	0	0	0	0	0	0	0	0	0	0	0	0	0	0	0	0	0	0	0	0	0	0	0	0	0	0	0	0	0	0	0
Proteobacteria;Gammaproteobacteria;Alteromonadales;Pseudoalteromonadaceae;Pseudoalteromonas;__	0	0	0	0	0	0	0	0	0	0.0115169	0	0	0	0.0200776	0	0	0	0	0	0	0.0197895	0.0186125	0	0.0713454	0	0.0106163	0.01068	0	0.0594769	0.127862	0	0	0	0	0	0	0	0	0	0	0	0	0	0	0	0.00780369	0	0	0
Proteobacteria;Gammaproteobacteria;Alteromonadales;Psychromonadaceae;Psychromonas;Ambiguous_taxa	0	0	0	0	0	0	0	0	0	0	0	0	0	0	0	0	0	0	0	0	0	0	0	0	0	0.0265407	0	0	0	0	0	0	0	0	0	0	0	0	0	0	0	0	0	0	0	0	0	0	0
Proteobacteria;Gammaproteobacteria;Alteromonadales;Psychromonadaceae;Psychromonas;Psychromonas sp. 4SWWS1-12	0	0	0	0.0224964	0	0	0	0	0	0	0	0	0	0	0	0	0	0	0	0	0.012805	0	0	0	0	0	0	0	0	0	0	0	0	0	0	0	0	0	0	0	0	0	0	0	0	0	0	0	0.0180173
Proteobacteria;Gammaproteobacteria;Alteromonadales;Psychromonadaceae;Psychromonas;Psychromonas sp. IC004	0.312569	0	0	0	0	0	0	0	0	0	0	0	0.00600132	0	0	0	0	0	0	0	0	0	0	0	0	0	0	0	0	0	0	0	0	0	0	0	0	0	0	0	0	0	0	0	0	0	0	0	0
Proteobacteria;Gammaproteobacteria;Alteromonadales;Psychromonadaceae;Psychromonas;uncultured bacterium	0	0	0	0	0	0	0	0	0	0	0	0	0	0	0	0	0	0	0	0.0164724	0	0	0	0.0112651	0.0200949	0.00530814	0	0.00773091	0.00646488	0	0	0	0	0	0	0	0	0	0	0	0	0	0	0	0	0	0	0	0
Proteobacteria;Gammaproteobacteria;Alteromonadales;Psychromonadaceae;Psychromonas;uncultured gamma proteobacterium	0	0	0	0	0	0	0	0	0	0.0652625	0.0208921	0	0	0	0	0	0	0	0.0472021	0	0	0.0203046	0	0.00375502	0	0.0136495	0.0747601	0	0	0	0.0316406	0	0.0976655	0	0	0	0	0.0115159	0	0.0315856	0	0	0	0	0	0	0	0	0
Proteobacteria;Gammaproteobacteria;Alteromonadales;Psychromonadaceae;Psychromonas;__	0	0	0	0.0307845	0	0	0	0.186634	0	0.0499066	0.0313381	0.0778383	0	0.105408	0	0	0	0.044354	0	0	0.0360868	0	0	0.0162718	0.0463729	0.0758305	0.0656058	0	0.0245665	0.0540953	0.0372907	0.0343228	0	0.0222601	0.013803	0.048528	0	0	0.00925869	0.0473784	0	0	0	0.0267789	0	0	0	0	0
Proteobacteria;Gammaproteobacteria;Alteromonadales;Shewanellaceae;Psychrobium;uncultured bacterium	0	0	0	0	0	0	0	0	0	0	0	0	0	0	0	0	0	0	0	0	0	0	0	0	0	0	0	0	0	0	0	0	0	0	0	0	0	0	0	0	0	0	0	0	0	0	0	0	0
Proteobacteria;Gammaproteobacteria;Alteromonadales;Shewanellaceae;Shewanella;Ambiguous_taxa	0	0	0	0	0	0	0	0	0	0	0.0596917	0.103414	0	0	2.96652	3.1085	0	0	0	0	0.0302663	0.0592217	0	0.0162718	0.0881085	0	0	0	0	0.039342	0.0440708	0	0	0	0	0	0	0.0447839	0	0	0	0	0	0	0	0	0	0	0
Proteobacteria;Gammaproteobacteria;Alteromonadales;Shewanellaceae;Shewanella;Shewanella algae	0.580802	0	0	0.0165763	0	0	0	0.255394	0	0	0	0.402535	0.660145	0	0	0	0.0183695	0	0.068443	0	0	0	0	0.0450603	0	0.0106163	0.105274	0	0.0788715	0	0	0.500858	0	0	0	0	0.968555	0	0	0.623816	0	0	0	0	0	0.0688143	0	0.0122279	0
Proteobacteria;Gammaproteobacteria;Alteromonadales;Shewanellaceae;Shewanella;uncultured bacterium	0	0	0	0	0	0	0	0	0	0.0191948	0.134306	0.093406	0.068015	0.0267702	2.8205	3.22274	0.25901	0.253452	0.127446	0.280031	0.26192	0.209814	0	0.0913722	0.479186	0.505031	0.398212	0.0843372	0.14352	0.484398	0.423758	0.361025	0	0	0	0	0	0	0	0	0	0	0	0	0	0	0	0	0.0884485
Proteobacteria;Gammaproteobacteria;Alteromonadales;Shewanellaceae;Shewanella;uncultured gamma proteobacterium	0	0	0	0.0106562	0	0	0	0	0.0177784	0.044788	0.00447688	0.0589347	0.0220048	0	0	0	0.213086	0.109829	0.0519223	0.0480446	0.0221177	0.0846024	0	0.0751004	0.120569	0.131187	0.147994	0	0.0116368	0.154909	0.103962	0.264412	0.0598595	0	0	0.0124431	0	0.0409453	0.0246898	0	0	0	0	0	0	0	0	0	0
Proteobacteria;Gammaproteobacteria;Alteromonadales;Shewanellaceae;Shewanella;__	0	0.0291267	0.0288627	0.346918	0.197076	0	0	0.612292	0.332456	0.198347	0.119383	0.333593	0.146032	0.501941	0.499901	0.105752	0	0.0767395	0.0519223	0.0219632	0	0.0321489	0	0.0112651	0.00463729	0.0705224	0.0686572	0.0070281	0.0181017	0.019671	0.0937917	0.148732	0	0	0.0207045	0	0	0.0537407	0	0.0315856	0	0	0	0	0.0206478	0	0	0	0.0483191
Proteobacteria;Gammaproteobacteria;Alteromonadales;__;__;__	0	0	0	0	0	0	0	0	0	0	0	0	0	0	0	0	0	0	0	0	0	0	0	0	0	0	0	0	0.00905083	0	0	0	0	0	0	0	0	0	0	0	0	0	0	0	0	0	0	0	0
Proteobacteria;Gammaproteobacteria;Betaproteobacteriales;Aquaspirillaceae;Rivicola;uncultured bacterium	0	0	0	0	0	0	0	0	0	0	0	0	0	0	0	0	0	0	0	0	0	0	0	0	0	0	0	0	0	0	0	0	0	0	0	0	0	0	0	0	0	0	0	0	0	0	0	0	0
Proteobacteria;Gammaproteobacteria;Betaproteobacteriales;Burkholderiaceae;Ambiguous_taxa;__	0	0	0	0	0	0	0	0	0	0	0	0	0	0	0	0	0	0	0	0	0	0	0	0	0	0	0	0	0	0.0344243	0	0	0	0	0	0	0	0	0	0	0	0	0	0	0	0	0	0	0
Proteobacteria;Gammaproteobacteria;Betaproteobacteriales;Burkholderiaceae;AAP99;uncultured bacterium	0	0	0	0	0	0	0	0	0	0	0	0	0	0	0	0	0	0	0	0	0	0	0	0	0	0	0	0	0	0	0	0	0	0	0	0	0	0	0	0	0	0	0	0	0	0	0	0	0
Proteobacteria;Gammaproteobacteria;Betaproteobacteriales;Burkholderiaceae;Achromobacter;__	0.144092	0	0.0668398	0	0	0	0	0	0	0	0	0	0	0	0	0	0	0	0.00708031	0.0123543	0	0	0	0	0	0	0	0.00210843	0.0116368	0	0	0.0241531	0	0	0	0	0	0	0	0	0.0171294	0	0	0	0.258098	0	0	0	0
Proteobacteria;Gammaproteobacteria;Betaproteobacteriales;Burkholderiaceae;Acidovorax;__	0	0	0	0	0.105413	0	0	0.186634	0	0	0	0	0	0	0	0	0	0.0021121	0	0.0329449	0	0	0	0	0.00463729	0	0	0.00351405	0.0155157	0	0	0	0	0	0	0	0	0	0.0123449	0	0	0	0	0	0	0	0	0	0.0270259
Proteobacteria;Gammaproteobacteria;Betaproteobacteriales;Burkholderiaceae;Alcaligenes;Ambiguous_taxa	0	0	0	0	0	0	0	0	0	0	0	0	0	0	0	0	0	0	0	0	0	0	0	0	0	0	0	0	0	0	0.0101702	0.035594	0	0	0	0	0	0.0268704	0	0.0473784	0	0	0	0	0	0	0	0	0
Proteobacteria;Gammaproteobacteria;Betaproteobacteriales;Burkholderiaceae;Alicycliphilus;Ambiguous_taxa	0	0	0	0	0	0	0	0	0	0	0	0	0	0	0	0	0	0	0	0	0	0	0	0	0	0	0	0	0	0	0	0	0	0	0	0.00871015	0	0	0	0	0	0	0	0	0	0	0	0	0
Proteobacteria;Gammaproteobacteria;Betaproteobacteriales;Burkholderiaceae;Aquabacterium;Ambiguous_taxa	0	0	0	0	0	0	0	0	0	0	0	0	0	0	0	0	0	0	0	0	0	0	0	0	0	0	0	0	0	0	0	0	0	0	0	0	0	0	0	0	0	0	0	0	0	0	0	0	0
Proteobacteria;Gammaproteobacteria;Betaproteobacteriales;Burkholderiaceae;Brachymonas;Brachymonas sp. feline oral taxon 160	0	0	0	0	0	0	0	0	0	0	0	0	0	0	0	0	0	0	0	0	0	0.00507614	0	0.0050067	0	0	0	0	0	0	0	0	0	0	0	0	0	0	0	0	0	0	0	0	0	0	0	0	0
Proteobacteria;Gammaproteobacteria;Betaproteobacteriales;Burkholderiaceae;Burkholderia-Caballeronia-Paraburkholderia;uncultured beta proteobacterium	0.183995	0	0.398001	0.055649	0.0824969	0	0	0	0.0835585	0.0601438	0	0	0	0	0	0	0	0.066883	0.0330415	0.00549081	0	0	0	0.0162718	0	0.00985797	0	0	0	0.0221299	0.0135602	0.0114409	0.050408	0.0742005	0	0	0	0.0230317	0.0308623	0.102653	0.306617	0	0	0.0818245	0.100658	0.0156074	0	0.00679329	0
Proteobacteria;Gammaproteobacteria;Betaproteobacteriales;Burkholderiaceae;Burkholderia-Caballeronia-Paraburkholderia;__	0.387941	0	0.1671	0.0343366	0	0	0	0.134246	0	0	0.0313381	0.144557	0	0.00669254	0	0	0.0293912	0	0	0	0	0.0507614	0	0	0	0	0.0411943	0.00632529	0.0051719	0	0	0	0	0	0.13803	0.129408	0	0	0	0	0	0	0	0.0327298	0	0	0	0	0.0311208
Proteobacteria;Gammaproteobacteria;Betaproteobacteriales;Burkholderiaceae;Comamonas;Ambiguous_taxa	0	0	0	0	0	0	0	0	0	0.0179152	0	0	0	0	0	0	0.0330651	0	0	0.0123543	0	0	0	0.0125167	0.00927457	0.0379153	0.0091543	0	0	0.0762251	0.0226004	0.00762728	0	0	0	0	0	0.00767725	0.0216036	0	0	0	0	0.0282667	0	0	0	0	0
Proteobacteria;Gammaproteobacteria;Betaproteobacteriales;Burkholderiaceae;Comamonas;Comamonas terrigena	0	0	0	0	0	0	0	0	0	0	0	0	0	0	0	0	0	0	0	0	0	0	0	0	0	0	0	0	0	0	0	0	0	0	0	0	0	0	0	0	0	0	0	0	0	0	0	0	0
Proteobacteria;Gammaproteobacteria;Betaproteobacteriales;Burkholderiaceae;Comamonas;uncultured Comamonas sp.	0	0	0	0	0	0	0	0	0	0	0	0	0	0	0	0	0	0	0	0	0	0.0203046	0	0	0.0154576	0	0	0	0	0	0	0	0	0	0	0	0	0	0	0	0	0	0	0	0	0	0.0327235	0	0
Proteobacteria;Gammaproteobacteria;Betaproteobacteriales;Burkholderiaceae;Comamonas;uncultured bacterium	0	0	0	0	0	0	0	0	0	0	0	0	0	0	0	0	0	0.0492822	0	0	0	0	0	0	0	0	0	0	0	0.0319654	0.0429408	0.0216106	0	0	0	0	0	0	0	0	0	0	0	0.00743859	0	0	0	0	0
Proteobacteria;Gammaproteobacteria;Betaproteobacteriales;Burkholderiaceae;Comamonas;__	0.161827	0.0185352	0.291665	0.0970897	0.490398	0	0	0.130971	0.0266676	0	0.0462611	0	0.124027	0.0485209	0	0	0	0.0295693	0	0.0398084	0.00931272	0.0101523	0	0.0362985	0	0.0166827	0	0	0	0	0.00791014	0.0317803	0.094515	0	0.0634938	0	0.00746478	0	0	0.0894925	0.234673	0	0.00919634	0.010414	0.0258098	0	0	0	0.00655174
Proteobacteria;Gammaproteobacteria;Betaproteobacteriales;Burkholderiaceae;Curvibacter;__	0	0	0	0	0	0	0	0	0	0	0	0	0	0	0	0	0	0	0	0	0	0	0	0	0	0	0	0	0	0	0	0	0	0	0	0	0	0	0	0	0	0	0	0	0.0206478	0	0	0	0
Proteobacteria;Gammaproteobacteria;Betaproteobacteriales;Burkholderiaceae;Delftia;__	0	0	0	0	0	0	0	0	0	0	0	0	0	0	0	0	0	0	0	0	0	0	0	0	0	0	0	0.00632529	0	0	0	0	0	0	0	0	0	0	0	0	0	0	0	0	0	0	0	0	0
Proteobacteria;Gammaproteobacteria;Betaproteobacteriales;Burkholderiaceae;Duganella;uncultured bacterium	0	0	0	0	0	0	0	0	0	0	0	0	0	0	0	0	0	0	0	0	0	0	0	0	0.0494644	0.04474	0	0	0	0	0	0	0	0	0	0	0	0	0.0833282	0	0	0	0	0	0	0	0	0	0
Proteobacteria;Gammaproteobacteria;Betaproteobacteriales;Burkholderiaceae;GKS98 freshwater group;__	0	0	0.243054	0	0	0	0	0	0	0	0	0	0	0	0	0	0	0	0	0	0	0	0	0	0	0	0	0	0	0	0	0	0	0	0	0	0	0	0	0	0	0	0	0	0	0	0	0	0
Proteobacteria;Gammaproteobacteria;Betaproteobacteriales;Burkholderiaceae;Hydrogenophaga;__	0	0	0	0	0	0	0	0	0	0	0	0	0	0	0	0	0	0	0	0	0	0	0	0	0	0	0	0	0	0	0	0	0	0	0	0	0	0	0	0	0	0	0	0	0	0	0	0	0
Proteobacteria;Gammaproteobacteria;Betaproteobacteriales;Burkholderiaceae;Ideonella;Ambiguous_taxa	0	0	0	0	0	0	0	0	0	0	0	0	0	0	0	0	0	0	0	0	0	0	0	0	0	0	0	0	0	0	0	0	0	0	0	0	0	0	0	0	0	0	0	0	0	0	0	0	0.0147414
Proteobacteria;Gammaproteobacteria;Betaproteobacteriales;Burkholderiaceae;Inhella;Ambiguous_taxa	0	0	0	0	0	0	0	0	0.174228	0	0	0	0	0	0	0	0	0	0	0	0	0	0	0	0	0	0	0	0	0	0	0	0	0	0	0	0	0	0	0	0.123332	0	0	0	0	0	0	0	0
Proteobacteria;Gammaproteobacteria;Betaproteobacteriales;Burkholderiaceae;Inhella;__	0	0	0	0	0	0	0	0	0	0	0	0	0	0	0	0	0	0	0	0	0	0	0	0	0	0	0	0	0	0	0.0113002	0	0	0	0	0	0	0	0	0	0	0	0	0	0	0	0	0	0
Proteobacteria;Gammaproteobacteria;Betaproteobacteriales;Burkholderiaceae;Janthinobacterium;__	0	0	0	0	0	0	0	0	0	0.00639828	0	0	0	0	0	0	0.0918476	0	0	0.0205905	0	0	0	0	0	0	0	0	0	0	0.0361606	0	0	0	0	0	0	0	0	0	0	0	0	0	0	0.0113508	0	0	0
Proteobacteria;Gammaproteobacteria;Betaproteobacteriales;Burkholderiaceae;Kerstersia;Ambiguous_taxa	0	0	0	0	0	0	0	0	0	0	0	0.131213	0	0	0	0	0	0	0	0	0.0162973	0	0	0	0	0	0	0	0	0	0	0	0	0	0	0	0	0	0	0	0	0	0	0	0	0	0	0	0
Proteobacteria;Gammaproteobacteria;Betaproteobacteriales;Burkholderiaceae;Leptothrix;uncultured bacterium	0	0	0	0	0	0	0	0	0	0	0	0	0	0	0	0	0	0	0	0	0	0	0	0	0	0	0	0	0	0	0	0	0	0	0	0	0	0	0	0	0	0	0	0	0	0	0	0	0
Proteobacteria;Gammaproteobacteria;Betaproteobacteriales;Burkholderiaceae;Leptothrix;__	0	0	0	0	0	0	0	0	0	0	0	0	0	0	0	0	0	0	0	0	0	0	0	0	0	0	0	0	0	0	0	0	0	0	0	0	0	0	0	0	0	0	0	0	0	0	0	0	0
Proteobacteria;Gammaproteobacteria;Betaproteobacteriales;Burkholderiaceae;Limnohabitans;Ambiguous_taxa	0.130791	0	0	0	0	0	0	0	0	0	0	0	0.0480106	0	0	0	0	0	0	0	0.012805	0	0	0.0100134	0	0	0	0	0	0	0	0	0	0	0.0303666	0	0	0.0230317	0	0	0.184998	0	0.00510908	0.0446316	0	0	0	0	0.0131035
Proteobacteria;Gammaproteobacteria;Betaproteobacteriales;Burkholderiaceae;Limnohabitans;metagenome	0	0	0	0	0	0	0	0	0	0.0140762	0	0	0	0	0	0	0.0257173	0.0204169	0	0	0	0	0	0	0	0	0.0335658	0	0	0	0	0	0	0	0	0	0	0	0	0	0	0	0	0	0	0	0.0106542	0	0
Proteobacteria;Gammaproteobacteria;Betaproteobacteriales;Burkholderiaceae;Limnohabitans;uncultured bacterium	0	0	0	0	0	0	0	0	0	0	0	0	0	0	0	0	0	0	0	0	0	0	0	0	0	0	0	0	0	0	0	0	0	0	0	0	0	0	0	0	0	0	0	0	0	0	0	0	0
Proteobacteria;Gammaproteobacteria;Betaproteobacteriales;Burkholderiaceae;Limnohabitans;__	0	0	0.1671	0	0	0	0	0	0	0	0	0	0	0	0	0	0	0	0	0	0	0	0	0.0425569	0	0	0	0	0	0	0	0	0.0283545	0	0.041409	0	0	0	0	0	0	0	0	0	0	0	0	0	0
Proteobacteria;Gammaproteobacteria;Betaproteobacteriales;Burkholderiaceae;Massilia;uncultured Massilia sp.	0	0	0	0	0	0	0	0	0	0	0	0	0	0	0	0	0	0	0	0	0.012805	0	0	0	0	0	0	0	0	0	0	0	0	0	0	0	0	0	0	0	0	0	0	0	0	0	0	0	0
Proteobacteria;Gammaproteobacteria;Betaproteobacteriales;Burkholderiaceae;Massilia;__	0	0	0	0.0899856	0	0	0	0	0.620467	0.0601438	0.0567071	0.0433671	0	0.0702717	0	0	0.135934	0.0302734	0.0283213	0.0631443	0.0814863	0.0389171	0	0.0475636	0.0525559	0.0583895	0.12816	0.0161646	0.00646488	0.0442598	0.0723213	0.0559334	0.0850635	0.0865672	0.133889	0.140607	0.0839787	0.175297	0.0216036	0.0579069	0.17472	0.0277085	0	0.211256	0	0	0	0	0.0466811
Proteobacteria;Gammaproteobacteria;Betaproteobacteriales;Burkholderiaceae;Methylibium;__	0	0	0	0	0	0	0	0	0	0	0	0	0	0	0	0	0	0	0	0	0	0	0	0	0	0	0	0	0	0	0	0	0	0	0	0	0	0	0	0	0	0	0	0	0	0	0	0	0
Proteobacteria;Gammaproteobacteria;Betaproteobacteriales;Burkholderiaceae;Oligella;Ambiguous_taxa	0	0	0	0.106562	0	0	0	0	0	0	0.0208921	0	0	0	0	0	0.0404129	0	0	0	0	0	0	0	0	0	0	0	0	0	0.0056501	0	0	0	0	0	0	0	0	0	0	0	0	0	0	0	0	0	0
Proteobacteria;Gammaproteobacteria;Betaproteobacteriales;Burkholderiaceae;Ottowia;uncultured bacterium	0	0	0	0	0	0	0	0	0	0	0	0	0	0	0	0	0	0	0	0	0	0	0	0	0	0	0	0	0	0	0	0	0	0	0	0	0	0	0	0	0	0	0	0.047607	0	0	0	0	0
Proteobacteria;Gammaproteobacteria;Betaproteobacteriales;Burkholderiaceae;Ottowia;__	0	0	0	0	0	0	0	0	0	0	0	0	0	0	0	0	0	0	0	0	0	0	0	0	0.0340068	0	0	0	0	0	0	0	0	0	0	0	0	0	0	0	0	0	0	0	0	0	0	0	0
Proteobacteria;Gammaproteobacteria;Betaproteobacteriales;Burkholderiaceae;Paenalcaligenes;Ambiguous_taxa	0	0	0	0	0	0	0	0.0360172	0	0.00383897	0.0149229	0	0.00800176	0	0	0	0	0	0	0	0.0244459	0.0287648	0	0.0125167	0.0525559	0.0667309	0.0091543	0	0.00646488	0.0221299	0.0339006	0.0165258	0.0598595	0.0544137	0.069015	0.00995446	0	0.0716543	0	0.0500105	0	0	0	0	0	0.0205734	0	0	0
Proteobacteria;Gammaproteobacteria;Betaproteobacteriales;Burkholderiaceae;Pelomonas;uncultured bacterium	0	0	0	0	0	0	0	0	0.0515574	0	0	0	0	0	0	0	0	0	0	0	0	0	0	0	0	0	0	0	0	0	0	0	0	0	0	0	0.0186619	0	0	0	0	0	0	0	0	0	0.00837113	0	0
Proteobacteria;Gammaproteobacteria;Betaproteobacteriales;Burkholderiaceae;Pelomonas;__	0	0	0	0	0	0	0	0	0.0604466	0	0	0	0	0	0	0	0	0	0	0	0	0	0	0	0	0	0	0	0	0	0	0	0	0	0	0	0	0	0	0	0	0	0	0	0	0	0	0	0
Proteobacteria;Gammaproteobacteria;Betaproteobacteriales;Burkholderiaceae;Polaromonas;__	0	0	0.677513	0	0	0	0	0.0425657	0	0	0	0	0	0	0	0	0	0.0394258	0	0	0	0	0	0	0	0.00758305	0	0.00632529	0	0	0	0	0	0	0	0	0	0	0	0.0105285	0	0	0	0	0	0	0	0	0
Proteobacteria;Gammaproteobacteria;Betaproteobacteriales;Burkholderiaceae;Polynucleobacter;__	0.21503	0	0.144313	0.0485448	0	0	0	0.111326	0.0355568	0	0	0	0.260057	0	0	0	0	0.088004	0	0.00960892	0.0500559	0	0	0	0	0	0.0579772	0.00773091	0.0155157	0	0	0.0216106	0.025204	0.0469936	0.0220848	0.0535052	0.067183	0	0	0.0552748	0	0	0	0.010414	0	0	0.00989315	0	0
Proteobacteria;Gammaproteobacteria;Betaproteobacteriales;Burkholderiaceae;Pusillimonas;Ambiguous_taxa	0	0	0	0	0	0	0	0	0	0	0	0	0	0	0	0	0	0	0	0	0	0	0	0	0	0	0	0	0	0	0	0	0.0409565	0	0	0	0	0	0	0	0	0	0	0	0	0	0	0	0
Proteobacteria;Gammaproteobacteria;Betaproteobacteriales;Burkholderiaceae;Pusillimonas;uncultured bacterium	0	0	0	0	0	0	0	0	0	0	0	0	0	0	0	0	0	0	0	0	0	0	0	0	0	0.0197159	0	0	0	0	0	0	0	0	0	0	0	0	0	0	0	0	0	0	0	0	0	0	0
Proteobacteria;Gammaproteobacteria;Betaproteobacteriales;Burkholderiaceae;RS62 marine group;__	0	0	0	0	0	0	0	0	0	0	0	0	0	0	0	0	0	0	0.0165207	0	0	0	0	0.0350469	0	0	0	0	0.0116368	0	0	0	0	0	0	0	0	0	0	0	0	0	0	0	0	0	0	0	0
Proteobacteria;Gammaproteobacteria;Betaproteobacteriales;Burkholderiaceae;Rhodoferax;uncultured Comamonadaceae bacterium	0	0	0	0	0	0	0	0	0	0	0.138783	0	0	0	0	0	0	0	0	0	0	0	0	0	0	0	0	0	0	0	0	0	0	0	0	0	0	0	0	0	0	0	0	0	0	0	0.00304405	0	0
Proteobacteria;Gammaproteobacteria;Betaproteobacteriales;Burkholderiaceae;Rhodoferax;__	0	0	0	0.0201283	0.0320821	0	0	0.121149	0	0	0	0	0	0.0769643	0	0	0	0	0	0	0	0	0	0	0	0	0	0	0	0	0	0	0	0	0	0	0	0	0	0	0	0	0	0	0	0	0	0	0
Proteobacteria;Gammaproteobacteria;Betaproteobacteriales;Burkholderiaceae;Sphaerotilus;Ambiguous_taxa	0	0	0	0	0	0	0	0	0	0	0	0	0	0	0	0	0	0	0	0.0123543	0	0	0	0	0	0	0	0	0	0	0	0	0	0	0.0082818	0.0497723	0	0.0281499	0	0	0	0	0	0	0	0	0	0	0
Proteobacteria;Gammaproteobacteria;Betaproteobacteriales;Burkholderiaceae;Sutterella;Ambiguous_taxa	0	0	0	0	0	0	0	0	0	0.0153559	0	0	0	0.128831	0	0	0.0349021	0	0	0.0233359	0	0.106599	0	0.108896	0.064922	0.0561146	0.0762858	0	0.0349103	0.0172121	0.0847515	0.0190682	0	0	0	0	0	0	0	0	0	0	0	0	0	0	0	0	0
Proteobacteria;Gammaproteobacteria;Betaproteobacteriales;Burkholderiaceae;Tepidimonas;Ambiguous_taxa	0	0	0	0	0	0	0	0	0	0	0.0179075	0	0	0	0	0	0	0	0	0	0	0	0	0	0	0	0	0	0	0	0	0	0	0	0	0	0	0	0	0	0	0	0	0	0	0	0	0	0
Proteobacteria;Gammaproteobacteria;Betaproteobacteriales;Burkholderiaceae;Undibacterium;__	0	0	0	0	0	0	0	0	0	0	0	0	0	0	0	0	0	0	0	0	0	0	0	0	0	0	0	0	0	0	0	0	0	0	0	0	0	0	0	0	0	0	0	0	0	0	0	0	0
Proteobacteria;Gammaproteobacteria;Betaproteobacteriales;Burkholderiaceae;Variovorax;__	0	0	0	0	0	0	0	0	0	0	0	0	0	0	0	0	0	0.0373137	0.0377617	0	0	0	0	0	0	0.0106163	0	0	0	0	0.0372907	0	0	0	0	0	0	0	0	0	0	0	0	0	0	0	0.0426167	0	0
Proteobacteria;Gammaproteobacteria;Betaproteobacteriales;Burkholderiaceae;Verticia;Ambiguous_taxa	0	0	0	0	0	0	0	0	0	0	0	0	0	0	0	0	0	0.0295693	0	0	0	0	0	0	0	0	0	0	0	0	0.0056501	0	0.0157525	0	0	0	0	0	0	0	0	0	0	0	0	0	0	0	0
Proteobacteria;Gammaproteobacteria;Betaproteobacteriales;Burkholderiaceae;Xylophilus;Ambiguous_taxa	0	0	0	0	0	0	0	0	0.00711136	0	0.025369	0	0	0	0	0	0	0	0	0	0	0	0	0	0	0	0	0	0	0	0.0113002	0.0152546	0	0.0247335	0	0	0	0.00895679	0.0277761	0	0	0	0	0	0	0	0	0	0
Proteobacteria;Gammaproteobacteria;Betaproteobacteriales;Burkholderiaceae;uncultured;uncultured bacterium	0	0	0	0	0	0	0	0	0	0	0	0	0	0	0	0	0	0	0	0	0	0	0	0	0	0	0	0	0	0	0.00339006	0	0	0	0	0	0	0	0	0	0	0	0	0	0	0	0	0	0
Proteobacteria;Gammaproteobacteria;Betaproteobacteriales;Burkholderiaceae;__;__	0	0	0	0	0.270407	0	0	0	0	0	0	0	0.0100022	0.0184045	0	0	0	0.00844838	0	0	0.00814863	0.0186125	0	0.00876172	0.0278237	0.00454983	0	0	0	0.0319654	0.0305105	0.0279667	0	0.0692538	0	0	0	0	0	0.0658033	0	0	0	0.0490947	0	0	0	0.00407598	0
Proteobacteria;Gammaproteobacteria;Betaproteobacteriales;Chitinibacteraceae;Deefgea;Ambiguous_taxa	2.29439	0	12.6191	0	0.17416	0.0349642	34.1696	0.392914	0	0.0217542	0	0.0177916	0	0.0585598	77.9123	79.8515	0	0	0	0	0	0	0.00261172	0	0	0	0	0	0	0	0.00791014	0.152546	0	0	0	0	0	0	0	0.0447463	0	0	0	0	0	0	0	0	0
Proteobacteria;Gammaproteobacteria;Betaproteobacteriales;Chromobacteriaceae;Aquitalea;Ambiguous_taxa	0	0	0	0	0	0	0	0	0	0	0	0	0	0	0	0	0	0	0	0	0	0	0	0	0	0	0	0	0	0	0	0	0	0	0	0	0	0	0	0	0	0	0	0	0	0	0	0	0
Proteobacteria;Gammaproteobacteria;Betaproteobacteriales;Chromobacteriaceae;Gulbenkiania;Ambiguous_taxa	0	0	0	0	0	0	0	0.0425657	0	0	0	0	0	0	0	0	0	0	0	0	0	0.0101523	0	0	0	0	0	0.0070281	0	0	0	0	0	0	0	0	0	0	0	0	0	0	0	0	0	0	0	0	0
Proteobacteria;Gammaproteobacteria;Betaproteobacteriales;Chromobacteriaceae;Paludibacterium;uncultured bacterium	0	0	0	0	0.105413	0	0	0	0	0	0	0	0	0	0	0	0	0	0	0	0	0	0	0	0	0	0	0	0	0	0	0	0	0	0	0	0	0	0	0	0	0	0	0	0	0	0	0	0
Proteobacteria;Gammaproteobacteria;Betaproteobacteriales;Chromobacteriaceae;Vogesella;Ambiguous_taxa	0	0	0	0	0	0	0	0	0	0	0	0	0	0	0	0	0	0	0	0	0	0	0	0	0	0	0	0	0	0	0	0	0	0	0	0	0	0	0	0	0	0	0	0	0	0	0	0	0
Proteobacteria;Gammaproteobacteria;Betaproteobacteriales;Chromobacteriaceae;Vogesella;__	0	0	0	0	0	0	0	0	0	0	0	0	0	0	0	0	0	0	0	0	0	0	0	0	0	0	0	0	0	0	0	0	0	0	0	0	0	0	0	0	0	0	0	0	0	0	0	0	0
Proteobacteria;Gammaproteobacteria;Betaproteobacteriales;Chromobacteriaceae;__;__	0	0	0	0	0	0	0	0	0	0	0	0	0	0	0	0	0	0	0	0	0	0	0	0	0	0	0	0	0	0	0	0	0	0	0	0	0	0	0	0	0	0	0	0	0.0232288	0	0	0	0
Proteobacteria;Gammaproteobacteria;Betaproteobacteriales;Gallionellaceae;Candidatus Nitrotoga;Ambiguous_taxa	0	0	0	0	0	0	0	0	0	0	0	0	0	0	0	0	0	0	0	0	0	0	0	0	0	0	0	0	0	0	0	0	0	0	0	0	0	0	0	0	0	0	0	0	0	0	0	0	0
Proteobacteria;Gammaproteobacteria;Betaproteobacteriales;Hydrogenophilaceae;Tepidiphilus;Ambiguous_taxa	0	0	0	0	0	0	0	0	0	0	0	0	0	0	0	0	0	0	0	0	0	0	0	0.0100134	0.0293695	0.017441	0.0534001	0	0	0.0344243	0	0	0.103966	0.0445203	0.27606	0.31481	0.0298591	0.124116	0.333313	0.0236892	0	0.00865891	0	0.0937263	0.110982	0	0	0	0.0892674
Proteobacteria;Gammaproteobacteria;Betaproteobacteriales;Hydrogenophilaceae;Tepidiphilus;__	0	0	0	0	0	0	0	0.193183	0	0.0358304	0	0	0	0	0	0	0	0	0.0212409	0	0	0	0	0	0	0	0	0	0	0	0.00904016	0.0572046	0	0	0	0	0	0	0	0	0.0188424	0	0	0	0	0	0	0	0
Proteobacteria;Gammaproteobacteria;Betaproteobacteriales;Hydrogenophilaceae;Thiobacillus;__	0	0	0	0	0	0	0	0	0	0	0	0	0	0	0	0	0	0	0	0	0	0	0	0	0	0	0	0	0	0	0	0	0	0	0	0	0	0	0	0	0	0	0	0	0	0	0	0	0.00409484
Proteobacteria;Gammaproteobacteria;Betaproteobacteriales;Methylophilaceae;Methylotenera;Ambiguous_taxa	0	0.00176526	0	0	0	0	0	0	0	0	0	0	0	0	0	0	0	0	0	0	0	0	0	0	0	0	0	0	0	0	0	0	0	0	0	0	0	0	0	0	0	0	0	0	0	0	0	0	0
Proteobacteria;Gammaproteobacteria;Betaproteobacteriales;Methylophilaceae;Methylotenera;uncultured bacterium	0.168477	0	0.101779	0	0	0	0	0	0	0	0	0.00555988	0	0	0	0	0	0	0	0	0	0	0	0	0	0	0	0	0	0	0	0	0	0	0	0	0	0	0	0	0	0	0	0	0	0	0	0	0
Proteobacteria;Gammaproteobacteria;Betaproteobacteriales;Methylophilaceae;Methylotenera;__	0	0	0	0.0402567	0	0	0	0	0	0	0	0	0	0	0	0	0	0	0	0	0	0	0	0	0	0	0	0	0	0	0	0	0	0	0	0	0	0	0	0	0	0	0	0	0	0	0	0	0
Proteobacteria;Gammaproteobacteria;Betaproteobacteriales;Methylophilaceae;OM43 clade;Ambiguous_taxa	0	0	0	0	0	0	0	0	0	0	0	0	0	0	0	0	0	0	0	0	0	0	0	0.0425569	0.0541017	0	0	0	0	0.0172121	0	0	0	0	0	0	0	0	0	0	0	0	0	0	0	0	0	0	0
Proteobacteria;Gammaproteobacteria;Betaproteobacteriales;Methylophilaceae;__;__	0	0	0	0	0	0	0	0	0	0	0	0	0	0	0	0	0	0	0	0	0	0	0	0	0	0	0	0	0	0	0	0	0	0	0	0	0	0	0	0	0	0	0	0	0	0	0	0	0
Proteobacteria;Gammaproteobacteria;Betaproteobacteriales;Neisseriaceae;uncultured;metagenome	0	0	0	0	0	0	0	0	0	0	0	0	0	0	0	0	0	0	0	0	0.0232818	0	0	0.00375502	0	0	0	0	0	0	0	0	0	0	0	0	0	0	0	0	0	0	0	0	0.00516196	0	0	0	0
Proteobacteria;Gammaproteobacteria;Betaproteobacteriales;Neisseriaceae;uncultured;uncultured bacterium	0	0	0	0	0	0	0	0	0	0	0	0	0	0	0	0	0	0	0	0	0	0	0	0	0	0	0	0	0	0	0	0	0	0	0	0	0	0	0	0	0	0	0	0	0	0	0	0	0
Proteobacteria;Gammaproteobacteria;Betaproteobacteriales;Neisseriaceae;uncultured;uncultured beta proteobacterium	0	0	0	0	0	0	0	0	0	0	0	0	0	0	0	0	0	0	0	0	0	0	0	0	0	0	0	0	0	0	0	0	0	0	0	0	0	0	0	0	0	0	0	0	0	0	0	0	0
Proteobacteria;Gammaproteobacteria;Betaproteobacteriales;Neisseriaceae;uncultured;__	0	0	0	0	0	0	0	0	0	0	0	0	0	0	0	0	0	0	0	0	0	0	0	0	0	0	0	0	0	0	0	0	0	0	0	0	0	0	0	0	0.0222683	0	0	0	0	0	0.00989315	0	0
Proteobacteria;Gammaproteobacteria;Betaproteobacteriales;Nitrosomonadaceae;Nitrosomonas;uncultured beta proteobacterium	0	0	0	0	0	0	0	0	0	0	0	0	0	0	0	0	0	0	0	0	0	0	0	0	0	0	0	0	0	0	0	0	0	0	0	0	0	0	0	0.0342177	0	0	0	0	0	0	0	0	0
Proteobacteria;Gammaproteobacteria;Betaproteobacteriales;Nitrosomonadaceae;__;__	0	0	0	0	0	0	0	0	0	0	0	0	0	0	0	0	0	0	0	0	0	0	0	0	0	0	0	0	0	0	0	0	0	0	0	0	0	0	0	0	0	0	0	0	0	0	0	0	0
Proteobacteria;Gammaproteobacteria;Betaproteobacteriales;Rhodocyclaceae;Azospira;Ambiguous_taxa	0	0	0	0	0	0	0	0	0	0	0	0	0	0	0	0	0	0.0485782	0	0	0	0	0	0	0	0	0	0	0	0	0	0	0	0	0	0	0	0	0	0	0	0	0	0	0	0	0	0	0
Proteobacteria;Gammaproteobacteria;Betaproteobacteriales;Rhodocyclaceae;Dechloromonas;__	0	0	0	0	0	0	0	0	0	0	0	0	0	0	0	0	0	0	0	0	0	0	0	0	0	0	0	0	0	0	0	0	0	0	0	0	0	0	0	0	0	0	0	0	0	0	0	0	0
Proteobacteria;Gammaproteobacteria;Betaproteobacteriales;__;__;__	0	0	0	0	0	0	0	0.0196457	0	0	0.222352	0.0266874	0	0	0	0	0	0	0.0590026	0	0	0	0	0	0	0	0.126634	0	0	0	0	0	0	0	0.013803	0	0	0	0	0	0	0	0	0	0	0	0	0	0.0286639
Proteobacteria;Gammaproteobacteria;CCM19a;uncultured bacterium;uncultured bacterium;uncultured bacterium	0	0	0	0	0	0	0	0	0	0	0	0	0	0	0	0	0	0	0	0	0	0	0	0	0	0	0	0	0	0	0	0	0	0	0	0	0	0	0	0	0	0	0	0	0	0	0	0	0
Proteobacteria;Gammaproteobacteria;Cardiobacteriales;Wohlfahrtiimonadaceae;Ignatzschineria;Ambiguous_taxa	0	0	0	0	0	0	0	0	0	0	0	0	0	0.0100388	0	0	0	0	0	0	0	0.0270728	0	0	0	0	0	0	0	0	0	0	0	0	0	0	0	0	0	0	0	0	0	0.00892631	0	0	0	0	0
Proteobacteria;Gammaproteobacteria;Cardiobacteriales;Wohlfahrtiimonadaceae;Koukoulia;Ambiguous_taxa	0	0	0	0	0	0	0	0	0	0	0	0	0	0	0	0	0	0	0	0	0	0	0	0	0	0	0	0	0	0	0	0	0	0	0	0	0	0	0	0	0	0	0	0	0	0	0	0	0.0229311
Proteobacteria;Gammaproteobacteria;Cardiobacteriales;Wohlfahrtiimonadaceae;Wohlfahrtiimonas;Ambiguous_taxa	0	0	0	0	0	0	0	0	0	0	0	0	0	0	0	0	0	0	0	0	0	0	0	0	0	0.0113746	0.0198343	0	0	0	0	0	0	0	0	0	0	0	0	0	0	0	0	0	0	0	0	0	0
Proteobacteria;Gammaproteobacteria;Cellvibrionales;Cellvibrionaceae;Cellvibrio;Ambiguous_taxa	0	0	0	0	0	0	0	0	0	0	0	0	0	0	0	0	0	0	0	0.00823621	0	0	0	0	0	0	0	0.011245	0	0	0	0	0	0	0	0.00995446	0	0	0	0	0	0	0	0	0	0	0	0	0
Proteobacteria;Gammaproteobacteria;Cellvibrionales;Cellvibrionaceae;Cellvibrio;__	0	0	0	0	0	0	0	0	0	0	0	0	0	0	0	0	0	0	0	0	0	0	0	0	0	0	0	0	0	0	0	0	0	0	0	0	0	0	0	0	0	0	0	0	0	0	0	0	0
Proteobacteria;Gammaproteobacteria;Cellvibrionales;Halieaceae;Halioglobus;uncultured marine bacterium	0	0	0	0	0	0	0	0	0	0	0	0	0	0	0	0	0	0	0	0	0	0	0	0	0	0	0	0	0	0	0	0	0	0	0	0	0	0	0	0	0	0	0	0	0	0	0	0	0
Proteobacteria;Gammaproteobacteria;Cellvibrionales;Halieaceae;Luminiphilus;Ambiguous_taxa	0	0	0	0	0	0	0	0	0	0	0	0	0	0	0	0	0	0	0	0	0	0	0	0	0	0	0	0	0	0	0	0	0	0	0	0	0	0	0	0.0552748	0	0	0	0	0	0	0	0	0
Proteobacteria;Gammaproteobacteria;Cellvibrionales;Halieaceae;OM60(NOR5) clade;Ambiguous_taxa	0	0	0	0	0	0	0	0	0	0	0	0	0	0	0	0	0	0	0	0	0	0	0	0	0	0	0	0	0	0	0	0	0	0	0	0	0	0	0	0	0	0	0	0.0252912	0	0	0	0	0
Proteobacteria;Gammaproteobacteria;Cellvibrionales;Halieaceae;OM60(NOR5) clade;metagenome	0	0	0	0	0	0	0	0	0	0	0	0	0	0	0	0	0	0	0	0	0	0	0	0	0	0	0	0	0	0	0	0	0	0	0	0	0	0	0	0	0	0	0	0	0	0	0	0	0
Proteobacteria;Gammaproteobacteria;Cellvibrionales;Halieaceae;OM60(NOR5) clade;uncultured marine bacterium	0	0	0	0	0	0	0	0	0	0	0	0	0	0	0	0	0	0	0	0	0	0	0	0	0	0	0	0	0	0	0	0	0	0	0	0	0	0	0	0	0	0	0	0	0	0	0	0	0
Proteobacteria;Gammaproteobacteria;Cellvibrionales;Halieaceae;OM60(NOR5) clade;__	0	0	0	0	0	0	0	0	0	0	0	0	0	0	0	0	0	0	0	0	0	0	0	0	0	0	0	0	0	0	0	0	0	0	0	0	0	0	0	0	0	0	0	0	0	0	0	0	0
Proteobacteria;Gammaproteobacteria;Cellvibrionales;Halieaceae;__;__	0	0	0	0	0	0	0	0	0	0	0	0	0	0	0	0	0	0	0.0212409	0	0	0	0	0	0.0200949	0	0	0	0	0	0	0	0	0	0	0.0460394	0	0	0.0432072	0.0552748	0.22097	0	0	0.00743859	0	0	0	0	0
Proteobacteria;Gammaproteobacteria;Cellvibrionales;Porticoccaceae;Porticoccus;Ambiguous_taxa	0	0	0	0	0	0	0	0	0	0	0	0	0	0	0	0	0	0	0	0	0	0	0	0	0	0	0	0	0	0	0	0	0	0.0173134	0	0.0273748	0	0	0	0	0	0	0	0	0	0.0255393	0	0	0
Proteobacteria;Gammaproteobacteria;Cellvibrionales;Porticoccaceae;Porticoccus;uncultured marine bacterium	0	0	0	0	0	0	0	0	0	0	0	0	0	0	0	0	0	0	0	0	0	0	0	0	0	0	0	0	0	0	0	0	0	0	0	0	0	0	0	0	0	0	0.00306545	0	0	0	0	0	0
Proteobacteria;Gammaproteobacteria;Cellvibrionales;Porticoccaceae;SAR92 clade;Ambiguous_taxa	0	0	0	0	0	0	0	0	0	0	0	0	0	0	0	0	0	0	0	0.0219632	0.00698454	0	0	0.057577	0	0	0	0	0.0103438	0.0319654	0.0293805	0	0	0	0	0	0	0	0	0	0	0	0	0	0	0	0	0	0
Proteobacteria;Gammaproteobacteria;Cellvibrionales;Porticoccaceae;SAR92 clade;uncultured marine bacterium	0	0	0	0	0	0	0	0	0	0	0	0	0	0	0	0	0	0.00844838	0	0.00411811	0	0.0287648	0	0	0	0	0	0	0.0219806	0.108191	0	0.035594	0	0	0	0	0	0	0	0	0	0	0	0	0	0	0	0	0
Proteobacteria;Gammaproteobacteria;Cellvibrionales;Porticoccaceae;SAR92 clade;__	0	0	0	0	0	0	0	0	0	0	0	0	0	0	0	0	0	0.0478742	0	0	0	0	0	0	0.0927457	0.0151661	0	0.0161646	0.0129298	0.0688485	0.0101702	0	0	0	0	0	0	0	0.0123449	0	0	0	0	0	0	0	0	0	0
Proteobacteria;Gammaproteobacteria;Cellvibrionales;Spongiibacteraceae;BD1-7 clade;uncultured marine bacterium	0	0	0	0	0	0	0	0	0	0	0	0	0	0	0	0	0	0	0	0	0	0	0	0	0	0	0	0	0	0	0	0	0	0	0	0	0	0	0	0	0	0	0	0	0	0	0	0	0
Proteobacteria;Gammaproteobacteria;Cellvibrionales;Spongiibacteraceae;uncultured;Ambiguous_taxa	0	0	0	0	0	0	0	0	0	0	0	0	0	0	0	0	0	0	0	0	0	0	0	0	0	0	0	0	0	0	0	0	0	0	0	0	0	0	0	0	0	0	0	0	0	0	0	0	0
Proteobacteria;Gammaproteobacteria;Chromatiales;Chromatiaceae;Candidatus Thiobios;__	0	0	0	0	0	0	0	0	0	0	0	0	0	0	0	0	0	0	0	0	0	0	0	0	0	0	0	0	0	0	0	0	0	0	0	0	0	0	0	0	0	0	0	0	0	0	0	0	0
Proteobacteria;Gammaproteobacteria;Coxiellales;Coxiellaceae;Coxiella;metagenome	0	0	0	0	0	0	0	0	0	0	0	0	0	0	0	0	0	0	0	0	0	0	0	0	0	0	0	0	0	0	0	0	0	0	0	0	0	0	0	0	0	0	0	0	0	0	0	0	0
Proteobacteria;Gammaproteobacteria;Coxiellales;Coxiellaceae;Coxiella;uncultured gamma proteobacterium	0	0	0	0	0	0	0	0	0	0	0	0	0	0	0	0	0	0	0	0	0	0	0	0	0	0	0	0	0	0	0	0	0	0	0	0	0	0	0	0	0	0	0	0	0	0	0	0	0
Proteobacteria;Gammaproteobacteria;Diplorickettsiales;Diplorickettsiaceae;Rickettsiella;Ambiguous_taxa	0	0	0	0	0	0	0	0	0	0	0	0	0	0	0	0	0	0	0	0	0	0	0	0	0	0	0	0	0.0051719	0	0	0	0	0	0	0.0149317	0.0130634	0	0.0308623	0	0	0	0	0	0	0	0	0	0
Proteobacteria;Gammaproteobacteria;Diplorickettsiales;Diplorickettsiaceae;Rickettsiella;Proasellus assaforensis	0	0	0	0	0	0	0	0	0	0	0	0	0	0	0	0	0	0	0	0	0	0	0	0	0	0	0	0	0	0	0	0	0	0	0	0	0	0	0	0	0	0	0	0	0	0	0	0	0
Proteobacteria;Gammaproteobacteria;Diplorickettsiales;Diplorickettsiaceae;uncultured;uncultured bacterium	0	0	0	0	0	0	0	0	0	0	0	0	0	0	0	0	0	0	0	0	0	0	0	0	0	0	0	0	0	0	0	0	0	0	0	0	0	0	0	0	0	0	0	0	0	0	0	0	0
Proteobacteria;Gammaproteobacteria;EV818SWSAP88;uncultured bacterium;uncultured bacterium;uncultured bacterium	0	0	0	0	0	0	0	0	0	0	0	0	0	0	0	0	0	0	0	0	0	0	0	0	0	0	0	0	0	0	0	0	0	0	0	0	0	0	0	0	0	0	0	0	0	0	0	0	0
Proteobacteria;Gammaproteobacteria;Enterobacteriales;Enterobacteriaceae;Citrobacter;__	0	0	0	0	0	0	0	0	0	0	0	0	0	0	0	0	0	0	0	0	0	0.0287648	0	0	0	0	0	0	0	0	0	0	0	0	0	0	0	0	0	0	0	0	0	0	0	0	0	0	0
Proteobacteria;Gammaproteobacteria;Enterobacteriales;Enterobacteriaceae;Cronobacter;Ambiguous_taxa	0	0	0	0	0	0	0	0	0	0	0	0	0	0	0	0	0	0	0	0	0	0	0	0	0	0	0	0	0	0	0	0	0	0	0	0	0	0	0	0	0	0	0	0	0	0	0	0	0
Proteobacteria;Gammaproteobacteria;Enterobacteriales;Enterobacteriaceae;Enterobacter;__	0	0	0	0	0.10083	0	0	0	0	0	0	0	0	0	0	0	0	0	0	0	0	0	0	0	0	0	0	0	0	0	0	0	0	0.0296802	0	0	0	0	0	0	0	0	0	0	0	0	0	0	0
Proteobacteria;Gammaproteobacteria;Enterobacteriales;Enterobacteriaceae;Erwinia;Ambiguous_taxa	0.00665041	0.00706102	0	0	0	0	0	0	0	0	0	0	0	0.011712	0	0	0	0	0	0	0.0500559	0	0	0	0.0541017	0.0326071	0.0595029	0	0	0	0	0	0.050408	0.153348	0	0.0236418	0	0	0	0	0	0	0	0	0	0	0.00913214	0	0.0147414
Proteobacteria;Gammaproteobacteria;Enterobacteriales;Enterobacteriaceae;Erwinia;__	0	0	0	0	0	0	0	0	0	0	0	0	0	0	0	0	0	0	0	0	0	0	0	0	0	0	0	0	0	0	0.058761	0	0	0	0	0	0	0	0	0	0	0	0	0	0	0	0	0	0
Proteobacteria;Gammaproteobacteria;Enterobacteriales;Enterobacteriaceae;Escherichia-Shigella;__	0	0	0.360024	0.732909	0	0	0	0	0	0	0.0179075	0	0.164036	0	0	0	0	0	0	0	0	0	0	0	0	0	0	0	0.21722	0	0	0	0	0	0.0717756	0.08088	0	0	0	0	0.0119906	0	0	0	0	0	0	0	0
Proteobacteria;Gammaproteobacteria;Enterobacteriales;Enterobacteriaceae;Hafnia-Obesumbacterium;__	0	0	0	0	0	0	0	0	0	0.0243135	0	0	0	0	0	0	0	0	0	0	0	0	0	0	0	0	0	0	0	0	0	0	0	0	0	0	0	0	0	0	0	0	0	0	0	0	0	0	0
Proteobacteria;Gammaproteobacteria;Enterobacteriales;Enterobacteriaceae;Klebsiella;__	0	0.0114742	0	0	0	0	0	0	0	0	0	0	0	0	0	0	0	0	0	0.0233359	0	0	0	0	0	0	0	0	0	0	0	0	0	0	0.0207045	0	0	0	0	0	0	0	0	0	0	0	0	0	0
Proteobacteria;Gammaproteobacteria;Enterobacteriales;Enterobacteriaceae;Kluyvera;__	0	0	0	0	0	0	0	0	0	0	0	0	0	0	0	0	0	0	0	0	0	0	0	0	0	0	0	0	0	0	0	0	0	0	0	0	0	0	0	0	0	0	0	0	0	0	0	0	0
Proteobacteria;Gammaproteobacteria;Enterobacteriales;Enterobacteriaceae;Morganella;Ambiguous_taxa	0	0	0	0.0686732	0	0	0	0	0	0.0332711	0.035815	0.0678305	0.00800176	0.0167314	0	0	0.0110217	0.0267532	0.0165207	0.0233359	0.0244459	0.071066	0	0.0312919	0.0370983	0.0667309	0.0671315	0.00913653	0.0452541	0	0.0440708	0.108053	0	0	0	0	0	0	0	0	0	0	0	0	0	0	0	0	0
Proteobacteria;Gammaproteobacteria;Enterobacteriales;Enterobacteriaceae;Pantoea;uncultured bacterium	0	0	0	0	0	0	0	0	0	0	0	0	0	0	0	0	0	0	0	0	0	0	0	0	0	0	0	0	0	0	0	0	0	0.0420469	0	0	0	0	0	0	0	0	0	0	0	0	0	0	0
Proteobacteria;Gammaproteobacteria;Enterobacteriales;Enterobacteriaceae;Pantoea;__	0.0532033	0	0.00759544	0.171683	0.0229158	0	0	0.134246	0.259565	0.273846	0.0805838	0.0733904	0.0780172	0.0786374	0	0	0.132261	0.0858919	0.146326	0.130407	0.145511	0.109983	0	0.057577	0.132936	0.230525	0.199869	0.0316264	0.0672347	0.181957	0.196623	0.21992	0.532434	0.497143	0.501049	0.442973	0.0653168	0.345476	0.432072	0.905454	0.411107	0.00692713	0.00919634	0.333249	0	0.0539164	0.0167423	0.0122279	0.151509
Proteobacteria;Gammaproteobacteria;Enterobacteriales;Enterobacteriaceae;Plesiomonas;Ambiguous_taxa	0	0	0	0	0	0	0.0783819	0	0	0	0	0	0	0	0	0	0	0	0	0	0	0	0	0	0	0	0	0	0	0	0	0	0	0	0	0	0	0	0	0	0	0	0	0	0	0	0	0	0
Proteobacteria;Gammaproteobacteria;Enterobacteriales;Enterobacteriaceae;Pluralibacter;Ambiguous_taxa	0	0	0	0	0	0	0	0	0	0	0	0	0	0	0	0	0	0	0	0	0	0	0	0	0	0	0	0	0	0	0	0	0	0	0	0	0	0	0	0	0	0	0	0	0	0	0	0	0
Proteobacteria;Gammaproteobacteria;Enterobacteriales;Enterobacteriaceae;Proteus;Proteus mirabilis	0	0	0	0	0	0	0	0	0	0.0563049	0	0.0100078	0	0	0	0	0	0	0	0	0	0	0	0	0	0	0	0	0	0	0	0	0	0	0	0	0	0.0383862	0	0	0	0	0	0	0	0	0	0	0
Proteobacteria;Gammaproteobacteria;Enterobacteriales;Enterobacteriaceae;Proteus;__	0	0	0	0	0	0	0	0	0	0	0	0	0	0	0	0	0	0	0	0	0	0	0	0	0	0	0	0	0	0	0	0	0	0	0	0	0	0	0	0	0	0	0	0	0	0	0	0	0
Proteobacteria;Gammaproteobacteria;Enterobacteriales;Enterobacteriaceae;Providencia;Ambiguous_taxa	0	0	0	0	0	0	0	0	0	0.0166355	0	0	0	0	0	0	0	0	0	0	0	0	0	0	0	0	0	0	0	0	0	0	0	0	0	0	0	0.014075	0	0	0	0	0	0	0	0	0	0	0.0360346
Proteobacteria;Gammaproteobacteria;Enterobacteriales;Enterobacteriaceae;Providencia;__	0	0	0	0	0	0	0	0	0	0	0	0	0	0	0	0	0	0	0	0	0	0	0	0	0	0.00682475	0.0167829	0	0.0258595	0	0	0	0	0	0	0	0	0	0	0	0	0	0	0	0	0	0	0	0
Proteobacteria;Gammaproteobacteria;Enterobacteriales;Enterobacteriaceae;Rahnella;__	0	0	0	0	0	0	0	0	0	0	0	0	0	0	0	0	0	0	0	0	0	0	0	0	0	0	0	0	0	0	0	0	0	0	0	0	0	0	0	0	0	0	0	0	0	0	0	0	0
Proteobacteria;Gammaproteobacteria;Enterobacteriales;Enterobacteriaceae;Salmonella;__	0	0	0.672956	0.134978	0	0	0	0	0.183118	0	0.0193998	0	0	0.0200776	0	0	0	0	0.0141606	0.027454	0	0	0	0.0162718	0	0	0.0396686	0	0.162915	0	0	0.0292379	0	0.0222601	0.0234651	0.274992	0	0	0	0	0.0325459	0	0	0	0.44909	0	0	0	0
Proteobacteria;Gammaproteobacteria;Enterobacteriales;Enterobacteriaceae;Serratia;Ambiguous_taxa	0	0	0.151909	0	0	0	0	0	0	0	0.122368	0	0	0	0	0	0	0	0	0	0	0	0	0.050067	0	0.0189576	0	0	0	0	0	0.133477	0	0	0	0	0	0	0	0	0	0	0	0	0	0	0	0.133149	0
Proteobacteria;Gammaproteobacteria;Enterobacteriales;Enterobacteriaceae;Serratia;Serratia marcescens	0	0	0	0	0	0	0	0	0	0	0	0	0	0	0	0	0	0	0	0	0	0	0	0	0	0	0	0	0	0	0	0	0	0	0	0	0	0	0	0.0526427	0	0	0	0	0	0	0	0	0
Proteobacteria;Gammaproteobacteria;Enterobacteriales;Enterobacteriaceae;Serratia;__	0	0	0	0	0	0	0	0	0	0	0	0	0	0	0	0	0	0	0	0	0.0291023	0	0	0	0	0	0	0	0	0	0	0	0	0	0	0	0	0	0	0	0	0	0	0	0	0	0	0	0
Proteobacteria;Gammaproteobacteria;Enterobacteriales;Enterobacteriaceae;Sodalis;__	0	0	0	0	0	0	0	0	0	0	0	0	0	0	0	0	0	0	0	0	0	0	0	0	0	0	0	0	0	0	0	0	0	0	0	0	0	0	0	0	0	0	0	0	0	0	0	0	0
Proteobacteria;Gammaproteobacteria;Enterobacteriales;Enterobacteriaceae;Yersinia;Ambiguous_taxa	0	0	0	0	0	0	0	0	0	0	0	0	0	0	0	0	0	0.0161927	0	0	0.0372509	0.0169205	0	0.0175234	0	0	0	0.0133534	0	0	0	0.0343228	0	0	0	0	0	0	0	0.126342	0	0	0	0	0	0	0	0	0
Proteobacteria;Gammaproteobacteria;Enterobacteriales;Enterobacteriaceae;Yersinia;uncultured bacterium	0	0	0	0	0	0	0	0	0	0	0	0	0	0	0	0	0	0	0	0	0	0	0	0	0	0	0	0	0	0	0	0	0	0	0	0	0	0	0	0	0	0	0	0	0	0	0	0	0
Proteobacteria;Gammaproteobacteria;Enterobacteriales;Enterobacteriaceae;__;__	0.141875	0.00706102	0	0	0.0504148	0	0	0.1146	0.0213341	0	0	0.0300234	0	0	0	0	0.117565	0.0105605	0	0	0	0	0	0.00125167	0.0293695	0.00758305	0.00610286	0.0224899	0	0	0.00904016	0	0	0.202815	0	0.08088	0.0186619	0.0191931	0.080242	0	0	0	0	0.0595088	0	0	0	0.0692916	0.0376725
Proteobacteria;Gammaproteobacteria;Ga0077536;Ambiguous_taxa;Ambiguous_taxa;Ambiguous_taxa	0	0	0	0	0	0	0	0	0	0	0	0	0	0	0	0	0	0	0	0	0	0	0	0	0	0	0	0	0	0	0	0	0	0	0.0124227	0	0	0.0153545	0	0	0	0	0	0	0.0593625	0	0	0	0
Proteobacteria;Gammaproteobacteria;Gammaproteobacteria Incertae Sedis;Unknown Family;metagenome;metagenome	0	0	0	0	0	0	0	0	0	0	0	0	0	0	0	0	0	0	0	0	0	0	0	0	0	0	0	0	0	0	0	0	0	0	0	0	0	0	0	0	0	0	0	0	0	0	0	0	0.0114655
Proteobacteria;Gammaproteobacteria;KI89A clade;uncultured marine bacterium;uncultured marine bacterium;uncultured marine bacterium	0	0	0	0	0	0	0	0	0	0	0	0	0	0	0	0	0	0	0	0	0	0	0	0	0	0	0	0	0	0	0	0.0610182	0	0	0	0	0	0	0	0	0	0	0	0	0	0	0	0	0
Proteobacteria;Gammaproteobacteria;Legionellales;Legionellaceae;Legionella;Ambiguous_taxa	0	0	0	0	0	0	0	0	0	0	0	0	0	0	0	0	0	0	0	0	0	0	0	0	0	0	0	0	0	0	0.0169503	0	0	0	0	0	0	0	0	0	0	0	0	0	0	0	0	0	0
Proteobacteria;Gammaproteobacteria;Legionellales;Legionellaceae;Legionella;Candidatus Legionella jeonii	0	0	0	0	0	0	0	0	0	0	0	0	0	0	0	0	0	0	0	0	0	0	0	0	0.0139119	0	0	0	0	0	0	0	0	0	0	0	0	0	0	0	0	0	0	0	0	0	0	0	0
Proteobacteria;Gammaproteobacteria;Legionellales;Legionellaceae;Legionella;uncultured bacterium	0	0	0	0	0.142078	0	0	0	0.00355568	0	0	0	0	0	0	0	0	0	0	0	0	0	0	0	0	0	0	0	0	0	0	0	0	0	0	0	0	0	0	0	0	0	0	0	0	0	0	0	0
Proteobacteria;Gammaproteobacteria;Legionellales;Legionellaceae;Legionella;__	0	0	0	0	0	0	0	0	0	0.0294321	0	0	0	0	0	0	0	0	0	0	0	0	0	0	0	0	0	0	0	0	0	0	0	0	0	0	0	0	0	0.0605391	0	0	0	0	0.0258098	0	0	0	0
Proteobacteria;Gammaproteobacteria;Nitrosococcales;Methylophagaceae;Marine Methylotrophic Group 3;uncultured bacterium	0	0	0	0	0	0	0	0	0	0	0	0	0	0	0	0	0	0	0	0	0	0	0	0	0	0	0	0	0	0	0	0	0	0	0	0	0	0	0	0	0	0	0	0	0	0	0	0	0
Proteobacteria;Gammaproteobacteria;Nitrosococcales;Methylophagaceae;uncultured;uncultured bacterium	0	0	0	0	0	0	0	0	0	0	0	0	0	0	0	0	0	0	0	0	0	0	0	0	0	0	0	0	0	0	0	0	0	0	0	0	0	0	0	0	0	0	0	0	0	0	0	0	0
Proteobacteria;Gammaproteobacteria;OM182 clade;Ambiguous_taxa;Ambiguous_taxa;Ambiguous_taxa	0	0	0	0	0	0	0	0	0	0	0	0	0	0	0	0	0	0	0	0	0	0	0	0	0.00618305	0	0	0	0	0	0	0	0	0	0	0	0	0	0	0	0	0	0	0	0	0	0	0	0
Proteobacteria;Gammaproteobacteria;OM182 clade;__;__;__	0	0	0	0	0	0	0	0	0	0	0	0	0	0	0	0	0	0	0	0	0	0	0	0	0	0	0	0	0	0	0	0	0	0	0	0	0	0	0	0	0	0	0	0	0	0	0	0	0
Proteobacteria;Gammaproteobacteria;Oceanospirillales;Alcanivoracaceae;Alcanivorax;__	0	0	0	0	0	0	0	0	0	0	0	0	0	0	0	0	0	0	0	0	0	0	0	0	0	0	0	0.00983934	0	0	0.0361606	0	0	0	0	0	0	0	0	0	0	0	0	0	0	0	0	0	0
Proteobacteria;Gammaproteobacteria;Oceanospirillales;Halomonadaceae;Halomonas;Halomonas flava	0	0	0	0	0	0	0	0	0	0	0	0	0	0	0	0	0	0	0	0	0	0	0	0	0	0	0	0	0	0	0	0	0	0	0	0	0	0	0	0	0	0	0	0	0	0	0	0	0
Proteobacteria;Gammaproteobacteria;Oceanospirillales;Halomonadaceae;Halomonas;__	1.12835	0.0388356	0	0.870255	2.78198	0	0	0	0.645356	0	1.06997	0.661626	1.98644	0	0	0	0	0.0865959	0.108565	0	0.0791581	0.0169205	0	0.335449	0	0	0.251743	0	0.00905083	0.00737663	0	0.34577	0	0.413049	0	0	4.30904	0	0.0895006	1.57665	0.5293	0	0.00408726	0	0.769132	0	0.0418557	0.059781	0
Proteobacteria;Gammaproteobacteria;Oceanospirillales;Nitrincolaceae;uncultured;Ambiguous_taxa	0	0	0	0	0	0	0	0	0	0	0	0	0	0	0	0	0	0.0267532	0.0118005	0.0123543	0.0419072	0	0	0.185248	0.17158	0.0242658	0.0854401	0.0133534	0.0943872	0.209004	0.0881416	0.017797	0	0	0	0	0	0.00383862	0	0	0	0	0	0	0	0	0	0	0
Proteobacteria;Gammaproteobacteria;Oceanospirillales;Pseudohongiellaceae;Pseudohongiella;seawater metagenome	0	0	0	0	0	0	0	0	0	0	0	0	0	0	0	0	0	0	0	0	0	0	0	0	0	0	0	0	0.00905083	0	0	0	0	0.049467	0	0	0	0.0345476	0	0	0	0.00519534	0	0	0	0	0	0	0
Proteobacteria;Gammaproteobacteria;Oceanospirillales;Pseudohongiellaceae;Pseudohongiella;__	0	0	0	0	0	0	0	0	0	0	0	0	0	0	0	0	0.152467	0.0457621	0	0	0.0162973	0.0118443	0	0.0137684	0.0123661	0	0	0.00421686	0.0206876	0.0418009	0.0282505	0	0	0	0	0	0	0	0	0	0	0	0	0	0	0	0	0	0
Proteobacteria;Gammaproteobacteria;Oceanospirillales;SS1-B-06-26;Escherichia coli;Escherichia coli	0	0	0	0	0	0	0	0	0	0	0	0	0	0	0	0	0	0	0	0	0	0	0	0	0	0	0	0	0	0	0	0	0	0	0	0	0	0	0	0	0	0	0	0	0	0	0	0	0
Proteobacteria;Gammaproteobacteria;Oceanospirillales;Saccharospirillaceae;Oleibacter;Ambiguous_taxa	0	0	0	0	0	0	0	0	0	0	0	0	0	0	0	0	0	0	0	0.0150997	0.0139691	0	0	0	0	0	0	0	0	0.0270476	0	0	0	0	0	0	0	0	0	0	0	0	0	0	0	0	0	0	0
Proteobacteria;Gammaproteobacteria;Oceanospirillales;Saccharospirillaceae;Oleispira;uncultured bacterium	0	0	0	0	0	0	0	0	0	0.0575845	0	0	0	0	0	0	0	0	0	0	0	0	0	0	0	0.00834136	0	0	0	0	0	0	0	0	0	0	0	0	0	0	0	0	0	0	0	0	0	0	0
Proteobacteria;Gammaproteobacteria;Oceanospirillales;Saccharospirillaceae;Oleispira;__	0	0	0	0	0	0	0	0	0	0	0	0	0	0	0	0	0	0	0	0	0	0	0	0.0112651	0	0	0	0	0.0129298	0	0	0	0	0	0	0	0	0	0	0	0	0	0	0	0	0	0	0	0
Proteobacteria;Gammaproteobacteria;Pasteurellales;Pasteurellaceae;Haemophilus;uncultured bacterium	0	0	0	0	0	0	0	0	0	0	0	0	0	0	0	0	0	0.00492822	0	0	0	0	0	0	0	0	0	0	0	0	0	0	0	0	0	0	0	0	0	0	0	0	0	0	0	0	0	0	0.0122845
Proteobacteria;Gammaproteobacteria;Pasteurellales;Pasteurellaceae;__;__	0	0	0	0	0	0	0	0	0	0	0	0	0	0	0	0	0	0	0	0	0	0	0	0	0	0	0	0	0	0	0	0	0	0	0	0	0	0	0	0	0	0	0	0	0	0	0	0	0
Proteobacteria;Gammaproteobacteria;Pseudomonadales;Moraxellaceae;Acinetobacter;Ambiguous_taxa	0	0	0	0	0	0	0	0	0	0.0729404	0	0	0	0.0568866	0	0	0.0642933	0	0	0	0	0.0287648	0	0	0	0.017441	0.0137314	0	0.0349103	0.0516364	0.0361606	0	0	0.0865672	0.0110424	0.135629	0	0.0204727	0	0	0	0	0	0	0.121306	0.0156074	0.0289184	0	0
Proteobacteria;Gammaproteobacteria;Pseudomonadales;Moraxellaceae;Acinetobacter;Acinetobacter baumannii	0	0	0	0	0.0229158	0	0	0	0	0.00895759	0	0	0.0640141	0	0	0	0	0	0	0	0	0	0	0	0	0	0.0457715	0	0.00905083	0	0.057631	0	0	0	0	0.0261305	0	0	0	0	0.13361	0.015586	0.0470035	0.217207	0	0	0	0	0
Proteobacteria;Gammaproteobacteria;Pseudomonadales;Moraxellaceae;Acinetobacter;Acinetobacter bereziniae	0	0	0	0	0	0	0	0	0	0	0	0	0	0	0	0	0	0.0344976	0	0	0	0	0	0	0	0	0	0	0	0	0	0	0	0	0	0	0	0	0	0	0	0	0	0	0	0	0	0	0
Proteobacteria;Gammaproteobacteria;Pseudomonadales;Moraxellaceae;Acinetobacter;__	0	0	0	0	0	0	0	0	0.0497795	0.0550252	0	0	0.0980216	0	0	0	0	0.115461	0	0.0192178	0	0	0	0.0287885	0.0494644	0	0	0.0133534	0	0	0	0.0330515	0	0	0	0	0	0	0	0.0473784	0	0	0	0	0	0	0	0	0
Proteobacteria;Gammaproteobacteria;Pseudomonadales;Moraxellaceae;Enhydrobacter;Ambiguous_taxa	0	0	0	0	0	0	0	0	0	0	0	0	0	0	0	0	0	0	0.0377617	0	0	0	0	0	0	0	0	0	0	0	0	0	0	0	0	0	0	0	0	0	0	0	0	0	0	0	0	0	0
Proteobacteria;Gammaproteobacteria;Pseudomonadales;Moraxellaceae;Enhydrobacter;uncultured bacterium	0	0	0	0	0	0	0	0	0	0	0	0	0	0	0	0	0	0	0	0	0	0	0	0	0	0	0	0	0	0	0	0	0	0	0	0	0	0.016634	0	0	0	0	0	0	0	0	0	0	0
Proteobacteria;Gammaproteobacteria;Pseudomonadales;Moraxellaceae;Enhydrobacter;__	0	0	0	0	0	0	0	0	0	0	0	0.217947	0	0	0	0	0	0	0	0	0	0.0169205	0	0	0	0.00758305	0	0	0	0	0	0	0	0	0	0	0	0	0.0185174	0	0	0	0	0	0	0	0	0	0.0196552
Proteobacteria;Gammaproteobacteria;Pseudomonadales;Moraxellaceae;Moraxella;Ambiguous_taxa	0	0.0061784	0	0.164579	0	0	0	0	0	0	0	0	0	0	0	0	0	0	0	0	0	0	0	0	0	0	0.0198343	0	0	0	0	0	0	0	0	0	0	0	0	0	0	0	0	0	0	0	0	0	0.00982761
Proteobacteria;Gammaproteobacteria;Pseudomonadales;Moraxellaceae;Psychrobacter;Ambiguous_taxa	0	0	0	0.058017	0.114579	0	0	0.0163714	0	0.158677	0.0164152	0.159013	0.0120026	0	0	0	0.0349021	0.0154887	0.0118005	0.0343176	0.119901	0.103215	0	0.0550737	0.0556474	0.123604	0.164777	0.055522	0.0232736	0.231134	0.150293	0.0800864	0.044107	0	0	0.0124431	0	0.101084	0.00925869	0.0500105	0.0188424	0	0.00306545	0.0267789	0	0	0	0	0.0343966
Proteobacteria;Gammaproteobacteria;Pseudomonadales;Moraxellaceae;Psychrobacter;__	0.00886721	0	0	0.00947216	0	0	0	0.09168	0.277343	0.140762	0.12386	0.155677	0.0600132	0.1121	0	0	0.104706	0.0422419	0.0118005	0	0.0314304	0	0	0.0287885	0.0386441	0.0265407	0.0732344	0	0.0129298	0	0.0678012	0.0279667	0.06301	0.0964606	0	0	0	0	0.067897	0	0	0	0	0	0	0	0	0	0
Proteobacteria;Gammaproteobacteria;Pseudomonadales;Moraxellaceae;[Agitococcus] lubricus group;metagenome	0.390157	0	0	0	0	0	0	0	0	0	0	0	0	0	0	0	0	0	0	0	0.0221177	0	0	0	0	0	0	0	0	0	0	0	0	0	0	0	0.0242605	0	0	0	0	0	0	0	0	0	0	0	0
Proteobacteria;Gammaproteobacteria;Pseudomonadales;Moraxellaceae;uncultured;uncultured gamma proteobacterium	0	0	0	0	0	0	0	0	0	0	0	0	0	0	0	0	0	0	0	0	0	0	0	0	0	0	0	0	0	0	0	0	0	0	0	0	0	0	0	0	0	0	0	0	0	0	0	0	0
Proteobacteria;Gammaproteobacteria;Pseudomonadales;Pseudomonadaceae;Azotobacter;__	0	0	0	0.0343366	0	0	0	0	0	0	0	0	0	0	0	0	0	0	0	0	0	0	0	0	0	0	0	0	0	0	0	0	0	0	0	0	0	0	0	0	0	0	0	0	0	0	0	0	0
Proteobacteria;Gammaproteobacteria;Pseudomonadales;Pseudomonadaceae;Oblitimonas;Oblitimonas alkaliphila	0	0	0	0	0	0	0	0	0	0	0	0	0	0.011712	0	0	0	0	0	0	0	0	0	0	0	0.0265407	0	0	0	0.0319654	0.00904016	0	0	0	0	0	0	0	0	0	0	0	0	0	0	0	0	0	0
Proteobacteria;Gammaproteobacteria;Pseudomonadales;Pseudomonadaceae;Pseudomonas;Ambiguous_taxa	0	0	0	0	0	0	0	0	0	0	0	0	0	0	0	0	0	0	0	0	0	0	0	0	0	0	0	0	0	0	0	0	0.0409565	0	0	0	0	0	0	0	0	0	0	0	0	0	0	0	0
Proteobacteria;Gammaproteobacteria;Pseudomonadales;Pseudomonadaceae;Pseudomonas;Spumella sp. AR4D6	0.172911	0	0	0	0	0	0	0	0	0	0	0	0	0	0	0	0	0	0	0	0	0	0	0	0	0	0	0	0	0	0	0	0	0	0	0	0	0	0	0	0	0	0	0	0	0	0	0	0
Proteobacteria;Gammaproteobacteria;Pseudomonadales;Pseudomonadaceae;Pseudomonas;bioreactor metagenome	0	0	0	0.0319686	0	0	0	0	0.26312	0.0882963	0.126845	0.156789	0.116026	0.0501941	0	0	0.0698042	0.0781476	0	0.0178451	0	0.0287648	0	0.0162718	0.0417356	0.0386736	0.0228857	0.00632529	0	0.0762251	0.0508509	0.0127121	0	0	0	0.00871015	0	0.0153545	0	0	0	0	0	0.0193403	0	0	0	0	0
Proteobacteria;Gammaproteobacteria;Pseudomonadales;Pseudomonadaceae;Pseudomonas;uncultured bacterium	0	0.0123568	0	0	0	0	0	0	0	0	0	0	0.0580128	0	0	0	0	0	0	0	0	0	0	0.0100134	0	0.0121329	0.0152572	0	0	0	0.0282505	0.00508485	0	0	0	0	0	0	0	0	0	0	0	0	0	0	0	0	0
Proteobacteria;Gammaproteobacteria;Pseudomonadales;Pseudomonadaceae;Pseudomonas;uncultured soil bacterium	0	0	0	0	0	0	0	0	0	0	0	0	0	0	0	0	0	0	0	0	0	0	0	0	0	0	0	0	0	0	0	0	0	0	0	0	0	0	0	0	0	0	0	0	0	0	0	0	0
Proteobacteria;Gammaproteobacteria;Pseudomonadales;Pseudomonadaceae;Pseudomonas;__	4.93904	0	15.2972	0.381255	0.591228	83.6078	5.58384	0.222652	0.376902	0.163796	0.120876	0.860669	0	0.254317	0.827468	11.0731	0.56027	0.279501	0.122725	0.140016	0.200224	0.236887	0	0.108896	0.15303	0.448158	0.186137	0.0815259	0.288333	0.425385	0.316406	0.307634	0.229986	0.121194	0.567303	0.304855	0.136232	0.254629	0.496883	0.792272	0.0565272	0.0380992	0	0.307958	0.281327	0	0.0197863	0.0163039	0.256337
Proteobacteria;Gammaproteobacteria;Pseudomonadales;Pseudomonadaceae;__;__	0	0	0	0	0	0	0	0	0	0	0	0	0	0	0	0	0	0	0	0	0	0	0	0	0	0	0	0	0	0	0	0	0	0	0	0	0	0	0	0	0	0	0	0	0	0	0	0	0
Proteobacteria;Gammaproteobacteria;SAR86 clade;metagenome;metagenome;metagenome	0	0	0	0	0	0	0	0	0	0	0	0	0	0	0	0	0	0	0	0	0	0	0	0	0	0	0	0	0	0	0	0	0	0	0	0	0	0	0	0	0	0	0	0	0	0	0	0	0
Proteobacteria;Gammaproteobacteria;SAR86 clade;uncultured marine bacterium;uncultured marine bacterium;uncultured marine bacterium	0	0	0	0	0	0	0	0	0	0	0	0	0	0	0	0	0	0	0	0	0	0	0	0	0	0	0	0	0	0	0	0	0	0	0	0	0	0	0	0	0	0	0	0	0	0	0	0	0
Proteobacteria;Gammaproteobacteria;SAR86 clade;__;__;__	0	0	0	0	0	0	0	0	0	0	0	0	0	0	0	0	0.0734781	0.198537	0.0188808	0.0260813	0.0861427	0.072758	0	0.0450603	0.0293695	0.0341237	0.0823887	0.0105421	0.0491331	0.0467186	0.0519809	0.0279667	0	0	0.0110424	0.0136874	0.00559858	0.078052	0.108018	0	0.063379	0	0	0.0505824	0.110982	0.0227016	0	0	0
Proteobacteria;Gammaproteobacteria;Steroidobacterales;Woeseiaceae;Woeseia;Ambiguous_taxa	0	0	0	0	0	0	0	0	0	0	0	0	0	0	0	0	0	0	0	0	0	0	0	0	0	0	0	0	0	0	0	0	0	0	0	0	0	0	0	0	0	0	0	0	0	0	0	0	0
Proteobacteria;Gammaproteobacteria;Thiomicrospirales;Thioglobaceae;Ambiguous_taxa;Ambiguous_taxa	0	0	0	0	0	0	0	0	0	0	0	0	0	0	0	0	0	0	0	0	0	0	0	0	0	0	0	0	0	0	0	0	0	0	0	0	0	0	0	0	0	0	0	0	0	0	0	0	0
Proteobacteria;Gammaproteobacteria;Thiomicrospirales;Thioglobaceae;SUP05 cluster;uncultured bacterium	0	0	0	0	0	0	0	0	0	0	0	0	0	0	0	0	0	0	0	0	0	0	0	0	0	0	0	0	0	0	0	0	0	0	0	0	0	0	0	0	0	0	0	0	0	0	0	0	0
Proteobacteria;Gammaproteobacteria;Thiomicrospirales;Thioglobaceae;SUP05 cluster;__	0	0	0	0	0	0	0	0	0	0	0	0	0	0	0	0	0	0.0401298	0	0	0	0	0	0.050067	0.0417356	0.0257824	0.0793372	0	0	0.078684	0.0305105	0	0	0	0	0	0	0	0.0246898	0	0	0	0	0	0	0.00567541	0	0	0
Proteobacteria;Gammaproteobacteria;Thiotrichales;Thiotrichaceae;Thiothrix;uncultured bacterium	0	0	0	0	0	0	0	0	0	0	0	0	0	0	0	0	0	0	0	0	0	0	0	0	0	0	0	0	0	0	0	0	0	0	0	0	0	0	0	0	0	0	0	0	0	0	0	0	0
Proteobacteria;Gammaproteobacteria;Thiotrichales;Thiotrichaceae;Thiothrix;uncultured gamma proteobacterium	0	0	0	0	0	0	0	0	0	0	0	0	0	0	0	0	0	0	0	0	0	0	0	0.00625837	0	0	0	0	0	0	0	0	0	0	0	0	0	0	0	0	0	0	0	0	0	0	0	0	0
Proteobacteria;Gammaproteobacteria;Thiotrichales;Thiotrichaceae;Thiothrix;__	0	0	0	0	0	0	0	0	0	0	0	0	0	0	0	0	0	0	0	0	0	0	0	0	0	0	0	0	0	0	0	0	0	0	0	0	0	0	0	0	0	0	0	0	0	0	0	0	0
Proteobacteria;Gammaproteobacteria;Thiotrichales;Thiotrichaceae;uncultured;Ambiguous_taxa	0	0	0	0	0	0	0	0	0	0	0	0	0	0	0	0	0	0	0	0	0	0	0	0	0	0	0	0	0	0	0	0	0	0	0	0	0	0	0	0.039482	0	0	0	0	0	0	0	0	0
Proteobacteria;Gammaproteobacteria;UBA10353 marine group;Ambiguous_taxa;Ambiguous_taxa;Ambiguous_taxa	0	0	0	0	0	0	0	0	0	0	0	0	0	0	0	0	0	0	0	0	0	0	0	0	0	0	0	0	0	0	0	0	0	0	0	0.0634597	0.0111972	0	0.0370348	0.0579069	0.0445366	0	0	0	0.0129049	0.0163168	0	0	0
Proteobacteria;Gammaproteobacteria;Vibrionales;Vibrionaceae;Aliivibrio;Ambiguous_taxa	0.011084	0	0	0.10893	0.26124	0	0	0.694149	0.176006	0.252092	0.153706	0.314689	0.0660145	0.0685986	0	0	0.172674	0.179528	0.0731632	0.150997	0.192075	0.263959	0	0.212785	0.296786	0.407968	0.3204	0.0759035	0.133176	0.54587	0.236174	0.4195	0.037806	0	0	0.124431	0	0.0537407	0.123449	0	0.0342589	0	0	0.0461193	0	0.318532	0.0175033	0	0
Proteobacteria;Gammaproteobacteria;Vibrionales;Vibrionaceae;Aliivibrio;uncultured bacterium	0	0.0123568	0.086588	0	0	0	0	0.0523886	0.300455	0.344227	0.0701377	0.162348	0.0140031	0.174006	0	0	0.227782	0.25838	0.101485	0.0631443	0.0663531	0.0896785	0.49492	0.0788555	0.208678	0.261615	0.231909	0.0126506	0.0310314	0.125403	0.161593	0.274582	0.025204	0.178081	0.0524514	0	0	0.125395	0.0956731	0.12371	0	0	0.376028	0.0461193	0.141954	1.0684	0	0	0
Proteobacteria;Gammaproteobacteria;Vibrionales;Vibrionaceae;Aliivibrio;__	0	0	0	0	0	0	0	0	0	0.11133	0	0	0.018004	0	0	0	0.172674	0.0802596	0	0.141388	0.0675172	0.071066	0	0.0300402	0.0340068	0.0636976	0.129686	0.0267068	0.0685277	0.125403	0.116392	0	0	0	0	0.0584824	0	0.0447839	0.0277761	0	0.118193	0	0	0	0	0.0659766	0	0	0
Proteobacteria;Gammaproteobacteria;Vibrionales;Vibrionaceae;Photobacterium;Ambiguous_taxa	0	0	0	0.0911696	0	0	0	0	0	0.683336	0	0	0	0	0	0	0.457401	0.0457621	0	0.0658897	0	0	0	0.0788555	0.494644	0.503515	0	0.0864456	0	0	0	0	0	0	0.135269	0	0	0	0	0	0	0	1.17815	0.165137	0	0	0	0	0
Proteobacteria;Gammaproteobacteria;Vibrionales;Vibrionaceae;Photobacterium;Photobacterium damselae subsp. piscicida (causative agent of fish	0	0	0	0	0	0	0	0	0	0.0115169	0	0.0344713	0	0	0	0	0.0569455	0.0598427	0.068443	0.0494173	0	0.0473773	0	0.0237818	0.214861	0.102371	0.131212	0	0.0400822	0.122944	0.0768414	0.114409	0	0	0	0	0	0	0	0	0	0	0	0	0	0	0	0	0
Proteobacteria;Gammaproteobacteria;Vibrionales;Vibrionaceae;Photobacterium;Photobacterium profundum	0	0	0	0	0	0	0	0	0	0	0	0	0.0340075	0.0217508	0	0	0	0.0415379	0	0	0	0	0	0	0	0	0	0	0	0	0	0	0	0	0	0	0	0	0	0	0	0	0	0	0	0	0	0	0
Proteobacteria;Gammaproteobacteria;Vibrionales;Vibrionaceae;Photobacterium;Photobacterium sp. D1-1	0	0	0	0	0	0	0	0	0	0	0	0	0	0	0	0	0	0	0	0	0	0	0	0	0	0	0	0	0	0	0	0	0	0	0	0	0	0	0	0	0	0	0	0	0	0	0	0	0
Proteobacteria;Gammaproteobacteria;Vibrionales;Vibrionaceae;Photobacterium;uncultured bacterium	0.0243848	0	0.0759544	0.21786	0.297905	0	0	0.0589372	0	0.620633	0.146245	0.571556	0.082018	0.349685	0	0	0.161652	0.453397	0.068443	0.321212	0.213028	0.218274	0.366946	0.20903	0.330793	0.380669	0.453138	0.0541164	0.10861	0.302442	0.349176	0.334329	0	0.0371002	0.111804	0.0584824	0	0.0268704	0.040121	0	0	0	0.0265672	0.139846	0	0	0	2.75808	0.0196552
Proteobacteria;Gammaproteobacteria;Vibrionales;Vibrionaceae;Photobacterium;__	5.23609	0.929407	3.11109	9.90788	9.06091	0	0.00693645	14.3479	11.0742	57.7368	26.3225	33.3704	15.0293	31.0634	0.0289417	0.0054034	37.7898	38.4683	19.6125	32.7705	32.6958	32.6227	99.1212	24.0196	45.2506	42.1671	42.9169	6.86715	11.5993	38.6929	48.827	41.2852	13.4369	13.0148	10.1811	15.0785	2.82728	12.8146	14.5485	13.9424	5.17823	0.784497	92.5939	14.1393	2.96812	1.46567	0.350826	87.8196	6.38794
Proteobacteria;Gammaproteobacteria;Vibrionales;Vibrionaceae;Vibrio;Vibrio rumoiensis 1S-45	0	0	0	0.0639371	0	0	0	0	0.453349	0.0550252	0.108937	0.618259	0.0880194	0.135524	0	0	0.0183695	0.0126726	0.0519223	0.064517	0.0314304	0.0829103	0	0.0751004	0.109749	0.0424651	0.0808629	0.00913653	0	0.110649	0.0644111	0.179241	0	0	0	0	0	0	0	0	0	0	0	0	0	0	0	0	0
Proteobacteria;Gammaproteobacteria;Vibrionales;Vibrionaceae;Vibrio;Vibrio splendidus	0	0	0	0	0	0	0	0	0.0906699	0.0422286	0	0.110086	0.032007	0.0384821	0	0	0	0	0	0	0	0	0	0.00876172	0.0494644	0	0	0.00491967	0	0	0.0316406	0.035594	0.0346555	0	0	0	0	0	0	0	0	0	0	0	0	0	0	0	0
Proteobacteria;Gammaproteobacteria;Vibrionales;Vibrionaceae;Vibrio;uncultured bacterium	0	0	0	0	0	0	0	0	0	0	0	0	0	0	0	0	0	0	0	0	0	0	0	0	0	0	0	0	0	0	0	0	0	0	0	0	0	0	0	0	0	0	0	0	0	0	0	0	0.00409484
Proteobacteria;Gammaproteobacteria;Vibrionales;Vibrionaceae;Vibrio;__	0	0	0	0	0	0	0	0	0	0.0230338	0	0.16346	0	0	0	0	0	0.0323855	0.068443	0.0562808	0.038415	0	0	0	0	0.00379153	0.0289886	0	0	0.0516364	0.0429408	0.0216106	0	0	0	0.00995446	0	0	0.0216036	0	0	0	0	0	0	0	0	0	0
Proteobacteria;Gammaproteobacteria;Vibrionales;Vibrionaceae;__;__	0	0	0	0	0	0	0	0	0	0	0	0.103414	0	0	0	0	0	0	0	0	0	0	0	0	0	0	0	0	0	0	0	0	0	0	0	0	0	0	0	0	0	0	0	0	0	0	0	0	0
Proteobacteria;Gammaproteobacteria;Xanthomonadales;Rhodanobacteraceae;Luteibacter;Ambiguous_taxa	0	0	0	0	0	0	0	0	0	0	0	0	0	0	0	0	0	0	0	0	0	0	0	0	0	0	0	0	0	0	0	0	0	0	0	0	0	0	0	0	0	0	0	0	0	0	0	0	0
Proteobacteria;Gammaproteobacteria;Xanthomonadales;Rhodanobacteraceae;Tahibacter;uncultured bacterium	0.179561	0	0	0	0	0	0	0	0	0	0	0	0	0	0	0	0	0	0	0	0	0	0	0	0	0	0	0	0	0	0	0	0	0	0	0	0	0	0	0	0	0	0	0.0208281	0	0	0	0	0
Proteobacteria;Gammaproteobacteria;Xanthomonadales;Xanthomonadaceae;Luteimonas;__	0.0133008	0	0	0	0	0	0	0	0	0	0	0	0	0	0	0	0	0	0	0	0	0	0	0	0	0	0.0198343	0	0	0.0122944	0	0	0	0	0	0	0	0	0	0	0	0	0	0	0	0	0	0	0
Proteobacteria;Gammaproteobacteria;Xanthomonadales;Xanthomonadaceae;Lysobacter;Ambiguous_taxa	0	0	0	0	0	0	0	0	0	0	0	0	0	0	0	0	0	0	0	0	0	0	0	0	0	0	0	0	0	0	0	0	0	0	0	0	0	0	0	0	0	0	0	0	0	0	0	0	0
Proteobacteria;Gammaproteobacteria;Xanthomonadales;Xanthomonadaceae;Lysobacter;__	0	0	0	0	0	0	0	0	0	0	0	0	0	0	0	0	0	0	0	0	0	0	0	0	0	0	0	0	0	0	0	0.00762728	0	0	0	0	0	0	0	0.0263213	0	0	0	0	0	0	0	0	0
Proteobacteria;Gammaproteobacteria;Xanthomonadales;Xanthomonadaceae;Pseudoxanthomonas;uncultured synthetic wastewater bacterium tmbr15-4	0	0	0	0	0	0	0	0	0	0.108771	0	0.0511509	0	0.0602329	0	0	0	0.0197129	0	0	0.0803222	0.0778342	0	0.00625837	0.0912	0.16986	0.0350915	0.0203815	0.0155157	0.204087	0.058761	0.0673743	0.0724615	0.148401	0.0207045	0.128164	0.0653168	0.0934065	0.0586384	0	0.0668048	0	0.00510908	0.133895	0	0.00709426	0	0	0
Proteobacteria;Gammaproteobacteria;Xanthomonadales;Xanthomonadaceae;Silanimonas;uncultured bacterium	0	0	0	0	0	0	0	0	0	0	0	0	0	0	0	0	0	0.00281613	0	0	0	0	0	0	0	0	0	0	0	0	0	0	0	0	0	0	0	0	0	0	0	0	0	0	0	0	0	0	0
Proteobacteria;Gammaproteobacteria;Xanthomonadales;Xanthomonadaceae;Stenotrophomonas;Ambiguous_taxa	0	0	0	0	0	0	0	0	0	0	0	0	0	0	0	0	0	0	0.00472021	0	0	0	0	0	0	0	0	0	0	0	0	0	0	0	0	0	0	0	0.0555521	0	0	0	0	0	0	0.0177357	0	0	0
Proteobacteria;Gammaproteobacteria;Xanthomonadales;Xanthomonadaceae;Stenotrophomonas;__	0	0	0.0622826	0	0	0	0	0.0982286	0	0	0	0	0	0	0	0	0	0	0	0.0150997	0.0221177	0.035533	0	0	0.0123661	0.00454983	0	0.00491967	0	0	0.0237304	0	0	0	0.0151833	0.048528	0	0.0562998	0	0.0131607	0	0	0	0	0	0	0	0	0.0278449
Proteobacteria;Gammaproteobacteria;Xanthomonadales;Xanthomonadaceae;uncultured;uncultured bacterium	0	0	0	0	0	0	0	0	0	0	0	0	0	0	0	0	0	0	0	0	0	0	0	0	0	0	0.0091543	0	0	0	0	0	0	0	0	0	0	0	0	0	0	0	0	0	0	0	0	0	0
Proteobacteria;Gammaproteobacteria;uncultured;metagenome;metagenome;metagenome	0	0	0	0	0	0	0	0	0	0	0	0	0	0	0	0	0	0	0	0	0	0	0	0	0	0	0	0	0	0	0	0	0	0	0	0	0	0	0	0	0	0	0	0	0	0	0.00761012	0	0
Proteobacteria;Gammaproteobacteria;__;__;__;__	0	0	0	0	0	0	0	0	0	0	0	0	0	0	0	0	0	0	0	0	0	0	0	0	0	0	0.0167829	0	0	0	0	0	0	0	0	0.00746584	0	0.0243113	0.0277761	0.0315856	0	0	0	0	0	0	0.00532708	0	0
Proteobacteria;__;__;__;__;__	0	0	0	0	0	0	0	0	0	0	0	0	0	0	0	0	0	0	0	0	0	0	0	0	0	0	0	0	0	0	0	0	0	0	0	0	0	0	0	0	0	0	0	0	0	0	0	0	0
Spirochaetes;Leptospirae;Leptospirales;Leptospiraceae;Turneriella;metagenome	0	0	0	0	0	0	0	0	0	0	0	0	0	0	0	0	0	0	0	0	0	0	0	0	0	0	0	0	0	0	0	0	0	0	0	0	0	0	0	0	0	0	0	0	0	0	0	0	0
Spirochaetes;Spirochaetia;Brevinematales;Brevinemataceae;Brevinema;Brevinema andersonii	11.0352	0.0970891	6.31485	0	4.42275	0.254395	0	0	0.0497795	0	0.0373073	0	1.62236	0.110427	0	0	0	0	0.309174	6.01655	0.00931272	0.00507614	0	0	0.151485	0	0.0808629	82.6083	66.7033	8.58885	0	7.90568	0	0	0	0	0.00373239	0	0	0	0	0	0	0	0.00516196	0	0	0	0.0204742
Spirochaetes;Spirochaetia;Spirochaetales;Spirochaetaceae;Sphaerochaeta;wall-less spirochete	0	0	0	0.0686732	0	0	0	0	0.0266676	0.116449	0.361135	0	0.0420092	0	0	0	0.0532716	0.0943403	0	0.0123543	0.0349227	0	0	0.00751004	0.00618305	0.0583895	0	0	0	0	0.0632811	0.0432213	0	0	0	0	0	0.00767725	0.0123449	0.00526427	0	0	0	0	0	0	0.00152202	0	0
Spirochaetes;Spirochaetia;Spirochaetales;Spirochaetaceae;Sphaerochaeta;__	0	0	0	0	0	0	0	0	0	0	0.0850607	0	0	0	0	0	0	0	0	0.0219632	0	0	0	0	0	0	0	0	0	0	0	0	0	0	0	0	0	0	0	0	0	0	0	0	0	0	0	0	0
Tenericutes;Mollicutes;Acholeplasmatales;Acholeplasmataceae;Acholeplasma;Ambiguous_taxa	0	0	0	0	0	0	0	0	0	0	0	0	0	0.0719449	0	0	0	0	0	0	0	0	0	0	0	0.00227492	0	0	0	0	0	0	0	0	0	0.0199089	0	0	0.0216036	0.0921247	0	0	0	0	0	0	0	0	0
Tenericutes;Mollicutes;Anaeroplasmatales;Anaeroplasmataceae;Anaeroplasma;uncultured Cytophaga sp.	0	0	0	0	0	0	0	0	0	0.0153559	0	0	0	0.00501941	0	0	0	0	0	0	0	0	0	0	0	0	0	0	0	0.0098355	0.00791014	0	0	0	0	0	0	0	0	0	0	0	0	0	0	0	0	0	0
Tenericutes;Mollicutes;Haloplasmatales;Haloplasmataceae;Haloplasma;Ambiguous_taxa	0	0	0	0	0	0	0	0.0949543	0	0	0.0119383	0	0	0	0	0	0	0	0	0	0	0	0	0	0	0	0	0	0	0	0	0	0.0535585	0	0	0	0	0	0	0.0131607	0.0359718	0.00519534	0.0132836	0.285642	0.0593625	0	0	0	0
Tenericutes;Mollicutes;Izimaplasmatales;Ambiguous_taxa;Ambiguous_taxa;Ambiguous_taxa	0	0	0	0	0	0	0	0	0	0	0	0	0	0	0	0	0	0	0	0	0	0	0	0	0	0	0	0	0	0	0	0	0	0	0	0	0	0	0	0	0	0.0484899	0.00204363	0.171088	0	0	0	0	0
Tenericutes;Mollicutes;Mollicutes Incertae Sedis;Unknown Family;Candidatus Phytoplasma;__	0	0	0	0	0	0	0	0	0	0	0	0	0	0	0	0	0	0	0	0	0	0	0	0	0	0	0	0.0990962	0	0	0	0	0	0	0	0	0	0	0	0	0	0	0	0	0.0180668	0	0	0	0
Tenericutes;Mollicutes;Mycoplasmatales;Mycoplasmataceae;Mycoplasma;Oncorhynchus mykiss (rainbow trout)	0	0	0	0	0	0	0	0	0	0	0	0	0	0	0	0	0	0.0021121	0	0	0	0.00846024	0	0	0	0	0	0	0	0	0	0	0	0	0	0	0	0	0	0	0	0	0	0	0	0	0	0	0
Tenericutes;Mollicutes;Mycoplasmatales;Mycoplasmataceae;Mycoplasma;uncultured bacterium	0	0.0494272	0	0	0.0320821	0	0.00554916	0.0196457	0.00533352	0.11261	0.00298458	0	0.212047	0	0.0118398	0.0154383	0	0.0105605	0.00708031	0	0	0	0	0.0125167	0.00618305	0.0690058	0	0	0.0155157	0.0122944	0.0180803	0.00889849	6.80823	0.049467	0	0.0833686	50.2977	0.0332681	1.96284	0.0289535	11.0314	88.2724	0.975834	4.81575	20.7072	82.3601	0.0197863	4.56373	2.20548
Thermotogae;Thermotogae;Thermotogales;Fervidobacteriaceae;Fervidobacterium;Ambiguous_taxa	0	0	0	0	0	0	0	0	0	0	0	0	0	0.00836568	0	0	0	0	0	0	0	0	0	0	0.00463729	0	0	0	0	0	0	0	0	0	0	0	0	0	0	0	0	0	0	0	0	0	0	0	0
Thermotogae;Thermotogae;Thermotogales;Fervidobacteriaceae;Thermosipho;uncultured Thermosipho sp.	0	0	0	0	0	0	0	0	0	0.0204745	0.11043	0.0189036	0.0200044	0.0870031	0	0	0	0	0	0	0	0	0	0	0	0	0.00457715	0	0	0	0.0101702	0	0	0	0	0	0	0	0	0	0	0	0	0	0	0	0	0	0
Thermotogae;Thermotogae;Thermotogales;Thermotogaceae;Thermotoga;Ambiguous_taxa	0	0	0	0	0	0	0	0	0	0.0217542	0.0835684	0.0111198	0.0380084	0.061906	0	0	0	0	0.00708031	0	0	0.035533	0	0	0	0	0	0	0	0	0	0	0	0	0.0055212	0	0	0	0	0	0	0	0	0	0	0	0	0	0
Verrucomicrobia;Verrucomicrobiae;Chthoniobacterales;Chthoniobacteraceae;Chthoniobacter;metagenome	0	0	0	0	0	0	0	0	0	0	0	0	0	0	0	0	0	0	0	0	0	0	0	0	0	0	0	0	0	0	0	0	0	0	0	0	0	0	0	0	0	0	0	0	0	0	0	0	0
Verrucomicrobia;Verrucomicrobiae;Chthoniobacterales;__;__;__	0	0	0.0607635	0	0	0	0	0	0	0	0	0	0	0	0	0	0	0	0	0	0	0	0	0	0	0	0	0	0	0	0	0	0	0	0	0	0	0	0	0	0	0	0	0	0	0	0	0	0
Verrucomicrobia;Verrucomicrobiae;Opitutales;Opitutaceae;Opitutus;__	0	0	0	0	0	0	0	0	0	0	0	0	0	0	0	0	0	0	0	0	0	0	0	0	0	0	0	0	0	0	0	0	0	0.0049467	0	0	0	0	0	0	0	0	0	0	0	0	0	0	0
Verrucomicrobia;Verrucomicrobiae;Opitutales;Puniceicoccaceae;Lentimonas;Ambiguous_taxa	0	0	0	0	0	0	0	0	0	0	0	0	0	0	0	0	0	0	0	0	0	0	0	0	0	0	0	0	0	0	0	0	0	0	0	0	0	0	0	0	0	0	0	0	0	0	0	0	0
Verrucomicrobia;Verrucomicrobiae;Opitutales;Puniceicoccaceae;MB11C04 marine group;uncultured Puniceicoccaceae bacterium	0	0	0	0	0	0	0	0	0	0	0	0	0	0	0	0	0	0	0	0	0	0	0	0	0	0	0	0	0	0	0	0	0	0	0	0	0	0	0	0	0	0	0	0	0	0	0	0	0
Verrucomicrobia;Verrucomicrobiae;Opitutales;Puniceicoccaceae;MB11C04 marine group;__	0	0	0	0	0	0	0	0	0	0	0	0	0	0	0	0	0	0	0	0	0	0	0	0	0	0	0	0	0	0	0	0	0	0	0	0.0410621	0	0	0	0	0	0	0	0	0	0	0	0	0
Verrucomicrobia;Verrucomicrobiae;Opitutales;Puniceicoccaceae;Verruc-01;__	0	0	0	0	0	0	0	0	0.0835585	0	0	0	0	0	0	0	0	0	0	0	0	0	0	0	0.00463729	0	0	0	0	0	0	0	0	0	0	0	0	0	0	0	0	0	0	0	0	0	0	0	0
Verrucomicrobia;Verrucomicrobiae;Pedosphaerales;Pedosphaeraceae;uncultured bacterium;uncultured bacterium	0	0	0	0	0	0	0	0	0	0	0	0	0	0	0	0	0	0	0	0	0	0	0	0	0	0	0	0	0	0	0	0	0	0	0	0	0	0	0	0	0	0	0	0	0	0	0	0	0
Verrucomicrobia;Verrucomicrobiae;Verrucomicrobiales;DEV007;uncultured Verrucomicrobia bacterium;uncultured Verrucomicrobia bacterium	0	0	0	0	0	0	0	0	0	0	0	0	0	0	0	0	0	0	0	0	0	0	0	0	0	0	0	0	0	0.00491775	0	0	0	0	0	0	0	0	0	0	0	0	0	0	0	0	0	0	0
Verrucomicrobia;Verrucomicrobiae;Verrucomicrobiales;Rubritaleaceae;Luteolibacter;uncultured bacterium	0.00886721	0	0	0	0	0	0	0	0	0	0	0	0	0	0	0	0	0	0	0	0	0	0	0	0	0	0	0	0	0	0	0	0	0	0	0	0	0	0	0	0	0	0	0	0	0	0	0	0
Verrucomicrobia;Verrucomicrobiae;Verrucomicrobiales;Rubritaleaceae;Luteolibacter;__	0	0	0	0	0	0	0	0	0	0	0	0	0	0	0	0	0	0	0	0	0	0	0	0	0	0	0	0	0	0	0	0	0	0	0	0.00497723	0	0	0	0	0	0	0	0	0	0	0	0	0
Verrucomicrobia;Verrucomicrobiae;Verrucomicrobiales;Verrucomicrobiaceae;Prosthecobacter;Ambiguous_taxa	0	0.00441314	0	0	0	0	0	0.0163714	0	0	0	0	0	0	0	0	0	0	0	0	0	0	0	0	0	0	0	0	0	0	0	0	0	0	0	0	0	0	0	0	0	0	0	0	0	0	0	0	0
Verrucomicrobia;Verrucomicrobiae;Verrucomicrobiales;Verrucomicrobiaceae;Prosthecobacter;uncultured bacterium	0	0	0.0577253	0.00355206	0	0	0	0	0	0	0	0	0	0	0	0	0	0	0	0	0	0	0	0.0100134	0	0	0	0	0	0	0	0	0	0	0	0	0	0	0	0	0	0	0	0	0.0103239	0	0	0	0
Verrucomicrobia;Verrucomicrobiae;Verrucomicrobiales;Verrucomicrobiaceae;Prosthecobacter;__	0	0	0	0	0	0	0	0	0	0	0	0	0	0	0	0	0	0	0	0	0	0	0	0	0	0	0	0	0	0	0	0	0	0	0	0	0	0	0	0	0	0	0	0	0	0	0	0	0
Verrucomicrobia;Verrucomicrobiae;Verrucomicrobiales;Verrucomicrobiaceae;uncultured;uncultured bacterium	0.206163	0.0123568	0.51649	0.12077	0.183326	0	0	0.186634	0.314678	0.00895759	0.0701377	0	0.0100022	0.025097	0	0	0.0642933	0.149255	0.0731632	0.0192178	0.0349227	0.0524535	0	0.0550737	0.0216407	0.00530814	0.0686572	0	0.00258595	0.0713074	0.0237304	0.114409	0.245739	0.185501	0.107663	0.0622154	0.427358	0.0319885	0.040121	0.102653	0.0873602	0.0190496	0.00510908	0.0743859	0.0283908	0.0120602	0.0121762	0.00951061	0.0622415
Verrucomicrobia;Verrucomicrobiae;Verrucomicrobiales;Verrucomicrobiaceae;__;__	0	0	0	0	0	0	0	0	0	0	0	0	0	0	0	0	0	0	0	0	0	0	0	0	0	0	0	0	0	0	0	0	0	0	0	0	0	0	0	0	0	0	0	0	0	0	0	0	0
WPS-2;metagenome;metagenome;metagenome;metagenome;metagenome	0	0	0	0	0	0	0	0	0	0	0	0	0	0	0	0	0.0918476	0	0	0	0	0	0	0	0	0	0	0	0	0	0	0	0	0	0	0	0	0	0	0	0	0	0	0	0	0	0	0	0
[truncated: 15 more columns]
