# Supplementary material for: Microbiota in intestinal digesta of Atlantic salmon (Salmo salar), observed from late freshwater stage until one year in seawater, and effects of functional ingredients: a case study from a commercial sized research site in the Arctic region
Source: Anim Microbiome. 2021 Jan 28;3:14. doi: 10.1186/s42523-021-00075-7 (PMC7841887; doi:10.1186/s42523-021-00075-7)
Supplement: Supplementary file 3 — Additional file 3: Table S2. The metadata of interest for multivariate association analysis. [file 42523_2021_75_MOESM3_ESM.xlsx]

## Sheet: Table S2
Table S2: The metadata of interest for multivariate association analysis
SampleID	Life_stage	Treatment	Plamma nutrients		qPCR_Immune fucntions								qPCR_Barrier fucntions			PC1 of PCA
			Cholesterol	Triglyceride	muc13	il1b	ifnr	il10	tgfb	cd8b	cd3	myd88	zo-1	claudin15	claudin-25b	plasma_nutrients	qPCR_immune	qPCR_barrier
39	FW	FW-Ref	3	1.3	9.2566	0.135747	0.0544237	0.0526916	0.0622769	0.163101	0.237948	1.32018	0.96056	2.78893	1.28866	-3.05814	-1.54311	0.0870359
41	FW	FW-Ref	5.4	5.8	7.06491	0.111477	0.0689263	0.0430172	0.121252	0.203929	0.213875	0.735543	0.890054	2.69259	1.91944	1.07439	-1.08852	0.511018
50	FW	FW-Ref	6.3	4.3	5.72266	0.159986	0.0257421	0.014455	0.0737564	0.119362	0.113981	0.796118	0.876183	2.6817	0.72384	0.904662	1.30793	-0.936821
53	FW	FW-Ref	4.1	3.8	11.7492	0.113151	0.075043	0.0715392	0.116108	0.311992	0.250407	2.01601	1.49979	5.01105	4.46111	-0.358195	-3.29111	3.33474
61	FW	FW-Ref	5.3	1.4	8.24098	0.419587	0.203713	0.0889001	0.0818822	0.399679	0.509543	2.03941	1.15695	3.62688	2.44503	-1.54762	-4.57789	1.64561
62	FW	FW-Ref	9.6	4	17.5657	0.296393	0.0815911	0.0328965	0.129523	0.139893	0.23805	1.85489	1.43803	10.5675	3.59697	1.79212	-3.01427	3.99438
63	FW	FW-Ref	8.9	4.1	10.2111	0.142916	0.0196919	0.0270807	0.0818693	0.34477	0.183697	1.38176	1.48022	3.84997	1.53838	1.6538	-1.29577	1.40116
46	FW	FW-Test	7.7	3.5	7.31242	0.0850663	0.0178625	0.0120852	0.0495633	0.14477	0.0939251	0.882556	0.95987	4.0333	1.05759	1.01673	1.75157	0.308777
48	FW	FW-Test	5.4	2.7	5.7462	0.0181714	0.0079066	0.0211719	0.0427673	0.153402	0.0886522	0.745951	0.61786	1.82549	0.948308	-0.311754	2.76158	-1.5685
59	FW	FW-Test	8.6	3.3	5.78745	0.0520796	0.0278525	0.0363875	0.0169912	0.130816	0.20919	0.995717	0.731514	2.10614	1.0147	1.17737	1.1077	-1.03386
67	FW	FW-Test	6.1	2.7	4.00947	0.0200436	0.00724883	0.0143374	0.0712248	0.112343	0.113606	0.702059	0.68492	1.5015	0.678473	-0.0170032	3.04589	-2.18107
68	FW	FW-Test	5.1	2.9	5.47795	0.0568391	0.0322601	0.0355164	0.0710448	0.131564	0.167724	1.04291	0.902172	1.81574	0.902803	-0.320426	0.376574	-1.11349
69	FW	FW-Test	8.5	3.5	6.64509	0.0318684	0.0426542	0.0276754	0.132848	0.235205	0.179029	0.898065	0.870138	1.49619	1.2402	1.25576	-0.293619	-0.969981
70	FW	FW-Test	8	1.8	20.2903	0.139285	0.0345081	0.0263927	0.111697	0.336897	0.249065	1.97326	2.17236	10.0305	2.32179	-0.096372	-3.02853	3.86677
71	FW	FW-Test	7.7	2.3	19.1752	0.543193	0.064418	0.0828098	0.100311	0.234047	0.252118	2.76732	2.13602	9.47681	3.84164	0.255583	-4.3745	4.49766
138	SW1	SW1-Ref	3.4	2.2	5.82166	0.0252509	0.00550212	0.0112202	0.0526917	0.153908	0.0869904	0.719997	0.871764	2.27465	1.3306	-1.80173	3.07971	-0.285224
139	SW1	SW1-Ref	3.8	2.3	4.8084	0.0213517	0.00474516	0.0300255	0.0434461	0.172692	0.11146	0.761182	0.812664	1.69709	1.06141	-1.45218	2.52841	-1.11873
149	SW1	SW1-Ref	5.7	1.9	4.34608	0.054108	0.0612702	0.0268836	0.0223669	0.114193	0.123368	0.602391	0.406621	1.85549	0.711387	-0.818056	2.20326	-2.55477
150	SW1	SW1-Ref	4.1	1.7	4.90978	0.0247794	0.0104725	0.0132114	0.0581195	0.12081	0.130153	0.56512	0.680976	1.27368	1.02792	-1.81643	2.80523	-1.81198
151	SW1	SW1-Ref	4.4	2.3	5.77957	0.0223092	0.00424154	0.0130673	0.0757055	0.219714	0.135416	0.786023	0.982046	1.57653	0.959429	-1.09767	2.12711	-1.1007
161	SW1	SW1-Ref	3.5	2.1	4.80524	0.0101104	0.00281722	0.00714757	0.0221116	0.121148	0.107837	0.672071	0.634143	1.63409	0.73927	-1.81597	4.65821	-2.04768
162	SW1	SW1-Ref	4	1.2	3.48253	0.0262119	0.00440907	0.0149965	0.048941	0.102386	0.156615	0.415221	0.527527	1.28886	0.713845	-2.50759	3.69669	-2.68673
163	SW1	SW1-Ref	3	2.4	10.197	0.0735622	0.0102695	0.0847071	0.535393	0.545802	0.627997	2.65349	1.35905	5.38916	2.45159	-1.94665	-4.89394	2.42464
144	SW1	SW1-Test	5.6	2.2	4.1794	0.0323772	0.00689614	0.0107233	0.0607548	0.155082	0.123651	0.587128	0.434663	1.71799	1.12257	-0.595081	2.99971	-1.90298
145	SW1	SW1-Test	4.6	1.6	7.28684	0.0359725	0.00693428	0.0357617	0.0815484	0.1717	0.1677	1.11368	1.1011	2.36902	1.34199	-1.64808	0.496527	0.112913
155	SW1	SW1-Test	5.8	1.9	5.59064	0.0307728	0.00717017	0.0118052	0.0541506	0.204467	0.157178	0.832236	0.838888	2.57944	1.00556	-0.776	1.96439	-0.5733
156	SW1	SW1-Test	4.3	2.2	5.43319	0.0640443	0.00450082	0.00710823	0.0396521	0.115079	0.116643	0.668372	0.568922	2.1621	0.986685	-1.23385	3.31844	-1.39297
157	SW1	SW1-Test	3.9	1.4	7.43658	0.0411797	0.00814123	0.0181909	0.0610908	0.0976037	0.126475	0.844858	0.952801	2.14694	1.13907	-2.28935	1.87724	-0.466098
167	SW1	SW1-Test	6.5	1.4	6.00724	0.0299653	0.00975637	0.0195106	0.0224734	0.133845	0.181966	0.707921	0.776019	1.85689	0.870849	-1.05409	2.29786	-1.34745
168	SW1	SW1-Test	5.2	1.3	5.09352	0.0177593	0.0033065	0.0135519	0.0560624	0.225719	0.155041	0.622049	0.94232	1.56658	0.881006	-1.72804	2.64914	-1.29189
169	SW1	SW1-Test	3.2	1.9	7.17962	0.0300793	0.0138355	0.0371678	0.105839	0.213052	0.191288	0.88846	0.9413	1.91271	1.23613	-2.21411	0.0436631	-0.524017
438	SW2	SW2-Ref	8.7	3.1	6.15721	0.0186357	0.032368	0.0503218	0.0789921	0.43558	0.203963	0.495184	0.811237	2.43426	1.14143	1.09198	0.0358655	-0.51619
439	SW2	SW2-Ref	6.7	8	8.61344	0.0259519	0.0327342	0.0725932	0.0809179	0.349625	0.215012	1.09069	1.09996	2.75223	1.47051	2.17901	-1.29345	0.452102
449	SW2	SW2-Ref	8.3	4.7	5.44037	0.0117934	0.0279912	0.0204924	0.0640639	0.249787	0.20868	0.87143	0.870034	2.28051	1.31329	1.73262	0.881264	-0.303531
451	SW2	SW2-Ref	7.7	4.3	10.703	0.0894371	0.0397374	0.0526954	0.129451	0.269083	0.227164	1.31254	1.23921	2.84922	1.84248	1.38992	-2.16851	0.996558
452	SW2	SW2-Ref	7.3	3.3	8.09817	0.0561467	0.0208879	0.0313765	0.110829	0.17707	0.171235	0.905239	0.790448	1.86125	1.25169	0.78106	-0.155059	-0.78994
461	SW2	SW2-Ref	8.7	4.7	5.41804	0.0507129	0.0441802	0.028507	0.103082	0.266525	0.217461	0.246491	0.724338	1.73165	0.823612	1.84644	0.770631	-1.62251
462	SW2	SW2-Ref	6.9	4.2	5.34942	0.0349983	0.0194454	0.033195	0.0553587	0.197296	0.14777	0.685056	0.737242	2.1758	1.16676	1.08199	1.20694	-0.774495
463	SW2	SW2-Ref	5.9	3.5	9.01592	0.0246588	0.0383526	0.0903909	0.0872166	0.448147	0.215738	1.29571	1.99119	3.83375	1.66986	0.372849	-1.88537	1.93308
444	SW2	SW2-Test	5.9	3.5	4.93447	0.018629	0.0194856	0.0468779	0.0779512	0.317902	0.179209	0.901548	0.82562	2.23701	1.12805	0.372849	0.314272	-0.62551
445	SW2	SW2-Test	6.4	2.5	9.34354	0.0753015	0.0343966	0.0581412	0.164693	0.346759	0.236876	1.4397	1.18125	3.17174	1.66332	-0.0404304	-2.4183	0.928411
456	SW2	SW2-Test	5.6	2.5	7.44328	0.0767787	0.0160018	0.0392853	0.104263	0.271313	0.191879	1.03168	0.859477	2.83968	1.33149	-0.363333	-0.68396	0.00273336
457	SW2	SW2-Test	7.7	3.3	6.45518	0.0443892	0.0472257	0.0631599	0.0903067	0.380301	0.252461	0.772506	0.888915	2.35088	1.17293	0.91006	-1.2115	-0.39578
458	SW2	SW2-Test	7.3	2.8	8.28203	0.0279405	0.0662636	0.0715599	0.0919263	0.481531	0.272743	1.14026	1.17063	3.25954	1.33083	0.483197	-2.11876	0.628722
467	SW2	SW2-Test	6.5	2.3	7.46606	0.0377314	0.0484819	0.0864246	0.0880685	0.214926	0.133594	1.01445	0.909415	2.59696	1.25568	-0.1541	-0.694497	-0.126597
468	SW2	SW2-Test	6.9	3	6.10324	0.0149556	0.0167922	0.0352779	0.05541	0.277498	0.153218	0.77667	0.851042	2.13038	0.848376	0.472002	1.00075	-1.0652
469	SW2	SW2-Test	7	3.1	12.6875	0.0808218	0.0492304	0.0969758	0.125665	0.41201	0.294993	1.68767	1.74963	5.73013	1.70353	0.566241	-3.52616	2.33583
645	SW3	SW3-Ref	5.5	2.9	7.53926	0.085329	0.0474491	0.0465764	0.145897	0.672173	0.241712	1.43352	1.62086	3.07877	1.76456	-0.137835	-2.59482	1.41963
646	SW3	SW3-Ref	8.1	2.1	4.0248	0.0151596	0.019354	0.0347235	0.0994473	0.607685	0.220222	0.978523	1.45279	1.99828	0.689562	0.213126	-0.0855307	-0.701146
649	SW3	SW3-Ref	7.8	3.4	5.93792	0.0666244	0.018418	0.0261667	0.108293	0.306325	0.151993	0.989313	1.27264	2.1707	1.12944	0.995383	-0.0249701	-0.0548835
651	SW3	SW3-Ref	5.9	3.1	4.7513	0.0249648	0.0120684	0.0257094	0.0935137	0.337584	0.141783	1.03695	1.30201	1.69723	0.747164	0.152835	0.771539	-0.964861
654	SW3	SW3-Ref	7	4.5	6.33942	0.0371037	0.0500345	0.0466631	0.114515	0.334488	0.179698	1.25458	1.61727	2.65145	0.958564	1.24186	-1.1142	0.321151
661	SW3	SW3-Ref	7.7	4.6	7.55441	0.029227	0.0432471	0.0519938	0.161214	0.456018	0.188633	1.38157	1.80058	3.08964	1.1803	1.51218	-1.78339	0.987272
662	SW3	SW3-Ref	6.5	3.3	5.84161	0.0270924	0.0280623	0.0436133	0.105282	0.336434	0.177865	1.13195	1.38662	2.68438	1.12726	0.500377	-0.507819	0.357214
663	SW3	SW3-Ref	4.5	2.2	6.32874	0.0175782	0.0338676	0.0318273	0.105482	0.314094	0.165978	1.24652	1.50566	3.29476	0.851217	-1.12391	-0.29638	0.347915
641	SW3	SW3-Test	7.7	3.3	6.41486	0.0219775	0.0734105	0.0400273	0.0901487	0.169098	0.126366	1.14805	1.22143	2.26853	1.13551	0.91006	0.0438412	-0.044033
642	SW3	SW3-Test	7.6	3.1	5.80384	0.0233331	0.0249378	0.0206236	0.0871823	0.322913	0.15068	0.892609	1.24288	2.37669	0.869362	0.765107	0.585836	-0.343924
655	SW3	SW3-Test	7.5	3.6	6.04458	0.0427252	0.0121781	0.0227794	0.0829953	0.327783	0.126783	0.991727	1.29444	2.10568	1.05225	1.00416	0.662823	-0.1761
656	SW3	SW3-Test	7	3.5	7.00675	0.0248987	0.0443258	0.0608401	0.131989	0.352396	0.15764	1.2264	1.46726	1.90122	1.01497	0.786255	-1.16427	-0.193171
657	SW3	SW3-Test	5.7	3.3	7.6468	0.0262212	0.0258126	0.0300168	0.103262	0.301618	0.134738	1.36171	1.60098	2.63847	1.47823	0.182784	-0.308067	0.93084
667	SW3	SW3-Test	7.6	3.7	5.55159	0.0356464	0.0284556	0.0420234	0.100766	0.370837	0.152615	1.1704	1.67997	2.67055	1.22868	1.08586	-0.433018	0.746252
668	SW3	SW3-Test	6.2	2.5	7.50323	0.0400358	0.0475654	0.0636962	0.124572	0.473401	0.186108	1.45266	1.89663	3.15782	1.29892	-0.117204	-1.9339	1.23025
669	SW3	SW3-Test	6.3	3.8	5.68737	0.0189116	0.0299495	0.0363145	0.0957047	0.272459	0.127439	0.953664	1.29833	1.89223	1.14516	0.680563	0.432584	-0.196561
